# Supplementary material for: Identification and Characterization of Chemosensory Receptors in the Pheromone Gland-Ovipositor of Spodoptera frugiperda (J. E. Smith)
Source: MDPI journal article supplement (doi:10.3390/insects13050481), 2022-05-21
Supplement: s1 [file s1]

**Table S1.** Primers for real-time quantitative-PCR of candidate *ORs*, *GRs*, and *IRs* in *S. frugiperda*.

| ID                 | Forward primer (5' to 3') | Reverse primer (5' to 3') |
|--------------------|---------------------------|---------------------------|
| <b><i>ORs</i></b>  |                           |                           |
| <i>SfruORco</i>    | ATGTTGTCAGATTGGTAGCA      | TCTTCAATGAGCCTGTTCC       |
| <i>SfruOR53</i>    | CGGTAAGAAATGCGACGATA      | CAGAGCGAATGGAGGAAG        |
| <i>SfruOR30</i>    | CCTGAACTTGGTGTCTG         | TTATTGGCAGCGTTGGAA        |
| <i>SfruOR60</i>    | CCACGCATAACCTCAGAC        | CCTCATCGCAGCATTCTT        |
| <i>SfruOR32</i>    | TCAGCATCACACTCCAGAA       | CGCTCATAGAAGATAGGAAGAA    |
| <i>SfruOR35</i>    | TGAGAAGCAGAGTGAAGTAG      | AGCCAGCGATTATCAGATG       |
| <i>SfruOR16</i>    | TTCCTATTGTTTCGCATCCAT     | CGGCTGTCTACTGTTACTG       |
| <i>SfruOR45</i>    | TGCTGATCTTGAAGAATCTG      | ATGGCGATGGAAGTGAAT        |
| <i>SfruOR50</i>    | GCCATCTGCTTCATAATCTG      | CCTCATACTGTTCTTCCTTCT     |
| <i>SfruOR39</i>    | GCACTTGTCTACGCTCTT        | TTGTTCTTCGTGTTACCTCT      |
| <i>SfruOR13</i>    | ATTCCAGAAGCAAGAGACAT      | CGGCAGATGATGGTAGTG        |
| <i>SfruOR3</i>     | TCTAGCAGCCTACGAGTC        | TTGAGAACAGCGAAGATGG       |
| <b><i>GRs</i></b>  |                           |                           |
| <i>SfruGR30</i>    | CTTCTTGACGGTGCTGTT        | CCATCTTCCTGTGCTTCC        |
| <i>SfruGR1</i>     | GGTAATCTTCTTCACGACTAC     | TCCGAGGTTACATTACAG        |
| <i>SfruGR12</i>    | CGACGGACCTCATTATCAT       | AACCAACCAAGCACTATCA       |
| <i>SfruGR2</i>     | GTATCATTATCCGCTCATATCC    | ATCCACGATCAGTTCTACAG      |
| <b><i>IRs</i></b>  |                           |                           |
| <i>SfruIR25a</i>   | CGGCGTTCCAAGAGATAA        | GGTCAGTCAAGGTTAGGTT       |
| <i>SfruIR60a</i>   | GTTATCGCCGTACCTCAA        | TCCATTACACAGCCATTCA       |
| <i>SfruIR75d</i>   | GGACACCACCTACAAGAC        | TGATTATGTCGTAGCCAGAG      |
| <i>SfruIR64a</i>   | GAATGGCGTAAGCAATATGT      | GAGGAAGGAATAGCGTTAGT      |
| <i>SfruIR40a</i>   | CATTTCGTAAGGCTCACAGA      | GCATCACTATTGTCAGAGGA      |
| <i>SfruIR100</i>   | GAGCGGATAGCAAGGTTC        | ACGACCACAACATCATTCA       |
| <i>SfruIR41a</i>   | ACCGTATGTGCTGTTAGAC       | TCTTCTACAACGTTCCAAT       |
| <i>SfruIR75p</i>   | TCATCATAGGAGCAGTTCTG      | AGTGGTGAGTTGAGGAGAT       |
| <i>SfruIR76b</i>   | ATTGGCGGAGAAGGACAT        | AGTTCTTCGTAGGTAGTATCAC    |
| <i>SfruIR75q.1</i> | ACATAACCAGACACCAGTAG      | TGGATCTTGAATGGAATGA       |
| <i>SfruActin</i>   | TACTCCTAAGCCTGTTGATG      | TTATGTCATGGTGCCGAAT       |
