# Supplementary material for: Identification and Characterization of Chemosensory Receptors in the Pheromone Gland-Ovipositor of Spodoptera frugiperda (J. E. Smith)
Source: MDPI journal article supplement (doi:10.3390/insects13050481), 2022-05-21
Supplement: s1 [file s1]

Table S4. Assembly summary of pheromone gland-ovipositor (PG-OV) transcriptome in *S. frugiperda*.

| Length Range | Transcript      | Unigene         |
|--------------|-----------------|-----------------|
| 200–300      | 94,890 (33.57%) | 53,990 (45.01%) |
| 300–500      | 77,422 (27.39%) | 31,919 (26.62%) |
| 500–1000     | 62,528 (22.12%) | 19,457 (16.22%) |
| 1000–2000    | 33,155 (11.73%) | 9,592 (7.99%)   |
| 2000+        | 14,636 (5.18%)  | 4,970 (4.14%)   |
| Total Number | 282,631         | 119,928         |
| Total Length | 188,846,354     | 68,151,470      |
| N50 Length   | 969             | 785             |
| Mean Length  | 669             | 569             |
