# Supplementary material for: Identification and Characterization of Chemosensory Receptors in the Pheromone Gland-Ovipositor of Spodoptera frugiperda (J. E. Smith)
Source: MDPI journal article supplement (doi:10.3390/insects13050481), 2022-05-21
Supplement: s1 [file s1]

Table S3: Evaluation of sequencing data of *S. frugiperda* samples.

| PG-OV    | Read Number | Base Number   | GC Content | ≥Q30 (%) |
|----------|-------------|---------------|------------|----------|
| Repeat 1 | 44,017,476  | 6,602,621,400 | 47.01%     | 89.61%   |
| Repeat 2 | 41,405,096  | 5,854,668,456 | 46.24%     | 89.47%   |
| Repeat 3 | 36,785,916  | 6,649,778,988 | 46.43%     | 89.94%   |
