# Supplementary material for: Identification and Characterization of Chemosensory Receptors in the Pheromone Gland-Ovipositor of Spodoptera frugiperda (J. E. Smith)
Source: MDPI journal article supplement (doi:10.3390/insects13050481), 2022-05-21
Supplement: s1 [file s1]

Table S2. The amino acid sequences of ORs, GRs, and IRs/iGluRs used in phylogenetic analyses.

**ORs :**

```
>BmorORco
MTTKVKVTQGLVTDLMPCIRLLQAAGHFLFNYHADTSGMNMLLRKYSSAHAVLIVVHYICMGINMAQYKDEVNELT
ANTITVLFFAHSIIKLAFFAFNSKSFYRTLAVWNQSNHPLFTESDARYHQISLSKMRLLYFICGMTVFSVISWV
TLTFFGESVRMIASKETNETLTEPAPRLPLKAWYPFKTMSGGGYVFAFIYQIYFLLFSMALANLLDVFCSWLIFA
CEQLQHLKAIMKPLMELSAALDTPNTAELFRVSSDTKEKVPDAVDMDIRGIYSTQQDFGMTLRGAGGKLQNFN
AENNPNGLTAKQEMLARSIAIKYWVERHKHVRLVASIGDTYGTALLFHMLVSTITLTLLAYQATKINGINVYAFST
IGYLVYTLGQVFHFCIFGNRLIESSSVMEAAAYSCQWYDGSEEAKTFVQIVCQQCQKAMTISGAKFFNVSLDLFAS
VLGAVVTYFMVLIQLK

>BmorOR1
MLLSFKDDSRSPDIQKPQNFQYMKILRFNLKIIICAWPEKQLNEIRSLGHSIHRVILPIQSVVCLACGILYIHFHFN
EIPFFILASTFITVMNMLATCSRTALVMLFERYLVLTGRFITVMHLFNFQKNSDYAYKLCITFVNRMSHFYTLVYLF
SMFMGLGLFNLPLLYNNYVSGAFSDPYGPNVTFFHSVYFAFPFDYSHNFRGYIIMALFNSYVSVTCSIGLVMFDLL
MCLMVMHVWGHKLKILSHNLINFPKPASHVITTPNGPTNVETYTEESKEVFARLRECIKHGTVDDFANDMSETF
GVILLVYGFHGVSLCMLLLECSDLSTKAMLRYGPLTLIMIQQLIQISIIFELLGSVADRIDPAVYQLPWECDMDVK
NRRVVYGLRRTQNPVRFKAMGMLDVGVTMASILKTSIS
YFVMLRTVAT

>BmorOR3
MIFVDDAVIGIKDPREYRHLRVLRTSLRLLGAWPGHYLGEEGSKYECAPMFLLMFIKIIACLYLTIVYLRNNADVL
GFFELGHVYLTIFMTFVTLSRGFSLTWPNYHKVVKKFITEMHLLYFKDNSEYAMKTHRRVHKISHFYTVFLKVQM
IAGLTFLFNVIPMYNNYRQGNYSRPNITYDLSIYYETFDILNTPNGYIFICVFNWFASYICCSFFCSFDLILSL
MISTVSGHFRIILHNLTFPLPEAITASKKFVDKHCNGNRSEFVLEEAKLYSPAEMWQVTDRLRQCIDYHRKLVE
FTGDISEAFGPMFLFVYYLGHQVSGCLLLECSQLNNTAALVRYGVLTVVLYQQLIQLSVIVESVGTVTGRLLKDAVYE
VPWEYMDTSNRKTVAIFLMNVQEPLHVNALGLAKVGQSMAAILKTSFSYFTFLRTVSE

>BmorOR4
MFKIIKNIIVENDALKQVEKPQEFQYMKWVQYHLKYIDGWPNDMDNKNVSKIRFHKRHLLVVEQTITFLSQMFYI
VKNYGKLSFFEIGHSYITALMTIVIFSRSVVTALGRYRKIARYFVSSLHLYHYKDISEYALQTHLLVHRLSHYYTV
YLISLVVTGMLLFNITPLYNNISSGVFNSPRPENMTFQHAVYLGLPFDYTTDIKGYFVVFILNWHLSHIAASYFCT
FDLFLSLIILHLWGHRLRIILNNLKTFFPKPYTNNSMYTEENQVVLLKLQECIRYHNFIISFTVMMSNVYDVVIVY
YLFHQVTGCLLLQCSLTDWESLSRYGPLTLIIFFQQLIQVSMIFEILGFLSDKLPNAVYSIPWEAMNVTRNKLQV
LLQKSQKPIQFKAMNMMSVGVQTMASIIKTSISYFIMLRTIARD

>BmorOR5
MLLYYPNTQVKEKVNNEEFTYIKFLKSFCKIMDFWPEREEKNSKTRIFRLRYILVLQFCFTLVAGVLYLTNSVGK
QTFYDLGHTIITVLMNVVSLSRILILRCFKKYDVVGQQFINKIHLYHYRNDSEYAMKIHTVVKISHNMTYIFSFCI
IFGTVTFNLTPIFNNGISDAYKNRPDPNVTLQQCVYYALPFDYTGDFKWWYLLVAIFNVQKTFEFTSLFILFELSLS
LMIICLWGHRLRIFIHNLNHIAPAPRNSFEYTKBERQEVDTLKKCIQHHTLIIGFVRIMSETYGLAVLIYYAFQQVV
GCLLLQCSQMELKTVTRFGFLTTLVNLQQLIQISVIFELLGYMSDKLQDAVYCVPWWEYMDTSHRKMVYMMFRQSQI
PLQLKAMNMLSIGVKTMVSILKTSVTYYLILKTVTTD

>BmorOR6
MKEEYYLQHPRTQLFYKVLAVSTIESTIDLTWWGYTFPKYVGWFYHLQCNVRLFGKCVVVSQILFIILNYQTID
KSVFIIAIIITITPLGALVGIIKAESAKAECYVNLKMFMDKVHIHSIYRKNENNEFVKKKVIQIERVSRFTAYFLVIL
IAINCLSWMLKPTLHNIKHFEIIMNKSMEFYIYFWTPLDYKYNLRDYIIHTLCIYLGATAVTVIIVTFDIFNFI
AVFHVVAHIQILKNNVKSNSWDDFNESEKKGYLVSILEYHAYIIRIFGEVQSAFGLNVASNYLQNLIEDGLFLYQI
MNGEKENVLMYGLMIILYLGLIFLSIVLEEIRRONYDLCEYVYALPWEGMSLENQKIFVVFLQRTQPDLEFETVC
GMKAGVKPAFSIVKSMFSYVYVMINSRF

>BmorOR7
MLLYHPNTQVEEKVNNEEFTYMKFLKSFCKIMDFWPEREEKNSKTRIFRLRYILVLQFCFTLVAGVLYLKNNFGK
KTFYDLGHTIITVVMNVSVSRILILRCFKKYDVVGQQFINKIHLYHFRNDSEYSMTKYKAVHKISNNMTYIFSFSI
FVCVVTFNLPVFNNGISGAYKNRPDPNVTLQQCVYYALPFDYTGDFKWWYLLVAIFNVQKTFEFTSLFILFDLLS
MMIHLWGHIRIFIHNLNHIAPAPRNSLEYTREERQEVDNTLKKCIQHHTLIIGFVRIMSETYGLAVLIYYAFQQVV
GCLLLQCSRLDLKTIITRFGFLTVMVNQQLIQISVIFELLGYMNDKLQEAVYCVPWWEYMDTSHRKMVYMMFRQSQI
PLQLKAMNMLSIGVKTMASILKTSVTYYLMLKTITANEA

>BmorOROR8
MSLSTRCLLKDFCKYVYYAGAGNFWYEDIYKETVPYKMYVVISFFTYTVMI FLENLAALFGKLPVEVEKNSAVMFAA
IHNIVLTKMFLLLYHKRSISKLNCEMAAVGENLEEASIMRRQFRKMRLGTALYFISVYLSLVAYGVESARRTIVEG
APFYTVVYTLPDYDNTTVLASFLRIFFYITWLYMMLPMSADCMPIAHLITMTYKFVTLCRHFDQIREKFQINVKI
MAKTEATEILKLGFIIEGIKMHQKLMYLADEIHRVFGIIMALQVCESSAVAVLLLLRLALSPHLDLTNAFMTYTFVC
SLFLLLALNLWNAGELTYQASLLSNAMFYSGWYFCDFEKDWCRRDIRRLVLIGCAQAQKPLILKAFGVLDLSYETFFV
SVARMTYSVFAVYKRGD

>BmorOR9
NVDNVEDFKYVKWLRNHLKTVDAWPVHSSKRKIQKRYVLPISFAACFISQTVYLNKGIGTSLSFVVLVHSHYICFLI
NGSCLCRGILIATERYKRLATCYLKTVHLFHHKNRSEHAMKIHVIVHRLSHYYTIYLIISLVFVGMVLFNFMPIYNN
INSGAFKSPRPENVTFOHAMYLALPFDYTTNIKGYFVVFIILNWIISLVTTSHFCTFDLFIISLMIHLWGHIIKILMC
SLEDIEGFVPGSSFKFTIEQNRKIYLIILQECIRHHQFTIDFTNEMSSTFGLVILFYFFYQVSGCLL FACMLTNES
```

LSRFGPMTFILFQQLIQLSIVFELISSLSENLPNAVYNVPWEFMDKNNRKM IQVLLQSQKLIQFKATSMNVGVQ  
AMATILKTSVSYFIMLRMTYQEH  
>BmorOR10  
MRTNAKSFLFVPSKVLTLGCVWPVEKTSIFSLIYRSIMLSSQFCFLVFNGIYIGLMWGD LKAVSDALYMFFTQTTC  
CSKAIGFYFNFMKIKRIVASMDDLFTAMSI EDQATIFSHSRTVNKLYKGVLGFTGFTLVQWTVLSLIGSRTL P  
NEMWVPTDISKSPNYEITFVVELWMMVISAALFMSVDTITVATMMFSCAQLDIIMKKTQQIQEIPLSPDLSSRNRS  
ELHEKNNGILIDCIKQHQAIVRFSELCEGTFQVHSFFHLGGIVFMICVIGFRMAGESPVSAQFWAALS YLVIILGQ  
LYLYCWCANELTTKSEQLRDKLYLTPWYDQDVKFKRNL CIAMECMAKALTFRAGSYIPLSRAMFVSILRSSYSYFA  
FLNQANEQ  
>BmorOR11  
MDEHSHFETSLNKKIKVLFKYSGMNLENTVTNTYEFNLHRWVYILNHAWTLAAVTFICIGISNGQNFIEMTCIAPCV  
AMTVLAVSKSFFHYINENAVKSLLENLIELERTDFERTKSVQRTEIVATEKQLLNMVINLVYLNC SMILVFDMT  
LIIIAIKYWTTNKFVRLPYLDIFVFPYKFEYWVMAYILQIWAECIVLLFIGAADCLFFTCTYIRIHFRLLQYD  
FERLTSSRRES DGLRDEDFRETYTNL VKRHQGLI ESSILEMIYSKSTLSNFVLSLVICLSAFNVTVI VVNDVT  
IVMTYLIFLAMS LMQVYFLCFFDMLMSA SEEVGNVAYNCSWYTEKASTGKDLLFTITRS  
>BmorOR12  
MTRITDVFSLNFI FWKFLGLWGKSAPS KYNMAYTVFYLFASLFVYDIFLTLNLIHTPRKLET LVRET MFIYFNHLVA  
VTKILMMFIMRKKILVIFDLLDCEEFKPDENSQEIMKRKTD FYIYWRIVAVTSNLSCFMLVIGPLIKMLIWKIE  
LGLPVCKFYFMSDEL RNKYFVIWYIYQSFGIYNQMVNNLNLDTFNCGMLWMAVGQLQILKTKFVNLKLNDFENGLD  
LKS RDDMQIERLRKYLTHYEIILKYCATVQDILNITIFVQLGMSSIVICVGLCGFVAMP SNTETAIFMSSYLITMT  
MQIFVPWSWMTQISFECGELMSAAYCCEWIPRSKLFKRSLILFVERAKTPVRITGLKIFTLSLDTFTSIMKTTYSF  
FTLIRQLQVDEVN  
>BmorOR13  
TSRPYKFFNILRLCTMAPKQIDCFEINWKFWKFLGIWSENKPHRYYKYYSKIFITFFVILYDVLYTINFIYFVPRQL  
DLIIGEMLFYLT ELSVL SKVFTFIIMRHKLKIF EILES DAFQTDTEBELKILHRAKVFIKRYWKIVALVITANL  
THISSPLLKNLIFKVELVLPVCSYSFLESF LKTFEYPLYFYQIVGIHFHMLYNLNIDTYFLGLMILIIAQDLILN  
VKFRNLKSGKDHTQLNESIMGLNKNLDHYNEIERCVLKH DYYYNP I PFYFNKQOTS RICLICILQSVPEYIIFLA  
TYMFIMI IQIMVPCCFGSRIMDKSILSSAIY NCDWTSNSKDFKINMRLFVERANKPLSITGGKMFSLSLATFTS  
>BmorOR14  
MSNYIFKPFHETYRIITFTMIAAMIYPNPATEKRRLIYIGLMLLSVIPLAFMI VTEMYEFFMASDLNNTIRHSTVI  
GPFIGGFVKSPFFEIMFVYTFSSFIYIIN YVG YDGGFGLCINHA CLKMKLYCRALEDAMRSDSRRHEKIVAVIEE  
QRRTYEYIALIQDTFNIWLGLIYVATMIQMCTCMYHIVQSFNIDVRYIIFVISIIHIYLP CRYAANLKCMAAETPT  
LIYCCGWESVSDLR IKRMPFMVARSQVIVEITAFNMFAFDMELFVWIMKTSYSMFTLMRS  
>BmorOR15  
MMTLVYQTDIFKPNVFFWKMFGIWADRKSSKTYKYYSFVFLFITLIMYNSLLAINLLYTPLKIELLIREVIFCFTE  
ITVTTKVLMLFKRNKILDAFDLLNKNEFRGNSEESSAI IQKNNSAYKTYWKLYAILSNFAYSSQVLGPLIVKLIW  
KTKLELPICNYIFLNEELRHDFFSGWYIYQSFGMYGHMMYNVNIDTFISGLLMMAVTQLKIIQTKLLSLKLNPRER  
KMDRGLMNI TEVLKLNELKHYELVLKYCSTVQSILDVAMFVQFGVASAICVAMCGLIMVRSS TETLLFMVTYLF  
AMTLQIFVPAWMTQLH FQSQELVFAAYNSEWIPRCQSFKRSIIIFVERAKIPITITGLKMFPLSLATFTSIMKTA  
YSFFT LIRNMQTLQEE  
>BmorOR16  
MPVSPERSPHYHLGYSFQLVTICMSAYMYFGVDSVAFSSVIFGCAQIGVIKDKIMS IKPLGIYRNHKTYTNISRYN  
RKT LIECVKHHQAVISFTELVEDTYNSYLLFQLVGSVGIICGLAQCPITIPAILCYLSVMISQLFVCCWCGHEL  
ATSEELHTILYNCAWYDQDVKFKRDLNFMMARARRPILLRAGYYISLSRQSFVSI LRMSYSYFAVLNQTNK  
>BmorOR17  
MREDKMEINNSQKFYTKMIFRYLYSVGLGDWWYQHEDRSDSHRKL YCLWAVISNAYIFLNICNELLANFRKDLTDV  
EKNDAIQFSFAHPLIFAKIASFFFNRRKKIREVFGRLLEENRSVYSCGELEKESMKQIKRYSLAFIGVSYMTLMVST  
IDGLRAHFKEGIPIRTEVTTYPPSPSNSGVIVNILRFLVEFHHWYIVSVMVAIDSLAVASFVFTFKFKLLQRYFKD  
MGLTVRRDQSNMTDEALADKFRRDFIVGVKLHENALWCAENVQKAFGWVYSVQVFETVALLVMCLVKLVTTNHNMI  
FLLANFAFMLCV IILNGSYMPAGDVTYEASEVPTSIFLCGWELVRQTDLRFLVVVAIQRSQVPVIMKAFGIMTLS  
YSNFIAVSLFKFYVQFQINLF  
>BmorOR18  
HFFDFNIKYL FVYGLWPSNEAKRIEKIAYKIYEYQLHVLSLIFLVTTGIGTYKNHKDIIALLTNLDKTLVAYNFVF  
KVIVFVYKREELRKLIEQIVQSGDQITEDRKALMAKLVIVLTGISTV IITAFSCLALFEGEMTIDAWMPFDPMSK  
MNLFAASQILAATFVVP CGYRAFAMLGIVCSLILYLRDQLVDLQNKIRDLRFATGNVEKLRDDFKLIVKKHVRL  
>BmorOR19  
MHEFVINQNETTKLYDQLNIILYILGLQGIWVDEIKLSRRFHVFFKVVTFILHIMCGMFAGLQFFAIFTQNSLNS  
QQKSDVIVIGISNP MAYIFCINFIRNRNEIKDLFYHLAVVLKIYYNDVEIEKSMVNKIKSYLSTYVFASITILVSN  
GIIA FQTINSDEPFLGII TAWPDKTDTSKTASYARIGFYLFWCIHFFRISTVFAVIVCILISIKYQYKFLCSYFE  
SLNKIFDDETSSHEVKEAEFENAF CNGIKIHTQIIWCVRR CQIMCRTVFSANIMLDTFVLVILMLAMVNSENDFYG  
LCSQMSVVLVTVVLMAFFMWTAGDINVQASQLPDAIYSGSWYNCRGKSSARISLVTISMNKAQQPILMWALGFVE  
LSHKNFVAIIKSAYSVFSVFY  
>BmorOR20  
MIQASKYPNSKTKELFRKIAHAIYICGLPNFWIEELNLPKSFIRVYDKIVRIFNVATYFFLGIEBIAAHFTQHHLTN  
KQKFDLLLYSISHPI LNGYGVIVSRQGVNKKVLLDLVINLKVKYNDPVIEEAMIKISMTYSVSFITNCVLSMLTY  
TFDALLMVYKKGVTFNVIITAWPDVEDTTTEASIGRIGFHI FWWLFVTRPFVYVVLVINLTTCLSHQYMNLSQSYFF  
HLEDIFKENLSQNEKEAKEYAEYKIGVMLHANTLRCTRCHMVWNGVMGQIIFNISLIV IMAQMMPFLSAPVSS  
CGMLVTSQFRSVHRFYASRLATAMYCSGWQNCRGKSSVSIRNMVMNTIAVAQ

>BmorOR21

MNKNMNKNHYILKTYCDKIFLVGSGNFWYQKTESRNDKTLLYKIYSCVLFPTYGFM TVLEIMAAMMGDFPEDEKRD  
SVTFATSH TVVMIKFISIIKNKELLKTLNRKMMMICEAHEEQTLMDEMYRTVKINVVAYCVAVYGSATFYVFEGLR  
KFYNGSHFVTIVTYPPSNDDDTLAATIVRIATTVLVLLMMLLTMIISVDTYTMAYLIMYKYKFITLRHYFKRLRENV  
DELVAAGKARLAAEKLAQGLVEGIKMHNELLSLSKIDDKAFGTVMALQLCQSSGSAVSLLQLIAVTMYLLLLALFLC  
NAGEITYQASLLSDEIFYCGWHKCNSPVLSTQRNIRDIVLIAILRAQSPLVMKAFKMVVRSTYSVFALFYAQNK

>BmorOR22

MNKNMNKNHYILKTYCDKIFLVGSGNFWYQKTESRNDKTLLYKIYSCVLFPTYGFM TVLEIMAATMGDFPDDEKRD  
SVTFASSHTLIMIKFISIIKNKELLKTLNRKMMMICEAHEEQTLMDEMYRIVKINVVAYCVAVYGSVTFVFEGLR  
KFYDGSHFVTIVTYPPSKDDDTMLASIFRIATTVLVLLVMMLSMIISVDTYTMAYLIMYKYKFITLRHYFKRLRENV  
DELVAAGKARLAAEKLAQGLVEGIKMHNELLSLSKIDDKAFGTVMALQLCQSSGSAVSLLQLIAVTMYLLLLALFLC  
NAGEITYQ

>BmorOR24

MPEELFLDRSIIKIESYFRWMGINIRSGDNNNKDVKIRCIYFINFVLLNTDVLGAI FWRFRSGLEQGKTFTTEVTY  
NAPCLTFSFLANFKMLSLIFYEKTVHELIAALQKLEIKHFLRQNCAEELKMLKDEKNFLHAVFKGSKI VNYASILT  
FGCSPLVLIASNYKYTGRMDYLLPLIVLYPFDVDNITVWPIIYVRQIWSVITAVIGVCATDYLFTYFCVYISTQFR  
LLGHSIERVVPNNGLSVRTRLNGLNLRMKFVENLKWQHQLIRAAASLLEQIYTKSTLYNFVTSSV IICLTGFNVAVVE  
DFAVILSFLGLVQTYLLCYGDTIMCSSTEVSDAVYNSTWYGTNISQMRDYL FVMKRAQKPKCLTAYGFSDVNLRTF  
VNLRAFMKILSTAWSYFALLQSLYSSHE

>BmorOR25

MFEEKALRSANFYMRVIGIPTDIRDGNRTLMERLNRWFYCINFLWLNTD VAGEITW FVKGLLNGSSSTLIENTYLI P  
CLTLCILGNVKTFFTIKYANHIIDLVAILKDLEIKNNAARKNETEIVKERL KFLTTSNKFLLFVIGTGIIAFGIGP  
LMLTASIYFSSGDMKMLKLPFLIWIYPFDSSDIRYWPFFVYHVQVWSACIACCAVYGPDCFYFTSCTFIHIHFIHLQND  
ITNVIVESSRARKNGLYRGCHQAFLELTNRHKDLIRCVNLEI IYKSTLVNVVSSSLICVTGFNVMTFCWFAA  
PFASFALGLVQTYLLCYGDTIMCSSTEVSDAVYNSTWYGTNISQMRDYL FVMKRAQKPKCLTAYGFSDVNLRTF  
SRILSTAWSYFALLITIYRGNGQQ

>BmorOR26

MSTGSAAGDSVAPHLRRLRQVGFCQLDPTSQSRRPILALMHRVYHRLVLAATVLYIFEQLTYAYQARNDMERLSRV  
LFLMLCHLTCTIAKQFVFHSDADKINQLVVGLD DALCNQPVETHRLLLLETSRRAARLLMLYSGCAVSTCILWAVFP  
LLDQLRGRTVEFAFWIPIDYRHNAFQFAVVLAYAFYSTSLVAVANTTMDAFIATVLYQCTTQLRILRMNFESLPER  
AYALSRKTRQDYHTVTHELLVDCLLHYKKITETCNLLEQIFGKAILVQFVGWILCMAAQI VDL SVLSIEBFASM  
ILFISCILTELFLYCYGNEVSTESERLVTSIYSMEWVGARLGFQ RGLLVLLERARRPVRPAAGLVIPLSLQTFLK  
IIKSSYTFYAVLRQTK

>BmorOR27

MPSSFFLPNLENPDYPSLGPTLKGLKYGWMWQSGGIKRILYNSIHAFATFFVITQYVELWII RNNVELALRNL SVT  
MLSTVCVVKAGTFVCWQKYWSGII GFVSNLEKEQLSKNDAATQAAIVKYIKYSRRVTFYFWSLV TATVFTVILAPL  
VGFLSSPERELIANGTLPEIMSSWVPFDRSRGFGYVWTALVHTLICFYGGGVVANYDSNAVV LMSFFAGQM KLL  
SINCSRLFDDGNEVISNNEAMKRIKECHYHHVYLVR L

>BmorOR28

MHTLALVFALLYPSNCNIIKRAIGITLIIALS GQG LFWCMYTFKCVYELSI FNFARNNSSNNLFFFCSSVIFKTM  
KYCVILVKISRHFLKGNNDLGEDYKIVYKEYNKTHDFKRLMVHEMKLYFEDIQSVGPPPHCFMFAYNFLQVCVLIL  
NYSGFDFGSFCIASIRLCMKLKL VVYKVQKAF AESKSVSELKHQLNDAIKDNLDALKFHEQIQNVFFIALSFDVKFS  
SLCVFGTLLVFLPCHYASNLT K

>BmorOR29

MFDFLQNLEDSE RPLLPNFWL INKTG LLLPKTNFGKLAYILVHEIVTFFVVTQYVELYVIRSDLDLVLTNLKISM  
LSIVCIVKVNTFVFWQTSWREVLEYVNEADKFERNQTDETR GKI IETYTKYCRRLTYFYWSLVFTTFLTNTPLM  
RYWSSPIFREHLRNGTEDFPHIFSSWMPFDKNHSPGSYCTIVWHVLLCAYGAA IMAAYDTCIVVIMVFFGEKLNLL  
RERCKMLANDLYNHAFVIGQLHDIHVQLI

>BmorOR30

MSVSNLKFEVLFKPTTMSLHMNRSHPSIKRNKIWLLQFISLMTLTVFCATGLITSLLFHD LKFGKYMEASKNGTIA  
MLSFTTTTFKYSLLLYLQKSLNRLIAKIDMDYEIAKGLTPQEKAIVLNYAKKGVIVSKFWLFTAFAITFCFPLKAFI  
IMGYRFFIKNEFRLEPMFDMTYPEPIESYKTSFPVYFILFVVFFLFGCYASSL FVAFDPLVPIFVLHACGQLD LLS  
LRITKLFSDTKNPRIIAKELKVIISKLQELYGFVNFIKVNFSILYEYNMKITTI SMPLSAFQVVESLRGEFNIEF  
TYFFFGCILHFFMPCYYSNLLMERSENFRFAIYSCGWENHNDKNIRQMLLFMLTRATEPLGIATVFTNISLDTFAE  
MCRQSYTIFNLMNAAWA

>BmorOR32

FRKSLRGSQEEPRANGKSENV RFLINSHILHCGLRFNETNCHTHYIAKVAIFCFIVTYMLQVMELYWSKG DQEKLF  
ECFSILSFQCMGMVKLVILRVYHQRWRFLLNQVSILENRHLDPGPLSYDSNDNDNDNEIVTFITKYTDKFKRTSSI  
LIKMYASTLVIYVLSPFVEYIFRQFRGDLNIAYPHILPAWTP LDEF SVTGYLIMVSFETVACIYCVFVHVAFDLTC  
VGLMIFACGQFYLLRYSERIGGKGRICRLKSTEVRAHYRIVFCHGIHVLLV

>BmorOR33

MIYYRKCKMELNFDKIFKIAII SQKFSGYTPYTKRDKKWATHFILMHGELTII CMLFIYNIIEFDLKAADYSQMCR  
NMCLSFVYMVITLLYINMLYYQSKLMLIETMKA EYELAKTMSEEEQN VILEYAKKGRWLCRAWAILTTCGMAQFF  
LKSIVCTIYSAIQGNFRIVQYEEVICPEVIERHRNNPVIFITLYFCTFFYSLYTSALYTSVLP LGP IFL LHGCAKL  
EIVRLNIKNLFDNDYVQERLKKTVLQMQDIYCYSHEINECFQILYEFL LKATSLVLPITIFAVIQALGRGQFIP  
EFFAFIFGAFMVGTTPCYYSNMLMEKSEDVRMTLYSCGWETRFDLNTRKCIILMLCRALRPVSIRTI FRSVSLTTL  
TDVFQQAYALFNLLNAVWN

>BmorOR34

MIYYRKS KMELNFDKIFRIAIISQKFSGTYPYTKRDKKWATHFILMHGELTIICMLFIYNIIEFDLKAADYSQMCR  
NMCLSFVYLVITLLYINMLYYQSKLMLIETMKAEYEIAKTMSEEEQNVILEYAKKGRWLCRAWAILTTCGMAQFF  
LKSIIVCTIYSAIQGNFRIVQYYEVIYPEVIERHRNNPVIFITMYFCTFFYSLYTSALYTSVLPLGPIFLLHGCAK  
LEIVRLNIKNLFDNDDYVQERLKKTVLQMQEIYCYSNEINECFQVIYEFLLKSSSLVLPITIFAVIQALGRGQFI  
PEFFAFIFGAFVVGTTPCYYSNMLMEKSEDDVCMNTLYSCGWETRFDLNTRKCIILMLCRALRPVSIRTIFRSVSLTT  
LTGVFQQAYALFNLLNAVWN

>BmorOR35

MKLWQSIREFGLEYCDLPTTLQNVASLLRAITLNIIDSRHTARIPFICYVMTVVITLSYFYVFLVSMWVFWVRSAB  
TRDYLAAMVVLVLGLISSEIGTLKFFYTFIYIKKVQIRIVREYLECDHMVVPESRFADNVLTMRNVKKRAILYVWVV  
IGNGVVYVTKPLFMSGRHHMEDRYIVYGLEPMPFESPNYEVAYFLMMFGLCFICYPPANVTVFLIVVVGYTEAQMIA  
LQEEMLRIWEDAVAHYNNKYHTVGALTNSSEKNKIINQVVKFRLTEIKMHTTNIQLLRQVEFVFRSAIAMGYVFL  
VLGLIAELLGGLENTYLIQIPFALIQVLVDCYTGQKVM DASSLFEQAVYDCKWENFDKSNMKTVLLILQNSQKSMRL  
SVGGITVLGFSMMMSVMKSIYSAYATLRTTMS

>BmorOR36

MVFNSKKNIIISLFSLLEDSRHPSVSGPHLRLLSLTGIWYPN SKTNITLLKRACFYVIVLFFVSQYLKCI IKFKIDSL  
QLILEYAPFHMGIKTCFFQKDYNVWQDLVSFISKTERDQIAKKDPKSIKTIQSYISNRNKITYSFWALAFIANIG  
VFSKPYQNNQSDVNGTVTYNHLFDGYTPFSEEPGGYYSFGIETILGHVVSFYVLGWDTLVVSIMIFFAGQMOMSR  
LQCSRMINGSPERTHKNIKCHKFHTDLIKYQKQFNSLISPVMFVYLFVSSINLSVCIVQIAEIEDDFATVLSSFI  
FLLACLIQLLLFYWHSNEVTVQSELVSYSTFESNWTSTQNKLQKEVALLGLTTSKTLVFTAGSFNHMTLATFISVS  
LTFELFELID

>BmorOR37

MELGCSRHLKLPCSLHPIGISKHGNTLSELLIYFPAIPKITYAILAVLLTVYYYIYLC SITWVFVRCPQTGD LAA  
ASIVFSLGVSSEIGA IKLFI IAKLRDITGEYLQCEADMAPGRLRARVGRSLRTVRRRAFVYWLVLVNAFAYDLMP  
AFLPGRHLSDEDV FVIYGFEPMPFESP NF EIASTLMGVS VVFI CYTAGSISAFIIVIVGYSEATMLALSDEISCVWDD  
ACASECQPNDFIRARLGKIVAIHTKQIRLIREVEVVFRLAGALAGGFACVAFGLIAALLGGLENTFLQLPFCVQIS  
VDCFVGQRLRDANVAFETAVYNCKWEYFDKSNMKTVLLILQNSQKTMGLTAGGVAALDFTSLMTIFKSVYSGVHHS  
QTDD

>BmorOR38

MNLSQSVNEQANEYVKMRLERISKIHSPLPFEDIQDFRELCCIPLAVYAVTGSITASYVYAFLISLLWFLFARCT  
DIPEDQVAMVVFSLGISSEIGSTKFFNSIIYIKELRKLFDYLLYDATCPAQGRRLHLHLLTTRYVKRRAIIYWL  
VIGNGFI FAIKPLLVEGHLAQQDDLVLIGLEPMRQSPNYEYAYAIMTMGVCFICYPPAHVTMFLIIIVGYTEAQML  
ALSEELKHLWNDAIEHYEKHSRTEREADAAMKSKILNSFVNFRVLVQIIKSHSTNVNLIGRVENVFRGSLAVGYVFL  
IVGLIAELLGGLENTYLVQVPFALIQVAIDCFIGQRVNDANIDFEKAVYDCKWENFDKRNMKIVLLLLQNAQKTVSL  
SAGGI AKLNFSCFMSVIKSIYSAYTTLRTTMK

>BmorOR41

MMGNSTDLFLDRTKSILNFFAMWRSFEKPIPLKVYMAFIMTTQYLFLIFEIYIVNVWGDMAEVSEASILLFTQAS  
VCYKITSFISKTNNFVILLGLIESEIFSAQTELHEKILILKARKIKRLCMFFLVNAVTTCSLWAVIPLLDISSKML  
PKFIWMPASTGESPHYELGYLYQMITYISAFPLIGVDSVPLSAMIMFGCAQLEIIMDKIGVKSRPLDQQPMQRQA  
VLNSNYELLVECVRRYQSVVRFIELTEKTYHANIFFQLSGSVLII CNIGFRIAIVDSNSLQFYSM LTYLV TMLSQ L  
FQYCWC GHELTIRGEELRETLYQSPWHEQDIRFRKVLIIITMERMKRPIIFKAGHYIPLSRPTFVAILRCSYSYFAV  
LNRVRNE

>BmorOR42

MDIPKFEELLKQIQMNFWMGIPFDNPKIQIRYYVLLLTLSLMLIDEIAFFGSRMSSENFLELTQLAPCICIGVLS  
VLKILALTAKRQKIYELTQNLECLHKIILNDTRKTELVRKNLVLIKFITKYFFVLNAVLI FVYNFSSPVI IAYNYI  
VSNEVQFVLPYAVLLPFKTD SWIPWLI VYVYSIFCGFTCVLYYATVDVLYCVMTSLVCNNFSLISFKLQKVRNRTA  
HLLKEVVKEQQYVLKLAEDLENIFTAPNLFNVLIGSVEICALGFNLMIGDLTQIPGCILFLSSVLLQILIMSVFGE  
NLISESSRIAEAAFLCKWYEMDQKSKTILTIMIRSHKPKKLTAYKFSIISYGSFSKIISTSWSYFTILRTMYTPP  
GTKFQDDL

>BmorOR45

MKVLDNVNHAVKVTMNCRLYGLFVSDDLTKRQLIIMRAFSLMLYLFFVGGFITTTQSALIIITMWGDLNLMTNVGLV  
LGTHLTLSAKVFTLHYKEKEITNVIYKNEVRLRAETREQKYIIISEMNRETTLMRLFI PFGMGTVTAWLLCTPKG  
ELYTPAWYPCNTTKSPAHEIILAHQGI AVILTATLEIAIVLLMTSIVAVCRCLKLVLGSLFETICDDLPSNIMNKL  
TADEQVIVAKRVRENVIEHQAVLECIINDIQDCFSSAMLVHIAISTMII CATAYQLAVEKSLDLTQRMTMASFLGGM  
STEI FLFCYQGGHLSIDSMEVATAVYSCPWYTFPTSLKRSLLVIMIRAQQPALLTAGGFAPLLDFTVSI MKASYS  
FFTVLQNAS E

>BmorOR46

AATYVQIADLIDIWGDLDLMAETSLLLFMELAVISKILTIFIKYDKIMEIINGTEDILCSENRLLEGQKIIASIDKE  
TTRFFQYTTSSVIFTTFFWFLGEHSSTFFIRAKYPF NELKSPGYEFALIHQCM MVFTGYFEFNINIFFASVVAGC  
RCRLKLVALSLRNICINIPVNKKNLITPEEEKLITERLHCAISQHKYALDAAEDVKHCLSKVLLVQLTVSIVI ICT  
TAYQMAVVRILYWWQEKINYYASLT MAGYLF GTSLEVFLFCYQGEFLRESSEEIADAAYECPWYTLTRPLKKTLLI  
IMTRAQRPATLTAGGFVTL DITEYMAIMKASYSFFTVLQQVSE

>BmorOR47

MKLVDNFIFALKVTLNWCRYFGIFIPDEL TGRRQKLLVQAYSVFMFMLFIGFFIITQIILFILVWGDLSLMTDVG  
LVLGTNLALSAKIAVFFFKREELASILKKNDDTLRFETREEGKKIISEIDRETNAFMKVFFCFGVGTVIAWFLSTP  
KGELHIATWYPCDTRKSPAYEIIIMIHQLAITADLLMLSIAVCRCRVKLVGLYLQ TICDDLPCNVKNKLTSD E EVI  
VAKRIREYVIEHQAILDCISELQNHFS PALLVQLLTSVVIICVTAYQLAVEKSSDLLRKFTMASFLFAMSTEMFTF  
GYQGGHLSHDSMEVATAAYSCPWYTFPTSLKRSLLVIMIRAQQPALLTAGGFTTSL ETFTVIMKASYSFFTVLQ E  
ATD

>BmorOR48

AAACVQIADIIDIWGDINLMAETALLLFMEFAVISKILTLLRLYDRIMEIINGTEEILYFENGLEGQRIIASVDKE  
TTRFLQFNSAFVVLSTTFWFTGEHSSTFFIRAKYPFNELKSPGYEFALIHQCMVMVFTGYTVFNINIFFASVVAGC  
RCRLKLVALSIRNICINIPVNKNLITPEEEKIVKERLHCAISQHKCALNAAKDIKNCISEFLLVQFTVSI I I I CT  
TAYQLAVVCLFQNKAIIGNIQKTSMFGYILGASLEVFLFCFQGEFLRNAVRDCEEIADAAAYECPWYTLTQPLKRTLL  
IIMMRAQSPVILTAGGFIDLSIREFMGILKASYSFFTTLVQVSE

>BmorOR50

MPSLLKTESLALTLTLNLSWAGLILRDDYTKTQRIIMKVYGGVLVFLYLVFTAYVQIADLVVIWGNIDFMTETSL  
ILFMQLAVSAKVLTLMMLKSKKIMEVTNEADAILNSEKKVEGQRIIASIDKNTTLFLKYYGFFVAFTIICWFMGENT  
STFFIRSKYPFNELKSPGREFAFVHQCI VVI FTGSFDFNVDI I I I SLVAVCRCRLKLVALSLRNLCLDIPMKNRNL  
ITSDEEKVITERLRNII SQHKRALDAAEAIKHYLSGALLVQLMVSIVVICTTAYQLAVKKSTTMQSLTMAGYLFGT  
SLEVFLFCYQGEFLRESSEEIADAAAYECPWYTLTRPLKKTLLIIMTRAQRPATLTAGGFVTLDDITEYMAIMKASYS  
FFTTLVQVSE

>BmorOR53

MALKKMLALTKGLEDPTHPLLGPTLKALSVFGLWQTGSQKSTVIYNTFHFLTFLFVITEYIDLYTVRKELSKMLNN  
LSVTVLSTICMIKTL SVYCRQSHLKVLRREISELELELMKTTDKNIVKRLRQYTVYTRAVTVYVWFLVVGINVVLL  
TSPLLYASSEIYRSEIKNGTEPPPLILCSWFPPDSARMPGYFWATMVHIIMSIOGCGVATYDMNAVAVMSYLKG  
QTSILKDKCAIFDETTASSRDVLRNIRDCRHHNILLRHYMYMNSLLSPIMFVYMLICSFITICCSI IQLDSSETTI  
SQRIWIIQYSIGQISQLFLYCWHSNEFAAKVKKKHFPFLFPINLF

>BmorOR54

MGLNTIKEFFVNVRKRFQDVSIDSLLWIVNIVPSLAGFSIRSDRVSAFPWIVHWSLLVYVYAVGNAVYQWKFANEA  
IDYITSFINVSLILILIGNNSWWFLANRRLLKSVLHKIEVNDELSRRSEQSRLKHKKLLKIIKRIVLVFYMSNYVNA  
SFIYLPNRVDVLNNYAMTPCVGMEPLTVSPNRELCLTILCMQEFISIMTVVLNFQALLLCFIAHTAVMFQILADEIM  
ALNNYENLEEHAQYVKEMLP I FVKRHSLTLSAVDNYKSLYSVPLGVNFGSNALTILLILYLPVLEWFKFPIPIFVFC  
FMLFFLYCFLCQKLVNASEAFETAICYCGWENFALREMKMIYVMLHQAQKPVELLAADIVPNMNTFATTLQAMYK  
FVTTVKF

>BmorOR55

MCFLKIKQQIIDIQKHFKDYSLNGSLWIVNLLPRLMGFNLRADKVGVFVFTIYIILLVYVFGIGIFVYLWKHVDTM  
SGLMKSYLNLSLILVIVNNSCWFLSKRSLLNKVLKKIHLIEDLSCSEHEHALAKYRRVFKIVTHLLASYLVFYFTE  
IYFMFLFRNYDLLEDYSLAPCVGLEPLSSSPNSEICLIIVLIEHFIISTVMMSFAALFLVLIHTAVMFVLAEDM  
TKLTDLNLADHRKMIRESLRSILHRHSLLLQIVYELRLLYSVPLGINFISNAMSILVLLCLPIHEWPSFLHIIGY  
CFFAFFLYCFLGQNVINASEKFIDAIYCCGWEHFGVAEKKLVHVMRLQAQKPVETI IALGMISVNMNTYVEALQLIY  
KFVTVLKI

>BmorOR56

MKLEKLEDPDRPLLGPVVKALKFWGLLLPESRSKKYFYLFMHFAVTVFTATEYIDVWFVKSDDLALLNNLKITML  
ATVSVLKVTTFLLWQNAWRDLIGYVSRADLEQRATSDSRKLALINGFTGYCRKITYYYWFLMYTTVAIVTVQPIFK  
FSSAAAYRLDVQSGNGTYLQVVSWSIPWDKNTLPGYLLASIQTYAAIYGGGWITSFDTNAIVIMVFFRAELLELR  
IDCAALFDDEKSFQDMAPMRRLKECHRRHTELVKHSRLFDSCLSPIMLLYMFVCSVMLCVTAYQITIEETNPMERFL  
MTEYL VFGVAQLFMYCWHSNDVLYASQDLSRGPYESAWSRDVKYRKNLYILVAQFNKIVIFSAGPFTKLT VATFI  
RILKGAYSYYTLLSQSQMNKT

>BmorOR57

MPSLIKNRIFGLTLTLNLSWAGLILRDDYTKTQRIIMKVYGGVLVFLYLVFTAYVQIADLVVIWGNIDFMTETSL  
ILFMQLAVSAKVLTLMMLKSKKIMEVTNEADAILISEKKVEGQRIIASIDKNTTLFLKYYGFFVAFTIICWFMGENT  
STFFIRSKYPFNELKSPGREFAFVHQCI VVI FTGSFDFNVDI I I I SLVAVCRCRLKLVALSLRNLCLDIPMKNRNL  
ITSDEEKVITERLRNII SQHKRALDAAEAIKHYLSGALLVQLMVSIVVICTTAYQLAVKKSTTMQSLTMAGYLFGT  
SLEVFLFCYQGEFLRESSEEIADAAAYECPWYTLTRPLKKTLLIIMTRAQRPATLTAGGFVTLDDITEYMAVSLISNT

>BmorOR60

MVRPCRYFAIHFIILLRFLGLGWHPHENETRNYPGLYLYYSILTQLVWVVLVGLGETIDPFVGEKMDRDMFSL  
FVITHDLTLIKLYIFYFRNVEIQDIVRTIEIDLRYRYQNDDKIRATIRISRIFTA AFLFFGWVTIGNANIYGIVQD  
LRWKDIVKNLNETTSKPLRTL PQPIFIPWPYQEDKH YILTFILETMGLLWTGHIVMTIDTFIASVILHMSTQFAIL  
REAI VTA YDRTMIALSEGALQSGVLCENSGNGEENNQIFLESFYKHEHIESVLESTLLSCIRQHQLLIGCVEKFSK  
TYSYGFM TQLLSSMAGICVVMVQVSQGASSFKSVRLVTSLAFFFAMVIQLAIQCFTGNELTIQAERIADAVMESKW  
EKMPVRLRRLLLVTMMRAQRPLHLTAAGFAYIDNTCFLSILKAAYSYYAVLSQKQG

>BmorOR63

MKLWIRNANFTISLSLTLLRCLGFWSPDGLAGNKRLLYNCYSFVFFMFLGIIYILIQVVDMIKIWGDPLMTGTAF  
LLFTNFAHATKVINIVIRKNRIQRVIQQANAVLMGVQSEEARIVKSCDFETSIQLCLYFLLTFVTTVGWATSAEK  
HQLPLRAWYPYDTSKSPAYELTYIHQVAALLIAAYINVAKDSLVSLLIAQCRCRLRLVGLALASLGQDLKIDYQSQ  
LSPAQENILNLRKTCVLEHQTVLAAVTELQACFSKPTFAQFTVSLIIICVTAQQLVSQGTGNLVRLLSMGTLYLMNM  
IFQVFIYCYQGNKLSVESSEIAGSVYFSPWYLGSVKLRRALLIVMVRSSRVAKLTAGGFTTSLASFMAIKASYS  
LFTLLQVQKQK

>BmorOR64

MGVSNRGRTVKPFLYPLVDELVDYNLIVGVHLPFEYKTPSRYPPLAYITVVI AF IYVSYFVMVTDLIMQAHLLHLLCQ  
FNVLADCFENMLNDCVKGFEGPLVSLHEYIHLIDEFEYNLMVGLRLPFSFDTPLRYLFTYVIVLIAFNHTAHYVM  
VTDLIMQSYLIPLICQYAVLADCFENILIDCSNDYGDHARRNDIVYSRSMELRAILSRPMLGQLASSGLLICFVGY  
QATTSISVNIVKCLMSLFYLGYNMFTLVVVCRWCEEITNKS LNIGNAVYCSGWESGMTVVPTRSTILLVILRANK  
PIVFTAGGMYNLSLTSYSLVKGSYSALTFLRLRIQHE

>BmorOR65

MRLGFEVSISEYLYRNIFYIYTLFHILLHFYIILHMIKLDLEAIFDDIDESVALLPHRDTRRIEVQKILNGRMKRV

VTWHISVFKAVEAVSSIIYGPPPLAYQVMFTSIAICLIAIQITQKLENGILDIRFTMLGVAACLQMWIPCYLGTLLRN  
KAFGVGEACWNSGWHQTPGLGRMIRQDIIIVLLRAQQPVTIKFPGLQSIQLETFSSVIFNLGYYYYFLLLRWVDELT  
AHLVLSGYWSP

>HarmOR3

MTLSVLDRFYLIIDGGFFSFNLKYLFFVGLWPEKTLTRNQKILYKMYEHFISFLTTFIVLAGIGTYQHKDDLVVVF  
CNIDRCLVVYNFFFKTIIFFIKRNQLRDLIDEIEMSGDEVTEERKKLMANYVMFITGVTAAVIGAFSLLALFEGTM  
SIEAWLPSPDPMESLMNQILSLEILAFCVFPGLCRAFAMQGLVCSMIMYLCDQLIHLQKELRDLTYVKETEMVMRTK  
FKNAIRKHIRLMGYSGRMENIFKEYFLVQNLAVTVELCLNAVMMTVVGVQQITLLITFLAYLMLALVNAYIYCYLG  
NELIIQSQGIALAAYESTWTSWPVDLQKDLLIVILAAQRPLKLSAGGMALLCIQTFSQALYNGYSIFAVLNDAVN

>HarmOR6

MSFRKFLFENEAVDGIKSPSDYLYIKILRFTLDVIRSWPRKELGEPESASFTVFMKYFYLVLTITATVVGSILYVVV  
HVSELSFLEAGLMYLIIILMSFLDALTVMSLTFSAKYRVLAKDFTLTKIHLFYKDRSKAAMEIHKKVHLISHLFSW  
LLFQMLSGLSLFLNLTMPYSNLAAGKYRRGGLGNTTFEHSLYYLYPFNTSTDVFGYIVACILHWIISYLCSTWFCMF  
NLFISLMVFNLWGHFKILITLEEFPRPKSIGTSESAYKYSQEELVEVAERLKDCINYHREIKNFTNRMSDVFGPM  
LFVYYSFHQASGCLLLLECSQMTAQALMRYLPLTIILTQQLIQLSVVFELVGSESEKLDKAVYSVPWECMDTKNRK  
MVRFFLMNVQEPHVKAMGLANVGVTMAAILKTSMSYFTFLRSM

>HarmOR7

MKIKMSKPLIFDQSIEKLGVLFRFSGMNIKNKIVTPLDTIKYRWLYTLNFLVVFSAIIGSVYYVILGIKQGKNFIE  
VTSVAPCLTFSILSMIKSLYHLMYEEHIQELIDLLTHEIRENNREKCIEKEEIIANETGFLNKVINVLYVLNCSM  
IVVFDMTPIVMIAVKYKYKTNEFEMLLPYLDVFSFIPYELKYWPFAYIHQIWSECVLLDMAAADYLFCTCTYIRV  
QFKLLQYDFERMIPDRSISKGLFFEENELRNKFTELLKWHQDIIYSSTILEIISYKSTLFNFLSSSLVICLTGFNV  
TIVDDIIVIITFLTFLSMALMQVFFLFCFADLMMTASLEITNSVYNCKWYSANIKVGKQILFVQTRAQEPCKLTAA  
GFADVNLNAFMRVLSSAWSYFALLRTVYGAK

>HarmOR8

MILFAMNFSFLPKQLDIFVEDLLFYFTDCAAISGILTIVFMREKVCELLEMLSDIFQPDDEGLAIVEGAGKFIK  
LYWNI FASVSFTSSAVHLSPIIVHFVIGTELKLPVCSYRFLSENFGQMFVPLYLYQGSGNMFMHMYNVSIDTFFA  
GLMVLTTIAQLDVLDDKKLRRVTDKDEHEDADGETFRQRHDKHREAVRKINQCIHYEEINKFRRLVQDVFSISLQVQ  
FGMGSCIIICICLMRFTMPAPLSYFFFLATYMFMLVIQIMVPCWFGQRIIDKSNFLAFSAYNCEWTSETRQFKSNMR  
FFVERANKPLSITGGKMFRLSLVTFTSIMNSAYSFFTLLQNVKSRK

>HarmOR9

MLDQFDRCLKSVNLYLKFLGLYLESKDTDKTFVERTSRHRLYFAHLFSLNLEVVAQVLWVLEAVITGKSFVEITRL  
IPCLILCLISNFKTSLSLYYGRHNEFIVTMRSLLLNQMQVEEKEHRFRKNLIDKHVLILTSISKKISYIVLDDL  
MFALAHAFIIIPHYFKTDEVKLEMPFIAYYPFNEFDLRVYPWVYFHQVYSAVIAMIMVYGPDCFFFTCCTFIHQF  
SLLNNDMERIVTEETPRYDKTKFKKLAVRHIELMRCVNLEKIFSKSILFNALTSSVICTVGFNVLVVDNI VMMA  
SFTAFLIFGLMQIFLYCYGDTIMRSSMEVSTSIYNSLWYNIPAADRKGFLIIVIRAQKPCALTADGFFKMNLASF  
ASILSKSWSYFALLKTMYPHE

>HarmOR10

MAVKNTSLFLGRPKKILSAHGVPWHPNPNFVILRKLYMLFVMWTQYSFLLFEIYYIADVWGDIDAVSEASYLLFTQA  
SLCYKSTAFMVNKQSLELLEIMDCEIFEPKSAEHEKILAAQARKIKRLCLFFLTSAITTTCTLWAMIPLFDAASKR  
SFPFRIWMPVTPLKSPDYELGYLYQMVSIIYISAFLFISVDSVAVSMIMFGCAQLEIIMDKIQIKIYVFESADSEEG  
RRNI IKTNNEFLVECVKQHQTVVERFIQLCEDTYHANI FFQLTGTVAI ICNIGLRISIVEPNSVQFFSMLNVMVMTL  
SQLFLYCWCGHELTIRSENLEWLYQCPWYEQDTEFKRALFIAMERMKKPIIFKAGHYISLSRPTFVAILRCSYSY  
FAVLNRVNTE

>HarmOR11

MHLAGNAVGTITGPM DYKMKVLRFLVRIISGWPGKALGEKTLRIEGMGHAYNTILSLVYLALGIAYLKKNFHRF  
DFLELGQLYIVLLMNMSTSRFTLCLSQKYREVAKIFIQKIHLFYFKEKSDFAMKIHITVHKISFISAVYLSVLL  
FIAACMFNLIPMYNNYSAGRFASFDNLENTTYEQAISCLYPWNFETNFNGYLAATLSGWYGTILCGSSVSMFDLFL  
CLMIFNLWGHFKILYNLEHFPRPASEVVDAGEEERSGRTVGSEMYSQSELEEVAVLLRDCIQYHMLIYNFTNNMS  
DAFGMALFIYYSFHQITGCLLLLECSQMTAAALTRYLPLTIIMFGELVLLSIFETIGTMSEKLDKAVYKVPWEYM  
DTKNRRTVLIFLIKVQEPHVKAGGLVDVGVTMASILKTSFSYFAFLRTF

>HarmOR12

MEDEPLLDIKTVKNIEFLFRCTGINIKSGTKTRKDMIKSRTVYIINFLWLNIDLAGAVMWFFTGIANSKSFTELTY  
VAPCITLSFLGNLKSFLILREKHVDKLIQVLRDLEINEKARPKSEETDAIKYEHNFVTTVISVLNVLYFVLLVA  
FALSPVSLVALKYFTTNELELLLPFLIIVYFPDPYDIRYWPVYLRQIWSEVVVIIDICTADYLFYTFCTYIRMQFR  
LLKHYIERVIPEDDGGRLTNIEQVRAEFVLLIKWHQDLISSANMLETVYTRSTLNFNVSSSVLICLTGFNVMAIS  
DVAFVATFLSFLFMSLLQIFFLFCFFGDLLMTSSTEISEAVYNCRWYLADTSLGKDLLLVQTRAQTPCKLTASDFSE  
VNLKAFMKILSTAWSYFALLQTLYGAPT

>HarmOR13

MKILSDGSDLEGVEKVEDIFYINLARKSMWILDSWPRTPNESVTYRYFVLALNVATLVGGAVYLRNNTGVLSSFEL  
GHTYITVFMNCITCSRCIMILSREYNEVMSLVNKHILFHHRHKSEYAYKTHIFIHKISHFYTVYLLGLALNGLLL  
FNMI PFYNCYSRGMFRDVI PANATYDHSVFYSVPFDYTKFKGYIAMTSFNCFISYTCTSYFCVVDLTVSLVIFHL  
WGHMRPLTYHLANFKKPASVLESNNTDAIKDHSYTQEELKEVFGKLRREYIRHNNLILKFSSEMSNAFGPALLAYM  
VFHQVSGCILLLECSQLDMKTLVRYGPLTVVILQQLIQISVIFELLGSSNDKLIDAVYLVPEYMDTKNRKLVFVM  
LRQSQRSIDLKMMSMLTVGVQTMTAILKTSFSYFVMLKTVAEEE

>HarmOR14a

MGGIRDFIFNLEAKEGITKPTDYPYMI LCRHLLTVITCWPKEPKEGLDTRAKLKARIWVTFQKIFHLNGCFITTTIG  
MAMYIALHKNSMSFFELGHLYISLLMTVVIFSRVTTLCWNPEYQAVATDFLTKIHLFYKDDSDFSMQTHQVHKI  
SHLFTLLLTGQM VAGMSLFLNLTMPHNNFSTGKYKKGGLKNSTFEHSLYFSYFPNASSDVRGYILSNI FHWIISYLC

STWFCTLDLFLSIVVFHVWGHFKILIHDLNHFPRSLNTISFRLDQSNITLTTEMYSSRELQVQSERLNKSVEYHRR  
IVSFTDKMSEVFGPMLFVYYGFHQTSGLLLECSQMTVEALVRYLPLTIILFQQLIQLSIIIFELVGSVSDKLKDA  
VYGLPWEDMDTKNRKTVAFFLMNQEPVHVKALGLADVGTSMTAILKTSMSYFTFLRSM

>HarmOR14b

MAGLRDFFFNYEANEAITTPKNYPYLIIMRISLSLIKCWPKKTENLAAGAKMKAKVWGMVQNVLHLAFCVLTIVG  
TATYVMIHKKNMTFFELGHLIYITLMLS CVVFSRLATLTFNEEYQVVANEFLNKIHLFYYKDNSEFSMQTHKQIHRV  
SHLFTLYVTGQMLGGLSLFNLT PMYNNYSAGKYSKGGLKNSTFDHSLYYSYPFDVSTGVRGYIFSNIHWWFFSYIV  
STWICTLDLFLSVIVFHIWGHFKILLHDIDNFPKPSKMVSFKLKNTNVTISNENYSTEELEQLADKLKKCIDYHRE  
IISFTNKISEVFGPMLLAYYGFGHQASGCLLLECSQMTPEALARYLPLTLILFQQLIQLSIVFELVGTVS SKLND  
VYGLPWEDMDVKNRKTVAFFLNVQEPVHVKALGPADVGTSMTKILKTSMSFFTFLRSM

>HarmOR15

MTFYELGHLIYISLLMIVCTFSRITTLCNDEYRVIADKFVTKIHLFFYKDRSDYSMETHKKVHMISHIFTLYLSGQ  
MMLGLFLFNVTPIYNNYSAGKYTSGLKNSTYEHALYFSWPFNASTDFRGYVVSNIHWWLSFSCSSWFCVVDFFL  
SLMVFHVWGHFKILLHDLDHFP RPANKISFILEDSYVTITDEIYSRNELNQVDFRLNKCIDYHRDIVSFTDKMSEV  
FGPMLLAYYGFGHQASGCLLLECSQMTVAALVRYLPLTIILFQQLIQLSIIIFELVGSVSDKLKDAVYGLPWEAMDT  
KNRRIVAFFLMNQEPVHVKALGLADVGTSMTAILKTSMSYFAFLRSK

>HarmOR16

MGLRQFLFENEAVEGINSASDYLYIKVLRFMILLIVNSWPRKEIGEPESPKLSAFVKYFYLVVTVLASAGFILYLVK  
HNSELTFLETGHMYIVLLMSFNDVSRVATLTMSTTYREVARDFLTKIHLFYYKDRSKQAMETHRAVHKIAHLFTLW  
LVSQMLSGLSL FNLI PMYSNYAAGRFSGEVSKNSTFEHSMYYPY PFDTSTDIRGYSIACITHWII SYLCATWFCMF  
DLFLSLMVFHLWGHFKILNYTLNDFPRPSSKVEAAKYSDEELVEVAARLKDCILYHREIILFTDRMSNVFGPMLFL  
YYMFHQASGCLLLECSQMTAQALIRYGPLTIILTQQLIQLSVIFELVGSESDKLKHAVYGVPEWECMDVKNRSSV  
IFLANTQEPVHVKAMGVANVGVTSMAILKTSMSYFTFLRSL

>HarmOR17

MFLRSECARSVAPHVRVLRVCGFLRGAALSSRGRAERLALRSYHALALAATS LYVLQQAVYAYQERGMDDKPSQVM  
FLMLCHVTCVVKQIAFHVADRIDRLIASLDEPLLNQCAGERGALLRG TARGAARLLRTYAGCAVATCVLWIVFPV  
INRIQGISFEFPFWTGFSYDHNAVFTLVLLQS FYCTNLVAIGNTSMDAFMATILDQCKTQLRILRINFESLPERAR  
ALHVESGENYDITLDKLFVDCLVHYNKI TEMCTELHDVFAVPLLVQFGVGWIPCM AAYKIVSLDVLSEFASITL  
FITCILIELFIFCYGNEVTVESERVSQSLYSMEWRRARLTFRRSLVLVMERAKRPLRPAAGRVIPLSLDTFVKIL  
KSSYSFYAVLRQTK

>HarmOR18

MEMKVDVLPEKKYKGFNETFKLCAFSLAFALYPNRTTALRRCITITLIVTF CGQLFWFITYTFKCLYTLDIYNF  
ARNMTLAVVLV LFFIKTYVVIYATSKFAPLLDKISDDLLEANNEEEFQVLYDDHIKIAKVG EISWLLIPTIMSAL  
FPIYAGALMTIESIQTDYERRMVHDMELLFVEDIQSETPFFQCMFAYNCVQCVVLVPNYCGFDGSFCIATHTLRL  
KLKMLTLKVNKA FKYSKRQELRMRLYDSIKDHQDALDFYVQLQNVYGPWLFAVFLLT SFMISFNLYQIYLLQRID  
PKYTSFGVVGVLHIYLP CRYASDLTRVSEEIPDDL YLAQWEAWADPSITKLLMFMITRAQKEMIVTGMGLVVFNME  
MFKSILQTSYSFFT LITA

>HarmOR20

MDEELEFKPFHETYRLITFSLCIAMIYPNPRTEKWRLSIPIL IATVAPVAIMIFLDMYKCWKNGDIVNIIRHSTV  
VGPFLGGFFKMILMYHKRVQAKQILDEFDRDHLMFNTVAET YKD IARASIRNCQIYSERLWACLVTTCVMTFPVMA  
IVLNIYNFMFKSEPTKYMIHDLEKPF SKEPEERFESPYFELLFVYMFYAAILYVVNFTGYDGGFFGLCVNHARLKME  
LYCKALEEAMMADREEVYGRVIAVIREQCRMFRYVDLIQDTFNIWLGII FIATMIQICTCLYHITEGYGFDIRYMI  
FVYGAVVHIYLP CRYAAKLKAMSMETS NRFYCSGWERVDDERVRKMIVFMIARAQVPNEITAFNMMAFDMELFLSI  
LQTSYSMFTLLRS

>HarmOR21

MIKRSKFFSWALILNCVLSLLMYTVEAVMRVIRAGATYTTVITAYPDVEDRSALSHVVRVIAYIIWCIYLTRIFAV  
YSLVISLTIAMS YQFKNLTSYFCNL SKIFEDERMTQTEKEQEYERAFRVGIKIHSETLKCTEDIQAICRDVFSGQI  
IFNILMLIIVLMHQMVNSARNLTNAVTLVMAALTILLSTGFFMWNAGDITVEAQLLPTAMFSSGWENCGRDS SVRVR  
KLIVIAMMQAQEPVVL TGLGII ALSYQSYVSVSTFTK

>HarmOR21.2

MTKFLDELNTIFFLVGLTDLWISEVKFSKRFIQIYKKINYMDFLCLFFV FVLLGSYFTQKDLTEKLANDRLMFSI  
ILPGNLV FYYISVYYKEEIRNLLYHHRVLKEQHNDTRLEREMIRNIRVFSITLNSIAFVVDTSYGF GALYE VVTKG  
ENFNTIVPVWPDVDHNSLAGAMRVFFYFCWLNPIATRVLTTFSLLLTEMVAVCYQFRNLQSYFYSLDDIFSDDTL  
SQKEKEIKYEEGFKIGIRMHIMTLWCKKLHQHVNKEILAIEMVLFFAMLMSELTTLLGGERNASQLCMMFLISVST  
CISLGFFMWNGGDITIEASKISEAMYSSGWQHCRGHSSVRMRKLVTF AIKQAQDPVYKTLGVVDLSHTSYVTLVK  
MPYSAVS VLY

>HarmOR22

MMAIHVIMVIFCF SCTL SLWTQKNLSESQQSDRLAYGASAPIITIFYHFVILCYKDDVRKVLYKLVVVLKVDHNDK  
QAEREMMEQSRLHNGLFFSSCVCNMVFGLYNCYLAVTTDATFITCISAWPDIEERSLPAGLTRVVVYFVWFAHVV  
RNMGVFLI IHTVLLCLTQQYKNLQSYFEDLNKIFDETKLSQEEKELKYEIKFKRGIEQHALTLWCVD ETQRVFKIT  
FSSHVLLWCGLLISILPDVMNDDHTLKM LVSNA PRVAAALVGLGYFMWPAGDMSVEASNLPQAMYGSWQCCYHR  
SSRVRLKLV LAMMQAQRQIEMKAFGHLTFSYE

>HarmOR24

MDKLARVMFLL LCHITSIAKQLV FHLKAERIDEMLAGLEDPLYNQPEEAHRRLLGATAASASRFVRAYS GCAVVTC  
TLWITFPVMYRLQGLPVEFPFWITVDYNRPTMFILVLAYSYYVTTLVG IANTTMDAFMATVLNQCKTQLRLLRMNF  
ECLPERAAALSRQLGGSYDAALFALFRECLVHYEKITETAKMLQNIFGTAILIQFGIGGWILCMAAYKIVSLNMLS  
VEFASMALFISCILTELFYCYGNEVTDESERVSQSLYSMEWRRARLTFRRSLVLVMERAKRPLRPAAGRVIPLS  
LDTFVKI IKSSYTFYAVLRQTK

>HarmOR25

MPSDQSRMFDPLTLVLKIFGVWEGRTPSKYYKTFSFLFLFVSWFFYNFLLTSLVYTTPRSVELFLRELMFYFTEIS  
ITSKFLTIVLLRNKILEVFSVIDSDEFVGDYENKDGILYRTNKGYSLCKWVYNVLANIDYTCVIMPVVIDLIQGT  
KSVLPICNYYFLSEDFRDSHFVILYLYQSIGMYGHMMYNLNMDSLAWGLLAVGIAQIKVLNKNFTDLKLSAEESKL  
PLEIQDNINQKTRLFKLLRHYEAILNYCDAIQNLLSVTFFQFSFGALTTCVIMCSLLMPGTMVYRIFLVIYLFAMA  
GQIAVPGFFGTLLTHESQELVTAAYNCEWIERSQSFKRTLILFRERAGTPIIISGMKMFPLSLVTFVAIMKTTYSF  
FTLIRNA

>HarmOR26

MDCTIVAFYAQAKIQIQLRHNLEQLVEFDDSAKINTQFNKTGLYSTSYKDEQQERVAIQERLKKCVQHYHYQILRF  
AKEVESIFGEAMVVQFFVMAWVICMTMYKIVGLSIYSAEFVSMAYLGCMLAQLFIYCYFGTQLKVESELVNQSIY  
CCDWMKLSPRFRRLVMMQCCGRPIAPRTAYVIPMSLDTYIAVLRSSYTLFTFLNR

>HarmOR27

MGKDDPDLRFECFSVLSFCAMGMLKLLSLRKNHRKWRKLLTQITILENTQLSNRSISCVEYQSDSESDSNFSEHIS  
IYTKKFRGTSIVLTRIYSFTAFLFILSPFAERIICEIRGVECVGYPHVFPGWTPLDDFSIFGYLVTVLCEVFSAVY  
CVCVHMAFDLTVIGIMIFVCGQFSLLRDYSSRIGGKGRQCNLMSRRDERARFRIIRCHDINLLLVNSITELDMLLK  
NIIGVYFFVATLTLCSVAVRLKSEDMGMVQLVSLIQYMCGLTLTQLFLFCRYGDAVLHESTMGMGEGPFAAASWCLS  
PRVRDLMSLSAGMMSQRHLRAGPFSFIDLPSFIQVVRAAYSYYAVLGKKE

>HarmOR29

MGYQQIDCFDIHLKILRILGVWPHDNPSIYYIYFSRIFVFVTVLYVVIYTMNFIYFLPQQLEVFADELIFYFTNVG  
ALSKALAFIFLRDKVKKMLFMLESEIFQSDDEEIKLIKEGKEKSNFYWKITAGLSVSANTVNVCLPLLVIHIFSV  
ELEFPVCRYFSFIPEKYEAMFAYPAYFYQSIGITTHMLYNVNIDTFLLGVMFLAMTQLDILDRKLRKVTDVCINPDA  
ARGSVDKFIDQNAVLEIIKCIKHYDAICEYCKLIQDAFSEILFVLFSSGSKICMCLFRFTMPATTGYFVFLYTY  
VTVMTLQVMVPCWFGSRLMDKSSQITIAAYDCDWTPRCRRFKSNLRLVERANRPITIIIGKMFLLSLGTFTAIMN  
SSYSFFTLMRHMQSR

>HarmOR30

MVSSQITCGLWAMKPLFDDADRKFPPDMWMPVSPEKAVQYYIGYAFQLGTICISAYMYFGVDSVVFSSVIFGCAQI  
DIIKEKLMSITTVDRKQGTKEALAQYNKLVDCIKHHQAIVTFTELVENAYHPYLLFQLVGSVGIICMSALRILVV  
DWRSMQFFSILTYVSVMSQLFVCCWCGHELTSSEDLHTVLSNASGTSRT

>HarmOR31

MNSILQNLLEDPNRPFLGPNYWIIKNMGLLLPKNFLAKILYIILHEIVAFFVITQYMELYVIRTDLDLVLTNMKISM  
LSVVCIVKVHSFIWQKHWHDVLDYVTAADKFERQSDDEPKSRIVETYTRYCRRLTYFYWLVFTTFLTTGTPLM  
RYLSSSTFRQNMRNGTEPPPHIFSSWMPIDKYHSPGCWITVLWHTLLCAYGAAIMAAYDTCIVVIMVFFGGKLDLL  
RERCKQMFGPSTISDRQCEEVVRQLHGIHVMMLKYSRFLNSLLSPVMFFYVMVMSLMLCASAYQLTSAQNAAQKLL  
MAEYLIFGIAQLFVFCWHSNDVLIKNENMTSGPFESNWFANRQRKDVLTLSGQLCIKNIFTAGPFANLTLPTFI  
NILKGAYSYYTLRK

>HarmOR32

MNKDFQTSKDLPPKERDSIKKYINQGLWVCKQWLFLTISGCAIFLFKNLGLMLYYYCMNEFRLVPFYEVVLYPPIM  
EENRDNI FVYLLMYAIMLLFSAYSALMYAAFVPLGPFI FILHACQQLVLVKLRIDDLFVECDDEVIRKKLKGIIHL  
QYVHSFVDRIQQVFKIGYELTLKFTALILPITIYAVLEGFYRGEVNVEFVTFIVGGVMISGSPCYSDLLMEKGED  
VRMSLYTCGWEQHYDRRTRTTLQLMLQNALKPIAIQTVFTVMCLDALTDLFQQSYAIFNLMNCMW

>HarmOR33

MWRYIRKFGLEYCDLPTMLWNVSULLKVLTVNIYGKNRKAIPLIFYIIIVTVGLLTYFYVYVSMIWFVFSRCPVTG  
DVLAAIIVFSLGVASEISTVKFLYMRIHIKDVVKMADCLDSYSKVVPGTRFSNNLLRTLREAKRRAMLFWMVIIG  
NGLMYVVKPLLLPGRHFMDVLLYGLEPMFETPNYQISFVLMGSSCVLICYLKANISAFIIITGYVQAQMLALS  
EELTHLWEDAENYRGNLELIDTDDGDQNDNRKDAIILNDYVTVHLKDIKSHAENINLLGQIEGTFRGAIAIEFCL  
LVVALIAELLGGLQNTYMEVPFALMQVGMDCCLIGQRVMDAGAVFEDAVYDCKWERFNKKNMKTAMVLLLNAQRPM  
TISA

>HarmOR34

MSAKFSIMQIFKFLEDPAYPSVGPLKLLGFTGLWHPNRHTLVGRFKHILFYITISFFFSQYIKCFINFNASSLKL  
ILQYAPFHMGIKSCFFQKDYKTWQQVIDYMSSVELAQLSKSNKEQYKIIYDIKRNKRVSYFFWALAFFSNFSIF  
TEPYQKNQINVNGTSIYLNIFDGYTPFQKEPPGYIISMLIQTVLGHIVSAYVVGWDTLVVSIIMIFFAGQLKITCLR  
CKMMIDVTNPMKSHLKIAECHRFTTLVEYTRIFNALISP

>HarmOR35

MCLYLPFDLVIVIMTSNVSALLRLLQVDLKNAIQLRDEQHKTKSHLNVSDTQSYEELKRIVDIHQRLRLRIADQLSS  
IFGLVIFIHVACAALCFFGFLTMVYGGLAETIANMLTVLNAVFTIFLLSLSGQFLCDTSSEVADAAYESYWYES  
DHKVKKLTLSIIIRAQRPSYLSALGFSQTLKSF SKIMSSAWTYFSLLIQMYEET

>HarmOR38

MIILSENIKQKLAFLSPYLPYGVIESWEDLNPRLYHAVHIYWLKFGYGMWFNNYSPNNIKFWLHMVYTLTVLWLACF  
FPGIGEVVYLLKQRENIGDIADGLYFLSEMYTYVKIAVFWMNRDKVISLLEYLHCKEFPKPEPEHRDIITKSIKS  
ARFVMTYYSTMCVGAVSVGIIMPLTENFDILPTNVEYPPFNVYRSPAYEAVYIHHIYYKPATCIIIDGVMDTILAAF  
VASAIGQIEILAFNLRNPNLVAERQRRDLAQNKYIEEYPAQHYVRSVLKECIRHNCIIRYVSMIESAFSLASAL  
QFMLSVMVLCIGIQFLSIENPSAHPMQIAWMGIYLTCLMIEVFILCWFGDELIWKSMDLAKAAFEQPMNSDRQT  
NMFIIILLERCKRPLRLSAGKIFTLSLDTYTVLINWSYKA  
FAVMRNMKK

>HarmOR39

MHRKRKEFNDLLEVAQKNDLIIETGRFLHVHEKMLRSIKIIILFCYVFHFINEVVYIPFRILRMEDFSIASCVG  
FGPLNVSPNREVCMLTAHILISIMVICYDISLLFLFSHTTAVFQILFEEMMSINDITQTCQNSDEDYAVIVAR  
LKNVIVRHVALQTVGKVEDIFSISIGICFGLDAISLCLILCVATRSLYAFCSDFITAFSIFFLYCCQGQRLTTAS



EKFEMAVYCCGWENLRVKERKQVLLMLKRAQKPVIVYAAKVIPIRIYTFASTMQAIYKFVTIFKV  
>HarmOR40  
MAMRNLSTLMTSTVCVFKACNMLWQNSWKELIDYVSELEERSQLSKNDPVVNKIIISDYVKYARRVTTYLYWALVTAT  
VVTVILAPLFIYLSPPNYQESIKNGSAPYPEIMSSWTPFDRSRGLGFCGATLYQMLACFYGGTVVANFDSTAVVIM  
TFFTQGLKVLSSVNCERLFGDGNELVDYDEAVKRITECHLHHYVMKFSSVLNLLSPVFLYVYIICSLMICASAVQ  
LTTEGTGNMQRIWIAEYL  
>HarmOR42  
MTNSRPRHYFGFHYRILRFLGLGWWHHP EEGKTTNFPGWYLYYSIVTQVVWVAGFVGLETIDPFVGEKEMDRFMFS  
LSFVITHNLTLIKLYIFFFKNVDIQEIVRTLEIELDYDYQNIIEKNRKTVKISKIITGSFIFFGWLTIGNGNVYGTI  
QDLHWKSLVATLNDTSQIPVRTLPQPIYIPWNYQKDKSYIPTFVLETVGLLWTGHIVMTIDTFIASVILHMG AQFE  
ILNEAITTAYDRMTSLREGIRPEDSGHQGQSSILSVEDSNERIVHAFIPKEEIDAALQTTFRNCFRQHQVLINC  
VEKFSRTYSYGFMTQLLSSMAAICVVMVQVSQDASSFKSVRLITSVAFFFAMITQLGMQCFTGNELTLQAERISDA  
VMQCKWERIPTRQRRLLLMMMMRAQRPLRLTAAGFTNMDNACFLAIMKAAYSYYAVLSQRQE  
>HarmOR43  
MVKNENRSLQYCLTVLKVAGFLHPLGDGRIPRLTRRLYCFGVFMFLVGCIIMAGTGAMFEIWGDLALMTSASFLLF  
TNLAFATKIINVVVRCREIQEIIDEQDADLLAEDRYLGIEVIKSCNVETSLSMGLYTLLSGVTVF GWAASAEKNQL  
PLRAWPYDTSKSPAYELTYIDQSSAVTLAALVNVCDLTIVTSLIAVCRCLRLVALSLRTLCDGIPLPKQLISP  
TEERIVLTRLSQCIKH EAALKAARQIQRCFSLPILAQFAVS VVIICVTAYQLAMELNNRNWFRICIPMAYLLCMA  
LEVFLYCYQGNELLEESSEIAGAAYECPWYHCSVRMRRTLLIVMVRTRRALRLTAGGITTLTSLACFTSIIKGSYTF  
FTVLQQAEDRNPK  
>HarmOR44  
MGYMIYSSSARMLSALVVICEIWHALGNMMSLDELISSVNVI F IHLITLWKL MIMVSNKKVFKKLARALESPSFDI  
STENRQAI VNHVWLTHKKYLKVLCLAYLTLAVVWLHPLVDDMDFNLMVDVKLPFAYDSP LRYVISYLFVGTMTFSY  
ASSMVIMSEVIMQAHILPVLCQFNVLANCFENVFEECASEFPDINKHELVKHNMFVEKYRKR LGDLVKQHREILDQ  
TTDLKTLISAPMLGQLACSGLLICFVG YQATATIAENLGKFVMSLFYLGYNMFTLYIICRWCEBITIQSQRIGQSA  
YFSGWESGVSHVPGARATIILVIARSNKPLVFLAGGMYTSLTSYTSLVKASYSALNILLTTKHE  
>HarmOR45  
MRLQIILED FLLKKT FDFDRPDINLYNFHPQLRILLAVKGVFFTNRRSLLRFIWP CICIQLSIVAMTLEE I FIWRGV  
TVKDYSFATECFCYWVILGCIPMVYVSIVVNTNKIYD I VVTMNEDFIYVCSLGDRYRKPFLEGQLLIWQLCYAWFI  
FVCFVGGLYV I I PLVGLLYQSLFATIDENTVRPLQFPMWLPND DPYRTPNYE I FLVIESTLIFCFVQTF CVYIYTL  
LHILLHYTTIMNMIIIDFSVIFEGLDES VALLPRHDP RRRETQLILNARIAKIVRWHL SVFKAVSTVSSVYGPPLV  
YQVSFSSLAICLIAYQIAEKL DNGKVDILFCLLGIAACLQLWIPCHLGT MIRNKAFEVG DAGWTCGW HETPLGLMI  
RNDILIIILRAQKPVTIKFTGLPSVQLETFSSSTMSSAYS YFNMLRQYSK  
>HarmOR46  
MSSLGTIADSLPLLVS LII VAYYAMYRQDLYDLMEYMERNFKYHSAGGLTNMTMEESCKTAQR FARIYTACTMFSV  
TMYATMPV I IHLWTKEPIQSWMYMDITRSPFYEFVFLV SCLAQMFVGLAMQFGVFFASNSILICGQLDLLCCSLR  
NARYTALLQHGVKHAALRVSHATI QDDEKHNYIYNVSEMKE SVYHYDKKVS NLYAEAKTQFDIYSSEFDDATVNAL  
RDCASLCQVINRYKEMFENFVSPLLALRVVQVTLYLCTLLYATLKFDMITVE  
>HarmOR50  
METTTYTRSKTTEFFYKMF AIIYIFGLPNFWIEDLKLSKR FVKIYDKISL FNDLLVYLLLVMEFGAFFTQHNLTDK  
QKFNLMVFAISHPLLCSFCVMVSKLKKKVRLVMYSQAVALKRDYNDPEVEKQMIARSLTYVLA FMSSCTITMIMFA  
IEAIWDVIRHGATFTTLITAYPDVQDRSILADVVRVLAFVTWWIFLTKMVAVYMLVIPLTISLRYQFKNLQSYFLS  
LAELFERSDLSQKEKEEY EAGLKLGIKLHSETLSCAEDTQDVCRGVFSGQIIFNILLIIVLMAQMVTSERTFVNM  
FGTVATSTCVITSTGFFMWNAGDVTVEASYLPTAIYFSGWQHCQRDSSMRVRRLVVT CMSHAQQPVIK FGLGYIEL  
SYQSFTITVKSSYSVFSVLY  
>HarmOR52  
MRTLREIGQEIRKFGLEYCDLPTMFENVAILLRLLTLNIDIKYKGGITFYSYIITIVSGACYYVFFFSMTWYVFW  
RSRELGBDIGAMIILSLGITSEIGPLKLFYMSYNKDKTQKIANDFLECDANTIKSTRFYANLLKH CRTVKKRAMLY  
WIVVAGNGVIYLLKPITMKNRNLPENYFLIFGLEPIFETPNYQIAYCMMVSALFFVCYVPACVTAFLIVVTGYAES  
QMLALSEEMIQLWPD AIKRAEERTQLDPSKVL DVYNLEVKTIMNQFVEKRLKEI I KRHALVINLLNQVEIVFRQAI  
AMGFVLLI VGLLAELLGKLENTFLQMPFAFMQVSI DCFAGQVRVMDASLVFEKAVYDCRWENFDKANMKLVLM LQS  
SQKTLALSAGGISTLSFTALMSIYRGLYSSYTALRSTVK  
>HarmOR53  
MSEKEFDKTLKLTNYALIMSGIKTSENDMNKALEYFINHYLFYCNAIALHTVIFGEVYWIVDGI RTNHPFVELSLV  
SPCATISILSTIKCGFIFSNKGILMRVVHKLKEIHTSFDDNELSKESSARTKI VTD SLKLLQFVQISFATIIYFVF  
FSFCFIPVILAENYNYRTGEFVVTYPPFVKYPFD FDVHHC PVWQLIYFHQVWATAIVIMSMFGCDSLFYGLCVYIK  
THFQLGLRFENIVGATKSETQRNLAKAVVRHQELIDLNVQMEMLYSKSSLVNIITSSILICLSAFNITVVDKLN  
ILAFVTVFLVMSLSQISLV CYFADLLMAASMEISGSVYRSPWY EADNHSKILLLVIMRSQKACKLTAWKFADLNLG  
AFTTILSRWSYFALLKT VYK  
>HarmOR54  
MLTASSRLKTVFEMSHHGLSLIPEGTASKKIMLATLQQARYFSWL VVANLAVTHVTYLLMPFLFTVLGNDRYLPTT  
PGETYGLSPKYETPFFEITFVLT SVATAFSAINQ TGYIVLFVT LICHELGHFYAITEALHEIHTILTKEERSRNS  
EQNEQKSVDKLLIFCVKHHQFLMNFHGKIRDMYKVI FGAHFLSMTVVLVTTLQTMNVWDYRNTILTGMSGIMPLFL  
YCFGGEK LISAGLQMSAAYS CGWEMMEAKQAKVLLMLCLVQRPLYLTAADIFIMNRETFGDVAQVYKIYAVFN  
>HarmOR60  
MGVLVRNATMSVSI SLTALQFVGFWAPEYLGKTQKQLYTCLSVFSFMFL LGTYLIIQVVDLFLIWGD IAMMTSTAF  
LLFTNMQAAKIVNIVYRKERIQRIVNDCDAVLSRAQSLEEKEIVKSCNREMIVLQILYFSLTLITS LGWATSAEP  
HQLPLRAWPYDTTKSPAYELTYVHQVGALLIAAYLNVAKDTLVAALIAQCRCRLRLLYALRTL DKGMGNEAYTF

TSEQEKTNLNRLGSCVMQHQKALDVGKELQECFSEPTFAQLTVSLIIICATAFQLSMGHSDNMVRLLSMGTYLLNM  
TFQVFIYCYQGNQLSEESSEIAGAAYECPWYKCSVRVRRLGLLIVMVRTRRALRLTAGGFTTSLACFTSIIKGSYT  
FFTVLQQAEDRNP

>HarmORco

MMTKVKAQGLVSDLMPNIIKLMQAGHFLFNYHSEENAGMSNLLRKIYASTHAILIFIHYACMGINMAKYSDEVNELT  
ANTITVLFFAHTIIKLAFFALNSKSFYRTLAVWNQSNHPLFTESDARYHQIALTKMRLLYFICGMTVLSVISWV  
TLTFFGESVRMVTNKETNETLTEVVPRLPLKAWYFPFNAMSGTMYIVAFQVYWLLFSMAIANLMDVMFCSWLIFA  
CEQLQHLKAIMKPLMELASASLDTYRPNTAELFRASSTEKSEKIPDPTVMDIRGIYSTQQDFGMTLRGAGGRLQNF  
QQNPNPNGLTPKQEMLARSIAIKYWVERHKHVRLVASIGDYGALLFHMLVSTITLTLAYQATKINGINVYAFS  
TIGYLSYTLGQVHFHCIFGNRLIEESSSVMEAAAYSCQWYDGSSEAKTFVQIVCQQCQKAMSISGAKFFTVSLLDLFA  
SVLGAVVTYFMVLIQLK

>SfruORco

MMTKVKAQGLVSDLMPNIIKLMQAAGHFLFNYHSENGGMTGLLRKIYASTHAILITIHFACMGINMAQYSDEVNELT  
ANTITVLFFTHTIIKLGFFALNSKSFYRTLAVWNQSNHPLFTESDARYHQIALTKMRLLYFICGMTVLSVSWV  
TLTFFGESVRLITSKETNETLTEIAPRLPLKAWYFPFNAMSGTMYIIAFQVYWLLFSMAIANLMDVMFCSWLIFA  
CEQLQHLKAIMKPLMELASASLDTYRPNTAELFRASSTEKSEKIPDPTVMDIRGIYSTQQDFGMTLRGAGGRLQTF  
QQNNNPNGLTPKQEMLARSIAIKYWVERHKHVRLVASIGDYGALLFHMLVSTITLTLAYQATKINGINVYAFS  
TIGYLSYTLGQVHFHCIFGNRLIEESSSVMEAAAYSCQWYDGSSEAKTFVQIVCQQCQKAMSISGAKFFTVSLLDLFA  
SVLGAVVTYFMVLVQLK

>SfruOR53

MFLKKVLYKTKRLEDKPNLLGPTLKGLYLFGLWQGTGKFRTVVYNIHLTFTFFVTSQFVDLYFVRHDINKVLNN  
MSLTVLSVICLAKCFSYVFWQSEWRKLAQSISEEELKEIKNGDPIILKHMEGYTKYTRIIITYMFWTMVLTINFLLI  
LTPLLKYVSSHYSYREEIRMGTEPLPQILCSWFPFDNERMPGYLISVIVHIMGSGQSGVLAVYDMNAVAIMSYLKG  
QMIIILREKCNLSLFDVDTSTQDVLDRIKECHRHHNVLLKHSSVFNSLLSPTMFVYVLMCSITICGSVVQFSSEKATA  
SQKLWVFQYTSGLISQLFLYCWHSNEVTLHSLVDGRGIYSSDWWKSNVRVRKQLLLLAGKLNHPLILDAGPYTTLS  
IPTFIEIMKGSYSFFTLLFSQMQUEN

>SfruOR30

MVSSDLFLNRAKFVMKYLGWVVLNENASCFKLKAYRGFMMTLQYLFLIFQMIYIVQVWGDLDVAVSQASYLLFTQAC  
LCLKVTVFQINMPILKELLRLMDAEVFKPENDVHEKLELQAARIKRLLLAFMVSSQITCGMWALKPLFDDADRKF  
PFDMMVPSPEDAMQYIYGAQFQLTICISAYMYFGVDSVTFSSVIFGCAQIDIIKEKLSITSIKERRGTKEVDE  
ALADNYKNLVDICIKHQAIVTFTTELVENAYHSYLLFQLIGSVGIICMSALRILVVDWRSMQFFSILTYLSVMISQL  
FVCCWCGHELTIRSENLRWLYQCPWYEQDTKFRSLFIAMERMKKPIIFKAGHYISLSRPTFIAILRCSYSYFAV  
LNRVNT

>SfruOR60

MGIFVKNATLSVSIISLTALQTVGFWAPEGLTETQRCCLYRWFGVFSFMFMLGSYIFIQVVDLFMIWGDPLMTGA  
LLFTNLAAQATKIVNIMVRKQRIQNIIVNDSKVLTEVQTFEEKEIVKSCNREMIVLQVVFYSLTLITGLGWATSAEK  
HQLPLRAWYPYDTSKSPAYELTYVHQIGALLIAAFLNVGKDTLVAALTAQCRCRLRLGLSLRNLDKGLDTEKFM  
LTPDQEKTVSSRLRLCVVQHQETLQAAKELQECFSEPTFAQLTVSLIIICVTAQFQLSMTQPDNMVRLLSMGTYLLN  
MTFQVFIYCYQGNQLTEESFEIAGAAYECLWYKFSRLRLRALLIVMVRTRRALRLTAGGFTTSLTSFMAIIKASY  
SLFTLLQVNEE

>SfruOR32

MTNHKELNFESTFKITTMALHISGAHPGVPKDLKWVLKFIILHGIFTFTFSIVIYSIINHDLKEKNFIQICKNGVM  
FVVFVVISFQYFVLVIHQNLVELIKVNVADYEELQNLSEKEKRLMYKYVDQGIKVCQWFIITFAGCMFIVKSI  
GLMLYYHLINDFYVPLVDIKYPALIEDRKNDNLFVFLGTYLLLSFACYSSLYTSYVPLGPIFMLHASGQLELV  
RNRIEDLFLCDAAEIRVKLKGIIIMKLQYIYSAVDDMKVKFKGYEITLKGTAIVLPITFYAVLETAKNGEISLEF  
ISFIVGGIMISGAPCYSDLLMEKGEALRMSLYTCGWEQHYDRRTTTLQMLQHALRPIAIQTIFRTLCLDALTD  
LYQQSYAIFNLMNATWN

>SfruOR35

MTSLYRRYFFKKKSKQRSNERIYDKSDYDTSYAPTCKVLGWVAIRMTHNISEKTMLWDMFYWFEMANLFLVGPSE  
LVSMLTAYEAKTFRDSIKVFRTPMPCFGCVVLSMFKSIKMVVHRPVYENLANELREMWPEGEVSEEEHHIISSALK  
QLNFIKGYIYWCNNALLISFLSPPYFITIARYFYGYDSMGLHFLYWLFPDPYQPVYIEITLVLTQTHALVVIWVFN  
AWDMLFCLFLCHITTTQFDLLARRVRLFYVQVDKQLVSSYPMASVSKEFLETEGDRVNSYGAQYWEARYQKEITEI  
VLRHHSILRLTNDVENMFSLALLINFMNSSIIICFCGFCVVLIEKNEVAYKSFLVTALSQTWLLCWYGQKLIDSS  
QRLSDALYGCWYNSSKRARS AVLIMLHRAQKGIYVTTGHGFSVISLASYSTIIKTAWSYFTLLNFFKEKSVN

>SfruOR16

MDLKKFLFENESVVGINTPSQYIYIKIVRFMLVIVGWSWPREMGEPEPRHQTIMINSFFFCVVNAALYGSISYVCM  
HTSELSFLEVGHMYIVILMSAIDMSRVFTLTYSQRYRDLAKEFLTKIHLFFFKDRSPYAMLTTHKKVHLICHFLSLC  
LLSQMLTGLSLFNLIIMYTNYASGRYSTGGTQNSTFEHSLYFPYPFNTSSDMNGYVVACILHWLLSYFCSTWFCMF  
DLFLSIMVFLHWGHFKILINSLNNFPKPSAETRCELEKGFIIINADKYSKEELVEVSQKLKECIDYHREIVQFTNAM  
SDVFGPMLFCYIIFHQTSGCLLLLECSQMTAQALIRYVPLTIILTQQLIQLSVIFELVGSESEKLDKDAVYGPWEC  
MDANNRKVVAAFLMNVQEPVHIKALGVANVGVTSMAAILKTSMSYFTFLRSM

>SfruOR45

MRLQIIKDFFLLKQYFDFDRPDINLYNFHPQLRIFLAVKGVFFTNRGSRLRLIWPSCICIQLSIIAMTFEEMFIYRGV  
TIKDYSFATECFYWWLLGCIPVYVVSILVHTNKIYDIVVKMNEEFIYVCSLGPVYRKPFLEGQLLIWQLCYAWFG  
FVSFVGGLYVVFPLAGLIYQSLFATLDENTTRPLQFPMWLPHDDPYRTPNYELFLLIQSTLCFCFVQTFVYVYTL  
FHILLHYYIIMDMIIIDFSVIFADLEESVALLPRYDTRRMETQORILNARIEKIVKWHLSVFRVAKTVSSIYGPPLV  
YQVSFSSIAICLIAYQIAEKLDQGSLLDILFSLLSICACQLWLIPCHLGTMI RNKAFEVGDAGWKCGWHETPLGLMI  
RTDIIIIILRAQQPVTIKYTGLPEIQLETFSSCMSSSYSFNMLRQYSK

>SfruOR50

METTTTTSYTHSKTTNFFYKINFIVYIFGLPNFWIEDLKLSKRFBKFDKFSMFNNTLIIFLLIIFELCSYFTQSDDO  
LTEQQQSNRLIYAISHPMLFMFRVMMTSIKERVRLVMYSLNVLKRVHNDLEVEKQMIACFTMYLSALLLSCLMSM  
LMYAAQGFGEVFRGKTFTTIIITAYPSVEDDSDMANVVRAICFIWWIFLTRIYAVYMLVISLTTCLSYQYKNLQS  
YFVSLNDIFERSDLSQTEKEEQYEAGFIVGIKLHADTLRCTLQTSVCRGVFSGQIIIFNILLVVLMAQMANSERT  
LVNLCAGFTACAVLISTGFYMWNAAGDVTVEASHLGTAVYFSGWYHCQGPSSVRIRKLVVFTMSQAQRPVVLKGLG  
YIDLSYQSYIRIVKSSYSVFSVLF

>SfruOR39

MANFRDRFHNLRDLKQNSCVNLVWLNFLPKLAGFPLLSQKFKFLFWIVHISFLFYVYLLGTAVYQLYFAEDFVD  
SINSFFNISVFIIGNDSWWLISKRNLDNLLKMVRKNDDLIIESGRFLDVHQKLLRSIKIIVIMCYVFHFVNDVM  
IFIPSRITIGMDDFSTVSCVGMPLSSSPNRQACMAVLALQELTAIVAVCSYDVALLFLFSHTTAVFRILYQDMTDF  
ANISKSHETYHVIEDRLKNIVFRHVLALHTVRKLEDIYSVAIGIGFGLDAISMCLFFVLPLDVCLNFAPLIYHSLF  
IFFLYCFQGRQLTTASEKFEMAVYCCGWENLRVKERRQVLLMLKQAQKPVLYAARVPIPIRIHTFASTMQSIYKFV  
TIFKV

>SfruOR13

MDDIKLSTVKIFSDGSDLEGIEKVENILYLRILKKIMWVIDGWPKEPNKRQIFRYIICILDMSLSLVPGSLYLVIIYT  
GKIPSVELGHSYITVFMNAIAALRTVLVLTKEYNAIVLYFLKEVHLFNFRKSDYAYETHILVHKISHFTMYVFM  
LMCCGILLFNLTPIYNSYAAGMFRDERPANASFDYAVFFALPFDATNFKGYYVVVSLYNWYISITCSTYFCIIDLT  
IFIMVFLHGMVRVLSYNLENFPPASVLAADDGSAYTLCENKYNEEEEQVEVFIRLRDCIQIHSLVINFSMMAD  
SFGWTLVLVYLFHQVSGCLLLECSQLDTAALMRYGPLTIIIFQQLIQLSIIIFELLGSSNDRLVDSVYSPWEYMN  
TANRKNVFMRLRQTHRSMNLKACSMVTGVQTMITILKTSFSYFVMLRTVADEEE

>SfruOR3

MALTVLERFYLIIDGFFSFNIKYLFFVGLWPEKTLTRNQKILYKIYEIFIHTLTIIIFLIMAGIGTYQHNDLLIVL  
SNMDKSLVVYNFFLKTIIIFLIKRDQLKDLIDEIEASGDEVTKERKKLMANYVMVITGITAAVVSASFILALLEGAM  
SIEAWMPFDPMESSMNLVLSLQIIAVCVFPALCRAFAMQGLVCSMIRYLCQDLIHLQKELRSLDYVKDTEMITRMK  
FKMIIRKHIRLMSYSMKMESIFKEYFLVQNLAVTVLCLNAVMMTTVGQQITLLFSFLVYLVLALINAYIYCYLG  
NELIIQSEGIALAAYESTWTSWPVDLQKDLLIVINASQRPLKLSAGGMALLSIQTFSQALYNGYSIFAVLNDAVN

**GRs :**

>DpleGR64e

MDYATTYNRPVKKIIKSGVSPLVFYSSTTMITILFLHIAMKWPNLCRYISCTEAIDPLNDYALVRKCNVACLLVLS  
FAFVEHGLLELSGFVFATDCSPPGKVYETIIVNSFPWFNNIVNYNLNLGIIITQLLNIQCTFNWNFSNLFVINISLY  
LTSRLEQINNRIISAIK GKAMPSTFWRNVDYDNRITSLVRKVDKVIGGVIFISFANNLFFICFQLLHTLAFTYLSG  
RCAYTLTLTIVLQTLNLLNIFLLKYFKDTNTSIVGNTPLVFYSSTTMITILFLHIAMKWPNLCRYISCTEAIDPLND  
YALVRKCNVACLLVLSFAFVEHGLLELSGFVFATDCSPPGKVYETIIVNSFPWFNNIVNYNLNLGIIITQLLNIQCT  
FNWNFSNLFVINISLYLTSRLEQINNRIISAIK GKAMPSTFWRNVDYDNRITSLVRKVDKVIGGVIFISFANNLFF  
ICFQLLHTLAGEVKATPSCHTPDQRIIFRGYEQATYFLYSLIFLIVRSLALSIIAARVHTVSRQPVYTYELPSADY  
GIEVQRFIDQIHGDTVALTGLQFFKVTRGIALAIIAGTIVTYELVLVMQFTGVNPTVDIYTDSTKV

>DpleGR43a

MNDDRLASTYVAVIAGFAIDLQTDPSRSLRTSTPTSCLVVWSNFTIVIMVASAGVYQGSETFATNIKTLKQMIEIK  
TFIGLKAETDSDRNNRFTVAFISSGLCFLLISDLFSWVKEAIYSDDKDLTLIMYSFLYIEYILIELIQLQFVLLAW  
ELRFILKNINEDLKKKTSNALPTKGKSFTRYLHRSNPIGITALNNYVTALNRPKCQSLLLPESKPSYGASFTDES  
RDDELEVISGGGIRDSSVAYGLACDVLRLQINDNYGIVLLFIVLSFFLQLIITPYMYLTTLTYTSVDWRLNLFQCCW  
CIFHICNMILVVEPCHRTQQEMDQTQILVCLILRSETINKFMLAELDLFYKQLTLNRPSYTPMGMCMTMRPLMVTI  
IGAVTTYLVIVFQFRTEFLHLKH

>DpleGR24

MSVYKNNLYPQIKNIPNGFAKQISDRPNKIVFLDVPSRTEQLNHITTSNIVPLRDNLISPQINSDIIYENIKPV  
FTLLRMGVLPPLTRTSPGHNQFKMLSPSMVYSIFCFLGLVSYVMYLSLHKVQILRTTEGKFEEAVIEYLFVYLF  
MMVVPPIIYETRKIANILNGWVDFEVCYKYLSSRVLPPIKMYKKALTMVAVIPILSTSSVIIITHVTMVDKVMQILP  
YVFLEILTYLLGGYWYLLCETLSFCAGILAEFDHQALRHVGPAGKVAEYRALWLRSLKLAQDTGLANCYTFTFVN  
YLFLLIITLSIYGLLSQISEGFGIKDIGLFTVACCSIFLLFFICDEAHYASLNVRTNFKKLLMVELSWMNTDAQTE  
VNMFLRATERNPSQISLGGFFDVNRNLFKSLLATMVTYLVVLLQFQISIPDNTQDTYEDEKLIITNDTTATDATKIT  
TTLATITLTLAKKKKKKN

>DpleGR64a

MSISSGQGRGPFTCTSLISLRRARNHRIKQMTKCTFETQIEVFEGSMRYFLLVGKCLGLFPLIDITSYGRNDIST  
RHGVPLCPNPNATGPYYKYEQMVTNAYFIYSSLFVVVTRTFVSIIAAEVHSVSLEVAPVLVNPSPTYCLEVHRFV  
EQIHGNKVALTGLKFFYVTKELVLSMVGTVITYELVLLQFT

>DpleGR5a

MTGQILMTIMCIYNTVYSKASLNIETPVIYGMTCTITAMFLRVATLWPKLVRHITAVEESDPNYDTSNRKCNVT  
CVIILLSSFEYVLSLLFAFVKASELKNKDSWCESFAEYLPWFVNYLPFSPLLGMVQLIHFQATFIVIFSDLFI  
ICMSYYLTSRLRHINTKVLVARQKHLPEIFWGRTREDYTRAVKLVRKVDDVISGIIIFISFAHNLFVVCVQLFHTLE  
RSSALGGYKTETYFVFSLIYLIIRSAVAVSLITSQINTASMPALVLYDVPTSLYCIEVQRFLDQVTGDKIALTGLQ  
FFRVTRKLLLNIAGTIVTYELVMFQFDTTTSNELGTPFPSTNLMMNRSFQRSNLTG

>DpleGR22

MIPDHLFDEGINNSLLRNDMKHVHLNRIVYNTQKDYERDQRNLLSSQDGDTCIEIHDQFYRDHKLVLVFRALAVM  
PITRSRPGTITFSWKSRAITYAIFFYIVTTIIVLVVGYERLMILRSIKKFDYIYSVLFVAFVLPHFVPIPVGWSV  
AHQVAIYKTNWKGQVRYRYRTGENLKFPNLKTSIVIISVGCLLLAVCFLLSLCALLDGFLLRHTTAYYHIITMIN  
MNCALWYINCKGIIKIASQSLSNCFSRDVSIECTASLISSYRFLWLNLSELLQSLGNAYARTYSTYCLFMFFNITIA

VYGALSEIVDHGFRFSFKEMGLIVDAAYCSTLLFI FADCSHKSTLKVAAAGVQDCLLSIDVLSVDRPTQKEVAAGVQ  
DCLLSIDVLSVDRPTQKEIDHFIQAIEMNPAVVSLKGYAHVNRELLTSVCINS

>HarmGR1

MNKEEHGFRVYNTNTVHKNETRKREMFQRIDEKDGIKEYDAKDLYGPEITDKD GALLDAHDSFYITTKSLLVL FQI  
MGVMPIMRVPKNAQTTRKTTFNWISKATLWAYLVWSLECIIVVKVGRERLANFQSSANKRFDEVIYNIIFLSILIP  
HFLLP IASWRHGPQVAIFKNMWTHYQLKYLKITGTPIVFPNLYSLTWGLCVFSWGLSFAVILSQHYLQDDFELWHS  
FAYYHIIAMLDGFCSLWYINCNAFGTASRGLAMNLHKALEAEHPALKVAQYRHLWVDLSHMMQQLGRAYSNMYGIY  
CMVIFFTTTISLYGALSEILEHGLSYKEMGLFVIVGYCMTLLFIICNEAYHASRKVGLEFQVRLLNVLN LGAVDRST  
QREVEMFLVAISKNPPIMNL DGFNTINRELF TANVSFMSTYLIVLMQFKLTLLRQSARKTLKTIVRAVFN TTTTIL  
DDDFTD DDEE

>HarmGR2

MTIPDHLFDEGINNTLLQHDMRHVQQNRIVYEKTQREYEQEQRDM LSSQDGTCEIHDQFYRDHKLLLVLFRALAV  
MPITRSRPGTITFSWRSTATMYAVCFYIAATAVVMIVGYERIMILRSIRR FDEYIYAILFVIFLVPHFVIPFVGWG  
VAHQVAIYKTNWKGKQVRYRVTGENLKFPNLKTTIVMISVGCLLAVCFLLSLCILMDGFLLRHTTAYYHII TMI  
NMNCALWYINCKGIKIASQSLSECFRRDVEAECSAKLISRYRYLWLNLS ELLQSLGNAYARTYSTYCLFMFANITI  
AVYGALSEIVDHGFGFSFKEMGLFVDAAYCSTLLFI FVDCSHNSTLTVAAGVQETLLSIDVLSVDRPTQKEIDHFI  
QAIEMNPAVVSLKGYAHVNRELLTSAISMIAIYLIVLLQFKISLPRDPQIVAT

>HarmGR3

MTVPIPNGFVPQINSKPKNKIIFLDVTPVSTPIKPHSPNVVAPMRNNLVAPHISNDI IYENIKPVFTLLRIMGVLP  
ITRPSACVNQFQIASSSMLYAILVFLSLVS YVLYLSLHKVQILRTAEGKFEEAVIEYLF TVYLFPMIAVPLLWYET  
RKIANVLNGWVDFEMVYKQLSGRTL PVKLYKKALAMAVIIPILSTTTVI VTHVTMVHF KPMQLVPYVFLEILTYML  
GGYWYLLCETLSICANILAEDFQNALRHIGPAGKVAEYRALWLRLSKLSRDTGIANCYTFTFVNLYLFLIITLSIY  
GLLSQISDGFGIKDIGLALTAFCSISL LFFICDEAHYASHNVRTNFQKKLLMV ELSWMNTDAQTEVNMFLRAT EMN  
PSQISLGGFFNVNRTL FKSLLATMVTYLVLLQFQISIPDESQNRDEEEVPYNITSATTEAMTTSTTTIMT TVLT  
TLAKKKKKN

>HarmGR4

MEIKLCKLFVVLTGEGIEYMKGNSVKNLNEKKRDDFLPTLNNVFLKARFFGISGYGLTISFFWSLILFSMLVVMESV  
AIWRVVTL LGEWLV SASNNGLI GRLSGAIFYGNALISLFLSSKFVHSWRSLSNYWL RMETSTALDFPADVRIRKRT  
IYITAFVVSVAVVEHILSMISATGVGFPP EEFLYRYVTLSHGFI LKAQDYTIWKAIPIFVLSKLATALWNFQDLII  
ILISMGLSSRYNRLNLYVRHVVSVEKQFESKQRFGTLEYLQIQVWRR LREAYVRQSTLVRMVDRNLGSLVLLSNIN  
NL YFICLQIYLG IHKSSGSTISR CYFLFSLGWLIFRACVSVLAASDVHLHSQRALKSLHACPSAAYNVEIKRLQYQ  
LAHDFVALTGMGFFSLRRELLLEVA AAILKYELVLIQYDK

>HarmGR5

MQNGWNNVISNISVGSVNTVNYLFR TWERLAPNRNMDLYSLEKFKKYKNDWNYPVHVRYQDQVMAEKEKPRMTFQT  
AMKVTLTIGQCFGLNPVQGI REKDASKLRFKLLSGRCLFTFFSLIGQFIMAFVLFLSLFKETSSTVDTASNFGFTT  
TILFFRIATNWPKL CMHIAKVESVDPN TDKLGKKFNIACISILFLALMEHLFSELHGISIALDCFPDTPVYESFM  
KLSFQWLFGFI PYSDFA GGM AHFSNLQCTFNWNFADVFVIMCSMYLTARLEQVNQRIIAAKDKNSPSSFWRMTRED  
YNRSVHLVRQVDKIIGGVFMSFASNLFVCSQLLHTLAGGIKASQCKPEIGADRRFFYGYEHSIYFVFSFSLV  
IRSLAVSLTASKVHAASLEPAYS LYDVSSANYCVEVERFLDQIHGDTVALSGLQFFHVKRGLVLT IAGTIVTYELV  
LMQFTGITPTTSPESVSGVIK

>HarmGR6

MGQTSFRRNMSFWIPVKKNKVDVAKPKVKNITSFQDALRVTVIIGQVFSLLPFVGVFTNVASNVKFVKTSWKCVYS  
LLSLVGQMFM AVL CINKLAKTTVSLNGTSPVIFYVTTCVTMMLFFQVARRWPALVQHISKAEDMDPNFDCSLTRKC  
NITCAVVLILALCEHILSLLSAFAGASACYS GMDTYEGFVTHFYPPWVFSYLPYSIVLGVITQFLHFQSTFIWNFS  
L FVICMSYYLTSRLEQVNRKLLAAQ GKYLPEIFWRATREDYCRATQIVRKVDEVISGVVFISFANNLFFICLQLFN  
TLEDGLKGTGECTPKLKKI VVSKSGPLGGHEAAAYFLFSLVYLLSRSAVSLIASQVNSASSVPAPVLYDVSPVY  
CVEVQRFLDQVNGDKVALSGLQFFSVTRGLLLTVAGTIVTYELVMFQFNSSTPTLNITSPTVVTHTITTLAT

>HarmGR7

MSSRGFGQFLRDGNLILPEQPNHDDFLTVMEKVFKWSCLIGVLGSKRHINYAWSGFILLVLLFMESQAIWKVIKAL  
AGWAIDTAGQRSVTARLAGTIFYTIIA ILSLVLSRLYRSWGQLSALWARVERIMAVKAPDKTLKRRMYFFLG FMT  
VCSLLEHIMSVVSAIGLDCPPALIIKRYVLI SHGFMI LRHEYSDWYALPIFMSTLASLLWNFQDVLIVLISMGLT  
SRYSRLNQCLAKICALERKQMDSDKKNEATKVYAWRKLREAYVKQAMLVRKVDDAIGSIIILSCFCNFYFICLQLF  
LGITQSKASEPIKTAYYFLSLGWICFRVLCVVLAASDINVHSRLGLKYIYTHDSHSYNIEMGR LQDQLSKDYVALS  
GKGFFYLSKSILLQ MAGAIITYELMLIQFDDQGTDDVQLNLTKNAIGV

>HarmGR8

MSSKEFKQFLRQNKLLLPQQPFHDDFLDVIEKVFHWSCFYGVFGSKRSISLIWSTLILGSLVIEVLAIWKVIRAL  
AGVARDMSGHRSVTARLAGTIFYSISILSLVLISKLYYNWRTN IAGLWGKVERS VGVKIPVDKTLKRM SFVAGLM  
TFCSFFEHALSILASVGFD CPPSLILKRYVLVSHGFI FMGDYSEWFAMPLV IISTIATLLWNFQDQLIVLISMGL  
TSRYRRLNECLAKFCELEKQHMDSDKKVEAVKVYTW RKIREAYVKQAMLVRKIDVALGGIIILSCSCNFYFICLQM  
FLGITQGMSTDFLTGVYYMVSLAWLCIRVLSV VLAASGVNTHSKLALNHLYTYETHCYNVEVERLQDQLTKDYIAL  
SGMGFFYL NKTILLQ MAGAIITYELVLIQFDDQGNDGIALNATNI

>HarmGR9

MGVESAKVEEVTAAPVPSESGARPSRPTHCVVGAHA FILRISSFFGLAPLRFESRSNGFTV SISGAMCVYSYILV  
TVLVICTIFGLVAEINVGVELSVRMSSRMSQV VSTCDVLVVVATAGAGVYGAPRRMRNMLKF MENIASVDTSIGGQ  
YSLVTERKLCGIIILAILIFFSIL IADDFTFYALQAKKLDREWDVVTNYLGFYLLWFVVLILELQFAFTALS VRARF  
SAVNDALALTARQVSI PVEKPKSSSPLNIYAIRVAPVDSQRSANVSLLVD TMTGREHVVIKRTASGEPRLVVSPC  
DAVRRLAALHGTLCDVNSIDDSYGLPLV VILISTLLHLIVTPYFLIMEIIVSTNRIHFLVLQFLWCVT HMLRMIV  
VVEPGHYTIAEGKRTEGLVCRLMTSAPSTGVLP SRLEIFSRQLMLQSVSYAPMG MCTLHRPLIASVIGAVTTYLVI

LIQFQRYDN  
>HarmGR10  
MEYGLDAKISKELESINFRVLQETQLDDEAKKRSTKWPWIEEDNKLVGKRRIDVKDQFTAFQKAMKVLLVWGQTIGL  
NPVTGILQKDPSPKMRFTVYTWKFLFSLTVAVAQTIQTITLCIYKLFREPTSISALGFVTFFTSTCFTTFLFILIASK  
WPTLMQDIVERSKLDEYVDKIIITKCRITCCIFIGMALMEHFSLILSRVARVIECSQNETDHGEVVFVKVTSWLYDL  
NVPYVAVAVMVQYVNLITTANWNYSYIFIVCVSMYLSILNQINKRIALEAQKTHVPAKIWINLREDYTRATHLV  
KRFDDVISGIVLVTYANDLFFICLQLYNVLSNMSKAAQLVNKLCPDQDGTFRAYSYPAYLIYSVLYLLVRFLTISI  
VASGVNTASLLPAPILYGIPTTAYTKEVERFQONQVNGDVVALSGLHFFYITRDLVLTQLN  
>HarmGR11  
MPSKFLFKTFNMATRHRRLDKREICGLHSTVRGTLFCSRVMGLLPVSGLTCPTSRRLRFTFRSPYTVLYVASLFGQL  
LMFVMTLCWLMNGISLANITNAVFTYSSLISSILLHIGRCWPALVGSVETLERELPPFHRNVASISNVTIFIL  
TAAIVEHLLSVFYGLKVACACDSNNVAENYFRFNMPWIFDYTPFTIWKGALSELFNISQSTFVWSLNDLLIMVISIY  
LTEHLLIHNEELLKKAEEHFSCLEFRTQYLKIVRLVKLINGQFGIYILTSFGSNLYWICTQLFYSLSRQTGHFI  
TCTFKDSPTKVPPANEYENPLCPWMLGEKALNGVEHSIYFTYSFSFLLRLTLVLLLAARIHSNSVAPLYVLYGI  
PSSRFHIEVERFIAQINNLKVAMSGLDFFYVTRTMITLLGTIVTYELVLLQFNR  
>HarmGR12  
MKVHQLTMRRSNKRCGLHVCLRHAMRLARWTGFFPLQGLGQAYADGTRYKILSLYFIYNFTTLLGQLVMSCFAILL  
FFQVEVTLNLSISNVIIFYVTSLSAVLFLKLAKQWPRLMARATETEQGLTELKLPNKVIVKCCVIAYVAMALALVEH  
ILCTSNLTFVMHCLKEAGITTNVMENYVHRMPYVFNYPVPSLFWAFLFEYLCLQSTFVWSFNDVLITCFSIYIT  
AYFRSLNQVVTANSKKDKDNMIPWSTLRVHYSKLVRLVKEIDNHISSEFILLAFFTDLFYICLQLFNSLHRNYASF  
FCNELQTKQALTSPSYLLYYLSFIFLVLRTMLSLFASNHVCAALEPVHAVYDVPSTLYDNEVRRFQLQLHHTKV  
GLTGKFFYVTRNMVLKVIGTIIITYEIVLLQYTITPNPYNGTKVILNISHSYS  
>HarmGR13  
MSAFRDTECVVTGTLSMMLRMSQIAGVAPLSFRRTHGGWYIRTSRANCYKALSFCFLWFLSSFTIAIDILIQPER  
SFRTRTNSTRIVWLADVATVAIVVCAAFTGISRMRCCLTVYALKLEEINLRLSLFHEEPSNEANRRLIAVSSMIFV  
VSTILVDYSIFIYQVITEHGKIVTSCMYIFYNISTIVQQVILVTFSETVTSVLTSLQMLNCLKNLLQEILDSSSEL  
TNCALNYDSYINMNPNSAIPNKSINSVDTMAVYKGYRKNSIKAVPSTIRRLALLYCSICDVIRLVNDSHGLILV  
ALMLCLLLHLVITPYHVITNIFNKERSDRSSPLLQLNWAHLHFNLLIIEPCHRTHEEMEQRHLISQMI RYTPS  
EHGVLLTELQMFYQHLLILNEVSAYPLKMFSLNRSILIVTVI  
>HarmGR14  
MRKLNLTPLKYLLIIENLTCVFRNYLCLRKCTRCLVTI WVVFETGHMFFNVYYNIVHGOAELKAQRIYFFSSSTAF  
SIYVMTSSLYFSKRFYKLLSNFDEFYNIFEDDVYNKKMKRAQKVMIMVVCFIGIKFIVFYIMQVKTEDELENGLVS  
NTVSEYSVTVNDFRYIFQYFILD CILLIVAEQLRAISRSIDSELSAMMENQRNVGHVEGLPRVVLNYESKINKWAQA  
YESINESTHL CNSMFVQLTIMLLIVTAYYIILLYSIAIITVEGVHTVKTLVMNLFMSVFLALLVISRAGQKIQ  
NSSQQLRQRLCELCVHTLGNEEYKLA KDLLRCVRTRPVRIHVFGTLDVNMSMLPSIVVLFTSYTVIALQFNNVL  
>HarmGR15  
MELVKLEMFIIKAIMIFRIVCGLYCKITSNKIIAAIKIYCALVIVIVFVISLSYLRALKNSASSAFAGMPASKYF  
VNSVHFCFDGDNFYEFHSLKNLQITQDSELKYDIPITIFLFI SITGARLKNYSRYWLGMSDGHFRFDRFMSFC  
FGVLISYIGSITCVMRFMMFELLWRRMAMLRKRLEQDLLNARRFENE EGVL RKQLRACLSIYKGILDSTRKNDAPM  
KLLVTHLYIIFLNNVFQY  
>HarmGR16  
MAFVKSETFIKVILIRILSGYYWKISSNKLVSVLLRIYCLFIATAFLCSMYQFYLFVSIPGKIHMCCICYLFSIN  
VATNLI FNGDNFVYFLQEIRNVNIPRHIGCGDKIPITTVLIILTI FLRIGSRIQFDDHTHIDIMQGVFSIQNFSLT  
FDFLYSSYLTRIMMFELLWQRITMLRKCLEQDLSIARRFEDGEQLLRNNLRACLKIFRSLVNTRVCDAPMKLLV  
RDSVLY  
>HarmGR17  
MALVKPVALIKLVMFIRLISGFYCKISSNSKINFLVKTYCILIATLIIFLTITVAFVRVNIESKCHIGFMSTLYII  
SVVTSICLNGDNFEDFLT KIRGITTLPNVESADKITFSIFLFFLSLCSRIVVNVKFTIDNVQSISDPLFYVSLVSL  
TLATLQYSASFTRIMMFELLCRMVILRKRVESDLSIPMTYQAKEMVREKIRKCLHTYKSLDITIRGTDMPMKFLV  
SFLKNLIEINRMQRVYKPGVHAPQIPSV  
>HarmGR18  
MFIKAVMIIQIFCGLYNKISSNRIICAITKIYCALVIAAIVIIAVIHIFFFNIFIVAKSSVVISVTTYVLYAMVHF  
YFNGDHFNEFFYSLKHLQTTHGSESKYDISITIFLLISISSARLYGYLKFTFMHISILPIDEFTGLFLDLLVCNIS  
HTTCVIRYLMFELLWRRMAILRKRL EQDLLNARRFENE EGVLRRQLRSCLSIYNEILDTRKNGGPMKLLVIHLYI  
IFLKIVPLKLTNITVLLVPQTLNMFGLLKNAGSELTVVDMYILFFETLSPALLAEMVQSEIECMKLSIVKQL  
LVCKDERTLNAIQDATTYLEQNPFKYTIWRVFAVDMSLILNMIALLTITYTVAMVQFAHFYD  
>HarmGR19  
MASVKLETFIKSVIFLRLFCGLYYKLSNKITVALTKIYCTFVAKIIITIFVLFIKNLKVFPQIYLSFGLMCSGYL  
TNVVFSA YFDGDNFMKYFSALKEIRNPQDFPSFSDIKISILLFFASSRIFNYAAYSVSAMFTFQNPFPYNIYTT  
TAFIGSIAVLHSLVNSTRMMTFELLWRRMAILRKRL EQDLLKARRFENEGDILKNL KQFLNTYKSILDTIRISEK  
PMKLGTVVTNNKSSYLNTNHIAVNILR  
>HarmGR20  
MVFLKQEIILIQILLVYRLICGFYFRISANKIVAPLFKVYCIFLASIVIAKT VWLIVNNKLDLGTGFHMCACS LYV  
SHVAINLFFNGDHFIDFLEKIKNINEEDTCAPRDKILISAFILFITTLVRFYSYVQLEYDFFKRFFGSLDSVFTFS  
LLVDVFQYSSITITRMMFELLWRRMGNLRKRL EQDLSIARRFDEGDEVMKEKLRSLHAYKNLMKITFETCTPMKL  
EVIYMRFVIKNLKL SFILKRLYRRF  
>HarmGR21  
MEATSVFGFHRSVLLSANSITMAFVKPETL FQVIMVFRAILGIYHKISPKNKLINAFLRVYCVIVAIVVHLGTIYIM

QFFNLTEVHLIIILNLFYSVDAVMGLCLDIDYLGKFLQKVRNMDTEHFEMKLKAPVTVFFIFYILIARFYCHTKFRY  
DNGESFFSPLFSEASLGLIFDLVRYSSIWIRILMFELLWHQMAMLRKHFKTELSVARRFEEGDHMRKLRSCMTSY  
KNLLNASHKFDPVVKTVQVRV

>HarmGR22

MADIKPNQMIKAVMILKII CGFFCKISSNKIVITLARVYCLFFGLVCM SMLIILANHA KSFSALLQVFFGVVYLI  
YFLLNFYFEGENFMGFLHKIRKVVT SQHMKPCEGVQISIRLFTISLAANILLRLKITLDQSHYTFSSYSTSFLAFVS  
TINLLEFSPILTRLMTFELLWRRMAMVRRNLERELSTHQGYENSECILKEKLRRCLNVYKCLLEVTRVNETPMKIA  
VYNQKLKYARRSQRLSLIS

>HarmGR23

MVARLMVGFYWKTSNKL VNALVKTYCVTIATVFNIMSITYITNEDEHIPTANTIYMAFVICLYDIIIVVNLFYTG  
EYLEDFFDKMENPAIAQDMEAGDKLIVTTAVIIFSLTTKFITGSIYIYEKFTLTNTSKNFILLIMQIINPISNFT  
IMVFELLWRRMAMLRKSLQQDLTSARMEGEEIFKTKLRTSLIKYQLILDTLKKIKHPIQFLVIVSFMNYVKSSYH  
MPDKKKLFSVVILFSDFKYSSLYSTCTASYVWFYCIWRS

>HarmGR24

MVARLMVGFYWKTSNKL VNASVKTYCVIIAIVLNILSINFITSEDEHIPTINLINMAFVICLYDIIIVVNL CYAG  
EYLEDFFDKLENPAVPQDMEAGDKLIVTTAVIIFCLTTRFISCSKYIYETYIALNNTAIDIHCLLLIMQIINPISN  
FTRIMVFELLWRRMAMLRKSLQQDLTTARIFREEEILKMKLRTFLMKYQLILD TVN KIKHPIQFLVIVSLMNYVKF  
SIHMRDKKKLLSVVYLIVRFFQVQ

>HarmGR25

MVARLMAGFYWKTSNKLVTALVKTYCVTIATAFNIMSITFITSEDEHIPLLNQFYLA FVLCLYDIIIVVNLR YAG  
EYIEDFLDKMENPAVPQDTEAGDKFVVSIAVIMFCLTTRFMFYSKLLYKSLIDPSDLSISRNFILLIMQMIHPVSN  
FTQIMMFELIFRRMAMLRQSLQQDVTNTRIFGGEIILKMKLRTYLMKYQLILD TINKTKQPVKYLVI V

>HarmGR26

MDVQATPASIKTIMFIRLLCGFYCDISANKIVTVLVRYCVAIITLVMAFGIYLWNGIIGISSKIHFLFITTPYIT  
SMVTNICFHGEYFSEFLNKMENFNLTGHFLSSIKIPISSLFFVFLQRF LFQMKFTFDAIGLPFRGVLTHASFIL  
ILCLMNYTAEFSIHIMFELLWHRMGMLRKRLEQDISTARILRDGEESIRENIRTCMRRYQHLL ETARVTDGPVKFL  
VDTYIFITAR

>HarmGR27

MYSVNAI IYRFIMGFYTEFSSNKIINFISKIVCVLLNIFITTKLFSLIDYNIVSSFIAFAGYSIIYLTNALASLF  
NSKWIQTYVNDLKSIGNAMGTGADIDIPIIRIILLCLHGLSSTQIVTCEHEFCSGFYQKINGFVYSLATAMATIL  
HMVVFELLFHKVRANRKYLENQLTI FKRHQNIMDLKNNLR LCM SNHVKLIDSLDKTDKSLKTTFFVADLAVIPIIM  
SRVFEIVKSPDRSALVNILLIGKGVVLRSM PGILADLTSREIDKMKHII GQNLLVYEDDDVKYLLKDTHLFFE HQP  
FQYTVWRLFSINTAMNVVAFKMVVSYTLAMIQFAHFFG

>HarmGR28

MPSFRESGLESFFTLKGILIMRSIFGYYYKFSNSVPISVLLKLYCIACCIIIWCHIFVWSDVNSRAAFYDVTL LIE  
ITINMLISL FVEDEFSTLNDLIASLPTKQNLRLTYAVI ICTIIEQVTAFTYGRSLFTAEDAALYMFQYISCTYGR L  
SLIYQAHNNEKAIKTLCDSLDKIEDMNM DAAEKRGHVEKFIDTFKQIINF SFD AKQVMKFKVAVLGYVCDFFRV  
QFMVYIYIEFHLKIQVTLMLPWYCGVAYSIFIICLPSMLGELANYHLDEIKVVLVDEVIRNEGTYFVILGLRFD

>HarmGR29

MPSFRESRLESFFTLKGILIMRSIFGYYYKFSNSVPISLLLKLYCIACCIIIWCHIFVWSEVNSRAVFDVTL LIE  
ITINMLISL FVEDEFSTLNDLIASLPTKQNLRLTYAVI ICTIIEQVTAFTYGRSLFTAEDAALYMFQYISCTYSRL  
SLIYQAHNNEKAIKTLCDSLDKIEDMNM DAAEKRGHVEKFIDTFKQIINF SFD AKQVMKFKVIQFISTSHIFVK  
FKIMQ

>HarmGR30

MAYLQKNLHIVKFLEPLMSVKTIMLIRISGGFYHKISSNKLISCITALYCLAITAFLSVNLTLNYP SYFILVKNY  
VGFLIYYLLVGICLLTDSGYFQNFLNEIKKIDHMLGASSNIKVPIS SFLLLGIITGVTGMDVLYVIYEVENNRQEK  
GFFITLFCMSLLVQTCAIANYTNVMAFELLWYRMRI FKQFLENTL KREFRSQDEEIKINAVRNCMVLYQRI LDTVN  
KNNLPMKLLTFVLVTKFIPKTVATLYDITNAIPEVSYMLIHEFFVDFMVLCAPIFADLICGEISSIKSMFKKQL  
LTCQGTFTNCYLVLAKRSQ

>HarmGR31

MDKSLYKLLLRFFFGHYFKLSSSKRICFIAKIFCLFTVIYISVIFVKFLLFGSVISSAINLWILLIEAILSIFL  
SLHTEEAYVLKFSAKIKNYVSSSSTCRVTNVLAF LII PINLFYLLAAYQEFSITNNLLYNITFTVCYCSYLTSLY  
ITEMFASAINNLTSDTVIKLDVDITDEEKRFCIENFLDNYLKL MNINVTATVSRIKVS V

>HarmGR32

MPWLKGTEIESFFTVKGILLFRLIFGFYFKLSNSIIIDLLIKSYCFLCMILMWLHII FVPNPENPAARVYDTLLAI  
EITLHIFLSLSKNEFGLDLIHSFDSAILQTKPRCLISYSMIFPVVFLEIYVAAFIINWNETKF INITMFYYQFVAC  
YASRLAAIFQSENYAHATKTLVYQMKENFESNMNSAGCEHVQQFNDKITITVDFFDKHRNVTRFKVKHLCSIFF  
FYIKK

>HarmGR33

MTDDTLVCDIKNVLFIRFALGFLQNFNGTSKTRWLSYLYTICFLLFAVLSLFPNEVIYVSYRILALIEYFFLFMI  
SFLSKEEYIYESYKLIYGLDTIPGAKLIFQNL EYCLKVYFVSVFTGSFFTGISICFRIQEACSITNSFAVILTIL  
DRTARDIGAYSLIMFIGLLYSRVKLLRN YLDTKSANTAWDRYSVKQYINMYESLTNTIDDSAVPVKVTVCFSCTLL  
L

>HarmGR34

MTDDTLVCDIKNVLFIRFAFGFRQNFNGSSKIKRLSYLYTIFFSLLFTALT LFSNDLSYHLSY LILALTEYFVL F  
TVSFLT KDEYIQRNFKLIYGLDTLP GAKKIFQNL EYFLKVSFVLGLANILFFATMICFRISGLCSIANLLSFFYIL  
LHRLACDLGDYVLIMFIGLLYSRVKLLRN YLVTKSANTAWDRYSVKQFINMYESLANTIHDSAAPVKVTVCFSMYS  
SSELSIN

>HarmGR35  
MMIDSLVSSLQYIMFLRFIFGFRLCDNSSPQMRLFTKLYPVLFFIVLNFVWSSENVLNPTLRYSTVIEYCAQFFV  
SFLAKQEFVNKNYQFIYIGIDSLPGAHNFKRLRVFIKFFCLYYILLRLLAILQLVVYVGPLLKNVTADIIYFHVCD  
IGRLNIFLVCILFCRVKTFEMNFQTTIDVVVLDKYSVKKYINMYQTLIDYVESMDMLFKLMVIFFIYRNDRFR  
>HarmGR36  
MIGDSLVCNIKYVIWLRFAFGYLPNFHGSPPKMFASFYTYITFLFISFTTIVIAFPYKFPWFVRVLALLEYTHFL  
AFVTKDDYLYQSFRFIYIGIDTNANVRKLYRNLEVFVKFIILYFLANKILVMMMLCYRLPSICLFSNTLDFSVNII  
RLACDMGRFTVILSIGLLYVRSKILKMNFLTQSPNTICGRHSVRNFINMYESLINTFDKIKTPTNITVCFVITY  
>HarmGR37  
MIKNNLVVNIKPIMIFRSLFGYRQKFNSPLKSNFFDVFSLSISFFMWLSLFFFKTYFPLVYVMSDNIEYCICFFVA  
FFTKEEYIYFFYKRQSSIDNLPGAEKLF SRLNLILRAFVVCFLT KIVVIIILRVFAPEIFQLGLYLDIVMGLSQS  
MSCDMGRFTIILMVGLMYCRMKIIKDNMDMIGSDLNRNRFVARNFIQMYQSLVCSLQRIDVPLKVSVSPLFSINQK  
>HarmGR38  
MTDDTLVCDIKIVLFI RFAFGFLQNFNGSSKIRRLSYIYSIFFLLLLTALLLAHNELVALSYRIMALIEYLI LFM  
SFLTKEEYIHQYKLIHGLDTPGAKKIFQNLNFKVSVFLGLTNNLLCASFCFRYPKTC SIATPFFVPIILH  
RLACDVGGYTLIMFISLLYSRVKLLRTYFDTKPANTAWDRYSVKQYINMYESLTNTIDISAVPVKVTVCFSMCS  
LVSIN  
>HarmGR39  
MNSNKKVCNLHHILYFRLIFGYFYKQPTLKLRI LTKLYIALFISGLTWLFITKVNGMLYYLQYCDILEYITFIIYS  
LITEDSSLLRSYEEKIKIDSLPVAKQYFRQLEKFLYLLFLICGLRLFASSLCIYAFEICKMAPFGVSVTNTFLT  
AMDWRHLNTVIWFSLLQTRVKILKNTLEIQGFDRGPMQRFSPRMYIKMYEELVGFSEFNGYAMKSIVRITSH  
>HarmGR40  
MTDDALVCDIKNVLFIRFAFGFLQNFNGSSKTRRLSYLYTICFLVFFAVLSLFPNEVIYLSYRVLALIEYFILFM  
SFLTKEEYIHQSYKLIYGLDTPGAKKIFQNL EYFLKVYFVSVLTGFSVIGIVIYFRIQDTS SITNSLIITILDR  
MTRDIGAYSLIMFIGLLYSRVKLLRTYLDTKSTNTAWDRYSIKQYINMYERLSNTIDSAVPVKVTVCFLMHYPSLE  
LSIN  
>HarmGR41  
MILKYLKINSLLKIIYSVNGIIITRFTLGFYTEFCSNKKIILL SKIYVVLTI LNVSVNHIYTKEQNISATLSLS  
FFAIIYFMNSTASLIIDSKWIKYVNDLKSIRQSMVADKCFDIPISRIIMIYQAFTLMMILVYCHYDICRHHIYL  
RVIEGYAVTSTVTITVPTLVVLELMFYAIRENRKCLEKNLSKFNTSGSVDDLKKNFRNCMSNYTKLRDCLKSTDA  
PKTMVSMNEV  
>HarmGR42  
MTDDTLVCDIKNVLFIRFAFGFLQNFNGSKIKRLSYLYTICFFILFAVFSLFPNELIFLSFRILALIEYFILFMIS  
FVTKEEYIRQSYKVIYGLDTPGAKKIFQNL EHF LKVSFVLSWTNNLCFSSLICFKIPEACSI SYLSVSPLLLHR  
LTCDAGRYTLIMFLGLLHSRAKLLRNYLDTKSANTAWDRYSVKQYINMYESFTNTIDISAVPVKLTVSYSMFSPSL  
ALSITLSR  
>HarmGR43  
MCILYGFYSYIESEDPLYTIIFTFVDYMSCDLGRFSLFIIIFGLFYCRTKGFR LNMEGEGTDIPWDSYTVKKYMNSYQ  
ALYNSLFIA YKIIITVVRFKAYLFVARLFLQVG  
>HarmGR44p  
MIGGNLVCNIRSIMLFRFAFGYRQKFNGSFKL RVFSYIYPITFLIICNL DIFIISTLSLYXIANILEYSIYFFVAF  
LTKDEYVFKCYEFINGIDNLP EIQKLYNLNKIIKLG PWLFLV LKNSIMCIIYAFYSESEDNPLYIIFFTFVNDMS  
RDLGRFSLYLIFGLFYCRTKGLRLNMEGEGTDIPWDSYTVKKYMNSYQALHNNLFIAYKIFIKVVS YKVYLVFFV  
LQVGHRKIFIA  
>HarmGR45p  
MKSMIFFYCINKALLMYSLCILFPNICHGPLKL VFIADHIYGMGADLGRFGFLVLGILICRLKTVSMSFKNIATE  
VSRDKYAVKKYMNMYETLINYVEEIDTPIKFTV  
>HarmGR46  
MVKQFINKLKTQFQYFGLNAVLFFKLIFGSY YDFSSSVILRRFAKAYCIFVIIAYWFVIYFIWTVNSKISLAFFL  
IVMTVDAAANILFSFITEEKYVIEFSSMVL FESGLNDRNIYFYLQIFHLVIVISSYLKRYYSIYAYAVAFVNISAY  
NNRIISFYVMNTFKDAVRSRLRLSLSKHFKNKNLTS DQKLLQINKFLNAYMKLLRIIDKVFKIIRFKVSFCTICDII  
FLPASNFLKCFVCPVLDCLCIDSRLQNIRYIIPWISICISGKCYFALFIYLYAYR  
>HarmGR47  
MFQQIMIKIKNKIRSFYSLNSILFVRLFLGLYKLSESIIRLF AKIYCILYLILYLI FVKIYNTTDTDNFTFEFY  
GSVIL IETVTNILFSLFSGELYVMKFLSSLPESDLYSFGVPLNLIICHSIKVILEYLFVPIPVFIGWVYLSVHMTI  
YNSRMTTVCMMLRQAYKSVSGTLIRNIMRRNVTDEEKITEIKIFVKGVMKLGHNMSIDINITRFKVRF  
>HarmGR48  
MLQQLLINLKSQFRSYPLNAILIYRFIFGLY YDLSSSAILCLFARLYCILIL IATVYTIN FVKAISPLMSVTFYA  
MTKIINAIVNMLLSLITAEKHEIEFSSKVLSETGLRHRNFYRNLI FCYLAVNVSV CIEHSEAPTTYPISFLNIT  
NSRATSGYILQIFKDTVRSYRLSLINNFKNKQLTSQEKKYELNKFLNSYMKLIINLERVLKIARFKVRQLNGNFFI  
TGLGK  
>HarmGR49  
MIAKIKYILKQ RSPWILKLVTFCLFYGQYLKISESKIICGFLRVYCIFISSVIIWGFYISYTKNVIYYGFAIEY  
VFTIVIYFILIYND SIFKFYNNLEIYDRIMGFKEIPH FACYMIMFLIVNAIFRPITGFFRSTYIFSTW IQRISVGGA  
LCIIE MNMF GIAHFFSLFHQRMQLMRKFLESNSVPVNITGMDEVAVSVRNVKKSLYYYDKLLDCLQSLDIQVQIMV  
IVFII FVF  
>HarmGR50  
MEMLSKLKLLSSCVDHFLPILRLGFR CYSRISDSKHVCYIAKLYTVIIFIFSTSGFLYWHRSTVISILLATQYCV

HAIYSFVTS DKQAFR FHR SVKTS DAIMG FKNLPYISKPVLPVIYITVLLWMFYVYFWIDDLHLSTYIMTICSDLN  
TVTVGILLIGVFSRMPIMKIALENNFVPVNI V GKDQLQKNVKIVRKCVGYSNLLDSFDVIHTQFQFTVSDFMKA  
SCHYIVQ  
>HarmGR51  
MQEVKKLTKTQISAMWLVIFFTSARAFLGCKYKISESKLICFLFRIYCFISFSLVAYYFRDNIDTGSSSHMLVII  
EYIIIVIFHMFTGDTYMRFTFVNAIKMNDRIMGFKGIPFTFKYVYLLMFLGTVSKTVAGSFRYMYSLATLLRCLTIG  
AILVSVDNFQLTIIISF SMLHYRMKVLRRFIDSNSVPVNI TGRDKVAISIRNTKMSLFYNNLLDSLQLINKELQF  
LVKNKFCY  
>HarmGR52  
MITKIKYILKQRSTSKWIIKLATYLCLLFLGLYSEISESKIICGFLRAYCIFISSLTVWAFCVTNTTNFISYVFVIV  
KYVS AVVFIILHND SFIKFNNLEINDRIMGFKEMPYFSIHGFMFFMCNSIIRTATGFSRNTYIFSSWFQKLSIG  
GALFIIIEINMFGFYFFSIFYERIKLLRKFLGNSVSVNITGRDEVAVSIRNVKKGLYYDKLLDGLQCINMQIQM  
MVNAFNIFVFDCTLCYYLYYTIAIIAT  
>HarmGR53  
MISAIKKYVKNDKLFMWLT KSYIFMRLLLG VYVKISESKLICVFIRFYCICIFFVFASIFTYNPENYSVLFEAAEY  
VFLVIYHFICENNSFVIDVIKINDRVMGFKETPLVNKYLSFYMVLSVLRYYTTGQLRYTYHFVSWNEHISLGIAL  
ISVDISMWGSIAILTMIHDRIKILRKFIQSNKVSVNITGRDEVFISLRNIIKKS LHYDKLLDSL DLVNQLQFQVN  
VLFRIVHIKYIC  
>HarmGR54  
MPQYSPTAILITIQSVTVIYGYITSEKHAIRFFTHVITSDAIMG FKNLPFVRNAVLPVLYIFYLIWGFALYYRWV  
DLIRLPTIIMLLATDFNALCTGILFFGLYERMQLIQRTLENNFVPVNI V GKDQLQKNVKIVRKCVGYSNLLDSFD  
AVETQLQVMVSGLMKVIEQIRCSSLHKIATYEGVVLFLKIYSVIFLGSICVALPRAVLVAGI  
>HarmGR55  
MDASKKLKFILEVSIDIFLPLTRNLLGYYTKLVDSKYVCYFCKFYCVFVNFYLVLTQTYLHGFFSVRDLIVFQYSV  
GAIISFLKADVCGVFFPKHLKTS DAIMGFENV SFGKRSVIAPLYFLYIARQIMVYI I WFDAMSFPVYFMCAASDLN  
SLLISIIYLSIFGRMKLLKKTLENNLPVNI V GKEQLDKNVNIVRKCVGYTNMIDAWNII DNDMQIMLAVALLTN  
TPIWIMNFYAVVMLFLQPTGQQEAVKLVQGNILSLLMATSPTIVSELISNEIDA IKATLVTLVRCSDPSLSSELE  
VALHYIHI PPFKFVICRAVPVDINMPTIIGFCITYVIVFMQLHFSNL  
>HarmGR56  
MIVKRNNFIQNRQPSLWLYKFITILRCLLGNYREVS KWKPICYLFLKLYCIFICSVIVVSFYLSHYSSNFTNYIVIL  
EYVAIVFFHFVCGDNYIMSFSDVKINDRIMGFEEIRLPNYVCYVGFAGLLLRSTVSIIRIPIVGNLSRYYSITSA  
ILSTDINQLTVIVIFSIIQDRIKTVSTFIASNSVPVNI TGRDEVAISMRNVKKSMLYNNLLDSLQHINKQLQFLV  
TTFLTILKIFGNLVGFIPCN  
>HarmGR58  
MKVNPATVKKQESKPNMEQLEESEYNDKIAKVMSMKTITILEYSYGLFKFQFTNGQLQPINILIKMTAFLSIAAY  
IFMLYINVCLTNGTFFLGSYTVIQFVPSMVVLLQYIIISTFKNFSISESLLNIRIFTTIAKLD SLLRVEVLNDFYEI  
LRSKTNLIMLIFVILHAANFVLEFLT SNKTLWLIFISYHLHMTQEIELLAFFNCVSMITYRIQLINKFLTFFNNGQ  
EQRDLTVFIVREKNNEAQEKLNFVGRVSETNVKLRDLATMYDIIGKICLMINKAYNLKLFMILVTAFTFILVTIWQ  
ALSFYQSPQYCTQDFVKLSLWCFSTVCNLSALAFVCERLLRARNKTRILVNKIIMNYDLPKTMRVQAKAFMELVEA  
WPLRIIYIDMFSLDITLLLK FISVATTYLIVIIQIFHFI  
>HarmGR59  
MEAEYDNKNKYFTRMTLTKSHEKQIIETLNI FIIFEYFFGIFRFRERVNEELREP NWKKVLSFCITSTCAISFVAY  
SVITLNIVMRATMREAIYINLTCITTMLLQFCSSALSSSTFFNFNTNIRIITTLANLDVMLQIEDYKNFYKKCLFTT  
YKYVTVFITQVTL SII DGFTMYLGWAVPA AFLDFSQRILTILTFCKYVDLLRRLKIINNYLKAFTDECEKETITV  
FTLRSRTNKTQAINFIGHASDNNTKIRDL SRMYGMIGQACSMVNKI FNLILITILFNSFIFIITIMWISLVMYRN  
SSDNLGLYINVVLSFFCWISYLLFITITCQRLVSLRNKTKILLNKIVMNYDLPTTMRDQAKAFMQLVEAFPLRIHV  
YDMFSIDISMLKFISVATTYLIVVIQIFNFF  
>HarmGR60  
MKEKIKGKLNSSPEKFNIRSVKRIVDTINVI IKA EYFLGIFRFTIVHGS LREP NWKLKILSALIVLICSTLFLLLS  
ESYYGLSSHLYRNFTDSTVINLSYFVMAMQYSIHAIITITFCFNASNICIINMLANMDTMLKAKILNNFYKKS L FQ  
SYIYVLLVSTQFSITTLACCTLNTSWSLIAGILDIVQRLEIVIFCRYIDLRLQRLGVINNYIKKFVSEQEKEPSAL  
VFTIRNRTIETTETINFIGEASESNDKIRDLAKIYGTIGHTSSMVNMKMFNFQILTVIMSTFIFI IAIMWTLCKFYR  
NNYSNTGYLLNLILSTMFWISYIALMSITCERLILLRKETKSLVNKIVMNYDLPTTMRDQAKAFMQLVEAWPLRIH  
IYDMFSDITLILKFISVATTYLIVVIQIIKFF  
>HarmGR61  
MQRFVMKDNNEVKAKEPSESNEKQEENKYNDKLAKIMYTKKPVTTILEYCFGVIKFYFRNGQMHPNKKIIGKTYVF  
FVVLYTFVLF EYFYEP IQTNDLNSKIVLAALPGIIVFIQYIASSIKNSSNSYPKLNIEIITTFAKLDTLLQVEDIN  
NYYNISRSKVNLMVFLPIV FHSVNLLLEIMTYTYQIW PPIIWFHLFVTQKMEIVNFLHIVYMSTYRLDVINKMLRT  
FILENRQKDVTVFIIRKKIKNTQTKNFIGSASEDNEKIRDL SAIYNIIGNNCSLTNKVYNFNLLMSLVTA FVFI L V  
AIWQTLTSLYQSSSQYDMKDIMKVTLWCCNTVFNLAA LAVVCEKLLRTRNKTRILVNKIIMNYDMPTTMRDQAKAFM  
ELVEAWPLRFFVYDMFSIDITLILNFISVATTYLIVIIQISHFI  
>HarmGR62  
MENNMTEEKNQENKQNM EYSEENECKIKIQKVMYTVKPVTVLEYCFAMFKYNFCDGQLQPTKTGMKIYSSLCIIVY  
ALVFFRFFFM PAVGYPIITLVPPICAFIHYVISSFIAFFLSGSKAYICIFTTIAKLDQLLQVDIVKDFYKKSRSRT  
NILVFI AVS IHALNCFLEIIGDLKEYVMTLTSFHLFFTQRIELASFFNCVAMVTDRLNVVNKFLDTFVTEQDKDI  
TVFIVKERKKESKETLNFIGRASENNVKIRDLAAIYDILGRTCMMINKAYNFSLLMILTNSLAFILITFWQALSFY  
QSQEMDSSDLIYMAVWCMTISNLIALAFGCERLLRARNKTRILVNKIIMDYDLPRSMRVQAKAFMELVEVWPLHI  
YIYDMFSDITLILKFISVATTYLIVIIQISHLI



>HarmGR63p

MEFQLEEKIPSYRNTNKRREGEEQIFNTLKIIKIEYFVGIFRFTLLNEKLSRPNWRMKSISIFIITISVVWFFSFA  
AYNLELPSVDVTSYKFMNLICIIFMFLQFFASASTTFTNTSNICIIISMLAKVDTMLKVENLSNFYKKCSLNTYI  
YLTfVIATQILISIIDILTVRISWAITAGILDFVQRLEIAAFCSYVDLLKCRNLNIINRLKTFVDDQEKKATAALT  
IEFRSGIIENFSFIGQFRENNTKIRDLAKIYVMIGQICSKVNEIFNMQILTILIPLYL

>HarmGR64

MEFQLEEKIPSYRNRNKRREGEEQIFNTLKIIKIEYFVGIFRFALLNEKLGRPNWRMKSISIFIITINVVWFFSFA  
AYDLELPSVDNVT SYKFMNLICIIFMFLQFFVSASTTFTNTSNICIIISMLAKVDTMLKVENLSNFYKKSSLDNTNI  
YLALVITTQILVNITDFTLVHISWAITAGFLDFVQRLEIAAFCIYVGLLKGRLLNMVNHYLKTfVDDQGKKAATALT  
IEFRRGIIENFTFIGQVRENNTKIRDLAKIYVMIGQICSKVNEIFNMQILTILMNTFITIMDMWTCCLVMYRAPTS  
PKLGVLINVTLSCTTWISFIAMMSIRCERFLYVRNETKILVNKIIMNYDLPTTMRDQAKAFMQLVEAWPLSIHIYD  
MFSVDISLTLSFISVATTYLVLIQVIKFF

>HarmGR65

MEFGKDQDNESNIDQDYSNQKKIVNIYNNIKRELIFEYFTGIYRFQLIDGELRTPNWKLKALGIVIVSIYTAAFI  
WFIIPDPSDCMTGLHVLNNIDDFPCIVVLIQYIASMITCNFLMNSKNIRSIITLLGEVDITLQVEKIEDFYKKIES  
KLNKYLILLILTHFIHGVLDFVSSDDIVWEMTILPLYLNQKIVVLIFCSYVIMLNSRLRLINSYLREFIQEQDKRS  
VPVFTVRGKTKEKTLNYIGRPSIRNTKIRDLATTYDIMEICFMVNEIFNFQIFISLVTFTFIVITITWTSNLV  
YRKPDYQSSQLINVLIIWCMNMCNVAAMSFACERLLVLRNETRILVNKIIMNYNLPKTVRVQAKAFMELVEAWPLR  
IYVYDMFSIDITLMLKFISVATTYLVLIQISHFI

>HarmGR66

MLDALLGMVWAFVAGIITFVQRLEIITFCKYIDLRRRLQIINQYLKTFANEQDSKYVTVFTMESETIKTKETVN  
FIGNASESNTKIRDLAQMYGMIGHTCSMVGKIFSLQILTILMSVFILLITIMYSKQSHRLPNFNGCLWSNGKCSSF  
IFLLDFLLGFHVIQM

>HarmGR67

MANVKKVEPNPKVENKKCDQKRTMLAIINTIKPMLFVEYLYGIHRFYFIKGQLRPPNWIMRAYAVIHTGSFLVLF  
AFLNFPVAVFSGSMKIVEIMDEFPPIVVLEIEMSSTIIATFVVNTVNISIFIKLAAIDAKLQAESLSDFYKKS  
YVLLALSVSHFINSVIDFVTADDITIKGMIVLPLYFVQKLETFTFCKYMYMVRRLTIIVNDYLRAFVEEQEKNSA  
NIFTVTNNKVEKKREVNFIGRASDTNTKIRDLATMYDIGKICHMINKVFNFQIFMTLVSTFTYVVTITWTSLYYY  
RKPGSNLGEINTAVWCCSAIYTVGIMSVSCERLLLVRNETRVLVNKIMNYDLPKTMRVQAKAFMELVEAWPLRI  
YIYDMFSVDITLMLKFISVATTYLVIIQISHFV

>HarmGR68

MDDDKEQDNESNTVKDDVKTDENPKNMVEIINGMKTELIFFEYCCGIYRYQLVDGELRRANWKRKALGTILIIY  
IVFFWFLFMDPDDDDLHFFMSTIEELPSVVVLFQYVSSVIANNFIFNSKSIRVITLLAEVDTMLQVEKFADFYKKI  
SFRLNKVVIFLIISHIVNTAMNFCSVQDVAWGITVLPYFIQRVEIFIFCGAVYMLKCRVKIINNYLKEFIQKQDK  
KSVTVFTVGAKPKPDTTLNYIGRPSIRNAKIRDLATAYDNIGEICSMITDVYNFQVFLTLVSTFSYIVITITWTS  
NFYRKRDYRIRQLINVMICWCFNMIFNVAAMSFTCERLLVARTETRTLNVKIMNYDLPKTMRVQAKAFMELVEAWP  
LRIYVYDMFSIDITLMLKFISVATTYLVIIQISHFL

>HarmGR69

MEDTTNEDTNYAKEKEKLISESKQILDTMHLINVIECINGIFRFSFVNELLPPNRIMKMLTVFCILIIYVIFV  
CFISLSPLSDDEFDVALVIQFSITLDFLQYAACTVTATFLVNSNYIRIIDSACLDTLEIGKLSNFYKLSRFET  
YKYIFLVVFTQGLRAIADWFSDASTILYTLNFLLSFIQNVEMTFCKYNDMLRRRLKVINQYVQVFADEQEQTAT  
VFIVKPKNEQEKEELHFIGRPSDDNTKIRDLAKMYNAIGQICTMVNEVFNFILAFATFTTYIILNMWTCCLHYR  
IGLNDLGMLINITSSFFFWILYVVVISITCERLLLVRNDTKIQVNKIMNYDLPKTMREQAKTFMELIEAWPLRIH  
VDFMFSVDISLMLKFISVATTYLVIIQIFNL

>HarmGR70

MEPIDKTEIRNRAAKILHTLKPITIFENVYGIFKFNLVNGDLRPPNWKLKTVAVIYMSIFCYLYVVKHYSQDFVES  
TTKWSREYIMKQVPAWFLVIQYVVSCLKASFPDKSKSDIHIKTFAECLLHFETLNRFYAKSRSTNIIVLILL  
IYHLLNFVLDIFSDYDPRVFLEAHIYLVQKLKIVGFRLMYMVTHRLDINGCLNKFILEQERANTTVFSITKRQ  
KRMKDMFNFIGHPSESNVQIRNLALMYNIGKQCCMINELHNFKFFMILLAAFGYVVVTIWTALSYYQTQQFNATG  
TVIIAIWCLSTICNLTAWACEALRRERRRKTISVNMIVMDYSLPKTMRVQAKAFMELIEAWPLRICIYDIFSID  
ITLLLKFISVSTTYLVIIQIYHLI

>HarmGR71

MFVTIKKKPFNIIIGNHNHIEALSRTNFFRRFSGISVFTLKLSDADNRVIRGFSKFGFTCFLTWLSLYIYCTYRAHA  
EDQTVLRVLFSTKVQRYGDDYERISSTIYVIFAFWKIPFRLNINNGFMGMVVKVDKALEELGATVNYNFDALLALS  
MSISQTFLCVTRLSSVWLTLRHLGVPVPSEKMFQVILSDSLALIAAHFSFFLTVLRRCFRHMNKILQDIKNHKS  
W EHKLFIRGSMFSNPQKAVSLQDKFICEKIKACANIHAMLYQMTDLTNKVFGSILMVTILYQTYTIWFMFSFMEAT  
AAGLFHIVERYVFCINVFWEIGYATFITFMVIYVSERAVYEVSVTHRA

>HarmGR72

MSATMKVPVKNKYFSYPFKLDGCKNIVEALSRSNFFRRLGGISVFLKVGSDNRVTREISTYGLLFYIVWYAIYVY  
CTYKAHYEDQTILRIIYSTKLQRYGDDYERISSTAFIIFAYYKIPFGVNINKVFISMTVDLDKALENLGENVDYRL  
DALLALVISISQIALSTTRFFSIWLTIIYQLDVPIPLERMHQVICSOTLALIAAHYCFYVKVICKRFQHMNKILED  
IKNHKSWEYKLFTRGSMVANVQAKGLEDKYICEKIKACGKIHSMLYKMI EANNKMFGSMIMLTVLVYISYITLYM  
FYFMEATAAGLFHHPDKYAVLFVYVWLWEIGYASVTIYVIVYISEYAAEVS

>HarmGR73

MKFDHNVSLKQMLWLKIIFFQFCNWSSSVYVSFAKLYCISNYLFIFIYGSIKMSHFNQYSASIRLNYITSIVELN  
VDTLFSLIHGEEYVRRFVKMLEKDFPGLQKFKYKYVVTIYLSLIGLVGFLIFFTMDIRGGDNILKPCLFFNRSVACY  
FCRISVIYVIEGYRNTVSI LRKQLNTQLNMNNITEAQKTVFIFEKTHSFIKLTEHFDSAMTIRPLTIFRFVIDFC  
KILNIIYYISFFDISSFVISWTFEVIIEMLSLCCPMLILESAAADDLDEIRKIIAKELLTYEDYYLRSVIYESMEFV

DGYTTGLNVWNQYPMNKDMVLAFIGLITSYVIALLQFSY

>HarmGR74

MNITESKTI CYFMKLYCICFSAVVIANFYFIEVHEKNIYSLIFVSIVEYALISSLSLIYGFNLFNFFTAIKTNDR  
IIGFERMSLITRYSYLIIFVNSVMRYVITVSFGSTYIHSLEHFFVFLAAIALDLYYVTIIILFALIQRNMKCLRL  
FLASNSVPICITARNNVANSIRNVRKSLVYNNLLDYLEGLGQQQLQYMVHFLFIYFFVLLLELVKDTISYLSLFFLL  
QIFVNWVCYTSRVIILLYSITVFYSTGVS

>HarmGR75

MITFQSFLSKDLTLRMLQIIAFLRLFYGNVVTISESRAICYLVKLYCIGVCSFIALFGFYAITQLYSFTTIIISFTLI  
DYFMTALIFVVFSDQPILHFFSGVQTQDRIIGFKKMSYINKYMYFILFCTSFMRLAFFIHRITSYRSNLEFILVV  
YILTATDLNYLLIIIFSVLHNRNMNRLRLFLESNSIPINITGQNRIAISIQNVKKGLIYYDRLLDSLQSLDKILQC  
QLMVYSITQFLRISMMYSRLIQQFMVEYILLRSTINVLELIPTALFVFAPLIFVEATTYEVERIKTILTAQILRSS  
DECLRFELQTALQYVRLRPFYRTL CRAVPLDINLI FT TASLCITYVIVACQLVYFSK

>HarmGR76

MKPIQNFLFRDNATLSELLRTIAYLRFLGNYVHVTKSGGIRYFLKLYCICFFMSVMSIYVYTSVPFQFTVFSFT  
VFEYILTAIVFVVSDDKHIHDYFINIITNDRIMGFKKMPYMTTYVYLILFSSTITRFCLCIIRIHTNIHTVITFCA  
ILISITAMDLHYLLVIFLFSILHTRMNMNLSLYIESNSVSVNIIAHNEIAKSIRAVRKSLSYYDKLLDSFENLAKIL  
QYELIIYWVTEFLRASIIITYNGLQGLISSKGEHLVLQHSNSVMTLNLMEVIIISVALISFPAPIVEATVYEVNRIKK  
TLTAQILKCSDECLRFELQTALQYVRLRPFYRTL CRAVPLDINLLFTTAALCITYVIVALQLTHFAA

>HarmGR77

MIPEQLPNQQIVSEWVLKIIAACRLLGSYMNITESKPICYFMKLYCICFSAVVISNYFTEVYENHTFSVFYVFI  
VEYICMSFLSLIYDYKFLDFFTTIKTNDRIGFERMSLITHYTYMIIIFVNSVMRFGITVAHGSTTTKSDLGHLICI  
LLTFTALDLQYLTNIIIFALLQNRMKCLRLFLASNSVPICITARNNVANSIRNVRKSLVYNNLLDYLEGLGQQIQ  
SMHYTDLFLGTLTIGVHVKVMIYSPALIVEVTIREVEKIKAILTTQILRTSDECLRFELQTALQYVRLRPFYRTL  
CRAVPLDINLLFTATAFCITYVIVALQLNHFAE

>HarmGR78p

MAIQYSVHAIYSFVTSEKQVIRLYTSVKTSDAIMGFKNLPYVSKAVLVPIHITLVLWMLFIYLFWIDSLYLPRYII  
AIASDVNLLTVSLLLFGLYSRMRVIQNALENNFVPVNI VGKDQLQKNSNPMHGFTLAIINMASIIVSTSPAIISEL  
ISNEIETIKATLVTLVRCSDPSLSSELEVALHYIHIRPFKFVICRAVPVDINMPNTIISFCVTVIVIMQFIHFS  
SVY

>HarmGR79

MNPKLLFQFKSPTLCLIQIIALLRLLLGNYINLGHSKLTFRFLTCLYCVVCSSIVSMYILSLSERALFPVYSFIIII  
DYTCAVILSIIIFGYDRYPAPFLAANMTNDRIIGFKINLSLTNYAILSIGSAFLRICLIIAHFLSHPSILAFCSIT  
CAIAATDVNYIAVIIIFTMLHRRMKNLRTFLETNSIPINITGQDEIAISITNVRKSLLYNNLLDNFQSLDELLOQY  
AVSKYTIWRMFQITINWITNFSRTC VVVYFFVQHIIAQLYPSLVLISSPAIIIVETIMYEVDRIKETLTQTILRCSD  
PKCYTSIGISLSSVCHQTSVSGSSCRRRCSTCACVRS DTRSAARCRSTSTCCSPPPHFALLMSL

>HarmGR80

MDRASTFRSKLNVKRGTKLNPIFTKNLHSEVLLDNFIEKDLQSLKPLNIMYSVFICAKYSIRDNFITCNNFLYNF  
IGVFTTGLFLCISVYRICSTLSSKRIQYVIFEWNTIFNFMSYSLGLIMNYIINIRFSDKNIQLVVKIQSVLRVLKM  
NRKDLTCLLVYNWSGVLAINALIVGSIAYMMYIFFPHVDILDVIYFYSTIVFDVNIMYSLVFVANFSRKALCSWIND  
VLQSGDDSDFYWNRMFNVYLNMLDIYTTLEVVFQYSVRFHYLEIFLNY

>HarmGR81

MHNLQPKMKMLKMKKIIQKREKSFDPNRI GF DYQLDKELHQIVNSFNFALNLCFSSKYYVQSNHIEARGMKYRLLT  
SCYTIIMGLLCIYRIVTADIRDALMSYSENCFLRFLSGLYYTDYLLGFILCYILDIVHSHNHIILVAIFKVIHRSI  
DCSKIYSRFIWNWITLCTTICIDLFIYVMYGGFFARFSLIENISDCLCDVMFITFYINYIIAIRVIIILKVYLDE  
WILNIRNLSNGLDRDEVCLKLIRVYNDIMKAYDLYKSIYQLLVSSLMNHLFQKFSVAFLECFIFADSNSRTGHIF  
AKFNVLSDHHPQEECTGRR

>HarmGR82

MSSITRYDVGTGNSCHSVNSRCPVNKVVDLQSI FLPLNLLQILVLNPKFYIRKNLVKPNDC LQKLILMCGLVIFL  
SGYVYRVTEIILDDNLKRYGSINFLYASYFDFVFYSSGFIMNVIHCKQSSKMVTFVLIFQKIHVFLNTGSIKRS  
VIRNWTNVTVIFVFYILVMLFSSLSIYNQASWNFALNLLYLASLDSNIIY AISLMRLLVDKLELWSVRVLTSTDG  
NDVTYRYQMFEAYKQILKCYDLCKDV FQQQVSQVNLNAYSETYIDSVES

>HarmGR83

MYVRSVEDIPTLPINRLHINNMVDNDLQALLRPLNLVPRLLFCASYRIRHNFI CPNSFLYNVLVVFYFVSFRCLAL  
YTVIYLCIYIVDFHGGSKIFFTLDCLDFTIFSIGFLINTYVCFKESDNNILLILKIQYVLRNLNVSRCLCKSLIA  
SSWWSVILIHAF FIVSGTYCYFYFSELRITDVLTQYPTILFDVNVVIYASLLIKLLEKTLRWIEAVQKQNI DNSER  
ERHLEMLFDVYFNIQAGAYKIDKTFQIQVNIYFHVLLIIKNVMTMLLIKNYESIKNIKYFVLVFIISQTWLLKSIVV  
FIYLSVECFERFYAAMRDVHDTSIMLMNSEQFAELDMRVYKNIHRARRSLFSKLDGCRLFQVDAELPLQLSRLISSY  
IIVCLQFAFL

>HarmGR84

MKFDHNVSLKQFMWLKII CFQFCNWSSSVYVS VFAKLYCISNYLFILIYGSMLMVYLGQYSASVYINYVTANTELN  
VDTLFSLIHGEEYVRRFVKMLEKDFPGLQKSYKHYVTIYLTLMFIEISIFFIMDIGERQLQSAMFFNKHVACYF  
CRISVIYIMEGYCNTVSILKKQLTTQLDTKNVTEAQTKTVFIKEFTRSFMKLTEHLD SAMKIRPLTIFRFIDFCK  
ILNIIYHVCFFDFSRFILSWCFEVIIE MFALCCPMLILEWAANDLDEIKRIIAKELLTYEDYNLRS AIYESMEFVD  
GYTMGLNVWNQYPMNKDMVLAFIGLITSYVIALLQFSY

>HarmGR85p

MFSLLNFKRKQQSDPVLTKAPNIPYSEGLLDNRVEKDLQSVLRPLNLTLGIFICSKYSIRYNFITPNGIYYNICG  
FVCVVIYCSYSIYTTVSSSIELVQLKNNFNPRLHWSSIIEVFFNAFGLMLHYINN VKHRCNNTAIVLKIQFAIKVL  
EFNSNELKSLKFFNWLSIIILNGICLVSI AFFSYFFFENLRF FGILSFYCSVIFDVSLLYAACVIKLLRKLAAWN

DHVVRSKNILDSQRESYWNTMYDVYISILEAYMIVEKSF GALFTFLAIIAKAWLCKSVVLGIILSLECEKFYSAMK  
KVQITVTPLIQSTRYLESQLPFCCKNIHRVQLADYEKMSACGLFTVDAMMSLRLFDFITTTTIVIM

>HarmGR86

MPFYTI FNSRIAARRRSLTTANQRHEIETNEGLGRENVEKEYLQRI FQPLDIMQAI FLSTKYKIRDNIITPIGRIY  
SFISISGEFGLMIVYYFLYIHTDIWTDNIHFI FGVD F ILYFCGVLLNPLVNV IQKLNNVLLVLKLQNIHRVLNM  
NENYFKHII ISNWIFSFTVSNFQLLWLCGYYYAFYNIGVDNILT VYICIRFDMNVVYATRTIKLLCKSLEKWTE DL  
WRSGYFEDSDDQYWD RMFEAFLDTIKAFHIIETIYQQT VGF LNSNHS DLKYGFLTFLSLSWLMKNLT LQTL LSVET  
ERLYAAMREVQSSC ILIPTLKQPSVYQRRFYKNIQRVQEISFKKMSMCR LVTVD AELPLRVLHTITTTFTIVILQFE  
FL

>HarmGR87

MIFTNNKISAKTREPEVLLDNRLGKDIQRMLYPVNLILSLFLSSKYTIKDDYITPKGKKFYIATFFFILLLYGLGI  
NRVFFEDI EDTMGTDNRD IVTII F SFAFVFYSIGFTLIFVLNIHSDCSISLILTLQKVFNSLDFSDKIVAITRWN  
WFAICIAFGT NVFLYMLYYVTYHDFNPVDLVMDIMFITFDINLVYGILVITWLRKILEKWIEDVLA FEDGDEEFYS  
EYFQVYRNILNAYNCYKTLFQLLVRIFSIFCFSKNLMYYF FLPVVYFLQVLFHTADTFFRCLCYFAIILQILQMPD  
STVYEQMVQYTVVKVVA AVWQIKDVLLVVMQCLECEKFYMAVEDVETTCIQRLLKKHHLAAEERLCSSVLQANRTS  
YCKMSACGLFDIDATPLPLDLIGLLTNYIVIMLQSFFL

>HarmGR88p

MSEKRKIVPYPSMPLP NTEIDKEMQGI VKSFNVLHLFFSSKYCLRRNNVYPRGTYR FMTVLHTSFLNGLNVFRA  
YRDSSIGVTVND FMRIMNCCYDFVQMYAFILLFILD FVHKQNHVLLILAIQTINRSFDLSKSIRSFI IWNWIVLFI  
TLCLESYMHIVYAIYAHSRFSDVIPDCICDFMFISFNVNYIFATRIIILLKIYLDEWVKFILI LNEREENNEYCL  
KLEIYENIMQAYNLA KT VFKNLISVSH TDLFFVWTKMLLSLVHCAYCERFYISVEEAECACIQLIKNINCPKS  
HKYLCKAVIRINRSFSKMTACGLFYIDASLAICFFGAVTNYAIVMLQFTF

>HarmGR89

MLAYFKKKPKSKVNDVI IKTLP TVQYKEVLLNNVIEKDLQSVLKPLDLMQRLFICAKYCIQDNFITSNSRSYNILG  
ITLAI TLRSLLFYNLLRIVSSEDQNNYVLA FSNIFDDVFFSIGFILNYYSNIIQCNNHVLLVLKIQEVHRI LRVNG  
KQLKCLII INWVYIVLVNVVYILGALFYCLIVSFARILDPVSNYCSIAFDINIVYTA FVMSLLRKTL SIWIEDIRT  
SKHVAIESYWTVMFDVYSNILEAFKIFEK

>HarmGR90

MTESGIPLTNKLSKEVQQIFQPLYLMQMLVLNPRYQLSNNFIHPNMWLNKFILLTSLGLYVSFSLYRIFDIYLYFD  
LTMFLGLGNYLQFASYFNLVFYCVGFI INFTNLFIH SKRYAVFVLIFQRIHTCIGNKASFSAVNISRIYVSIFFGA  
YFLMSCFVITIFKQTSWIVFNTAIMLTIDANMIYAITLHLLTNEVKLWN SHISMFSKKGSD EDQHKIMFETYLH  
IAKSHRICRTV FQYMVRYFIILSRKCSNGIGLNSSVFLHVPRSYRIHLHFHGDLC LDSKSRGHTNSAGPQFRSLLP  
SYRRCTRFLRSHDMVKQSYARTYCVSTVPVSAG

>HarmGR91

MITKITQMVKQPITEPDSSFRVLKDDRDLKELQHIVRPINFALHLFFSSKFDVRYNHIYPIGTYRLLTFCYTMIM  
IIFCIYEI FTFDNLVEA AFDYQKILVKFLHIVYFTLYV VQFLTWFVLDNVQTQNI VSFILMIQVIHRGIGCSTEFR  
SFVIWNWISLFSVLCVNLIIHIIYYIFLDDL SNMTTFIAFLLDILYISLDVNYAVAVSFIRLIEKYLEIWTKEVLK  
MNAEKENG EQRRKLLKIYHNIMDVYDLYKTI FQYLVCLK

>HarmGR92

MLHIVRKLQTAIKKVKCASSYMNTDNLAVNVIEKYLQATLLPLNIMQELFFCAKYQIQNDFIYTNGLYDIVSAIG  
TILYVLSL SFYLISSSFNKIHNLLDLVVF AIGSILNYFVNIMQKNNVLLI CSIQNAHRMLDINGMVFKRSLIFNW  
IYVIALNSFHIFWLFYYCYTFDDISIRDIFTSYLHICFDVNVVYAAK LLEINRKTAQIWIERIQQSVGNIVHCD SN  
NLFKAYLEILKSYQLIEKTFQYLVSLFVACN

>HarmGR93

MTVESCVKKN SITRPDPQVKALPGDFIDNDVKRMLRPLRLIHFFSFCPPYRLKGNLILPNSLCSKLLSFCVTMFFM  
FLFAYRCYDHRYIRQQRNVAFHTINSYVLVLISCFGVLSNFISALQSKLVNKFVLKIQDVHAFLNDSKVFKRFIY  
RNWIFVISIICYEVFGWISVNTLLKLSYMDVLCGAASMSFNVNIVNATRLIVLLQDKLNLWNRV LQLEGMESNSD  
TEDY CQKLYQKYIDIMECYDIHKL SFQMKVS

>HarmGR94

MLENRLDKEVERIAFSFNLPLNLLLSKYRLKYNRIYPNGIKYDIYALFCTFLFLGVLCFYRIFTLDMTNASMSYM  
ERAILTVVPILFFTIIYFIGFVIVFVSDIVYKDNNVLLILTIQTIHRSISFSKTNHSFNMWTHISFATVILVNLITR  
GTFYLTCRYSHVSEEISDIVRDFSFTTVDVNMVIATRIIILLKQYIDLWIKAILTTNVAQATDLYCQKLFVYMNI  
LKAYKIYRKVFQALVSDFYIFHLFI

>HarmGR95

MLSHLNKFWKPNKSATTL EHG TRESTENEPNSFVIEDDLQSILKPLNMLGYFFCSKYSIRDKLITYNSYIYEYIR  
VLVVIIISWNFYNTILLNKKMLDQHHGLICLGLGSMGFFLSLIGDTIITWSNIIQKQCNIILLVIKIQQILRVL  
QIYGNELRNVINWSWICVIVLNI FMSYFICYCVTIEEINVIGIIISFASVTYDINVVFAFLLKLCEKILRVWLE  
KIKLLKDN GDEASDEFWNRMLKVYLSLLDIYLMIESTFKHMASIS

>HarmGR96

MLTTKTRMQTQONNAEAVSCQILPKNRLEKEIQKIVCSFN FALRLFLVSNYCIKNNHINPNGKIYHTFAFFWMLFMS  
VLCVYRMFTLEEAVEHLEAAILVNLLFLYYAVYWLGFVTVIFIQNLVNRNRIVSLILKIQTIFRSLGFLKDIQSYII  
WNYVSLASIVCANIFVHVTFYISWSHIKFIDQIIDNVTNALFVSIHIYTIAIRV IILLRKFL EEWMSV VNTMNVE  
HDNNELCLKLFESYKNILEAFNLFKEVFNLLVSNRNVYCL

>HarmGR97

MSQTQINVATVSFKILKNRDLNEIQKIAYSFDFAVQLFLFSLYNIKNNHIDPNGKIYHTSGIIFMFLNLSLCFYR  
MHSIAGLRGKIEQFDLII FLIFFYFGWYCVVFTMMYIQNILHKNYIVELILKIQAIHRNIGYKQSLHSFVIINWIS  
IATIIISNIMCLITFCASGNYNVDVIELVSDNICHTFYVAHHINIVATRIII

>HarmGR98

MYQPNSRSDISHCKNLYNRLDDEILKIVYPFRCVLYLFFTIKYRIRNNRIYPSGKLYRIFAFCWMLFLNSLCILRI  
SNVEVRNNGKTKQLEYSILLVLCTGFFVTYFIEFTLMFIFDMINEENNILLILRIQNIHRSIGSRKTIQRYITWNW  
ISVAIIIFSDFAIRVLYYISSYYPHFMHSVYDAIIDAMFIALDVNIVITMRILVLLRVYLNNEWINNITKMKADDEE  
YRKMFDQYKNILLAYDLFKTVYQAFVGSVSTYLFNCCEY

>HarmGR99

MLKSQVLVNSLNNFIDKDLQSMMLPLSLMQNFTFCPKFKRIKNNRITPISYFHKFVAFVGTVMFIYFYVLRVYIQSFE  
KIFKNDFFELYTCCYCSFGIAINFIDSIIQTKLYVNVFLLIQKVHRLLNDEHHFRFYVISNWLRIIAVYGGFFIIIL  
IEVSVWIQMPYIIYIASCYPMVAFDLNLVYAIISLITLLKDKIILWDIHVSNLQAMQEENEPKKMYQTYVNILKCYEI  
YATCFERNVSGFFLVISLISLFLVLLPKLF

>HarmGR100

MLSSIKKTNLKNIALMVVKRPTVSSERRNKIEEDLESILKPLNIMQSLFICAKYSIRNRIITHNSKLYNALRVFCT  
CIYSCIYLYRMISQDHQTINKSWRKFWFGMAWIAGFILYVMGDLINTISNIKSHKNILLVLKIQHVLSILRISGT  
DLRIFVCYSWASVIIINIFISYVICYCFTTNIIFEIISAYTSIAHDINIAYAIILMKLNEKMVRVFMEELESSK  
CDDSKIEEYWNRLNMYLNILEIYNIWKTFQQMLVLLPLMAQIWNNAKMVVMCLSTECERFYTAMKDVETACTK  
IFKSRNCVHLTRVCNKNIQRGQNTYFKKMNACGGFYIDVHLPVMLSSFITSYTIIVLLQFVYLD

>HarmGR101

MSPARFQKISNNRLERDMYRTAYSFNLPIFIMLLASKYQFKYDRIYPNGKKYLLFNFVYMLFMNGLCIYQCYSVEMN  
SDRINFGLKIAIEISINFYIVTYFIGFTMMFITDFVFNKYVLFILKIQSIYVEIGSRSIITSFITWNWIYLLLT  
AINILLHGLFYSNYNERAFDVSIYIIRDFHLIVLDINVVLAIRIIVLLRKFIESWIQYISVKNEADNALYCRELF  
GIYVKILNAYSLEYELFQLMKPIIAILKVLLLVKDLGLIVHSEQCEKFMVAVTKSESVCIQLIKNGHFTKYQKRL  
YKNVIRNRVFSKMSACGLFDIDATLPIRFTEALTHYVIVLLQFNLY

>HarmGR102

MTETNDDSQTNNQLNMRPKYPKSKPCQVLPNNRLDKEVQMANSYNIALFVSVSSKYYVKDNHIYSRERTFLLFKI  
PHILFTNTLCIYRMFTININTLGSMGHYEDECMKILNVVYVYTFICYTFIFINDVVQQNNYVVLILKIQEIHG  
DCSEKIRSYVMFTYFGVIFTICIDSLIIVAFYMFDDTLXWFDIITTCYCDIMILSFNINIVISMRIIDLKLYLEE  
WTIEVLNRNVGKNDDQCIKLLKMYQTIIEAYNLHATIFEKLVG

>HarmGR103p

MSIIKTDIFTKMIIIGLQLICGFYCKISTNKVVNALVRAYCVSIAATNIVLILCELFITIIYRSGIGIVVFVATLYFL  
HLIIDLCSNCENFLKFVNIRQPISQDLQSDVSTPITAIVL

>HarmGR104

MIGYHQFYRLRFFIYFRIFFGLGNFMSFPQNFVLKLYSIVVAIIITAAGAFIQYYGTDTFHRVVVLVEYFAYSL  
ISFVAKGEDVRSFFQYLPSLDSFPGANREYRKMMNSVIFVLSFSIAWRITVTVIVLYLYSASLNTLVGMEIFFFIV  
ITVAIDLGRASTFIYFSILYFRLKIFKTMLRSTDFNSTRNISVVYKFIQIYELLADKFRKIQKVLKLQVSIARQIV

>HarmGR105

MFEPQTVCNIEPLMYRFLGFCQNFQHSRLTRILSKIYPIVLVVALIVKTFIFNDTATLYNKYFIGLEYSFNIVV  
SLVTTDKYINMYFKYYHTIDSISGAKKIYKNLEKLAIISVFYASSFRSWAFIVISRYNEAFFKGFDRSNIIELAVM  
YYVNDLSKITTLCTLLYFRTKVMKMALEATEFNDALDRFAVNRLIQMYETIIDTFEIVAQPLKFTVRSIIMNR  
YYLGVQGRFRPRWLFRKRKSASWAGHIIVHEHVRRHKCTPYIPSL

>HarmGR106p

MRKMELFARLCVIYSVFRLYTFHVFCQNAPPVSANSFETFDIAVLVFLNIANDMRRIMTLFCFVLLYCRTRVMKI  
ALDAIDFNDSIRDRFAVNRLIQMYEALVDTLKYIGYPFKVAVCIYSPESVNRQKKTIVILEIFLFSGYILFDLFLV  
IKNLRIDCKIITY

>HarmGR107

MNADLLKCFAPIHNVLLFLGSSRLKIKNNMIAPSTRYQKMYALCCIFIVTLSFSYIQLYLYLTYYHEDTTIYVCYA  
IGIMVQNVSYLSHTIFARFLDVNESSVKLCQNLQKVDNILLRLKQFKRYNEQQYYWNVVVLVFIITSFECGFLVHIWY  
TVEYPILAFFAGIGLLNVYMEVLVAASLIVYLAIRLKFLNKIAHNFKIKGYNNNTRACAVDEHLLINSDVKDAN  
IDLGNFLICMKEILKMYQHITQVFSFPVSRCTTRAKIIKVRASWRALSSRLLSF

>HarmGR108

MPRNIEELSEDFTDDFIRIFQPIFLVLRALGLARVSIKYRYPTGTSKWYLLYSNVFWLLNALSAVYFFFHCGESF  
DSKYADSTLKFGVLNSGINGILVVRNRLERNKFGAMYVKLQKIERHLNMEDTKSINKQLRSQSTIVMVVAFVFT  
IFWIVLFKYLEFMKSMCIPLIVNVVTSIGLQTEMAQIYFIKFIITRVNYINDMLRQVSLLSIEPLTKPMDDGILFV  
VSNTLKHQDGEVPGELVSGMHCIFETLSDFTLGFLQFSLFYFICQILAWNLTIVHYLVTSMEQGAADTDLCLCVMP  
VLVALQFIILTCLKAQDLSTKLEEARLCLIDIISSPLNGKSREHAKQLTLLVEGRRSVSIYNICTFGTRPLHL  
LAITASYTIVLLQLALL

>HarmGR109

MKNLKENIKIEYLSKIDILDEEFMKSFSLYYTQRLIGSTRVQIKHRFVTTSPFLQKFHTLISVVLLGLDYLVIQK  
YDKILFDRETIYYLSICVTGLQTITFLCNIINVRFIGDANVELLVNLQQIDRRMNINRNKSITTLVKTNVISLV  
VVLIMFITLLGVASAKGTAAFWPYTGIAYSQFSFVIELSCSNMFMFYVRARFINSIIKNYIDQKGTQEILYSKE  
RFLSSYFASKVFMRRLAAGSHNFVSSDSDVYLKQLLEGFFKQDIYKFQVFMFCKLVASALLTFEFLLYAVQNDT  
VGLWDSLTPSFFTVIDLVMAILLGVRCEVFIREVKETKRLVITVMSRHYDGRLEKSKRMLKLVEETPPHFSVYDM  
WQLDANVLLQMFMLVTGLIVTQMQFAFL

>HarmGR110

MISLKSIVITIKTLMAIRLGISGLYFPITSNKIIISLLKIKYCAIFTITVMYYILTCTYGLPFRYNLTSYSILTMYFA  
NVIHTVFHNGDGEYLNFFVAINKIDLAIGERPDDEIKISRLIFIVFLVMRTTGMVICYQSEYKKYCSLLRSLLL  
AGLFVSIAQWCHTSYIMMFESVYHRMRLLRKRFENRLSASRQFEADEKVMENQLRQCCLDIYKNLLGVTGLYGARI  
KIMVITQLFIYVHIFLAKMYILKKNLLIDLKIELIT

>HarmGR111

MSPARFQKISNNRLERDMYRTAYSFNLPIFIMLLASKYQFKYDRIYPNGKKYLLFNFVYMLFMNGLCIYQCYSVEMN

SDRINFLGKIAIEISINFYIVTYFIGFTMMFITDFVFKNKYVLFILKIQSIYVEIGSRSIITSFITWNWIYLLLT  
AINILLHGLFYSNYNERRAFDVSIIYIRDFHLIVLDINVLAIIRIVLLRKFIESWIQYISVKNDEADNALYCRELF  
GIYVKILNAYSFLYEKLFQLMKPIIAILKVLVLLVKDLGLIIVHSEQCEKFYMAVTKSESVCIQLIKNGHFTKYQKRL  
YKNVIRNRNVFSKMSACGLFDIDATLPIRFTEALTHYVIVLLQFNYL

>HarmGR112

MLFNGLPNTNVSVNRSSKVVPIITVKPTQRNNYVPSKTVSAIQTIKYQVCTALVFGINRLYLFPKNTFVLLLSYVYT  
IFLPILVWDIMFNADDSATYFVFKYTCCIEYVLLISISVFTSRSKLVNLLRDLDKFDSSLNIRKDLKVIDSGYIS  
VFWFCGCFIYSLCEYICCYFYLTVFIDRSVYCLYVMMLAHDCEQILFFVLLRTIYTRLRVIKAHVLLKVFSANRTN  
NYRRKLDKVEALSNNALQDIDSSLRHVYDLLHKCAEQNLSIMSLSVSFEELFAN

>HarmGR113

MNLFYVLIFCENFMCVYRNYFDINKYQRIVAITRIIVELTSLSVVITAHNVLLTKAVNYESTEKDVLLTMLFQILTL  
FKSIVIIIGGIMNSESFKQFYENLRKLYHCFENDVDYKMFEEKLRIKSLVGFSIFTFMSLVQMFGKIFQYYFLGTY  
QLTEIIVLVLYELWVDMRYSLEHVVFCAISCISDFLKLCLNISVNKVLNRFSEQPSLEPNSNEENVNLPEKVNNT  
EKYQKIMACCKNISLCYQELVSNHPLSLFMTRLGSASSLTACS

>HarmGR114

MSEIKLLTYLLHIENLLGIYRITNHHKNVKKYLITIQIFLISLLYTSVVVEIDLNIRRVGDGDHEIDDIYLISS  
SWYNFLTSLASSVYRSFESYYESINRVYDWFREKSNVTSMTKFQWCTLMFSSFTMFNLFQPVFALFKYDFT  
YPLFVAYILLTVSFLKITLLFEHFVLFSSIIILIVRVLKCLNHLVNAAEKRLRSQISDSECEIATKQIQEWASLYTD  
LANC

>HarmGR115

MTPIKLLNYLLFVENILGVHRKYNIQNKIKKYLIIFQIVIQTTFHAIITLISEIYLLFKEEKWKNYIDINVIKSCYA  
VTAHINAISAVLTGICYSQSFLSYLDSITRVSDSFQDDRKLAKSLKMMYLSISLMFLSISFVMYRVKEYLKRFSY  
MHPLIVVPVVSQFFIRSTLIVQPLILFTIIMIVAHLFRSFNFYFISVNVKRARSVDLSLEENDITREEIQNWVELY  
RDLENSCENVAIFFGHQYFFTLTMSISNSIMMVYHVGC SVLLKAITPDLRRMVI GLLNVAWSMLPVISGQVVRNQ  
AVKCHREFARLYNTVVIDPSEEKGKLIKDFIRVIKKKPLDIKLLSKLPIGMYMLPAMLTMGVNYAIMVLQINHI

>HarmGR116

MSSAKLFKYLLVFENILGIYRNYGNKNRKVCLIIIFQILVQTIYHIINVS GELYLLQKRLSTQTFIELGFVLSAN  
INASVTLVSGFLYSREFQKFHRTISLISERFKHEKSLKRSKLTLYFVTGIITGFLITSVILRAREVYVRHYSFSDA  
LLVNFMFPLQFLTRLTLTYQLIITYVYVMVVNLVKCFNSLISDGQRKVSRRNTSVLVNCGCDVTKEQIQDWVELYQ  
EFSNCCEDVTICHGWQASLFCICY

>HarmGR117

MADHLINLLTKTETIIGIYRNYDSLKKQKILCKLRIFFEILFVFSIATYNVLVLENFLSTRIFHYMMMYHISNFL  
GGPIVAISGILCSNTYKNFIDNFM TMDMHYQKKSAYVKCLKMKILFVVTCTISCLSI VFFLITKITARFFIHHY  
VNIGFVLMVAVFVQQRFFLEHTLMYIFIRMIQNVLRCLNDCMLDAQVGYNDMTRSGQSDSREWRPLLTAEQVQL  
WAEHYKCLLICSKNLSICFRSQVI

>HarmGR118p

MTKIQWCTLMFSLFTMFNVFKPVEAIFKYGYGFARPLFMAYVLF SVSFLKITMLFEHFVLFSSIIILIVRVVKCLN  
QLVNAAEESLRYQTFDSESEITTKQIQEWASLYTDLTNCKEVTQCFGGLVIFQQLLYSSVGANSHNVDSLTSVLV  
APFWQA

>HarmGR119

MIEDKVIKTFVISENIMGVCRNFAALTTSQKIFSIIRIVVEISAYIIISLFFLDKCNHVLIEGGHFLSLMMIYHP  
VNFVCGSMILLCPVYNPCGNKLFIKEFTMVQCEFRHTPFYAQSMKRVKSYIITCITFFSIIIVAILVLYTKVLLVFEW  
STFGPQSLYIGLITIEIIFEIRQTVESVTIFS YITLLQYHLKTINSCIASVVAQYDPLEARSDSQTNNDHLTVD RV  
QYWADTYEKISNCSKLLSQCFSTQVNFGLNSILLFIY

>HarmGR120

MSLLNNLIKSEN YMCYRNFMLMKNYQKIIIVLIRIFLELCATIIITHKIFFRDLGNVSSLLFVPYCYQALVLLK  
NLVIVVGSVLNSKSFIVNEKTRVLHNRFRNEPSYSKSVKILNLKCSVISIAFLILVFIVIIIRIYIISFNKDRFN  
KGRVVIILFEAWVDVRFMLEHLVIYTVITLIYDFLKCLNNYVYEDLKKYNIDTKDEEVHLDEQFNETADKLT VWT  
EVYQDILSCTKNTSICFNLVIKYEFI

>HarmGR121

MLTKIETILGVNRNYPSTSKTRKILFEIRIVLEVLYIIGFIYTYRTKIKFKDQGYLMEIFHLANYLSGP IIMING  
ILTSQQYKRYLENFIPVHAYYIKESKYAEKMKKIKTIFIIVTSISFAISCAGFLVKYYNRYVQNQEITFLVTIFLL  
SALLVHYRFMLENGVMFTHMAMLRNLLKCLNDCILDAQVGYSYFVQSGRSDRNEW RP LLSEEKVQLWASQYMSLLN  
CSKNLSVCFRAQVREPQIQ

>HarmGR122

MSSVKLIKNNLFGENMLAIYRTYDCQNRLMKCFIIIHILILILLNTFIVSLELYYLFDLGEPDQMSVVFCGFSIAS  
YVNTLSSIMSGIYFSSGFLSFMKSITFISESFKNDTIVIKSEKRLRWFSLLILTFPFGLFIRLQEVLLKKFKDLNL  
MILIPIVVSQTFTRMTLLYQPIVFFIVISTVVIYFKCLNRLISIATDSLKICRLRSGLHGECDLGRDQIEGWVELY  
RDLANCCEKVSICFGRQFSFSLVLTMSNYILLLYQICYMNTYHIPNDFEFKKIILV IISYIIMTMLPIFAGQLICN  
QELKCHRVL SRLYNTMLIYSNEAEVKLVKDFIRLMKKYPLDIKLMNKLPA GMYMVPAILSF AVNYTIVMLQFHHVI

>HarmGR123p

MTKQQWRITLMFLIFTMFFNVLPVEAMFRYEFTHPLFVG YILLSVSVFLKITMLFEHFVLFSSIIILIVRVVKCLNHM  
VNAAEESLRNQIFDNECEIVTKQIQEWASLYTDLTNCKKHVTQSFNCLLSFSIMLSISHFVLLTYEIIYTIYRKGI  
IITDDLQISFVILADTAVMTMPMIAGQLLLNQGVKLHRLRLARLYNVLIIRPEDSEAKLIKDFLRLKKKPLEVRF  
GSNYQAGMSLLPVMLMMSVNYLVILLQFNHVV

>HarmGR124

MIKTFLLAENIMCVYRNVVSFSGYKKVLILIRITLEI IWMLITILIFVWQVSEQFSTRNHFLYLMGVYHLTNALCG  
IALVICGVQYSES YKFLNNFEVIRHEFQNSPAYTKNIKKLRNLTILIVFFAFVSIIDFFFKLRANMITWRQNHI

KITFLTLLFTLVYIEIRKILVNSIHYANITILRSTLESLTDRVSEIREKLSKPGMSDRSYKLTVAIVDEWAVNYQK  
VLISSKLLSECAGCQVICTFFLICVLFYLYLCCLKSICFYFGYCLLLFFYPVHNVV  
>HarmGR125  
MVLHYSSNLLCGSMIILCAICCAGSHKLFINNLIKIVQREFWYTPTYIKGMKKLKIYIAVTTTFFSLAVASVLYSKC  
RNATIWMTPDIILCYIALLVIEIYVEIRQILESIIIFSYSMLQYSLKCLNVDVLGTRKQYNRLGIFLYVELKSSN  
FLNVQVEEWAAKYQNILVCSKLLSDCFSNQVSWYNSIKITLQTKQLADW  
>HarmGR126  
MLFTSKFSIAYNCIRPHRFFYYVFSFIGVLTFFILYHLQRLFNGNFATYNYLSLAATLNVFFVVIPFPIFYTLNVLQ  
REDNVEIILKIQNALKIINYKRYMIRTYWNWFYIIRHLIAYLIIVCITRNSQIAIYYYYTLNVVDVNVIIYGVIMI  
ELIRDGVIIVWSEVEHYSKLCLDLNEETYNKTMKKLFHAYISLMEAFDIFKGLFQYSVSFVVISWQICFTRDHLAPVG  
LHSLSEG  
>HarmGR127  
MSGAESSVVRIRIIIAVRLLCGFYTKVSSNKIVDALVRAYCVIFSMTVFSILCTVFSRVPLIKVTFMITFSLIYACN  
VILDHCFYGDKFFEFVRKMRHISISQDSRLRHVKLPITMFLTILLFCSRLFSHLKYMLENKYVIHMISSQSLGLAY  
DLIQLVSVLPRIILMFELIWRQMIILRKQVQQDLSSIRRFEEAGEELLKNKLKVFSNAYKNLLNSTREIDSASKLLVR  
NAILIEIAIKFVVIISPALLAEMVNSEIDMKMLCIVKQLLVCHGDSTRDAIEDVMLYLKQNPFKYTIWRFLTDMT  
MLYLKQNPFKYTIWRFLTDMTLILSFIVFTTYTVALVQFTHFFV  
>HarmGR128  
MSITKTDIFTKIIIAIRLICGFYKISTNKVVALVRAYCVSIATTVIVIIYEWFIISLDRSAVKILVFSSTLYSL  
NIFVDFCSNRENFMFLVKYIRQPISQDMQLVVNTPITAILLISTLCLRVFISHIKYQYDNGIWFAFISEETMLVL  
DILQYVSIQKMMMFELLWRKMAALRNHLERDLSSARRYETREDLLKNKLKACVDIYNNILNSTREIDAQTKFLVIN  
>HarmGR129  
MIQKNYVDKDLQSMLLPLNLMQNIMFYPKYSIFNNCIVPNSVLSKVVALCSTMAFVLIHLYRSYNLYYNQMIREFV  
NILYITSYFDIILSCIGFAINFIVSIYQTENNVLFILKFQKVHRFLNDKNLNFNRVFMNWILVLVLLFSFVIFIMSS  
FFLYMEVPLPDDFFCGLAAFCFDINIIYALRLIKLLEDKVKLWNFEAQHLLQIYHSNIESHCQRMFEAYFNILECYN  
LYKYSFQLMVCMPESLFLRYFLFHHLRC  
>HarmGR130  
MLPSLENSLESPENVHTIESISPEASNEETVNNKIDKDLQSVLRPLNLMQAIVICSKYRISDNKIKPHSRLYNWLG  
FTLVIAFRILSIHKLLTSNYPNSVSRVAFLYMINIFDFVFNAIGFFLNSYVNIHRYNNVWLVLKLQHIHRILNI  
NSKNLQMLIIYNWISAIISIYIVFIMYMCYISLFFPVFSVFGTIVTFSTISFDINVIHALLIKLLRQTLRMWILKL  
LDLKNTDTVSNDESLEWTQMFDAYKNILDVYKMIKLFKLMVSIFL  
>HarmGR131  
MKFYRKTEKTETKNVHLVFNLLDKDVQSIFPPLNLMHYIVFCPKYTIKNNFIPTSFIVKLISILGTLVFI  
SVTLYRNYLFFYQESVTISPFMYSSYYDALFYSFGFSMNCFLGIFKSELIIRSIMTFQNIHRYLNNESENTR  
RNIIILNWTYVIVTFVGYSIYTYFYQLSNSYNLTNAFFLVSF DINAVLAIRSLNLLDKISLWNVSI  
CKNQELENVDRNYAKKMYQAYNVNLECYETLKTLSRSFVST  
>HarmGR132  
MRSHTRQTRQHGIFFPFESILNNQLDKDVQSILFPLNLLQFIVLNPCKHIKNSFINPNN  
SFNKVILFFGMIIYVSAIYIRVLEITLDVNLRAYGTLISFLYIASYFDFAFYSTGFILNSI  
INFCKTKDMVNLILMYQDVNRFLKDKSNFRWSVIRSWIYVALIIGFYVFTMLFMSVAPFHIVFN  
LIILISLDSNIIYTIILLKLLTEKVVVWNSAILKVHKNGCSTSYCTKMFDVYVDIFSCYNLIKDMFQ  
QPVSLLKFFSTTFLIIYYEASKIFRLCYFVFRFYTKL  
>HarmGR133  
MLLPLNLMQTIALYPKYSISNNVITPNSAISNVLSLCATMAATVTHFYEGFKLCYDADVVFKYIASNIQYFASFFD  
IFLTCIGFIFYFFICIFHSKNNVLFVLTQKIHRFLNDEKISKRFICWNWITMAVVFIDIVVLT  
YFNLRLHPLTYTFVCCFLAITFDVSIYALRLMKLLSDTIKVWNMEAQNLRRLRHSNINQPN  
CQKMFKAYSQILECYNLFERSFQQIVCILMFYFFVLEPSLL  
>HarmGR134  
MAEKHYVDKDVQSMLLPLNLMQTIALYPKYSIWNNVITPNSAISNVLSLCATMAATIVHIYEVFELCYDADVVFKY  
IVSSIQYFASFFDIFLTCIGFNFYFFICIFHSKNNVSVFLVKFQKVHRFLTDSKRKRFI  
FWNWITMASLIIFDVAVLIIYHVKLHFPLYNLFCCLMSISFDVSMNYALRLMKLLSDKIEVWN  
MEAQNLRLLHHSNSDMHCCQNMFKAYVQILECYNLFKCSFQQIVCITDVFFCIF  
>HarmGR135  
MESARQKTNTKTKSCSVSIATIKTIDKDMQRMLLPLNLFHNILLCPKYRIKNNFINPNSFLSII  
LGLFGLILSIFSFICYRVYKYRINPKKYVMVMYVTSYIDFVIFSIGTIINFKINVLETVRNVS  
LVLKIQDIHRFLPGQNYFKCFTIWNWISIFSGVGfyTYMLIFTVLTfEMHIDGMLFGFTLLFIDVNI  
IYCIRLIKLINNKVDIWNRRALKMHQMDPIDNEYCEKMFAYMNLKCYDFYKDSFQLMVRNNLFHSSARYF  
>HarmGR136  
MCGKRYEMRNRKRRIICRKIRVHNYKNNQIDQDIKWMLFPLNLMQMITFFPKYSIRSNI  
IKPNSLILKFVSLTATILFISAFIHRHFTLLSRNIHSSSLIYTYAATVAFCLGCIINFIYSVIKTRDQII  
FVLTIQRIHRFLNNRNVYKHFIWNWIIYVIGLFIFYISAVTYFTIMLNLPIYSTYSSVILICH  
DVNLICAIRLMRLLDQKAVLWNDKIWFQENENGHHNNVCRRTFKVYVDILKSFNVYRTV  
FQIPVSKFMLNS  
>HarmGR137  
MEPKGRIKRIFRYIDKDIQKMILPLQMMQTIICLNPKFSLKNNFIKPNNIANNLLAVVGVI  
FFVSLLIYRICDMMLDENLRRYQTVNFLYFATCVDSFFYGC GFIMNFILHFVHTMNNVNIILIFQ  
EIHRRHINDKASSNMAVFRNYVIVSMVFAFQTAASIYVYIVYMHPPWYVVCYVLVLI  
SLDSNIIAYSVCFMKLIADKLVLWNAKLLWSLQHGSHVMRCKKMARAYVQILNCFDVYKNIFELPVSIR  
>HarmGR138  
MAINIEDISTQNNVVEKEVLSLFPFRMMHALFVTAKYKIKDDVISANTLLYTCMSGFTSIVILV  
FYFFSFIFQTAF

VFKWEGNLAKQVCNIFIYAIYLMGSMNFCSDIINKDFNVLLVYKIQSICETLKIKGKSLKNFIMINWIYVITLN  
VYHMMWIVFFSYAFSSSYLYYEVVTNYFYIIFDMNVLYGMRVMKII RQPLQIWLEEVRLNLSVIDEDYEYFWNKMF  
KIYEETLETYQIFAKIFRSVSVKVNWRLLIILAYEICLKLILRNYLSCSLIRTSTIYFRCSL

>HarmGR139

MVTVEVIPVNKNKQIEKDVQSLFKPFNIMFALFFCSKYRIRNDVIHTNSLFYKVVSGICCLAIFIGYICISVFIKI  
FTIHLEGINYSKFCYNITVCALFFSGYTLIYYTHVIESNRNVLLMYKIQNIYKIVKTRGVFVKNFIKYNWIGVAVV  
ALYQLLWLWFFFTIAFASNYEYEVIANVYVIFDLTGLYCVIRIMRIIREPLRLWLDDVKNVQHVDHEGKASFWNKM  
LRIYLETLDAYQVAARTIQPGVSLIFNY

>HarmGR140

MKLKVAMEASIVAKNNIIDEDLQSVLKPLNFMQAVFFLSKYSIRNNLIKPNSLIYDLISVTCLLMFRIVSIYRII  
IFSFASKWTPLLQFLYVSQILDSIFYSVGFLNNYINIVYSKINIGLVKLQFVHKVLNINRHKLRPLIYNWIFA  
ISVYSYFIIFNLYMWLKFPNPSYALILVFSALAFDINIVYALLIKLLTQMLRIWLVEIQELTNVGMGSGDESYW  
NKMFDVYKNILEAYKTVEELFKLLVRFYFCE

>HarmGR141

MRSTSRKIWNRIIILSSEEFSSNNKLDKDVQSIFFPNLMLQLVVLGQKCRICKNNRINPNHCFNKVILFCGMVTYLM  
TYMNRFLIEIMLDENFRTYVKNPFLFLSTYFDHFFYMSGFILNFIISVTKTKDVVNLILTYQKVNRIKDESSFKGT  
VTRSWIYVGAIFAFYLYTLFFSLLASFNVLFNTVVVITLDANLIYTMVVIKLLTEKVKLWNARIITDSENDENNKM  
FDVYVDLLKCYDLLKNVFQQSVSQATPF

>HarmGR142

MKIIIIINNYKKINFVDEDIRSMLPLNLAMLCPKYSIKGNLIAPNTFRNNCVSIVITLVLISAMCYRTYGLSFYQD  
GFSNIVYYSYDVCYYSFGYIMNYIISVYQTEQNISLVLTLQKLHRLFNDAAAFKRFIIFNWIFVITALVTHLLL  
VTSACLDMLYHSKVNLIYGILLVLFDIYIICYFRLMKFMEDKVHLWKSLESSEEFDVCKFCEIMFESYVDILKCYD  
MIKDCFQRFVSMILFFNVSNINIENSCWSA

>HarmGR143

MAVTIEEQNIIDKDLQSLRLPLNLMYILFGCAKYKIHNDKISPNSVIYNTISSITAIFIFCISFYFMIGTFSLNF  
NGYIYINHLGKIYTYILLIVGCLSDLYTNIFQKSNIYSFVMNIQNIYRSLNISGIFRSYIFPNWVSVIALNCFHFT  
WMFYTFYAFQSLDHSFVFASYCIVFDMNIVYAIRIMRLINKSLKYWLEDVEMSGRFVTESYWNKMFETYIEILKT  
YQIIESTFQRTVCLSV

>HarmGR144

MVKIDSKSPSEKSELSSNNVIEKDVQALLKPFNVIFALFISSKYRIQNDVIYQNTLLYKILSGISYTFIAGYFYS  
IFRTAFIYKWEGINFTKQWCNVFIYAIYFLCCVINYHTNIVCSKINVVLVFKIQNISEILKVKGISLNDFIKFNWV  
YFTILNVYHVFWIVFFFTIAFSDTYEYEEFLTNYVYILFDMSVLHGTRFLKVLRLQPLKLWIREMRNSDSVLDEDNEY  
FNNMFRIYEEILDYQILTKTIQPVVSY

>HarmGR145

MVLSRRNSMSLIETNQGDVEILSNNFIDKKLERLFFPLNLMQNLVLNPKYIIKQNRICKPNDVFNFKFIFLSMVIFL  
AVFAYRLCEVIFDENLRRYGSVKFLYFEIYSECFVYCTRSVNCIVNLVQSKNFVAFVLTQEIHRILTYEHMIKF  
YIIRNWVYFSIVFGYIIVLVLPLIFERWAFHFDINVTYIILDANLIYTIALLKHLNDKVQWNIIEVVRSPHRI  
CSERMFQVYVQIFECYEIYKNVVQENV

>HarmGR146

MELITNNYLDRGFQNMMLPFRCLNHLVFISSRSIEYNCIRPHSRSYIISFMGVLCYIIFHSLKFFDANLTAIPNQ  
FIQFFLKVNIIMLLIPYAGFFILNVLHRNKHVQILLKMQAFRIINYKRYKLAILWNWFGVFRHIGGFIIITAYIR  
LLSVAEYFYTLIFFDVHITYAISLITLIRDGVITWIAELERHSQNLEVDKDKHDERMCKLFQAYINLMEAYEIFKK  
LFQVAVRILSF

>HarmGR147

MFPCFKHEGQSDPSSDVEHEDLQSVLKPLNLMQAPFFLSKYTIRNNCIKPNsiiYNLMAVISMLIFRIVNVYKIV  
VFPFVTKVNSSVTFLFLYVSQILDTVFTYVGFVLNNYLNIVYSRINIGLVKLQFVHRVLNINRRNLKSLIYNWIF  
VVSLSYFIFIGIFSWITYPFITLYSYILVVSALSFDMNIVYALRLIKLLTQLLRFWLMEIQELRNLGVCRSDESY  
WMKMFDVFNIVEAYKTIQDLFSLTV

>HarmGR148

MPKKNRIVEVIRKDGIKNPLIKDIKRIFLPFNALNLFLNSKYEIRNNNIYPNGPKYNIIFASFFLILMNALCVYR  
MFTFDVADNSSIIEEDLTAKILGFLGTSFYFVTLIGFTITFISNTLHRENVLLIILMIQTIYRSIDISKSINSYIIR  
NWICLVIVIIISDFTERLMYHVTCHYHVLFEQAFDIITDIMPVLVDINIMLFNRILVLLRIYLEEWIKIVETTND  
EEQWVRFYKIYTNILNAFNLNAKVFEWLVRILPYLMQNSIIFLSEYLYMS

>HarmGR149

MIDNTNSNYIDKNLQTMFLPPLNLMQNMFFPKYSIYNNNIRSNSLLSNFVSLCTTIAVISLHLYRSYKLYSDNIIR  
EFINILYITSYFDIILTICIGFTINFIVSVYQSKNNVLFILKLQKVHTFLNGEQQFKRFMYRNWMFLVFEFLYFTFG  
LCFFCVKLNLPKYDYFCSLTALCFDVNLVYAIRMIKLLSDKVELWNIEAQKLLQLNYVDIESHCQKMFDAYVHILE  
CYDLFQCSYQQLVRIFFSLSYLFNKVFFVLKIIFTIFYRSCSTAFNSFFTSSFISKRLTF

>HarmGR150

MNTVDKDVQSMLPLNLMQYLTFCPKYRIKDNFIIPNSRVSYFISAIASLIFMFILETFYYQILKSPDFDEEPAYL  
IACTTYDTLFGYFGYTINIMDSVIRSKNIQFILTQFVRHRLVNIIEKCFKNFVWNWIIITLFLTLQTLITVFCFL  
LSDFFDATVGIFYVLAIFDLSIVYAMRVLKLENTTVLWIQVLNSHQFGNLYDCKKLFQAYVDILQCYDMFKSCFQ  
HFVSFYQAKCFFHVMF

>HarmGR151p

MVFRLLCGFYFKISSNKIITVLVRAYCLFIGATIVLGTIVYISQLEAILISILNVTNIINVVTDCFFYGENFTAFL  
QKITKLDISGDLEGQIDTPVTMFILLFTLFVRLCNHIRYLIIRVYFSVEFCFGIGSTALCFYHTKNNDVRATVAP  
DEKTP

>HarmGR152

MVLTFTKTVCDKRNNKIKVKPRINMPTEAKLNNEIDKDLQSVLKPLNLIQGLFIMAKYKISDNRIQKDTLLYNLLSI  
ICLIYRVLNIFYKITISSLNRDWEGTRFFIYMSNINDTIFYTFGFLNNCINIFYSDSNILLVLKLQQVHRILKIN  
SKHLNDLISFYWRFIISFFISHLLFEMYFIFQFPVYTMYGVLSSFAILTTDINIYAYFLMKLLNKTLRVWIEEIQ  
KLRNFVTFISINDSYWIEMFNAFEYILKVYNFIRKVKLMVSYCFIIMTETFIIIVLYSFFTFTTIVEIMSFPCHF  
>HarmGR153  
MTPDTSVSLRNDKINHSAIHNFVDKDVQTMLWPLNLIENILLCPKYCIKNNIKFNSLTCLVSVIGFIIICESLR  
LYRIYNLHFDYFTRNFNNIKYIMAYVDFVLSFGFFIVYFVNIFHMKYNVLFVLKFQNIHRFLNEKKYFMRYIIFY  
RISVVIPIFFTGVILYSFLRHSVTVMDCICAISLICFDNTNYVYAIRMMKLLKSKVDLWNIQIGQLQKLDQDEKVI  
CCNKMLEAYKNILDCLDLYKTVFQPLVSLNFFCILIYH  
>HarmGR154  
MKMKIICNTIKKYFSKPVMMKLIDKDLQSMLLPINLMQNILLSPQYRIKDNLIKTNTLTALVSVFCGVMISIFAFL  
LRICLTSEAIKQYSSLYIVSKIELVLYSTGFIINYISVLRSNKNVLFILKVQDIHRFVNDGIYLRKRLIVCNWISV  
ILIFSDFDTIIYAWVKLELRFYNLICGVSVICFDINFIYAIIFLKLLRNQAEWLNRKLNFSGQSNGESVCRSMF  
EAYDNILKCYEMYKDYFQQNVCFNHFQRFVY  
>HarmGR155  
MSVVEDGISNSNDRNVIGKDAQAWLKPNWMDALFICSKFKIKDNVISSNSLFYNIMSITSCVLVLVIYFYCIFKD  
CFHIAWEGLLLAKYVHYCFEYLVYVIGVIAFFFNKRNHSNVVFALKIQRICEIFKIHGKSLKSLIVLNWVLVIV  
LNSYQVFWFFFYAFSRYGFPIEELVPNYFNIQFDVNAVHTSRIMKLMWQTLRTWLEGLQNVYIVEDEDVEHYWR  
KIIAVYKEIEAYDIFRKSQVLRV  
>HarmGR156  
MSNTLRSKVFQNLHLKDVQKMFYFPFYFFLLLLSPKYCIKDNITPNSLKRNLSVFLGAFYVFTSIVYACEEGYK  
DYYNESNVHSLAMMSFIYSLDISSFALGIMLVFVQNIYSRKNILIIIMFERIRQSIDISKSIRSMVWVWVFGTL  
YFSIHAIVFIELHVLQSVNFMQIGGFCINMYAIFDVNSVYGLRIMKILTTYLNLRWTEMLVNLKEGENLISCVK  
LFDIYTNILKAFELFKDVFQVLVRSVDLIGSNYSACLFELERIIYFTGIIYNNQRVYS  
>HarmGR157  
MLKPCIFLRKTRSYPEVLLNNRLDKEVESIFYPFHVILTLLCASKYCI RDHFITPNEYKFYTVNFISLSYVVASF  
AYQMYNNQLVHIHRSDNNIVVSFSLSVFLPISRCICHILYFVLNIMHCQNNVFIIVLINIYKSLNSFQKVRCHIIN  
SWILLALILLIHAWLTIYIVYIYFDVIHVVSEVLLYIFDIDFVYNVRVLLMLTNYLNSWIENIKLFDDGQEYD  
KIHYYKMFQTYLNLRAVDVYKTVSQVLVRWQKSFTQIKCMSNLCFILGLPPSLTKCS  
>HarmGR159  
MCSVLNMYKIRNKLRCAREAVLIDGVSPAAYKEVLFNDIIEEDLQSLKPFNLMTALWIGKKYTIRDNFITFNSN  
VYNYIGITLCVAFLIARVSRYLIVEGIDLDSFAFSLLRTNAMLDLIIFLFGILLTYSTNIIHSHYNILLVLNVQNA  
LRILKINRKDLRRLTVYNWTTIACIWAFFVPHVFYSMGTKRFDIFENLGILFKISFDVNMMYIIFLVNLEKILH  
EWIRNFEKSMFKTSDLEYWKKMLYLYLVNQESYQIVETVFRTHVSLQYHYSKFLHTESV  
>HarmGR160  
MTPYSREVLLNNRLDKDVQRILFPFNFFLTMLFLSSKYCIRDNYITPSKRKYVFGFLGICIIITAANVHQMYGQIAN  
MDLNKRGLLILIFLHVTQIFNFALSIVLNIIDCHKNVLLIVIIQAIHRSFDFSISIRNLVFPYSWMILLIGLCINVY  
TIAYGYAILQSWHILSFIDHVLMMVLDIDLIYKIRLLILLTTYLNEWIKNICLKDDWQQQDQANCVNLFATYQNIL  
KAYDVSNELSEIIVSYEVYL  
>HarmGR161  
MRSFKNIVNIYPKIINNKNVDNDVQEMLYPLDFMQCLIFISKYHIRNNLIAPIGVITTFISMIATMAFVVVHIYQTL  
FATSETNSIASITTENITRYFSCVFCVFTINFIMCVIQTNKSIFVLTYQKVHRFLKNSSGSSSYNNNYIWNVW  
FVITAVIWHSTSTIVYCVVSIYGNFFVATCYMYPIMLFDINMVYAMRIIKLENEINIWNVDIKSRLHTQDENYCRD  
LLNIYVEILECYEIFKDCFQQSVSISTNRDL  
>HarmGR162  
MKLKICRYCSVSTKKTSLTMNSVLDKDVQSMMLPLNLMQYLTFPCPYRTKDNFIISTSRVSNVISVIGTLVLILSL  
ELYYYKIVFDNISEKQYRFMYSLIFDSIYLSFGFILNFMGILGSKNNINFLRLQGVRFLTKGNNDKKRFKY  
FIICSWIIVISFVSVCFPSVPLTFIHTEFYIHIYYLIIIFDINLIYATRIIKLLEHQVATWIQVFSCELNDYLC  
EETLLKKLFRAYVDILQCYDIYKLCFQHFVSIGRKSDYIF  
>HarmGR163  
MFQSLNNVKHKQKIPRNILNFPPEVCLNNYLEKEIQNIFRPFNYAFILLSSKYTMQDNYITPNGKLRTFLSCMSA  
SYVSGVGFPYMYISNKYLEYNSSVYSITVVTIVVQLIIIGYCFGVILIMVNNFVFSQKNILLIVTIQTIGKNINLSK  
VVKNFIVGNWIAILIPSAIYAGIQGSFYIFYIIDYTLVLATLCTIAFLAFELVYALRVIVLLRKYLQGWVQMV  
SKLNYDQDDGYDCVKLFKIYQNILQAFELYKAVSQFLVIGLHLLSSQKSFLKRTLIL  
>HarmGR164  
MHILFKNILDKDVQCMWLPLNLMQYMMMLCPKYQIKNNLITPNSLISNIIISIIATVGFISSSFYRTYEIIYYSVLKS  
SFFMSFVLYYDCIYYVVGFMNCAMGILQTKNMVKFVLIFQKIHRFLNDGSLFTRYVIMNWIYFIAALGFFFIILM  
LFVMLFENWIFIYGYELIFFDLNVVYLIRIIKLEDKVLLYNKYLLNCQNLTHDESYRQKMVQVYVDLLECYSIL  
KKSFFQQFVSNAFIFCFSD  
>HarmGR165  
MNTVKNVQSMMLPLNLMQYLKFCPKYCIKNNFITPNSNVSKLISAIATLALILFLELCYKLVFHDHYDKEKHYY  
LLASYTFDSIYFSFGLITNCLDGIMCSKNNIQFVLIVQRHTFLNKRNFNHFTAYNWLTVISYISLYFTLITIYC  
IHLNLASSTIFYMYFIIYFNLIYAIRIIKLENNQVVLWIIQGLNCTQLENTYDKNCYKNLFQAYVDILQCYDIFKS  
CFQHFSILICKFSTDFNICIIYFFGLQYLLYVTFQILYIYSEVFIYSLINAEAIILLKIGWVYLHQVRSFLES  
DMKVFIYNCICRNVKSLSYFCYRPHGSHYHS  
>HarmGR166  
MHNIQILKAVKNNNNIVDKDIQSMMLPLNLMHYIMCCPRYHIKNNLIIPNGLISHCVSIIIGTIVFIALLCYRTYVL  
SSEYTA MFVVLVYYYSYDIDVYTFGLTMGCTLSIIQTKKNVEFVLIFQKVHRFLNDETSFKNLIVFNWIFFVAAI



VCHFFIVSGFFSLLTYYSKFVWVTAYLLVFLDFYIINVIRAIKLIEDKARLWSLNLNKNIENMDVQNYCKRMFESY  
FNILKCYDIIKVCFQQFVSMIITWLVDNLIVAEL  
>HarmGR167  
MFNSHVAVTSCYPVEVLLNNHLDKEVQAI FYPFNFLLTISMSSSKYCIRDNYITPTQRKFHILRFVCTVALLVIYDS  
VTFKVFAGENIIFYIARFLSVIRNLTFLQNVAVSILCNQDNVLLVVLIIQMIHRSIDLNSKIRSFIAWNWI IATIS  
AFNIMVATAFSSGKDGFNFIGCFTDVIYTSFDVDFVYSIRVLNLLNKYLYEWIKSVRIMNEGKENDKMNCTKLLKT  
YENILRAYDVYKKVTQYLVLSILRKGYIILCFSITKQKTM  
>HarmGR168  
MHNIFKIFQKKRNQTIILNPVHHDTRLDNEVLRIIYPNFNAFFLLSSKYSIQDDRIMPIGMMRKCLSLFNVFYAG  
ALSLFFIYFYIVTNDFSKSSIIMSIIHVSQTVTFMGLTLII VVNIVFENYNIQLIKMIQFINRGIDFSRSVKSFI  
IYNWVFVIFVFSIDLFTYIFFMVTYYMDVLGI VTLWARLMMFISYDINRVYAIRIITLLRKYLDEWNKNVQSQVNNED  
GTRFMKLLLEVYENILESFKLYKTIFQELVSI FNELNVYLL  
>HarmGR169  
MRSNCPPAVLLNNHLDDEEVQRILQPFTLLTVFLSSKYRIRDNHINPNGFIFEFSGFSGLCFAFGATVYRLLKNEN  
SGFDSNVMTNIIHYFLPAMRLLGFVTNFVLTIIHRYNNVILVLHIQRIYRSIDFSKSVDSYVLGNRITVAIILVTN  
GVIFTVFITMYNGFDVLNVLFDIYFVTLDVDFIYAIRILILLVRFLEEWIKSNKLIIEQADIGEYSSKLRESHRYI  
LLAYEMYKTTTQLMVSQEGPQKVDR  
>HarmGR170  
MCSYFKEYFESCQELII IKDISPEADFGNNIVDEDLQSI LRPLNLMQSLFLSAKYCIRDKNITSTTRFYTFRLRIIF  
VLVHRCFQAYQII VWNNTMNFENSTSPNYYSMLYLCIASTVGFFIYFIGDVISIISNIVFRSRNILLVLKIQHVFS  
FLRLNRNEIRGFIVSSWVLVIVSNVMSLSFVVYYVFTFAEVHFITMFTAYASISFEINVLYAFILLKLTENMLREW  
IKKFEATRNIIDDSEKLFQVFGIYWDTLEIYMIIEKTFQHMVWFDSTC  
>HarmGR171  
MKHNIIRYTLCTIDMYPSTLTYLKQFRNFAKVENISAVTSEDRFQNNKVEEDLQSI FKPFFNMMNLFLCAKYSVRG  
KCFTPNTRFYNWFRLICVIVNRCFNLRQFI IWHYTIKKT HFVFSYYYGHLCCINIGSAIIYILYLTGDLII SVSTIT  
QSDYINFLVIKMQEVLKSLKINGSEIKGFLSFSWWSVII SNILSIGYIILYCFTLADMVSI VDVISAYASISYEIH  
VLYALLLKLTKNMLTVWIKFRNSRNLGDSTNEEYINRMFFIYWDVQDIYMTIEKTFHHTVRNSIYCFIWI VAVV  
QYIYIFQILFYIIFTISISLWEIFSSLVFKTAGHQSVSIKVTWLILSGIL  
>HarmGR172  
MTRRTRIQQNNNNIIFQVEMLLNYYVDEDIQSMLLPLNMLHFI RLCPKFIIRDNFITPNSSKFNSVFFIATIVWLFA  
LFYDIHTEFWEELVNFNITDSVSFSVFFSSGLIVNLSLSVFRTRDYVSFVLKFQNVHRFLNNESDFKVFTFINWFI  
VILFVYIYGGFVYIILILITDTLTIQLFCAFVLLSFDADIYIIRFMKLLKDKFNLWNEQALQVRNMRDGNKEEYQ  
KLYQAYIDIMECYRLIKTFSRLVVS KQASLPVSLESFLVNYFIAKTSCYCSISSTSRNYPQ  
>HarmGR173  
MWSCFKQYWLPHRSV IIENTSSFSPPDII EYNRIEEDLQAILRPLNFMENIFLCAKYSIRRQYITSNSRIYNFFR  
VFCIILNRCFHTNQIIDWNITVWNERNTLHFYSTLCVSI SGFIGYMLYLTGDSVSTVSNIVLSRYNILLALKIQC  
ALSSLRINRSQVTGIIICSWCCV IISNIYSISWVIFYCCYGNINIVTIVTAYASISYEISVAYAFILIKLTDKLL  
QQWINECRALSLEDSENVENVDKLFIYVCDIQEIYMIIEKTFQHLVSFEPS  
>HarmGR174  
MFSYLKEYFKLYKMSTVENISRVPSDNICENNRIEEDLQILRPLNFMQGLFFCAKYSIRGKSITCTTRGYHLLRV  
ICVIVAHGYNAYLFIVNSIAFWNNPIASSFFYSSLC LWSSFIAYILYMIGDSLNSIVNISMSHLNIVLVKIQHV  
LSFLRLRRSDVKGSIIICSWACVIIANILSFGWIAYFCATAPEINYIPIITSYASITYEINVIIYAFTLLNLTTKMLN  
VCINEFRTSSCLKASENVKYLHELFTYCNILEIYMIIEKTFQHMVSI  
>HarmGR175  
MWDSVNAQIFIPSSQPVALSKNRLNKEYRIIYPFHILFVLVLCSSKYTVKYNFILKDGVLRKIVSFLSVCFVVIV  
SSCYMFLEKYTAYINNVSIIKIIFFIFHGVLI LYCIANIMLFMSNIALSKQNI ELILKIQLVHTNIDFSKSSKNFI  
IWNWIYLIIFLVIDLAISSYYVTTYEQDVVDALGYLCNYLFAVFDMNVIYACRLITLLRKYL NKWSKVLKLSDG  
VNNRNCQQLFEIYDNIIRAFQLYKT VQVVSLLTIAVAIDSFVHTFKQISCWCHVPLQLLSTTVNIFSRNLGFI  
ESRLQIITDTAESVNEVIFVLLSLKFLLSLFYL  
>HarmGR176  
MTTVRKIVSIKPIYNFTIDKDIQSMLLPLNLTQYMMFCHKYRIKNNLITPNGLRTKCITIIIGTII FIFSIA YRTFS  
LSFNQNSAAFSPLIYYSYDYTIYYGFLILSCVLSIRNTKKHVRFILIFQKVHRFLNDKTVFKQSVVFNWLFVIT  
CLVIHFTTVISVALMLIYIYKYVWNGFVLVVF DLNVVHTVRFIKILLEDKVEVWRTRLLNSPDLEITDLP SYSGMF  
QAFFFFF  
>HarmGR177  
METLPLSNAPKSSSFSSNVIDKDVQAI FYPPLNVMSVLLLHPKYVIKNNKITPLSNVIKIFSACVTTLYLCQHAHKFF  
SVVLDNIRRIQPVSYYATGSDLLFLT WGFIMNCAGNI IYTKKYVAFILKFQESHRLFGSACFKRFIIVNWLSI  
ISMFGYFISSCIYTYTFFHPPWGTFIHMVLANLDADAVYACRLILLISEQFIQWNERALLLKENGEDKDYCRKM  
FETYGQILKCYKIYRNTMQFMVSRI LGLMIISCL  
>HarmGR178  
MSIKMKPTAHPKEFTCTYIDRDVQKMYQPLNLMQQLTLNPKYQIKAGFIKPNNVKSILLSFCGLISYVGVS IYRVW  
ELATDENMQRYP I KFLNFATLIDASFNSTGYIMNFILPIIEVKQNITFILTQEIHRFIHKTDNCKIIVNNWISV  
ITYFSFYIFACIYIYVYMPNWWYVMYVFI LCTRDTPNPIYAGVIKLLTEKVFLWNSELLMSSKAGHREMRCDRMF  
RAYGHILSCYDVYKNIFQIPVSIIFGKL RNYNCVYIKSSF LFLN  
>HarmGR180  
MQVSDIIKPGDFNNKSYNSMIP IIRILKVFAINGNVAPNKTSMLIKSICACSI FGC LSSYCLYKTKYVYNRLDIS  
IRVTDMTQMICDFFQYTVDLFFVYKFGRLYIEYFRQFEI IDVCLETSCYAEMKRRLKTM TFFFLVIWFISSFTDL  
GAWVITYGWMIPVVHLSYLYLLIKILATLDLIANI IQVEVRLRIINNFIKNCYNCASACPVGILADCI RNKNWLH

GEDGSPDQSLKARSIDSHEIKRLSKCYLMLTEQVMFINKMYGFRILLNTTSLLFDMVKILNLAIRIIVGSQRTLYN  
SAGYNFLPGVSGFVRFLTCAAAILITLVNRCEQAYRQRERILNVIDHLLINKNPDLTLSA IQDLQSLQLDRPICFN  
MAGFFTNLNFSLLVSIASVVVTTYTIILLQSVN

>HarmGR181

MAQTVMNFPVVGVSQTHKSIRFVLTFQKVHRFLKNDPHFDNLI IWNWIVV IIAATFYNSAFVYFTNYLGLPMYFIYV  
SVILSAFDNFNIVYAYRLMTCLTHKLEVWNIKVLSSETNCDIFSKNMFQAYLDILECYDLVEACFQHYFFVFQIL  
FYIGEVEFIHYLDLMSIAGMAIFSTVIWLMKNLAWQIMLSQCEKFYSTVQSAQDNCFVLKSNCTESVQRLCKNVR  
RLHRSRFSKLRVCALFRADAALQLSLMALLTDYIVVVLQFAFL

>HarmGR182

MSLMCTVATARSSLNTKKALDIGRLQNINVMFPSPNVVDKDVQSILLPLNLLQLLTFCKYRIKNNVVYPNSLIA  
ISIIIVATSIFVLSFVYRSYYLLSANVLPWFSDFSVYFDVIFYSIGFIMNCFIIVQSKQNVQFVLIFQSLHSFLK  
ETNLKNLVIWNWVFVILVLLVFHII FIFYLLVILKLPFHFLYYSILLNSLDFHIVYASRLMKLLEHKLILWNIQVLS  
CQGNIDESYGRKLFQAYIDMLQCYELVKVFFQQFVKVLVHSLFYIKASLDLFSMTVKLGQMHRIAMAALSISSIVI  
WLVKNLLWQIQTLTVQCERFYSVILHSQDTCAIVLNSNGSEAEKRLCKNVRVRTRARFSKLRVCALFYVDASLQLSL  
MALLTDYIVVLLQFAFLDP

>HarmGR183

MSINLVDKDVQSMMLPLNLMQYIAFCPKYCIKNNFISINLSFSNFISFCGLLI FLSSFLYRNTLIAQSLGHSFTVF  
MYITAYFDVYVYCCGYVMNFIVGIMQTKNSVNFVLTFQNIHRFLNNETYSRNFKVLNWI I VILT VVGQTTIFAYFN  
ITVGLSHFYIYISFIIITVDFNIIYATRLLGILENKLLWSNNVLDLREIGEYDENYCRNMYLAYVDILKCYELH  
KVCQFEYICFYITETFLHSLICIQVSIEMCKMAASRGNISTIGTAILSTMSVLLWILKDLFWQLLFCRQCEKFYSS  
MENVPDYCTLILKTSCSESVRRCLKNVRRVHRARFSKLRVCSLFDAGAALQLSLMVLLADYTIIVLLQFAFL

>HarmGR184

MEIFVNSRQINSNNIVSDVQSMMLPLNLLQNVFFCPKYRIKNNYITPTNLSNLISSIATLVFIIMYAYRNYLIG  
LFKTSQFSTAWKYSSYFNGFCYSLGFIMNLVIGIIQSQNSVQFVLTFQNVHRFLKNENGFRSFI IWNWVAVCLTLV  
YVFFFIYQYTRGTIGKIHACVGFLSSFDNFVYATRLLRLLEYQLVLWNNRFFKLRSDIRDKDIIQKLFNAY  
ANILECYDIIKISFQHYVSFTLQLIIDLLKYAANNDCQKTVIIAIRVSI AVLWL IKNLMWQMTFSHQ CERLYLAN  
ERTLDHCAFILTSYCSGMEKRLCKNVL RMSRVRF SKLRVCGLFYAGAALQLSLIALLADYTIIVLLQLAFL

>HarmGR186

MWKKSIHAFKILPNNRLEKEVQRIVTPFNVILTAVCSPKFRIRNGYITPSSKKIHILLFFGITACNVWSCYGITKS  
QNEYTTTSIVSYFFSLTIFFFYIDFILFTSCNVLHSSRRQVSLILKIQELRYNIDITKKVKNYIIW TWIWF L ATFSV  
FLVNFLGFLMNLDRIFFIHLSTYFANLQFDLNF IYSVRIMTLLVIYLKEWTKSVVDLNEEEQNKEYFVKFKFTYQN  
ILRAFKIFTLCFKDIVSTSSYI

>HarmGR187

MADSSRRLFELVFRNKLD EDTLMI IKPFNIFLRIF FSSKF KIRNGYITPRDKTYIILPFIFVSLFKVWTVVYVYIY  
NSSILNNTFRHIYFWHIFISYCIYSSLLVYCNIVNSQNNVVLILRIQEIFRSIHLKNGIRS YVIWNWITFVVLASL  
ECFCTTIYARTMNNLSSLSN SFDILLSICYDFNVACSIRLIKSLTLNLVEWSNTDK

>HarmGR188

MWYSHRPSQLLLFTNKLKDVQRILKPFNIILTIF FSSKF KIRNGYITPCDKKLHIILFICVIFLNAWSVYEMRVY  
ISGKASIIINSQII F SFLLIICFFTYFILIFSNIAYCQSNILLIYTIQDIHRAMRNSSSFKNYITWNWITILICIC  
FDILIMSSYCMLLSKIHIFSVSTLYLNMASEINVFYCI RVLAF LIMSLEEWIENVLVVKSDDYCEEYCGKLFKVYQ  
DIIKAHKLQNCFRLLVRS LIFILIKIF

>HarmGR189

MFQSKRSVILLTTNKLEDEDILRIVRPFNVVLTAIASSKF KIKNRHITPCVKTFHLLICFSIIALKLWSSFMFVVG  
GDFKHKKIVDNFFCLTVFFYCVNYTLLTYNNIMHSCHNISLFMKIQDINRNINISVQSYVWVWISFLITLILFIS  
DISWFLKSGIVGTVHVSENI L VFQFDIN FVYGIRLV TLLVMYLKEWARSIIIMTEERPNEYFVRKLETYVNILEA  
FKLFTICFKAMVSWFYKLDEMLS

>HarmGR190

MKVTVVHPFVLSPSNKLDK DILRIVKPFNIILTAVCSSKYKIRHG YITPCGLNYYILTYAGIGVFLVWSTYNMISI  
NIDELNQRADLAAYLYCTMFLFYISYGQFI IYNI IHRQDHISLILKIQEIYRSVDISKVQNVVLWNWLSFFLMFC  
CMIPNISLLYLSQNFVSYTHITNHSNIMFDFNF IYGI RIIALLVVLK K WSESILDKEFNLEKKLKAYQNI LEAF  
QLFAICFRAIVSSS

>HarmGR191

MEGKTREKKFSCNYVDKDVRTIFRPLKIMQTC SFNPKYQFKNNFIYPANTISDVIA YFGVITFLT IMIWRITDILF  
DENLRRYQTLNFLYFAS YADSLFYSFGYIMNLILHFLHSKDSVKMILIFQEIHRFIRKSASLKNIVCRNWWALALM  
GGFQSI VVIYLYIVYMHPWYII F YV FYLLSPDYNTVY AICFMKLLLDKAVLWNVNLLLSLQGGQRKLCRQMTRTY  
GQILDCFDVYKNVFELPVSTYKIFIC

>HarmGR192

MNMNQEFAPVFTVDKDVQTM LPLNLMQNVFFNKYRIKNN TILPNNLTSNILSFVASLTCTLI FL YRVYLMSALE  
DSRFTSILYSSFFDCLY YCVGYVIN FVSGVIFTKKSIEFVFI FQKIHRFISNETDFRLFVIWNWVSVSVAASGYV  
LICIFFVTNADLSVFNGFPCLFLC I FDFNIVYAMRLIQLLRSKLVLWNLSLETTSI

>HarmGR194p

MSIIKTDIFTKMIIGLQLICGFYCKISTNKVVNALVRAYCVSIAATNIVLILCELFIT IYRS GIGIVVFVATLYFL  
HLIIDLCSNCENFLKFVNNIRQPI SQDLQSDVSTPITAIVL

>HarmGR195

MEIKSSSFFKSFQKCMGPLYFYKVLILLQVLLGRYFSLSKSKLTRFFTKLYCVFMYIHM IYKWN DVVLVSHKFVLP  
PFIMSEYTG YFVISIILSEDYFFNFCDNLLTND RVMGFKNIPHVPPNVIGFMLITVISR VAVL TRHFTVSLPSVH  
LIYVTVLLISLDLSHIYTCVIFCMIQLRMKVLRCFLENIHIPINIVSGNEVEMSIKNVRKSLYYYYNNLLDSMAAID  
KHTQCMVSKLYLHQ

>HarmGR196

MFSYLKEYFKLYKYMSTVENISRVPSDNICENNRIEEDLQLILRPLNFMQGLFFCAKYSIRGKSITCTTRGYHLLRV  
ICVIVAHGYNAYLFI VNSIAFWNNPIASSFFYSSLCWVSSFIAIYILYMIGDSLNSIVNISMSHLNIVLVKIQHV  
LSFLRLRRSDVKGSII CSWACVIIANILSFGWIAFYCATAPEINYIPIITSYASITYEINVYAFITLLNLTTKMLN  
VCINEFRTSSCLKASENVKYLHELHFTYCNILEIYMIIEKTFQHMVSI

>HarmGR197

MDNSVYKLLSLRLLFGHYFKLSSSKWICYIAKIFCFMSMLIVNFAINCILLDDFTSFDISQISLWMLLWIMLVESSE  
SILISLYTDETYLLKFSAKIKNYVSSPTPCRATYVMASFIIPLNFSVLIAYLYEFGVAVNIFYNISYTTTCYCSYL  
TSLYITEMYAKAINNLTSAIVNRLKDNISDEEKRVCIENFLDNYLKLLKIYNATMTVSRINVSVCKSFE

>BmorGR1

MNRHDHRSIYNPKRNEAMWKRELFVNNEGKDIKDFQIKDIYGPEITDKDGALLDKHDSFYLNTKSLLVLFQIMGV  
MPIMRVPKSAQTTRRTTYNWISKATLWAYLVWGLECIIVVKVGQERLANFQIGSNKRFDEVIYNIIFLSILIPHFL  
LPIASWRHGPQVAIFKNMWTHYQLKYLKITGKPIVFPNLYILTWGLCIFSWVLSFAVVLSSHQYHQDDFELWHSFAY  
YHIIAMLDGFCSLWYINCNAFGTASRGLAINLHKALEAEHPALKLAQYRHLWVDLSHMMQQLGRAYSNMYGIYCMV  
IFFTTTTISLYGALSEILHGLSYKEMGLFVIVAYCMTLLFIICNEAYHASRKVGHEFQDRLLNVNLGAIDRSTQRE  
VEMFLVAIAKNPPIMNLDGFTNINRELFTANISFMSTYLIVLMQFKLTLLRQGARKTVTAIVRAIFNTTTITDNG  
AGGSEDEQE

>BmorGR2

MIPDHLFEEGINNTFLDYDMRHVQRNRNIQEKTKQDYEQEQRDLSSQDGTCEIHDQFYRDHKLVLVFRALAVM  
PITRSRPGTITFSWKSTATIYAVCFYIAATAVVLIVGYERIQILQSIKRFDDYIYAILFIVFLVPHFWIPFVGWGV  
AHQVAIYKTNWGKFQVRYRVTGENLKFPNLKTLIVII SVGCLLLAVCFLLSLCALLDGFLKHTSAYYHIITMIN  
MNCALWYNCKAIKIASQSLSSECFQ RVAAGVQDTLLSIDVLAVDRPTQKEIDHFIQAIEMNPAFVSLKGYAHVNRE  
LLTSVRFTTII EADLLMIY

>BmorGR3

MSFEIKNNFFRTSVPIPNGFPVQTEAKSKNKPIFLDVSPAPTPKVNSPNAIIPMKNNLIDPFINKDIIYENIKPVF  
MVLRLIMGVPLTRTTSQVTKQLSNRILPVKLYKKSLLIAIIPILSTTSVIVTHVTMVHFKTSQIIPYVFLIILT  
YMLGGYWYLLCEILSLCANVLADDFQQALRHVGPAGKVAKYRALWRLSKLARNTGVANCYTFTFVNLYLFLIITL  
SIYGLLSKISSEFGTKDIGLALTALCSVFLFFICDEAHYASHNVRTNFQKLLMVELSWMNTDAQTEVNMFLRAT  
EMNPSQISLGGFFDVNRTLFKSLLATMVTYLVVLLQFQISIPDATQPEIPTNIDHDVQNI TDTTTEASSPISTLMS  
AFAKRKND

>BmorGR4

MSRIFSMTRYFGVSTCKPSIAFGWTVILLMLLAEVGAIWKIVRLLGGWAVHSTDSRGFTARLSGCIFYGNALLS  
LILSIKFVSSWEQLSERWSRTETDPLRLPSDSRIKRRTVLVSAFVMTCACVEHMLSMMSATGFDCPPEEYTERYI  
LSSHGFLVQNDENYWLAIPIFIMSKLATALWNFQDLIIILISMGFTSRYNRLNTYVHRVVMLERNLKEGAQVSSE  
NYMRFQIWRRIQAYVYRQAALVRLVDDQLGALVLLSNVNLYFICLQLFLGINSKDRGSFNRLYYFISLGWLMFR  
ACGVVLAADVYIHSKKALISLYLCPELAYNLEIKRLKYQLKNDEVALTGMGLFSLNRELLLEVAGTIVTYELVLL  
QFSNED

>BmorGR5

MYACYKIIVALSLNRQYNHTVTRVGNRKHISTTRGNFRERILRKVQNRISPEPIQEDSKIPLTCQFQLFQTAMKH  
LLISGQFMGLNPVSRISDHSPTKIRFTVLVSWKFVYGVGTIGIAQACATVLCFKLLKDSVNIVALDFVKIVSAYFAF  
YLSTGCNTFIFLRVASKWPTLIKHVYETQLDSYIDVKVKNKCFAAYIIFFSMSMTEHMLSLLSKFVITMDCLPKGS  
DLFESYIIRNFPWLFEFDVPYYPPIGVILQFLTIVSTINWSYSDLFIVCMSIYLTSLKQINKKIEMAGNSNHLPI  
PFWRTLREDYTRATRLVRSFDDTIISSVIFLSFASNLFICLQLYNILSNGVTSKYNLLKEMCPNYPSPGPLGGYEQI  
MYLLFSLSLVLLGRSLVSLVAAKVHSAVMVPASALYNI PRNMYCSEIQRFQDQVHGDKVALSGLRFFVYVTRSLVLS  
VAGTIVTYELVLLQFSNED

>BmorGR6

MLLRNYQNLSFWTSAKKSKIHKIQSQETVTFQGSCLKLVLFQGLFSLFVPCGLLSNDANKVKFVPIISWKCGYSML  
SMIGQLFIIVMCILYVAHFETTLNGTTPIIIFYGVTFISMIAFIRASRRWPELIQHISKSEELDPSFDFRLKKKCNI  
TLLLVLVLAILEHIFSI RSAYSASQICYPHGTGYEGFVRYLYPVWVDFLPPYSAALGMVTFQFLNIQSHFIWNFTDLF  
VICMSYYLTSRLDLVNKKLLPAQGGKYLPEIFWRTTRETICRATKLVRKVDIINGILFISFANNLFFVCVQLFNFTF  
DDSDVMVGLCYNYSEERRTKPVGREPVIYLLFSLGFLISRSITVSLIASQVNLA STVPAPILYDVPSAVYCEVQRF  
LEQVNGDNVALTGLQFFSVTRGLLSVAGTIVTYELVMVQFNQAPASDSFTEKLVENNISTIETFYNYS

>BmorGR7

MVLEAHTQIQYCTAKANYCEFHAGLRHLMRLARWAGFFPVQGLSQTNPDDVRFEFRSLYALYHAITVIGQTVMTFL  
AFYSFVDSNVLSVSVSNFLFYFTNYVTLVLLWRLSKNWSALISKTFEFSQSVTEIRTTNRNLVSRTNTLTYYVVLIFA  
MIEHALSKVFNIRSVMCCLGETSLNHTVINNYFKFKWKFVFDYFSTSTTYSYFVGFI AEFLCMQATFLWSFTDVLII  
MCFSIYLSFFEDFNSTVSSFMKKASKTPWSTLRVQYSQIVLIVKQMDQLDYFVLISYFTNLFFICFQLYNSLN  
RIYDANDVCNENMDIIATASVTYLTYYVFSFLFLVTRALLLSIMAANVHSCAQVPQALAYEVPADYSLDQRFQQL  
QLRYTTVGLSGVCFNVTRGMILRVIGTIVTYELVLIQLTKKNLNDNTSIRDYLPKHLI

>BmorGR8

MAPRSVRSMVGTSSKDMKGGFYETVRIPLYIYRLIGILPISGLWHRSSKYNRFSLSKSFYTIIYAPTIVMQTFLLL  
VHIYDLFAFFFGHQRLGRLIYHMNFYTITILIFMGSRKWKNVIKEIETIELTLPRLRNSKKALATKSFFVFAFFVF  
SLAEVVLILQFTLRLLTKQRHVLPGDSGLYLRSYFVYIFPYLDHFPFSYVMGFIVQIIKVQGIITLNMVNCVSVIL  
SIYLTNRLLKHYNRIVFAKGSKTNNTRLKWVELNLLYTRISNLVKIIDKNLNPFFVIFSTANLSYICAQLFYILNKL  
TSSRTVKITSFLEDKRSWETVLYISISFALVVLKVLLVSITAAEVHTTSREPLRLLYTLPTAEYTIETQRLMTQV  
YYSNLSLSGLNFFHITRGMLLGMVATLLTYEIVLLQI

>BmorGR9

MPPSPDLRADEPKTPCLVGGAHAFILKISSFCGLAPLRFEPERSQEYAVTISKGKCFYSYILVTFVLICTIYGLVAE

IGVGVEKSVRMSSRMSQVVSACDILVVAVTAGVGVGAPARMRTMSYMENIVAVDRELGRHHSAAATERKLCALLL  
LILLSFTIILLVDDFCFYAMQAGKTGRQWEIVTNYAGFYFLWYIVMVLELQFAFTALSLRRLKLFNEALNVTASQV  
CKPVKKPKNSQLSVYATSVRPVSCKRENVIVETIRVRDKDDAFVMMKTADGVPCLQVPPCEAVGRLSMRCTLCEV  
TRHIADGYGLPLVIIIMSTLLHLIVTPYFLIMEIIVSTHRLHFLVLQFLWCTTHLIRMLVVVEPCHYITREGKRTE  
DILCRMLTAPHGGLSSRLEVL SRLMLQNISSYPLGMCTLDRPLMVTVLGAVTTYLVILIQFQRYDS

>BmorGR10

MTMSIKPRLQCMVPPSLALALRVSRLAGIAPLKFKVAKQSNIMIRLSTSLCVYSYLLVTALNVCTLIAMIDFVSPV  
KLSIRMQTETKRFVWIADVIMGILSGVGVYTAPIQMRRLIAYLHRIHKINSDLGTYSSSLTDKMLHRLTIGMLLI  
TSVIIVTDFTFVMYLADLNHRQLLIAIMYWCYCYCFIAHLLMQFVLIAALALSSLKLVNNGRLTLLHQSGIESL  
TEIPNSNEQHTANAILPQPPKKSNNNSIDTLAFVVTKRSVRFPTAGWMDQRTIRRLALSYSICEVVRQIDNNNGI  
IVLALLASFLHLVVTPTYLIISFVTESPHGTGEKVLNPILQTVWCPLYHTFGLVMIIEPCHRTHEEMETTRELVS  
VMCSADPRDPISIELEMFRRQLVLNKASYAPLKVCTLTRSLVATILGSIITTYLIVIVQLEIKNMQ

>BmorGR11

MKPFRFFLFVENVICVYRNYSFHKRYARAIILSRVMFEVSLIILTLHSCRNFAGVKYKTEIFTYLATASSTILIL  
LALYKTNRFTELFLNFKAFYRNRNLVDHLEKWNKQKMATVIIVLFCVIKFSTLIYTDLIGEYSTPCRGYFTEYL  
FYTNLFMCNARYLFEFSTACVVLHLVSEQLDYIAISMDCTMFLYIDISKKNIMSSAKKRKLKYFDIFKQFEKWTDA  
YMNVKRSANLCDTVFRAQLAIMITTTITLYIILLYGITSFNIERGKFSVVKSLSYLISLFGFLIALLLLSKAGQRI  
QKSAENLRKLSKFLHLSEDEPFHRAATNLLRLVCTHHIKMRCFGFIDIDMTLLPSCLMFVTSYT  
VIALQFNNVV

>BmorGR12

MKNLKL CRTTFYFKIIMCSRFIISGLYFKATSKKWIISYLYKVICVLYIICITRLFYAKEDTFKPLVFXQFIGNSIE  
SLRTGEGHVLKCYSTIFSLKLIRNYLPDSNNHIPISSITNFLVIWKVFDQVYIVLMHYFYTTDIIHRLILSILT  
TIGVNLSLMPIIVIFELMWRAVKALRKSLGEHLKGPVLEIGRERLKAQQILRCLNVYKDLNATLKFNSTPMKTMIL  
ISTLATFIRLTFLFYQAILGHNEGLHLPRKILAIYYALPVCLLGVLMELVARECDKLKTLMTKELLVKDDSYCT  
VIVDAVSYIELNPLKFSILRAFNVNSTLILGLTNLCCTTYLIAVIQFTYSCEDINGLSHSHSH

>BmorGR13

MEDSFNRLLSIRNMIIFQNVCGFYHMCTEKLYISRIIKMYCVALAIVLSVFCFQNPDI TYLSWDVVVWTFGYTLNV  
IICLRYNQNYFFQYWNGLHEIDIKMNLTSIDKEKVPISR AVFTVFLILRSTAFAMTIFVFGYLETGILSNTIISIY  
SINLTEFYRNM SNIPMILMFETFYVRILKEQLCSELSTVLGCNNDARQLKLILKYLRNYSRSLVRHLMDDTLFPK  
ILILVILVGSFLRSL LIGYAFVYNSDQIILLSLPVMFSTKILSEVVEIKLICTEKLLKNKNEGLVLLDLDLSSKPTF  
LTSKACGEQLQDALSFLLNRSYSYTLQVIEFDCSLAFVFTSFCITHLIVVVQFTHVLD

>BmorGR14

MNLHKNIPIRNNLFANKVTAIALPKTLSVLFKLIHIFFLDLGVY EYKTFKIKCIVKFLTISGSLTISVVCFSFM  
VSNLSEHTFVGWYGGFISTYIFVVLFFNLSNRMTFVEFYKTLRLFDANYGIDSNEYKFNFKIIFVNILFIANRMVL  
SFVYCSYYPQNCIRPRYAQILFMLPWLTDVLLTTNMFLFYATYCRIAKFPMLIKNSMNTVALRNSYKLIIVDSLEK  
TQTSFDIVFIIALVFSVPEIMMSIYSTLLEVISKHFLEVASILSLNYVAIAQSLLLTLAPSLCAGVLPWKTNNIKI  
ILHEKLFTEKDKASAREIELFIKYIESRPLKLRACNLVPLDFSLTIIVLNICVTYLVIVIIQFTHLY

>BmorGR15

MISSSDINHKNKVFAYNVPGIALSKTTLTVLFKLLHYVLLLDVGIY EYKTFKKNKIVKFLTITATGVSVSIVYFCLI  
ATVLRKNAFFYWFYVLFISQYMIIVFI FTLSNGMSFTDYKMLLRFD AKYQINSNNYYFNKIILVIIISILNRIG  
MAI IYCSYTKNCYEMSFSQIIFVLPWLTRDVILIMNVLFYVTYCRITKFPALLEN TKNVGSLRNSYKLIIVDSLE  
KTQKPFDFVFTISL VFNIP EIMLSIYFTLLQVIHSHFLEVAPTLSISYFSITHSVVLILAPSLCAGVLPWKTNNTIK  
IVLHDKLFLFKDKNSARNIKLFIKYIEARPLKLRACNLVPLDFSLPVIVLNLCVTYLVIVIQFSHLS

>BmorGR16

MIMNLTDRISKRNKVFAYNVPEVTLPTTLKVLFKLIQFTLSLDFGVYKYKTFKMKCVAKVLTLAGCLAASAACVS  
LIISNIFENQLFFGWYTLFVCQYTIIVFMFTFSNGMTFIDYKMMLLRFD AKYQIDSNVYHFNIKIVLVVISVTSR  
LFLCAVYCIYSTENCIKPWYNQLLFFPWLSLDIVLIMNMF LFYATYCR LAKFP SLFENPKNVVPLRNSYKLIIVDSL  
EKT KSFDAVLIAALIFNIP EIMMSIYYTLFQVMNKHFEVAPVLSLSYFTIILSVLLILAPSLCAGVLPWKTRHM  
RLILLEKLFAEKDKNSAREIELFIKYIEARPLQLRACNLVPLDFNL PVIVLNLCITYLVIVIIQFT

HLF

>BmorGR17

MGFSLGTTALSMFFFEKPVVFTIIQITMIIVKPAKYKLSDFPRPKDTSKLSESIIMYFKLFHIFLGIDLGGFRYQN  
RQVKYAVRLISLIQPLAIYGLCIYALLKIIANTEFLWYTI SFTEYVAMSVAITLFSNEMTYCNFMINLKFIDTKLK  
IGDESFRIGVKLISSTILIGVTRCFTTTTYCLLGFCAPKPTAAQILFQIPWLTIDLMLLQYMFIFYACYCRLVKILR  
ILKKRNTDIEEMRIYKTLVDVLDRARAPFDLAYLLGLLFSIPDVLYSIYESIIKVGEINTAKALSMSIIYITNIQ  
SLALMFAPALTAGFLPSLTMKMRIILHDKLLEEQDKKTYRHIVLFIKYIETCPLKLKACQIIPLDFSFP IIILNIV  
VTYLIVAIQLTHFL

>BmorGR18

MRRSTKVISMVNQSDKGEIKTCSRFMKIYFFVIYIILTG FNFGFYTG RGLNFLRVIQASVLLLRFIASNCIYIAFH  
FRLL EAIWYSLTFSES LAIVVCFMLSRSALSCKNLF EYLYSVDQELKKS VGPSIEVKLALYTVVVS VLR LTVVFC  
AIAYYETLHEGFCVELVYNTPCYCSLDLYLVHFTIIFHSVYCRLKALRISMNEKFDVYKGTLIYKSLIDNLEEIKKS  
LDVPPFVILLNAVAIAMINILVTLEISYGQTMKFIRTAPRYLETVLLFSSAFAPVLAADMMASEAQKIKVTLNNIL  
QRDDSLLEDDRKVKQFAGYVSARPFRLRACRVLSLDC TLPVTVLSICVTYLVIVVVQFTHLY

>BmorGR19

MRRSTKVISLVNQSDKGEIKTCSRFMKIYFFVIYIILTG FNFGFYTG CGLNFLRVIQASVLLLR LRSVASYSMYIARY  
SPLLEVIWCCLTASENLAVVCFMLSRSALSCKNLF EYLYSVDQELKKS VGPSIEVKLALYTVVVS VLR LIIYVFC  
ATAYYRKLFDGLRLELLYHTPCYSLDLYLVVHFTIIFHSVYCRLKALRISLNEKFDVYKGTLIYKSLIDNLEEIKKS  
LDVPLFVILLNAVAIAMINILVTLHISYGTGCRIDYKSV AEMACSQLVIRTSRSETANGSSEAKRKKLVVGPLMK

LITAAPRYLETVLLFSAAAFAPVLAADMMASEAQKIKVTLNNILQRDDSLLEDDRRKVKQFAGYVVSARPFRLRACRV  
LSLDCITLPVTVLSICVTVLIVVVQFMHLY

>BmorGR20

MRRSTKVISLVKQSDKGEIKTCSRFMKIYFFVIYILTGFNFGFYTGCGLNFLRVIQASVLLLRSIASYSIYVAIH  
FRVLEAIWYCLTFSESLMVVVCFMLSRSAISCKSLFEYLYSVDQELKKSVGPSIEVKLVLYTVVVSVLRLTVYVFC  
AIAYYESLHEGFSVELIYNTPCYCSDLYLVVHFTIFHSVYCRLKALRISMNEKFDVYKGTLIYKSLIDNLEEIKKS  
LDVPMKFIRTASRYLETVLLFSSAFAPVLAADMMASEAQKIKVTLNNILQTDDSLRKSYGATVFSFALLVTMIVEA  
TMVGVEDNNIIGPYIDVEREARLTGLYVMAIILTLMFLAKFIFDLVFBVYGVVMERAGIVKAYFIMWAVFFFLSVSV  
FFLNCLDFNTSTIVLEVFIYGLNIYAILLSHSFYKQLNTREDV

>BmorGR21

MAQRTNSINLFRSRPPDIRAGVGEPRIFSKFICGTMFTQKSLVNFDLGGTTPRGGDQEHSKFFKIYFLAVHSVTVLD  
FGFDRNAKLTILISMFISIVRMGLAAVSFMSLWGRPNALALGWAPGTLLCENILVAVTYSASRSTFKCGDLFAD  
LSTIDELFGSACDYRIESKMLLFTATMTVLRVVIYSTSRLVRADGDFDVLVLEVLNNLETMCMYLFITVYFFVLFS  
IYCRFKKLRELMKNDFEIRANLIYIALKDCTDKIKQSLDVPFLVVLVFTVLVVMVDVFITLEMIISNKYNMAVYV  
VRYLEITLDFLMLFAPVLLADMMAVQVDGLKITLHDLCLNNGVGHDDLSDAMWMSFVDMKRYSSLAEFIYGVEAR  
GCRLRACRVVPLDLTLPVTVFNVCVTYLIVMIQFADLY

>BmorGR22

MDFGFSLGVIYKRMKVLNENISLVLRVMVAIMCAAMVMKQDILDSAWADITLTESLLVIVSFKLSKPKLSYRELLENL  
SIVDETQGAPPAGYKVERKLITYIAGVTALRLTVLCLYCVAHTEQYSIDNFIEFLYNVPCYCLDLYLIVHFIIFHS  
IYCRRLTRLKALSNNFDVYRAHLIYKTLIDCTEEIKKCLDIPVSRSDRHRHSLHKPMGTFLKSyrTPRVMFQLVVI  
LIATILVVMVNVLVTLRMLFKGEVTQRGSVHVQVLPENPLSYFNIVHCISLQSIISAFLLRYIEVILSLALLKL  
LDELKPDFAFKSHWKIWRVLIVGNDGQFARNQTSTDNIYQAAQNWMTRWIRADRTSDIREVAGSQDHLTETDLEE  
MLTTRSCVTAYWIFDAGSEHVWYVAAAEERREVRQFAHYVGTRPFRLRACHVLALDSSLPITVVSVCVTYLIVIVQ  
FTHLY

>BmorGR23

MAQFQIPSMAGSGLNVAPFSRGRRHEGPKHSNFTKKYFLLVHLVTCLDFGFHRDNDTKYKWFHAANIGVRLVLSA  
YVCSVSLSQDLSFASAAWTILNNSKHLVVAIFTIFKPKSSCAEILKDLLMIDEALKIHRGCDVKGQITVCIVLVT  
AARLLIAAASSLSLHEAFSASVGAAEVLYSFQSYCLDFYILANFFIFYSVYCRLKNLRRVLQNNFNIIYRGNMIYKV  
LVEHMDDIKKFLDIPFVTSLLVTVMAMINVLKTLQLIHDGENDVLTIVLRYLEMFLSFSLIFAPVILSDLMSIEA  
DNINVLHNYIYETDAADIAVAVHPSARSPVVSATEERTAAAAASVSLAIFSSRLTSFNLWCWRARGAGAEFTVAV  
CVVRLGAAPVTPRVSGALAGLHAPRDRAQHLRHLPHRGRAVHASLLISLSLL

>BmorGR24

MCINKKIQSIKSLVSIRTIMLVQSIILGFYHKMSNNFFVSFLFTYTTILISVLSFYSVNDVMAHKFAYTSLMILE  
YDINTILSLITAGRQYFNFFFEEMKKIDFSIGFELNIEDLPLSRTLFTVITFVTNILLSIMTAALILFFSTPPLIIS  
SGSTYMAIIVFFGLSLNVLPRIIIFELIYKRIKYINLSLKRK  
LKALALECDHTIARFEIINENLIYKNLLQSLGNVNVSLKSSILLTFTCFFRCSLICYYVITMNEDKVYIMQIIIE  
LTKQTLFLGLVLIILAELYIKNEIENLKMTVSLQLFTCTDTQLYHQVSDXFEIHRITPIQLCGFKNMSVDTNLFLGLI  
NVCSTYLIITQFLNAYVN

>BmorGR25

MFVKCKLYVKKFKPMFSVMFIMNFRLICGLYYRIHSDAFVCFVFKVYICLSMFLFFTSSDLAAPFSRSIPILATL  
FEYVANVLDCILTGQSYFFHLRMELMRIDPRLRGLDRPPASSIVFTAILSYKIFILAVYIHGKARTTYLQYEWFS  
IGIHLLVLFSNLVHMNRMLIFEMVTFSLAQKKTGLGELLKSSLRERVERKCEILNRLFKTYKRIIELFNNTMAAT  
KLMTLISVVSCEFIRILTYLYQVLTTLQSSSSAGSIFTTRHLTFIVTFVREHVLVSFYFLKKVGIQORLQINFKIKCN  
VKTETLELISQDDEYTEKLEDALDFINSCSSKITILRAMTVDATLPLTFISLCTTYIIIVVIQFSHIYD

>BmorGR26

MNKTKIYRKLDKNERLVCSVQAMFARLIVGLYDIKVSNRVKWMIKSYCISLSSFCYLIIFRDDNFSLHPKLT  
SVMEYITYVTFSFLTCDKYLFRYLRFNPRTDGYPIFLYLCKKFEKFKIIICLFVSFKILGVVLMQSWPILSTPK  
YIWGTLALHFLWLASHMGRVLFILVYGILFCRMRTIRIIFENRGFQNTPOQNLTPKRYILMYEAVLNSIESVDPPV  
KFLIFTFICCFAPKLVSLSFEIMEEMKKGELSITTFIWFVLVSPSYLFLLLSAIALDLVSEDVQELLSITIDRRL  
NCKNEKERSEIQEFFQYLRNPNFNYTLWQVVSNLRLTLVATSFSIANVIAIMQIKNSKI

>BmorGR27

MVFKYKIMTKAPKSLPVLKILMLFRLVFGNYFRLSSNRYINFLVKSYSCTFTILLSVMCGKRLKNDSPYMLSLEY  
ILNKILNYATSEGYIFKYCNSIKTCDKIMGFKKLPIITIDVFIAIIITVITRTAITIYFGFLFPFDKYQVVLVYVGC  
IVFSNDLNSLTIMNVFGLLNRMNLLRKSLEAMTVPINIIGKNEVAPKVLVRNAFRYYSNLLDNLDSVNHCVQYS  
LSVTLLLFKPKAVLLCYDSIKTYFVKIDNNFAMDIVDPTEIILSIVVMSFPAMLCEMITNEVEKIKAILTKHLIQ  
SDNSLRFELNITLLYICHRPFKYILWRAIPLDTSVPIGIVSLIITYVIVLIQLLHFST

>BmorGR28

MAHKIATVGPTNATATVKNKRKLKISKRVTFIKVVRCLRFILGHYTELTSSKLKAFLIKCCSLLAVIIYAPLN  
YIKMAYVMGLIEYLLFVLLSLFTGDEYFYKFHNSIKSIDVLMGYKRGKIIDSNAIIFLLSVITIMRIVIIYCRSTV  
LAFRFTIIGVYLAIFSLRISYMLITVIFFAMYHRMKFLRKKFEIITIPVTIIGKQKVASKIRLIRKYLINYHLLD  
CLRDINGGLQYFLAIMIACNLPKYIFFAYSARKIQVLEHITIHSVQNVEMFEGFLFVVVPAIFAELTTAEVERII  
DVINRQLLRCTDEHMELELKVALEFIRRRPFYDIWRTVPLNASLPAAIISLCITYVVIQTLTQFHDNF

>BmorGR29

MYLRSKKSFRKFLSFERMIKILLMICGHVYQTDSSNVVSSIHRLFSIAITICLCPNFENPFYFHVIESVLYSILS  
QFTQYGFFFRFCSTIKTFDLLSGFKQIPLYTKRVCFFLLITLFMRLFTVLHFLAYQSKFVTFCAFIIMLSANTGH  
ILMTIMFSTLHTRMKSIQKLFANNPIPVNIVGKNENASHIKVRKGLICYNNLLDTLKDAEKEIQFTLTVTCLCHV  
PKIICYVYFVITVIYKSKFSGYNLVPLFDMILACMAVTAFAVFAELTKNTVDKIKKILGSQLLRCSDESRLYELEI  
TLEYVIQRPFSFSIWRVSLDASLPVAMTSLCITYVIVILQTLQLRP

>BmorGR30.1  
MYLRSKKSRLFSLFSFERMIKILLMICGHYVQTDSSNVVSSIHRIFSIVITICLCPYFQFNPPFFHVIESVLYSILS  
QFTQYGFFFRYCSTIKTFDLLSGFKQIPLYTKRVCFFLLITLLVRLIIIVLIHFSAHQTKLKTFFCAFLIILSANTGH  
ILMTIMFSILNTRMTLIQKLFANNPIPVNIVGKNQNASHIKRVRKGLICYNNLLDTLKVAEKEIQFTLTVTYLCBV  
KRVKGLICYNNLLDTLKVAEKEIQFTLTVTYLCBV  
AVFAELTKNTVDKIKKILGSQLLRCSDESRLYELEITLEYVIQRPFSFSIWRVSLDASLPVAMTSLCITYVIVIL  
QLTQLRP  
>BmorGR30.2  
MYLRSKKSRLFSLFSFERMIKILLMICGHYVQTDSSNVVSSIHRIFSIVITICLCPYFQFNPPFFHVIESVLYSILS  
QFTQYGFFFRYCSTIKTFDLLSGFKQIPLYTKRVCFFLLITLLVRLIIIVLIHFSAHQTKLKTFFCAFLIILSANTGH  
ILMTIMFSILNTRMTLIQKLFANNPIPVNIVGKNQNASHIKRVRKGLICYNNLLDTLKVAEKEIQFTLTVTYLCBV  
PKIICYVYFVITVIYKSKFSGYNLVPLFDMILACMAVTAAPAVFAELTKNTVDKIKKILGSQLLRCSDESRLYELEI  
TLEYVIQRPFSFSIWRVSLDASLPVAMTSLCITYVIVILQLTQLRP  
>BmorGR30.3  
MYLRSKKSRLFSLFSFERMIKILLMICGHYVQTDSSNVVSSIHRIFSIVITICLCPYFQFNPPFFHVIESVLYSILS  
QFTQYGFFFRYCSTIKTFDLLSGFKQIPLYTKRVCFFLLITLLVRLIIIVLIHFSAHQTKLKTFFCAFLIILSANTGH  
ILMTIMFSILNTRMTLIQKLFANNPIPVNIVGKNQNASHIKRVRKGLICYNNLLDTLKVAEKEIQFTLTVTYLCBV  
PKIICYVYFVITVIYKSKFSGYNLVPLFDMILACMAVTAAPAVFAELTKNTVDKIKKILGSQLLRCSDES  
>BmorGR30.4  
MYLRSKKSRLFSLFSFERMIKILLMICGHYVQTDSSNVVSSIHRIFSIVITICLCPYFQFNPPFFHVIESVLYSILS  
QFTQYGFFFRYCSTIKTFDLLSGFKQIPLYTKRVCFFLLITLLVRLIIIVLIHFSAHQTKLKTFFCAFLIILSANTGH  
ILMTIMFSILNTRMTLIQKLFANNPIPVNIVGKNQNASHIKRVRKGLICYNNLLDTLKVAEKEIQFTLTVTYLCBV  
PKIICYVYFVITVIYKSKFSGYNLVPLFDMILACMAVTAAPAVFAELTKNTVDKIKKILGSQLLRCSDESRLYELEI  
TLEYVIQRPFSFSIWRVSLDASLPVAMTSLCITYVIVILQLTQLRP  
>BmorGR30.5  
MYLRSKKSRLFSLFSFERMIKILLMICGHYVQTDSSNVVSSIHRIFSIVITICLCPYFQFNPPFFHVIESVLYSILS  
QFTQYGFFFRYCSTIKTFDLLSGFKQIPLYTKRVCFFLLITLLVRLIIIVLIHFSAHQTKLKTFFCAFLIILSANTGH  
ILMTIMFSILNTRMTLIQKLFANNPIPVNIVGKNQNASHIKRVRKGLICYNNLLDTLKVAEKEIQFTLTVTYLCBV  
PKIICYVYFVITVIYKSKFSGYNLVPLFDMILACMAVTAAPAVFAELTKNTVDKIKKILGSQLLRCSDESRLYELEI  
TLEYVIQRPFSFSIWRVSLDASLPVAMTSLCITYVIVILQLTQLRP  
>BmorGR30.6  
MYLRSKKSRLFSLFSFERMIKILLMICGHYVQTDSSNVVSSIHRIFSIVITICLCPYFQFNPPFFHVIESVLYSILS  
QFTQYGFFFRYCSTIKTFDLLSGFKQIPLYTKRVCFFLLITLLVRLIIIVLIHFSAHQTKLKTFFCAFLIILSANTGH  
ILMTIMFSILNTRMTLIQKLFANNPIPVNIVGKNQNASHIKRVRKGLICYNNLLDTLKVAEKEIQFTLTVTYLCBV  
PKIICYVYFVITVIYKSKFSGYNLVPLFDMILACMAVTAAPAVFAELTKNTVDKIKKILGSQLLRCSDESRLYELEI  
TLEYVIQRPFSFSIWRVSLDASLPVAMTSLCITYVIVILQLTQLRP  
>BmorGR30.7  
MYLRSKKSRLFSLFSFERMIKILLMICGHYVQTDSSNVVSSIHRIFSIVITICLCPYFQFNPPFFHVIESVLYSILS  
QFTQYGFFFRYCSTIKTFDLLSGFKQIPLYTKRVCFFLLITLLVRLIIIVLIHFSAHQTKLKTFFCAFLIILSANTGH  
ILMTIMFSILNTRMTLIQKLFANNPIPVNIVGKNQNASHIKRVRKGLICYNNLLDTLKVAEKEIQFTLTVTYLCBV  
PKIICYVYFVITVIYKSKFSGYNLVPLFDMILACMAVTAAPAVFAELTKNTVDKIKKILGSQLLRCSDESRLYELEI  
TLEYVIQRPFSFSIWRVSLDASLPVAMTSLCITYVIVILQLTQLRP  
>BmorGR30.8  
MYLRSKKSRLFSLFSFERMIKILLMICGHYVQTDSSNVVSSIHRIFSIVITICLCPYFQFNPPFFHVIESVLYSILS  
QFTQYGFFFRYCSTIKTFDLLSGFKQIPLYTKRVCFFLLITLLVRLIIIVLIHFSAHQTKLKTFFCAFLIILSANTGH  
ILMTIMFSILNTRMTLIQKLFANNPIPVNIVGKNQNASHIKRVRKGLICYNNLLDTLKVAEKEIQFTLTVTYLCBV  
PKIICYVYFVITVIYKSKFSGYNLVPLFDMILACMAVTAAPAVFAELTKNTVDKIKKILGSQLLRCSDESRLYELEI  
TLEYVIQRPFSFSIWRVSLDASLPVAMTSLCITYVIVILQLTQLRP  
>BmorGR31  
MYLRSKKSRLFSLFSFERMIKILLMICGHYVQTDSSNVVSSIHRIFSIVITICLCPYFQFNPPFFHVIESVLYSILS  
QFTQYGFFFRYCSTIKTFDLLSGFKQIPLYTKRVCFFLLITLLVRLIIIVLIHFSAHQTKLKTFFCAFLIILSANTGH  
ILMTIMFSILNTRMTLIQKLFANNPIPVNIVGKNQNASHIKRVRKGLICYNNLLDTLKVAEKEIQFTLTVTYLCBV  
PKIICYVYFVITVIYKSKFSGYNLIPMLDMILACMAVTAAPALFAELTKNTVDKIKKILGSQLLRCSDESRLYELEI  
TLEYVIQRPFSFSIWRVSLDASLPVAMTSLCITYVIVILQLTQLRP  
>BmorGR32  
MCYTNFVSRQVSKCINFFSTIRYVIYLRMFCGLYINCSSSFKIRCIARLYCFIIYCLNLHYNLYIFTSSVSLTNFL  
HTFITLAEVSIHILFSLYTGESNFMSCIEMNKLTSGPIDFVATKCVATHFIAFFVIGLHILSSTLICGAEVSCFT  
FSVVLASMTFLTTLRSFTTIIMFDLVWIRMRLRKILVNALESDDLSEDEKVKSIESFLKAYKQIIASIRITKLAT  
RNLVTFNFBVSLFGKIMTLIYFCINCPGYLNTYLISSWIFGILLAGFVTCAPPVLVEMNVNELDEIKYALADQLVDY  
TDDKYRTAIYNALDYVEVHSIRYTLWKNFPMDLTMFFGFAGFCATYIIIGLLQFTY  
>BmorGR33  
MCYTNFVSRQVSKCIHFFSTIRYIIYLRMFCGLYINCSSSFKIRCIARLYCFIIYCLNLHYNLYIFTTNVSLTNFF  
HTFIIILAEVSVHILFSLYTGESNFI SCIEMNKLTSDPNEFIATKCVTHFIAYLIVSHILSSTLICGARASCFT  
FSVILTSMTFLTTLRSFTTIIMFDVWIRMRLRKILVNALESDLAENKAKSIESFLNAYKQIIASTRITKLAT  
RNLVIFNFBVSMFGRIMTLIYFCINNPGYLDYHMSLWIFGILLAGFVTCAPPVLVEMNVNELDEIKYALADQLVDY  
TDDNYRTAIYNALDYVEVHSIRYTLWKNFPMDLTMFFGFAGFCATYIIIGLLQFTY  
>BmorGR34  
MCYTNFVSRQVSKCIHFFSTIRYVIYLRMFCGLYIDCSSSFKIRCIARLYCFIIYCLNLHYNLYIFTSGVSLTNFF

YSFITFAEVSIIHILLPLYTGESSFMSFCIEMNKLTSGPNEFIATKCVATHFIALLVIVSHILSSTLMCGARASCFT  
FSVILASMMFLTTLLSRFTTIIIMFDVVWIRMRLRKILVNALESDLAEDEKAKSIENFLNAYKKVVIASIRITKLAT  
RNLVTFNFMFVGKIMTLIYFCINNPGYLNTYLISSWIFGILLAGFVTCAPPVLVEMNVLDEIKYALADQLVDY  
TDDNYRTAIYNALDYVEVHSIRYTLWKNFPMDLTMFFGFAGFCATYIIIGLLQFTY  
>BmorGR35  
MYSSLKLDYIVNLESVMCSDQSITISFKNVFTVFFDYISSLDFMMVCRLCFGYYYEFNCSNLCKIMFKCFSISVC  
IFCVSMHLVQLISPPYLNHCVIMLESTVSIITSLVTEDKYFFEFCLDMKDINSMMNQPRNIKSFKIIYVIIISGAIC  
HVIRHISICREKALSFCFSTEYLTASFIIISGYWNYLNIITMMFDLLYQRLVAVKQMLTNGLNICDTDEYKIKSVQK  
FIDVYKALTVSLKTSNLIKHTVSLGIFCALWRIIFFVYYCISMDFQVESAQFITWVSSMCLSVFLVYIPALIVEL  
CSNEVDAIKWILASELLEYRDKRLRTSLRDALDYIDVCPIDFEIWHCFPMNLSLCLGFDISSSYIISIL  
QFKY  
>BmorGR36  
MTVPYDKIKSALSKEFVQLLFSINVVLVVRFLFGFYMKIGSRKYFHIATKIWIIVTLTIFRVYFQCRNFMNYPYALI  
LHDFCTCTVELVILCISSLGGEQHFYTYCSEMAELIDNRKNKRASYFTTSTLLIGFIIILIVPTSISCKKVSNALSM  
LFLNIFNYVACFMHHLTIIVFELLWREIRKCRISLERLEIMSVDDKIMKIENFLDSYKRLSDSLNKANGVMIPTM  
ALAYFAIIAKIVFFTYNLSLRGFNILVHGDSWLLSTSIAIIFICAPALLVELAANEVNKIQNLLAVELLKMKDDK  
F  
>BmorGR37  
MSAKINYQDKLCSIKSIMYLGFCGLYFRSSTSRMMLLMTKVYICIVLLFLGISFHLNMLSSDLPTETTLHSSIIML  
EFFIHIITSVSTGQAKFLHFCTEMMKINGHNSKGSDFQLVITNIALIIIIITQTTSSLLYCIIRSKCLSHSYVFT  
VITSLCVLFSSFTMIIKYELIWNTVRSKNTLVSNLDSFDLSEQEKVNSVYNFLSTYRDIKANVDLTIKGTRTMI  
FNLFFLVFKILFLVYYCIINAENLDCLHASARVSAIVLSVAVTCIAPILVEINVYEFGRIFKALADQLLEYTDNNF  
RIALHDALDYIEVHSIRCSIWKNYPMDLNLGIFISVCATYTISILQFSY  
>BmorGR38  
MKPKYVTNIKLVLFLRFLCGYYYEMEIPRRLKTVAKAYCIFFLFFYLVLHHLVYCSFSNHTAKWSLYLEYSIYVFM  
LYSKKMYLMDYYTSSRIIDFEPHSRIYKKLNIYLAAILPFLVVLKIVNMVTFCLSKSFNCWSWVSLHNLNWNFTV  
LGRIPPVFV FALLFCRTRIIRRTLVSITVGPSTVLKSLFKCTRYWLTVLKRPNTHLNSCYFFQLTVFLLCSTPKL  
ILETFLMLNKIKESGPIVEKLAVYAIETFYTHLFFVVSILFIDLINVDLQRIKILIVEKRMKTNTKHKRIEVEKLF  
QFVKSQTIECTLWRVLSLNVNLSFVSFAVTTIIAVALQIKNNNIY  
>BmorGR39  
MNVSPQYSVLKIFKPLFKVQTLFGSVRVKVGDNGITKTTLKQKFYSIFNILFATTGHFYTSFVYSVCVPCVGN  
SVAE  
ETSMALIQUIYAGHLMNSFIVFSNTFLHYEKNVQMFKSLCSIDELMKIVRLEHRDLKLFIAIILLSSSTVIMNVYFL  
IYMVIIIPISEKWVPFANIGIMNEDLEAITFVSVLYMLYDRVKYINQ TALDPVNI AKLIKESDQONDEETVSRILK  
AFKEISKAYKIVEKTRFVFFMFLVIHMFQQMLTVEILIVLSDNLSWGT FMSKNLIGVKFIARIMLISVCVSYLER  
ELQKTKGLCNLAVRNCENDIVRCHLKNITYRIIDTEIEPMTVFGLFYINNVPDLISLTATYTVVLL  
QFAFL  
>BmorGR40  
SMLVFCVLWSGLCYTGFIGICGMNFIWIATFMGRMVPLIFGILLCRIRMFRLTQKQGFNDLPYNRFSPPRYIMM  
YDSIVRGLEKTD FPAKNIMFVFTICIYSKILTGLFDLISVLKREGPKLMNVMLFTLEFLPSYVLLMIYSVTLDMVS  
TEMKEILKIVTEKRVFCKDKSHANIQELCQYIKNNQLKYTIWRLVSLNMQSLLRATSFCIVSTIAILQIKDWNG  
>BmorGR41  
MSENSELEYIHMSFSPIYKYQKFLGNSRISLKAKNKITVANNWEKLYAFLWMLAASYSIHHFISFFYSYYEYRSNI  
IFLACSLGISMHYLTYILTYDKFLTREADIDLFDIQKIDRLCLKDRCTVLFKKFRLINIFLLILVTVPFISGF  
LIHVFYIDKPYKTFGLGLGVTITYVDVLVTAFFITKLTRLAYINDRIAMYNKINIPHKKYSGIRRSILWIFGWR  
IFKIMPKIKKNGTREKKSTFIKYPSEIIFNILKCYRSITEIYSLPVFLITATVSIWTFVLVIGSLVAGSRSEIKIFPV  
VAMITVGLWNFYIIQLTSLAFVNDLFLMEVKNTKQLCISVLLYTCDDSINKAANTILKNIIECVPIIFSVYGI FVF  
DKSIIILFLFGIITSNVMTVIQFSY  
>BmorGR42  
MNKTKKIERLSRDILDEDFIDVFKSIFIFQRI FGLLSVNITYKYITETSKLYKLFVMSLWTVNVLCVLDYILNYRT  
SFDVATDSMLKLVMSVNVTNALIVWRNNFKLNTLKSQIYVKLQNLDRDLKTKDAVTMNNKLSALSALMICGFIW  
CTIWL FVYNAIAMNTFCVPLTIILSANVGNWLEMVLLFIIFYFVNVRAEYVNKL LRRRLNQTECPDRVFLIQNAKP  
SDTVSREFICGMQSLEEIIGNIKDIYQFPFI FLSTCQVMLCILVIVQNLIISVKEQMGGRAHSPPGFKWLLLEPIDIY  
NTSTMVDSMLCMLPALLMLTIFFSLCVIAEALTSKLDITKKLCAMGMHSFTDDISRSSKQIVLLLEAKRSMSVF  
NIYTLGTRLP IHL LGVTASYTIVLLQFAVL  
>BmorGR43  
MKSPEYLSKDILDEDFVRVFRFPFLVQMALGSCRVLHKARFITIPTLGQKLYTVMSIIICSLLYFNITKLYISLYY  
QHSIVYYLFLAVAGLDQLSFFANLIHVRFLNGETNTGFCIMMQRIDRKMKIDHNNIFNKTVIRANILTITLILLY  
MSLVISTIILKKYSLVTLFGLVHGQLILLVEMAYCSNLIIFFFIRVRVFNAIKKNHVPENQNQPPKLVRYFVTNR  
IMRYLAAQTHDFIVNDTDVYLKQIFEGFSMFIIDYRFQASMPLLHKANCNEPANLRILLGWDTKKFFHTEFGSLIN  
SPCDFAFFFSQEKIAGSPPARQVLASKNLANYVIVHSVIGFITALYISGRCEFFFREIRETKRLAVAVLLKYQEG  
TILTIAYFPKLS  
>BmorGR44  
LGGSRVAICLPFEHLALFLGVSCSYKISGMPVWTPQLQIVVLSMTSGTRGASRCTTLVLDVLRRLRMNFKRLLEK  
TMQSEISNQKYQFLEQFAEHYRYLLEALDSTRPHSAIVVTTMLMTSFVKVLI I IYFVITNSIMTIDNSRLTYMMM  
TSFEVAAVSVAPALLEMANNEKDQIIMILADQLLKYTDSKLRRSVYDVVEYITVAPPTVTIWPFTVDLGLYMDFI  
GLTVCYCIMILQFEY  
>BmorGR45  
MKSPEYLSKDILDEDFVRVFSFPFLVQMALGSCRVLHKARFITVPTLGQKLYTVMCIIICSLMYFNMTKLYLPLYY

EHSIVYYIFVTVTGLDQLSFFANLIHLRFLNGETNTAFYIMMQRIDRNMKIDHNNIFNKTVTLANILTITITLIILHY  
VGLVISTITILKEYSLLSLFGLLYGQLMLMVEMALCSNLIIFFFMRVRVFNNAIKNHVHPENQNQPPKLVRYFITNR  
ITRYLAAQTHDFIVNDTDVYLKQIFEGFSMFIDIYRFQVCPLCIKLVVLTLNFEFCLVAIQRNVLGPNHIGNYYI  
IVNSVMGFFTALYVSGRCELFFREIRETKRLSAVALLQYQEGPLREKATRMLKIIESTPQFSIYDMWQMDGYTFV  
KICSLVTNLIVTLLQFAYL

>BmorGR46

MITMKSPEYLSKDILDEDFVRVFRFPFLVQMALGSCRVLKARFITIPTLGQKLYTVMSIIICSLLYFNITKLYLP  
LYYQHSIVYYLFLAVTGLDQLSFFANLIHVRFLNGETNTAF CIMMQRIDRNMKIDHNNILNKT VIRANIFTITFI  
LIYVVLVISTIMLNEYSLVTLFGLLYGQLIFMVEMAHCSNLILFFFTVRVFNNAIKNHVHPENQNQPPKLVRYFV  
TNRITRYLAAQTHDFIVNDTDVYLKQIFEGFSMFTDIYRFQVCLFCIKIVVLSLLTFELCFVAVQRNLLKETKNLTN  
YYIMTYSVIGFFTALYVSGRCELFFREIRETKRLAVALLQYQEGPLREKATRMLKIIESTPQFSVYDMWNMDGY  
IFIRICSLVTNLIVTLLQFAYL

>BmorGR47

MIDFKTRNVCDINTIMKIRFLFGFYCDFPFNKRFQNILKFYCISVLVVLILGSWACSTGFRSDKKIYIYCEYIAYF  
LISLSTKDRYIFDYKQQLIDGSTTSKVLYKKLERLLKYFVTITIVLKMLNIFVFCGWNLTKCINELDGVLFINL  
LWIGLLLARLSLPVIYGLLYFRLRVLRTLESKGFSNSPQNRFTPKKYITIYEKIMKDLLKMDYPLKYVFIIFLIG  
SVPKLLQNSWQFLNSLKNYGPEISKILEFTLECLHSYIVILPIVVALDLSDEIKMKIITLNRKLACLNERNQKM  
EIQQLFLLLKNNSLRYNLWRVVPVNLKSVLIFLSFGVTNAIAIMQAKNLN

>BmorGR48

MTVFMLKAQVDQDTILEKVVKPLNNTMFNNQEWFSQQDSAPGCSLGTSSQYLTYILTITYDKFLTREADIDLFINL  
QKIDRLKLDRCTVLFKKIRLIYIFLLILVTPFISGFLIHVFDYIDQPYKTFFLGLGLTIYVDVLVTAFFIANL  
TLRLAYINDRIAMYYKRSPLRKDSGIRRSRWICGSWIFQIMPKIKNNGTRMKNYTFIKYQSLIFNILKCYRLIT  
EIYSLPVFLITATVSIWTFVLVIGSIVAGSRSEIKLFSIVAMITVGLWILFFIIQLTSLAFVNDLFLMEVKNTKQLC  
IRVLSYTRDSDINKAVNTILKDIEYAPPIFSVYGIFVFDKSIILFLIGIITGNIMTVIQFSY

>BmorGR49

MAGIRTISFKVKPLELPDVSENNFADDGLKIVQRKFFIYIQVITGINRLYLLKCNKFVMLFSYLYAIFLISFVAS  
VYWTKEPMKNSHLVIRLFSFIEYILLICISVFLKMKMMKFENLSMFDQILKIDKNVNSTFCMKRVFFVWTGSIV  
YNLIEFYALEFYDNTSKGLMTIICTYTIALTHDCEQIFFFTLQRVVYLRLLVVKRHIQEHFKVDEDSNRKKPNKYE  
MLSKNVQLNLTALHEVYGLLHNCAEKLNKIMSI PVLLMLFTSGLTTTTILLKILVRVIQLADPSNPGPAAIGVCVYL  
IVHCIKYTLLVVI PCYSSITATQVSLIRITLHDAINTIPLGKCKLQRRKVKAFYLMTKEYSFVYTLAGVIKLNMS  
LPLSYISLCTTYLVII IQFSKFLD

>BmorGR50

MAGIRTISSKVKPLELPDVSENNFADDGLKIVQPFKFFIYIQAITGINRLYLLKCNKFVMLFSYLYAIFLISFVAL  
VYWTTEPKKNSHLVIRLFTFFEYTLACISVFLKMKMKKFENLSLDDKMLKINKNVNSTCCMKQVFFVWTGSIV  
YNLIEFYAMEFYDNTNKGKLTICTYATIALAHDCQIFFFTLQRVVYLRLLVVKRHIQEFYFKVDEDSNRKKPNKYE  
MLSNNVQLNLTALHEVYALLHNCAEKLNTVMSIPVLLMLFTSGLSTTILLKFFVRVIQLTDPSPNGSAIGVCMYLI  
VRCIKYTLLVVISCYSSITATQVSLIRITIHDAINTVPLGKLQRRKVKAFYLMTKEYSFVYALAGVIKLNMSLPL  
SYISLCTTYLVII IQFSKFLD

>BmorGR51

MAMGIRTILSKVKPLELPDVSENNFADDGLKIVQRKFFIYIQVLTGINRLYLLKCNKFVMLFSYLYAIFLISFVA  
SVYWTKEPMKNSHLVIRLFSFIEYILLICISVFLKMKMKKFENLSMFDQILKIDKNVNSTFCMKRVFFVWTGSI  
VYNLIEFYALEFYDNTSKGLMTIICTYTIALTHDCEQIFFFTLQRVVYLRLLVVKRHIQEHFKVDEDSNRKKPNKY  
EMLSKNVQLNLTALHEVYGLLHNCAEKLNKIMSI PVLLMLFTSGLSTTILLRILVRVIQLADPSNPGSAIGLCVYL  
IVRCIKYTLLVVISCYSSITATQVSLIRITINDAINTIAPGKLQRRKVKAFYLMTKEYSFVYTLAGVIKLNMSLP  
LSYISLCTTYLVII IQFSKFFD

>BmorGR52

MAGIRTISSKVKPLELPDVSENNFADDGLKIVQRKFFIYIQVITGINRLYLLKCNKFVMLFSYLYAMFLISFVVL  
VYWTTEAMKNSNLVIRNFTCLEYILLICIAMFLKMKMKKFENLSCLDKMLKIDKNVNSTCCMKRVSFVWAGSIV  
YNLIEFYAIEFYDNTNKGKLTICTYTFALAHDCQIFFFTLQRVVYLRLLVVKRHIQEFYFKVDEDSNRKKPNKYE  
MLSNNVQLNLTALHEVYALLHNCAEKLNTVMSIPVLLILFTSGLSTTILLKILVRVIQFTDPSNPGQQQSECACICI  
ASNTRCLSRAITQASLQLKFLLFVSRFMMPSLTFHWVSKLQRRKVKAFYLMTKEYSFVYTLAGVIKLNMSLPLSYI  
SLCTTYLVII IQFSKFLD

>BmorGR53

MAHIKDENSQSQQQKEHETLNKNKLLKKVYTLKPALMLENWFGLSDFLLVNEDELVLMLQTEKFGVILSIFFI VMF  
AVFVDFPDTETESIMELMDEVPSMVVLSQFYFIASITTSCLSAIAIRIFETFADLDSMLLITTTQDFYNKSRYQTN  
KYLIIILGVSHIISSTLDDLTDDEIVWCKFFVLPIYFLQKLEVLTFCKLIVMIQCRLQINKYLTNFIIEQEKNKAL  
VFTLAESNPKKTDFKNWIGCPSPNNMKIRDLATMYDVIETICSLINDLFNIQIFMTLVSTFTYIVIAIWSTLYFYR  
APNFTFTGLTTII IWCITII LSVVMSFVCERLVSVRNNTKILVNKVINNYDLPKTMRVQAKAFMELIESWPLKIM  
VYDMFSVDISLMLKFISVATTYLVII IQLSHFV

>BmorGR54

MTHAALPRSEAYFLMTLSRSTIVSKRAYGPPDGEWLPSPMDFSNARGRAKPLPTVCLRVCVQNNLSFYRPILIILO  
LCGYDFDYININLVNLVLTKAYCASLTCVVVYATIACSSIQLSHIWSLIEYGTSVVI IACFRSQTKLFLKQLTTL  
DVYLRISNRRFVLEKCKIFTITSVIFLLRIVYTSIYCSHHCNFVLIYFLLSQFALVCLD VNRIWRCIVFDAIRYR  
LKTLLRMEENPDCCNYLYVKNKNSIRKNKISFCFLYRTIADLVLDLVSPELNVSRSTTNICGLKTHIRGAPKTA  
DTSCTRYSSLPEKNQCCISILFLSVACSLPKIVSNAYHLLLI IEDREPLETGGYVLMHTLQVSLLLFTPFIVECY  
TMEVEKIKLYLVHRLIDENDTTMRDNIRLFLEYMSVRTFRYRIFRIVPNATLPLELVNLCVNYVIVLINFTHLYG

>BmorGR55

MERINLLKSFAFLENVMCIYRNFMFYNQRARFIIIGRIVAELVFYIFSAYNGFLLVYTDWFSQNFSVFFIEIISK



SFYVITFFTMVNGILKSREYKTFIFSINKIHDYILNDTDYLRKLRKCTNIFCTATIIILFVVTLIRTAIDGSNYGQL  
SGINARSVIWMLTTLILECQYQTECVVYFGFILFIHAIMKYLNIRVTNTIIKIARSDMAVKRIPKYIIGRTELKDE  
TDTGVDVNNVVDLEEVRWVFIYRQLGLTTELLQKCFGMQTAFIFVTAVLNQIITVFRVIAVFIYGS LANRGAEHS  
IIANFLFTLLYRPLGLLMIIVGGQMVQNQTDMLRRSMARLNNIISNNPHRETFSSALSDFHRMIVKNPVKIIYVLSVL  
PVGAYMLPLFMTLLINHIIILLQFNHVA

>BmorGR56

MKKIRLLRSIVFLENLLCIYRNFLFFNKKARAIILIHITIELVLYVLSIVNNSFIIYSYFHSNRSMLIVFTTICC  
FYVVTFSIVMGILRSEEFKDLVTSLELINFNFTNNTYKLSLGRSNTMIIAITTILYCVTCIGIAVDKITLNDFY  
EFTSSDVIWTVSSTLLELRYQTECVVYFGIEYLFILFTKHLNLLVKEAIKKVSLDNNGTVKDVPISSDAVTKNEVK  
RWATIYRQLMMSSKLLQACFSLQIICVFVSAVINFITTAFRMVKVSVLGSIATDMNEIIIVNLIFTLLYQNI GLVL  
IIVTQQRVWNQILLNVLARLYNGILIQPCRDTRLTKNLQRMVVKNPVQIKMLS VLPVGSYMLP FMFTLSVSYI  
IVMLQFGHV

>BmorGR57

MEEIKAIKLVTFIENCICVYRNYAMCTKRNKIIISLRIVEIIIVFFVNINNILLHKYYNGSGLLYIIYFLVYVY  
YINYMFCIFYGALQKGAYRQLIFCFNKINAIKRDKSYKKS LARLKNMCIVISIALLIISALS VFVDRSNSWNIYE  
VSLRDSLLILSKIHMDFYHFYEVVYFTHIKIFHLTLRYLNSRVKMAQFEMKMTRRDVHDEGERNIRILLTKELTT  
EWAVLYKCLVFGTKTMSLFLGLQMLIAMVMSFVNFTLSLYGIIILICSIEQSQTASQHNLLILTYTATMLLI FIV  
AQSVYNEVEMLKRNLARMYNILAVDSDETQQKLVDKFLRMVYKNKVEIKMLSIFPVGMPMLTFFLSLSASVYVVMV  
QFSNVF

>BmorGR58

MSSRRVLYRAEVLLSNNVDAHVDMLKPLNFFQFILFFPKYTIRDGYITPNSLIRNIWSATGAFVFISICVFRILT  
MNKIAVYDTFTTMLLISKYFDVALYCIGFIVNTYVNIAYSNNVLLYKLQTIKTFIPRNEIMKNVKWYSVILII  
VLF CGTLAMFSFFHLSFSYFNIFDLTTDLAVFSFDLNLVYACSVLNFLAQSLDELNKEIWR LGNAKVTVCKDGSKP  
DWNGINLTYINVLDAYNYFKEAFRLIIFHFTFKTLTHMFIYIQSIIELCKKFYPGDDYDAITVGAVVGWVFRNIT  
LQCLVGVSQCNFYSATSNTESICAVQVGSIVSDEHKFLKAVRRLNNVVFYKWSMYGMFIVDATLPRRLIELIATY  
TVVFLQFAFK

>BmorGR59

MPYKKDSNRCEVLLYNNVDTLQDMLRPLNFIQTIYLSPKYTIK DGYITPNSLFCNILSAGAIVFFSICVYRILT  
ASKIGTFEGFSTLLITKYFDAILFSLGFVANAYVSIRLSHLNVL LYLKLQAIKTFVPCKKIMQKVKYYSIVLIIG  
LIIIVRLIMYIHFHWSLGYLSYLDLITDLGVISFDLNLVYASSIVKFLGYNLEELNKEILRLDEIKATMDEEGSKPD  
WNGIRRTYLFKFSEAYNYFKDAFRILIFHFTLNTFAHVFIYVQSVIELCKAPADNYMGGRAHSPPGVKWLLLEPLDIY  
NSAAFSVLIAVIVWLLRNIIQLSLIGISCQS FYSATSNTQSI CSILVRSVLSGEYNQWFL LKKYDVETHFFIAYVV  
GRAHSPSGVKWLLLEPIDIYNVNSTTHLEI

>BmorGR60

MLTPRSDL CNEKLSPSFSPSGKTTAADKDDTEARCQVDSSLERLLLPFNLVQHVSFI PMYSIRRGVSPDGPLAYLY  
SLLGFCFLT SVSVYRNAIMHGTRLSSSLHLFTLYSDLVSFVINYSLSLICNVVNSKSNVEFVCRLQRLQTVLRRNQ  
EQEQFARSNWAHLAVTALYLAVVGLLNVVVLKQSLPDTLYLL LFCIDVNVLYATRMLALLRCYLQLWTRKINEK  
AFNPVHHNMFTAYLDLILQEYEVYTTLFKKIITYYVLETFLHGLLYVQVAIQICKSIRSRGRFSEQLM MIVSIFTWT  
IKNMIIMTLHNVECEKFYLAVEQAVAACQTQRASTTRCREEKRLYKNVCRVSRAAFSRERGWGLLAAGAALT LRFM  
DLATTYVTVLLQFAFVSRT

>BmorGR61

MSIRFEKDLLHNYVEIELQYFLRPFNVMQSLFFQSKYRIVDNFILPNTL FKNIMSFVVSVLCALSFYITIISVWQN  
THATSFHALVTSVYLSYNIYGILIGSVLIIWLSDRNIEFVLKIQDLIKILEFNKCF LIEYAFINSIIMAAFILNF  
LLYGYFVVHLQKFALGLTFSAIVCILNQDLDIYVIIIFANILKKCASRWTVEARQKNFNNDQGWVKLFN AFLNLT  
ESYQLYQKIFEFYELLRRVGIVFLGLQLTVCRVCSNDIKSIQCTVMLHAFQLICVWIVKKFITLSILSFEMEIFYE  
KLREIETVCIILVSSDNP SERELKIWKNIIRVSSCSVRKTTACGLCEVGAALPQWLLQATTAYTIVLLQFHITTF  
RATNDIYDL

>BmorGR62

MNDLFLSKIVKWKTKTKYKLDDDFQSLFRVFNIAQAMNLC PKFLIYDKYITNNAWFIHILAIS SFIVLVCLDSFFA  
NFRVLVSEAMGPFFYGFYSFYFISILYENIGVIIQITMNGYLTKNVLIITKLQDTFKDFRTTDYITKSNRWTNWFI  
FFIYMNFIANYSYFNFYVNTFSFHKCFAFIKMCFDLNIVYTI FIFKMI GDSLTMFKDTAFCSKNMKLYEVS NRVY  
WNKMLRLYSNILDVFELSKRTL NFFIIFYFVSNILLRILSHVQLAILMNSINWLQHVAYSNI VMVLLTLAKEGIILI  
VLI AKCEKIYCVIGDVQTACQLALGNAACPEKRRFCKNVRSSSAAFSKIYICN ILAVDAKLAVSLMSVTTTYTIV  
MLQAILIK

>BmorGR63

MQIGNAVIHLKSTKLTTMNTISPTTKLLKIFALNSNIEEIDLK CSTKL RITMTAFVLC SLIFYSLYYKFIVYFDYV  
NISIKITDCVQMVYDFCQYIVDLYFVTNYGRNISSEYFQQYKIDKILEVV CYEIIKHRIVKLLWVFMCIWFSSC  
FDFIAWFLNYGWITPLVSVAYIFLLIKILTTLDL SAHIMNVEIRLKM IADLIHHYMSCEDNFQAEETLCHKNWL  
NSKERAKYYELQFRIHALKQLSCNNNEIKLLSRCYLMLEQVEI INRMYGFRILLNSL SLLIDMVRFTNISVRIMI  
GSQNLAYNCGYFPAVSSI FRL LTCGAVIINLVSHCERVYQRT RICNVIDHMI VKNKLSRESTEALQEF RNLVQNH  
PIEFNMANFFQLNYSLLVSIASVVVYTYIILLQSVN

>BmorGR64

MKISLRKIVSIRNMTLIQNMFGFYHKFTDNRAIGVLLKIFCGFYSLFLSFLCINCTPRFTNDFLT YDIFFFVIEYL  
TSVLVCLLYDGQYFLNLYLDLKLIDREAGIEESLEKLPISQPLFSLIFT RVIYLLSCLLMFDGIKDSLFLPAQSS  
VFGANFTEFARTIGYFPRVIMFEMFYKRVNYLKSQLRNDLAHANLYPIGFVCSKVIMKYINFYKLLLRNLQQNSLQ  
FKILMSMSSLYIIIKALASAYAFIYREDGVHVFIFIEFATGVFLFFVMSSIIISIFNEIEDIRQIVLAQLRYCKQG  
ANTKRVDQALTILNIRCFKYALCRIYTVDFTFILRILDVSVTYVIVLVQFTHILD

>BmorGR65

MKISLRKIVSIRNMTLMQNMFGFYHKFTDNRSIGVLLKIFCGFYSLFLSFLCINCIPRFTNDFLTNYNIFFYVIEYL  
TSVLVCLLYDQGQYFLNLYDLKLIDREAGIEESLEKLPISQPLFSLIFITRVIYLLSCLLMFDDGIKDSFLFLPAQSS  
VFGANFTEFARTIGYFPRVIMFEMFYKRVNYLKSQRLNDLAHANLYPIGFVCSKVIMKYINFYKLLLRNLQONSLQ  
FKILMSMSALYII I KALATAYAFIYCEDGIHVFI FIEFAIGVFLFFVMSSII ISIFNEIEDIRQIVLAQLRYCKQG  
ANTKRVDALITILNIRSPKYALCRIYTVDFTFILRILDVSVTYVIVLVQFTHVLD

>BmorGR67

MRERKKKFNKLLNTRNYNNIVEALLPSDSIRKISGVSVVYLAVNSENRIVTKFSFIGTIFFLFWYIIFYCTYKAH  
SEDQITILRTIYNTKLKRYGDDFERIASIIYVTYSMWKVPFRMSGNQVFIQRIVDIDSAIENMGAEVDYNKNAKTAL  
VISIAQLGDFLVRMFCIWLSENLSVIVPTEKLYQVVYTDALS FVITSHYCFSLIVLRGRYKYINKVLSEIKTRSA  
WEYKVFVRNKVAPDLEKVRQLQDRIVCEKIKACARIYSMLYKATEAINRMYGTALVLTMLLYLVFIILYMFYFMEA  
TASGLLYDIKKYVDFLICVFWQMSHALSIIYANVYFSESITREVCKF

>BmorGR66

MKRKLLKKFFPNKEYNNIVEATHLWKLIRKLTGLSVLTLESKEGNRIETRFSSLG FVFFLLWFTIIFYCTYKAHNED  
QTILRNIYSTKLQRYGDDFERITSIIYVLYSMWKLPFQISGNRLLLQEIVDIDKAIESVGVTDIDYKKNATFALFIY  
IGQIATYLFRLFCVWGCLGNLNSPVPVEKLYQDIFTDALSLLLTSQYCFSLVILRDRCRYINKILCGIENRESSRL  
RLFYVSSMPGAEKDITCRKIKDCSKIYGMIIYKAVESTNITYGFALVLTMLLYLIFIILYMFYFMEATAAGFLDTK  
KYIDFLICVLSELLHAMLII FLNIYFSEETVKETRTTSFVIHGI INSDFNTQAKTEAIHFSTQLLHQIPKFTASGL  
381VELNYSLLYEVG GILVVP401MGSGNNLATDGP RVCSP I

>BmorGR68

MRFGKAGAAVVTILRPYNLCLKNIFKPFYVMLSLLGLFPYSIRFLGGKQFLIKPKSIYTNVAVCALSLMLSMTLFL  
IFHIDHIIYKSTEDNSLTEGFMTQVNYIIEMLNLEIFCVVYFSSFLNRNKFVKVLNTVAVWSDRISISGIKTLFS  
LRLKIHFSIGILMFLLSIQVCVNFTRVDSLWKKVLVMFTFNIPQMIQFTAILFYIILVNMVITLLVIIQENISIST  
RDTKTSSSIRVEHRMPLSLKQLELIYIKAFELKRDINKAFEAPILLTMMQCFHSIVSESHIIYHGAVMEPHMVLHS  
IMNCSVWILYQLFKLYILASTGHLLQEKIQHFSNLIHFHGKGLTVYGLFPLDGTLMFKVVASAAMYLIILVQFDKR  
N

>SfruGR30

MSELSFDIYENITNMDQNI THYPPEATVLAACACIFSVVG VVGNLVTTVALLMHPKLRGHVTTMFVLSLCVSDLL  
FCSINLPLTANRYIKQNSWLSGSLCQMFAFVFYGN EAVSLLSMVAITINRYTLIAYYDMYSQIYTTTKIWWQLLLI  
WLVSFGLMVPPLLGWVGQLGLDPSTFSCITILPKEGRSPKKCLFVVG FALPCVVIIVSYSCIYWRVRQSKRKEGRR  
CVCGLSGQTAKEKEEDSRLTTLMLTIFLCFLACFLPLMIMNVADDGITYPWLHIIASILAWASSVINPLIYAATN  
RQYRAAYANLLKFCKNSTVKKRTTWGSR TMANSSNSPHYADKRNHMKDKPADL

>SfruGR1

MNKEHGFRVYNPNPNVNKETRKREMFQRIDEKDG IKEYDAKDLYGPEITDKDGALLDAHDSFYITTKSLLVL FQIMG  
VMPIMRVPKHAQTTRTTFNWISKATLWAYLVWGLECIIVVKVGRERLANFQNSSNKR FDEVIYNIIFLSILIPH  
LLPIASWRHGPQVAIFKNMWTHYQLKYLKITGTPIVFPNLYSLTWGLCVFSWGLSFAVILSQHYLQDDFELWHSFA  
YYHIIAMLDGFCSLWYINCNAFGTASRGLAMNLHKALGAEHPALKVAQYRHLWVDLSHMMQQLGRAYSNMYGIYCM  
VIFFTTTISLYGALSEILEHGLSYKEMGLFVI VGYCMTLLYII CNEAYHASRKVGLEFQVRLNVLNLAIDRSTQR  
EVEMLVVAISKNPPI MNLDGFTNINRELF TANVSFMSTYILIVLMQFKLTLLRQSARKT LKSIKVAVFNTSTTMLDD  
DFDEEGEE

>SfruGR12

MKVYSLSSRSPEQPCHFHGCLRHARVARWLGFFPVQGLGEIRPEGIRFKIKSFYSIIYAVATLLGQVMMSYFALLL  
FFQTEVTLSISINIVFYVTSITNILLKLAAQWPYLMTKAVETERGLTELTDHKVAGRSSVLAYLVMALAMVEH  
ILCTSFNIK FVMYCLQEAGVTTNVMENYVHRMPYIFNYIPYSFFSAIFFEYLCLOSTFLWSFNDV IITCFSIYIT  
AYFKTLNVVIATNVKDKDGIPWSILRVHYSNLVKLVKEIDDHISLILSFFTDLFYICLQLFNSLHRNHVSFKY  
CDETQTNQALSSPFYLLYYLSFVFLVLRALMLS L FASN VHC AALEPVYSVYDVPSSVYDNEVRRFQLQLHYTEVG  
LSGKFFYVTRNMILKV

>SfruGR2

MRHIQQNKTVYEKTQRDYEQEQRDLLSSQDGTCEIHDQFYRDHKL LVLFRALAVMPITRSRPGTITFSWKS RAT  
MYAVCFYIAATAVVLIVGYERIMILRSIRRFDDYIYAILFVIFLVPHFWIPFVGWGV AHQVAIYKTNWGFQV RYY  
RVTGENLQFPNLKTTI V IISVGCLLLAVCFLLSLCILMDGFLLIHTSAYYHII TMINMNCALWYINCKGKIASQS  
LSECFRRDVEQECSAQLISRYRYLWNLSELLQSLGNAYARTYSTYCLFMFANITIAVYGALSEIVDHGFGFSFKE  
MGLFVDAAYCSTLFFIFVDCSHKSTLTVAAGVQDTLLSIDVLAVDRPTQKEIDHFIQAIEMNPAVVSLKGYAHVNR  
ELLTSAISMIAIYLIVLLQFKISLPKDPQTVGT

## IRs/iGluRs:

>DmelGluRIIC

MWQRILLGCMWSAFFMCRSRGQQINIGAFFYDDELELEKEFMTVVNAINGPESEQTMRFYPLIKRLKPEDGSVTM  
QEHACDLIDNGVAAIFGPSSKAASDIVALVCNSTGIPHIEFDISDEG IQAEKPNHQMTLNLYP AQAILSKAYADIV  
QNFGWRKFTIIVYDADDARAAARLQDLLQLREVHNDVVRVRKFHKDDDFRVMWKSIRGERRVVLDCEPNMLVELLNS  
STEFGLTGQYNIHFLTNLETYTDHLEELAADNETFAVNI TAARLLVNPDP PPYSLPYGYVTQRDNIVYESSDPRT  
LIHDLIHDALQLFAQSWRNASFFYPDRMVVPRITCDFAASGGRTWAMGRYLARLMKGTSGVNNTNFRTSILQFDED  
GQRITFNIEVYDPLDGIGIAIWDPRGQITQLNV DVKAQKKMIYRVATRIGPPYFSYNETARELNLTGNALYQGYAV  
DLIDAIARHVGFEYVFPVADQQY GKL DKETKQWNGIIGEII NNDAHMGICDLTITQARKTAVDFTVPFMQLGVSI  
LAYKSPHVEKTLDAYLAPFGGEVWIIWILISVFMVTF LKTIVARISKMDWENPHPCNRDPEVLENQWRIHNTGWLTV  
ASIMTAGCDILPRSPQVRMF EATWWIFAI I IANSYTANLAAFLTSSKMEGSIANLKDLSAQKKVKFGTIYGGSTYN  
LLADSNETVYRLAFNL MNDDPSAYTKDNLEGVDRVRKNRGDYMF LMETTTLEYHREQNCDLRSVGEKFG EKHYAI  
AVPFGAEYRSNLSVAILKL SERGELYDLKQKWWKNPNASC FEEDPDATPDMTFEELRGIFYTLYAGILIAFLIGI  
TEFLVYVQQVALEERLTFKDAFKKEIRFVL CVWNNRKP I VAGTPISSVRTTPRRSLDKSLDRTPKSSRRV VIGRSS

EEMREMAQSGSGSSSGSNNAGRGEKEARV

>DmelGluRIIA

MRLCPVVIYAFIIIIIGFLEGIIALGGDDRNEITVGAI FYENEKEIELSFDQAFREVNNMKFSELRFVTIKRYMPTN  
DSFLLQQITCELSINGVAAIFGPSSKAASDIVAQIANATGIPHIEYDLKLEATRQEQLNHQMSINVAPSLSVLSRA  
YFEI IKSNEYEWRTFTLLIYETPEGLARLQDLMNIQALNSDYVKLRNLADYADDYRILWKETDETFFHEQRI ILDCEPK  
TLKELLKVSIDFKLQGPFRNWFLTHLDTHNSGLRDIYNEDFKANITSVRLKVVDANPFERKKTRLTKVDQILGNQT  
MLPILIIDAVVLFASSARNVIAAMQPFHPPNRHCGSSSPWMLGAFIVNEMKTI SEDDVEPHFKTENMKLDEYQORI  
HFNLEIYKPTVNEPMMVWTPDNGIKKRLNLNLELESAGTTQDFSEQRKVYTVVTHYEEPYFMMKEDHENFRGREKYE  
GYAVDLISKLSLSEMEFDYEFMIVNGNGKYNPETKQWDGIRKLI DHHAQIGVCDLTITQMRRSVVDFTVPFQMQLGI  
SILHYKSPPEPKNQFAFLEPFAVEVWIYMI FAQLIMTLAFVFIARLSYREWLPNPAPAIQDPDELENIWNVNSTWL  
MVGSI MQQGC DILPRGPHMRILTGMWWFFALMMLSTYTANLAAFLTSNKWQSSIKSLQDLIEQDKVHFGSMRGGST  
SLFFSESNDDTYQRAWNQMKDFNPSAFTSTNKEGVARVRKEKGGYAFLMETTSLTYNIERNCDLTQIGEQIGEKHY  
GLAVPLGSDYRTNLSVSIQLSERGELQKMKNKWWKNHNVTCDSYHEVDGDELSIIELGGVFLVLAGGVILIGVILG  
IFEFLWNVQNVAVEERVTPWQAFKAELIFALKFWVRKKPMRISSSSDKSSSRSSSGSRSSSKEKSRSKTVS

>DmelGluRIIB

MHGLQFLVLLALAIASGANEDTLVIKIGAIFFDTEMKLADAFSAALEEVNAINPALKLDAIKRYVTVDSSIVLQDI  
SCDLIGSGVAAIFGPSSKTNSDIVEVLCNMTGIPHLQFDWHPPQSNRERMNHQLTVNVAPMELFLSAAFSDILASK  
TFDWKSFTIAYERSSHLIRLQHILAWKQLHKAGIKMQEFERGGDDYRILWKRINNAREKFVLLDCPSDILVDVINAS  
IGYNMTGSFNHLFLTNLDLTHLSGIDGFYSRDFTVAVAAVRIRTYVPPPVHDEIDVFDNSVDTRFSSSLGSQLVYDSI  
VLFYNALLEISQRPFGYIPNFSCGRGFWQPGPRLVEQMKQITPKMVKPPFKTQRLQINADGQREDFNLEVNP I ID  
RVTHIWNKEFQLVDFEKLRNSTQALKQKRLQNKEDFSQKPIRYTVATRVGKPYFSWREEPEGVHYEGNERFEGYA  
VDLIYMLAQECKFDNFEPVRDNKYGSYDANTDEWDGIRQLIDNNAQIGICDLTITQARRSVVDFTVPFQMQLGIS  
ILSYKEPPPKADIYAFLNPYNAEVWLFVMIAMMITAFALIFTGRIDQYEWDPVENVNREMERQNIWHLSNALWL  
LGSMNLNQGC DILPRGLPMRLLTAFWWIFALLISQTYIAKLAAFITSSKIAGDIGSLHDLVDQNKVQFGTIRGATS  
VYFSESNDDTNRMAWNKMLSFKPDFAFTKNNEEGVDRVKLSKGTYAFLMETTNLQYYVQRNCELTQIGESFGEKHYG  
IAVPLNADFRSNLSVGI LRLSERGELFKLRNKWFNSNESTCDSNVPTIDDGQFDMDSVGGFLVVLIVGVVGLVIG  
VAEFLWHVQRISVKEKIPMLALKAEFYFVIRFWLTKPLHTYRQSRDSTSTGYSSLEQITSASSAKKKKKTRRIE  
K

>DmelClumsy

MYSLFLTHFLLIALPVLADIDRSQFMVGSIFTSDKDESEIAFRTAVDRANILERNVELVPIVYANTDDSFIMEKM  
VCNLISQVIAIFGPSTGSSSDIIASICDTLDIPHIVYDWIPNESIPDREHSTMTLNVHPDNLLLSQGLAEIVQSF  
AWRSFTVYETDKELQQQLQDILQVGEPISNPTTVKQLGPGDDHRPFLKEIKLSTDNCLILHCAPDNLLKILQQANE  
LKMLGEYQSVFIPLLDTHSIDFGELSGVEANITTVRLMDPSDFHVKNVVDHWEEREKREGRYFKVDPNRVKSQMIL  
LNDVWLFVSKGLTELGI FEELTAPDLECRKKPWPFGRKRIEFIKARSEETSTGRIDFNENGQRSFFTFRFMELNS  
DGFLDLATWDPVNGLDVLNDDEESEKRVQKLSNKTFTVSSRLGAPFLTTLREPQEGEILTNSRYEGYSIDLIN EI  
AKMLNFKFEFRMSPDGKYGALNKVTQTWDGIVRQLIDGNADLGICDLTMTSSRRQAVDFTPPFMTLGISILFSKPP  
TPPTDLFSFSLSPFSLDVWIMGSAYLFI SLLL FALARMAPDDWENPHPCKEPEEVENIWSIMNTTWSIGSLMGQG  
CDILPKAASTRLVTGMWWFFALMMLNSYTANLAAFLTNSRQANSINSAEDLAAQSKI KYGAMAGGSTMGFFRDSNF  
STYQKMWTAMESASPSVFTKTNDGVERVQKGKNLYAFLMESTTLEYNVERKCDLVQIGGWLDYKSYGIAMPFNSP  
YRKQISAAVLKLGLGQLAELKRWKEMHGGNCKESDEDDGGDTPELGLENVGGVFLVLGLGLLSAMVLGCTEFL  
WNVKSVAI EEKISLKEAFKSEALFAARIWITTKPVHTSSESGSSNSSSSSSSRSKHSFKSQGLSMKSLKSSGYQDV  
EASVHSKLKKIGSMFSLKSQKTVTPPPEIGWKLDKSTQIDVVPSTSDVDQELIPEVEPHLPHRHHHHHHHRHHHHHH  
QPDQEHDRNPSPPE

>DmelGluRIID

MHFCWISLIIILSLSRVQAQFYGGNAYEASSGQSIRLGLITDDATDRIRQTFEHAISVVNNELGVPLVGETEQVAYG  
NSVQAFAQLCRLMQSGVGAVFGPAARHTASHLLNACDSKDIPIFYPHLSWGSNPDGFNLHPSPEIDIANALYDIVNQ  
FEWSRFICYESA EYLKILDHLMTRYGIKGPVIKVMRYDLNLNGNYKSVLRRIRKSEDSRI VVGSTTGVAELLRQ  
AQQVGIMNEDYTYIIGNLNLHTFDLEEYKYSEANITGIRMFSPDQEEVRDLMEKHLHQLGSESEPVNSGSTFTMEM  
ALTYDAVRVIAETTKHLPYQPQMLNCSERHNDVQPDGSTFRNYMRSLEIKEKTTITGRIYFEGNVRKGFTFDVI ELQ  
TSGLVKVGTTWEEGKDFEFQRPQAVNFNDIDDGSLVNKTFIVLISVATKPYASLVESIDTLIGNNQFQGYGVDLIK  
ELADKLGFNFTFRDGGNDYGSFNKTTNSTSGMLKEIVEGRADLAITDLTITSEREEVIDFSIPFMNLGIAILYVKP  
QKAPPALFSFMDPFSSEVWLYLGIAYLGVSLCFFIIGRLSPIEWDNPYPCIEEPEELENQFTINNSLWFTTGALLQ  
QGSEIAPKALSTRTISAIWWFFTLIMVSSYTANLAAFLTIENPTSPINSVKDLADNKDDVQYGA KRTGSTRNFFST  
SEEPYIYIMNEYLNNAHPEMLMENNQQGVQDKVKSQTKYAFLMESTSIEFNTVRECNLTKVGPDLDEKGYGIAMVKNW  
PYRDKFNKALLELQEQGVLARLKNKWNEVGAGVCSAKSDDDGPSSELGVDNLSGIYVVLVIGSIIISIIISILCWCY  
FVYKAKNYEVPFCDALEEFRI VIRFSENERPLKSAQSIYSRSRNSSQSIESLKT DSEENMPVED

>DmelGluRIIE

MFFNHVFILWSLFSIIHISVNWAQYENFGGYDNYQSLESVP IGLLTDQNTQMNI VFDHAIDVANQEVGTSLTSLKE  
EVNYGDAYQSYGKLCRLMLETGIAGVFGPSSRHTAVHLSICDAMDIPHII SYMSENAEGFNLHPHPADLAKALYSL  
ITEFNWTRFI FLYESAEYLNILNELT TMLGKSGTVITVLRDYDMQLNGNYKQVLRVRKSVDNRI VVGSSSETMPEF  
LNQAQQVGI INEDYKYIIGNLDFHSFDLEEYKYSEANITGLRLFSPEKMAVKELLMKLGYP TDQDEFRNGSCPITV  
EMALTYDAVQLFAQTLKNLPFKPMPQNCQSQRTE SVRDDGSSFKNYMRTLRLTDRLLTGPIYFEGNVRKGYHLDVIE  
LQPSGIVKVGTTWEDDRQYRPQRLAPTQAQFDSVDNSLANKTFI ILLSVPNKPYAQLVET YKQLEGN SQYEGYGVDL  
IKELADKLGFNFTFVNGNDYGSYNKSTNESTGMLREIMTGRADLAITDLTITSEREQALDFTIPFMNLGIAILYL  
KPQKATPELFTFMDPFSEEVWWFLGFSFLGVLSFFILGR LSPSEWDNPYPCIEEPEELENQFTLGNSIWFTTGAL  
LQQGSEIGPKALSTRTVASFWWFFTLIVSSYTANLAAFLTIEKPQSLINSVDDLADNKDGVVYGAKKTGSTRNFF  
MTSAEERYKKMNKFMSENPQYLTEDNMEGVNRVKTNTHYAFLMESTSIEYNTKRECNLKKIGDALDEKGYGIAMRK  
DWPHRGKFNNALLELQEQGVLEKMKKNWNEVG TGICATKEDAPDATPLDMNLEGVFFVLLVGSCALLYGII SW

VL FVMKKAHHYRVPLRDALKEEFQFVIDFN NYVRVLKNSASIYSRSRQSSMSVASVAQESQ  
>Dme1CG3822  
MRSSGVLVLPLLLLQLILNCRKAQSLPDI I KIGGLFHPADDHQELAFRQAVDRINADRSILPRSKLVAQIERISPF  
DSFHAGKRVCGLLNIGVAAIFGPQSSHTASHVQSI CDNMEI PHLENRWDRYLRRESCLVNLYPHPNTLSKAYVDIV  
RHWGKTFFTI IYENNDGIVRLQELLKAHGMTFPFITVRQLSDSGDYRPLLKQIKNSAEAHIVLDCSTERIHEVLKQ  
AQQIGMMSDYHSYLVTSLDLHTVNLDEFYRGGTNITGFRLINEKIVSDVVRQWSIDEKGLLRSANLTTVRSETALM  
YDAVHLFAKALHDLDSQQIDIHPISCDGQSTWQHGFSLINYMKIVEMKGLTNVIKFDHQGFRTDFMLDIVELTPA  
GIRKIGTWNSTLPDGINFTRTFSQKQOEIEANLKNKTLVVTILSNPYCMRKESAIPLSGNDQFEGYAVDLIHEIS  
KSLGFNYKIQLVDPDGSYGSNLKLTGEWNGMIRELLEQRADLAIADLTITFEREQAVDFTTTPFMNLGVSILYRKPIK  
QPPNLF SFLSPLSLDVWIYMATAYLGVSVLLFILAKFTPYEWPAYTDAHGEKVESQFTLLNCMWFAIGSLMQQGC  
FLPKALSTRMVAGIWWFFTLIMISSYTANLAAFLTVERMDSPIESAEDLAKQTRIKYGALKGGSTAFAFFRDSKIST  
YQRMWSFMESARPSVFTASNGEGVERVAKGKGSYAFLMESTSIEYVTERNCELTQVGGMLDTKSYGIATPPNSPYR  
TAINSVILKLQEEGKLHLIKTKWWKEKRGGKCRVETSKSSSAANELGLANVGGVFVVLMMGMGVACVIAVCEFW  
KSRKVAVEERLSAILNE  
>Dme1CG5621  
MISTEASFPLGFILTSLLAFPGCRGERTNVGLVYENTDPDLEKIFHLAISKANEENEDLQLHGVSVSIEPGNSFE  
TSKKLCKMLRQNLVAVFGPTSNLAA RHAMSI CDAKELPFLDTRWDFGAQLPTINLHHPATLGVALRDMVVALGWE  
SFTI IYESGEYLPPTVRELLQMYGTAGPTVTVRRYELDLNGYRNVLRRIRNADDFSFVVVGSMATLPEFFKQAOV  
GLVTS DYRYIIGNLDWHTMDLEPYQHAGTNITGLRLVSPDSEQVQEVAKALYESEEPFQNVSCPLTNSMALVYDGV  
QLLAETYKHVNFRPVALSCNDDSAWDKGYTLVNYMKS LTLNGLTGPIRFDYEGLRTDFKLEVI ELAVSGMQKIGQW  
SGEDGFQENRPAPAHSLPEDMRSLVNKS FVVITAI SEPYGMLKETSEKLEGNDFEGFGIELIDELSKKLGF SYTW  
RLQEDNKYGGIDPKTGEWNGMLREIIDS RADMGITDLTMTSERESGVDF TIPFMSLGIGILFRKPMKEPPKLF SFM  
SPFSGEVWLWLGLAYMGVSI SMFVLGRLS PAEWDNPPYPCIEEPTELNQFSFANCLWFSIGALLOQGS ELAPKAYS  
TRAVAASWWFFTLILVSSYTANLAAFLTVESLVTPI NADADDLSKNKGGVNYGAKIGGATFNFFKESNYPTYQRMYE  
FMRDNPQYMTNTNQEGVDRVENSNYAFLMESTTIEYITERRCTLTQVGALLDEKGYGIAMRKNWYPYRDTLSQAVLE  
MQEQGLLT KMKTKWWQEKRGGGACSDADEDSGA VALEISNLGGVFLVMGVGSFFGIFVSLLEMVLGVKERSDENQE  
APDSDASSLG FANLGGVYLVMFVGS CFGSIYGLVNCVSVYLRARENKVSFKTELLDEIRFILQCSGNTKAVKYPK  
NSSRSNASSKSKGSSMSVDSLPEDTSEADASGKH NHGKK  
>Dme1CG9935  
MLIASGFLLFQFLSYGLGVPLVRIGAI FSNQPGMYNSELAFRYAIHRLNMDKSLLPETTVDY YVEYVNRDFS FET  
VQKVCKLIRVGVA VFSPTDSVLATHINSICDALDIPNIGRSAHDFSIN VYPSKQLVNYAFNDVIQYLNWTRFGIL  
HEKENG IINLHQLSRSFHGEVHMRQVSRDSYVSALNEFKGEIHNI I IDTNSNGISILLKNILQQQMNEYKYHYLF  
TSFDLETYDLED FKYNFVNITSFRLVDTADVGVKQILKD IGLYSHHIFKKPYLNLHIK KSTILESEPALMFDSVYV  
FAIGLQTLTEQSHSLTLLNISCEEENSWD GGLSLINYLNAVEWKGLTGPIQFKDGQRVQFKLDLIK LKQHSIVKVGE  
WTPHGH LNI TEPSMFFDAGSMNVTLVVTITILETPYVMHYGKNFTGNERNFYGFCVDI LETISREVGF DYI LDLPD  
RKYGAKDPETGEWNGMVAQLMKYKADLAVGSMTITYARESVIDFTKPFMNLGISILFKVPTSEPTRLFSFMNPLAI  
EIWIYVLIA YFLVSLCIYIVGKLSPIEWCINACDLENISIGNQFSLTDSFWFTIGTFMQQSPDIYPRAMSTRIIS  
TWGFFSLIIVASYTANLAAFLTTERMINPIENAEDLASQTEISYGTLD SGSTM TFFRDSYMETYKKIWRSMDNKK  
PSAFTTTYEDGIKRVNQGYAFLMESTMLDYIVQRDCNL TQIGGLLDTKGYGIATPKGSPWRDKISLAILELQERG  
DIQMLYDKWWKNTDETCTRKN TSKQSKANSLGLESIGGVFVVL IAGIIVA AVVAFFEFWYNFRYNYEATPSQSVVN  
NKYNQD GILSE RNYTPPDRSFWIEIAEELRYASWC MNKQKRPALTRTCSKCTIPKGQRINKL  
>Dme1CG11155  
MVRKKREIVIKENIQGRSYLKKICCSYIILSILVISNALPPVIRVGAI FTEDERESSIESAFKYAIYRINKEKTL  
AYVDVINTADAFKLSRLICNQFSRGVYSMLGAVSPDSFDTLHSYSNTFQMPFVTPWFPEKVLAPSSGLLDFAISMR  
PDYHQAI IDTIQYYGWQSI IYLYDSHDGLLR LQQIYQELKPGNETFRVQMVKRIANVTMAIEFLHTLEDLGRFSKK  
RIVLDCPAEMAKEIIVQHVRDIKLGRRTYHYLLSGLVMDNHWP SDVVEFGAINITGFRI VDSNRRRAVRDFHDSRKR  
LEPSGQSQSQNAGGPNSLP AISAQAA LMYDAVFVLVEAFNRILRKKPDQFRSNHLQRRSHGSSSSSSATGTNESSA  
LLDCNTSKGWVTPWEQGEKISRVL RKVEIDGLSGEIRFDEDGRRIN YTLHV VEMSVNSTLQQVAEWRDDAGLLPLH  
SHNYASSRSASASTGDYDRNHTYIVSSLLEEPYLSLKQYTYGESLVGNDRFEGYCKDLADMLAAQLGIKYEIRLV  
QDNGYGAENQYAPGGWDMVGELIRKEADIAISAMTITAERERVIDFSKPFMTLGISIMIKKPVKQTPGVFSFLNP  
LSQEIWISVILSYGVSVFLYFVTRFPPEYEWRIVRPQADSTAQQPPGIIGGATLSEPQAHVPPVPQNEFTMLNSF  
WYSLAAFMQQGC DITPPSIAGRIAAAVWFFFTIILISSYTANLAAFLTVERMVAPIKTPEDLTMQTDVNYGTL LYG  
STWEFFRRSQIGLHNKMW EYMNANQHHSVHTYDEGIRRVQRSGKGYALLVESPKNEYVNARPPCDTMKVGRNIDTK  
GFGVATPIGSPLRKRLNEAVLTLKENGELLRIRNKWWFDKTECNLDQETSTPNELSLSNVAGIYYIILIGLLLAVI  
VAIMEFFCRNKTPQLKSPGSNGSAGGVPGMLASSTYQRDSLSDAIMHSQAKLAMQASSEYDERLVGVELASNVR YQ

YSM

>DmelGlu-R1B

MRFGLKLSCLWPSFLLWLTWSSGGGGSGVGVSAQPSLTEKIPLGAI FEQGTDEVQS AFKYAMLNHNLN VSSRRFE  
LQAYVDVINTADAFKLSRLICNQFSRGVYSMLGAVSPDSFDTLHSYSNTFQMPFVTPWFPEKVLTPSSGFLDFALS  
MRPDYHQAI IDTIQFYGWRKI IYLYDSHDGLRLQOIYQGLRPGNESFQVELVKRISNVSMAI EFLHTEQIGRFE  
NKHIVLDCPTEMAKQILIQHVRDLRLGRRTYHYLLSGLVMDRWESEIIEFGAINITGFRIVDTNRRLLVREFYDSW  
KRLDPQMSVGAGRESISAQAALMYDAVFVLVEAFNKILRKKPDQFRNNVQRRSOTLMVAQAAASTSSDGYNYSASG  
GGGGNGGAGGGFAGSDSGSGGSMASRALDCNTAKGWVNAWEHGDKISR YLRKVEIEGLTGDIKFND DGRRVNYTLH  
VVEMTVNSAMVKVAEWND DAGLQPLNAKYVRLRPHVEFEKNRTYIVTTVLEEPYIMLKQVAFGEKHLHGNNRFEGYC  
KDLADLLAKELGINYELRLVKDGNYGSEKSSAHGGWDMVGELVRKEADIAIAAMTITAERERVIDFSKPFMSLGI  
SIMIKKPVKQTPGVFSFMNPLSQEIWVSVIFSYIGVSVILFFVSRFSPHEWRLVQQPQQSQSPDPHAHHEQLANQ  
QPPGIIIGGAPLPAPPGPPTPGAQTAAGAAALQAALSAGSPGSGGSSAVVNEFSVWNSFWFSLAAFMQQGCDLSPR  
SVSGRIAAASWFFFTLILISSYTANLAAFLTVERMVTPINSPEDLAMQTEVQYGTLLHGSTWDFFRRSQIGLHNKM  
WEYMNSRKHVFPVPTYDEGIKVRNSKGYALLVESPKNEYVNAREPCDTMKVGRNLDTKGFGIATPLGSALKDPIN  
LAVLTLKENGELIKLRNKWWEKAECSTHKDGETSHSEL SLSNVAGIFYILIGLLVSVFVAILEYCFRSRDSRSA  
SSGSGMGLGMGLGGGMSGGSLGKANGSMMLGPSSAVPGGMPSSHQRSTLTDTMHAKAKLTIQASRDYDNGRVGYLN  
CASLQYYPQAQLSATPPDAGDSLHMNAHGQV

>DmelNmdar2

MMPSRVKLKRGTDGPTPTPTMPMTMRKHPTIATLNTASCQHNSTTSRRKRILTPPSGPISLLLLTVLTLILIDTR  
SCQGLRLTNGGSLSKGAAANKEQLNIGLIAPHTNFGKREYLR SINNAV TGLTKTRGAKLTF LKDYSFEQNIHFD  
MMSLTPTAILSTLCKEFLRVNVSAI LYMMNNEQFGHSTASAQYFLQLAGYLGIPVISWNADNSGLERRASQSTL  
QLQLAPSI EHQSAAMLSILERYKWHQFSVVT SQIAGHDFVQAVRERVAEMQEHFKFTILNSIVVTRTSDLMELVN  
SEARVMLLYATQTEAITILRAAEEMKLTGENYVWVVSQSVIEKKDAHSQFPVGMLGVHFDTS SAALMNEISNAIKI  
YSYGEAYLTDPANRDRRLTTQSLSCEDEGRGRWDNGEIFFKYLRNVSIEGDLNKPNI EFTADGDLRS AELKIMNL  
RPSANNKNLVWEEIGVWKSWEQKLDIRDIAPGNSHAPPQGVPEKFHLKITFLEEAPYINLSPADPVS GKCLMDR  
GVLCRVAADHEMAADIDVGQAHRNESFYQCCSGFCIDLLEKFAEELGFTYELVRVEDGKWGTLENGKWNGLIADLV  
NRKTDMLVLTSLMINTEREAVVDFSEPFMETGIAIVVAKRTGII SPTAFLEPFD TASWMLVGIVAIQAATFMI FLFE  
WLSPSGYDMKLYLQNTNVT PYRFSLFRTYWLWAVLFQAAVHVDSPRGFTSRFMTNVWALFAVVFLAIY TANLAAF  
MITREEFHEFSGLNDSRLVHPF SHKPSFKFGTIPYSHTDSTIHKYFNMVHNYMRQYNKTSVADGVA AVLNGNLD SF  
IYDGTVDLDYLAQDED CRLMTVGSWYAMTGYGLAFSRNSKYVQMFNKRLL EFRANGDLERLRRYWMGTGTCRPGKQE  
HKSSDPLALEQFLSAFLLLMAGILLAALLLLLLEHVYFKYIRKRLAKKDGGHCCALISLSMGKSLTFRGAVFEATEI  
LKKHRCNDPICDTHLWKVKHELDMSRLRVRQLEKVM DKHGIKAPQLRLASSSDLLNHHHLKERPPLLGNLSLAASA  
QDLRWSYKTEIAEMETVL

>DmelNmdar1

MAMAEFVFCRPLFGLAIVLLVAPIDAAQRHTASDNPSTYNIGGVLSNSDSEEHFSTTIKHLNFDQQYVPRKVTTYD  
KTIRMDKNPIKTVFNVC DKLIENRVYAVVVSHEQTS GDLSPAAVSYTS GFYSIPVIGISSRDAAFSDKNIHVSFLR  
TVPPYYHQADVWLEMLSHFAYTKVIIHSSD TDGRAILGRFQTTSQTYDDVDVRATVELI VEFEPKLESFTEHLI  
DMKTAQSRVYLMYASTEDAQVIFRDAGEYNMTGEGHVWIVTEQALFSNNTPDGVLGLQLEHAHSDKGHIRDSVYVL  
ASAIKEMISNETIAEAPKDCGDSAVNWESGKRLFQYLSRNITGETGQVAFDDNGDRIYAGYDVINIREQQKKHV  
GKFSYDSMRAKMRMRINDSEI IWPGKQRRKPEGIMIP THLRLLTIEEKP FVYVRRMGDDEFRC EPDERPCPLFNNS  
DATANEFCCRGCIDLLIELSKRINF TYDLALSPDGQGHYILRNNTGAMTLRKEWTGLIGELVNERADMI VAPLT  
INPERAEYIEFSKPFKYQGITILEKKPSRSSTLV SFLQPF SNTLWILVMVSVHVVALVLYLLDRFSPFGRFKLSHS  
DSNEEKALNLSSAVWFANGVLLNSGIGEGT PRSFSARVLGMVWAGFAMIIVASYTANLAAFLVLERPKTKLSGIND  
ARLNTMENLTCA TVKGSSVDMYFRQVELSNMYRTMEANNYATAEQAIQDVKKGKLMAFIWDSSRLEYEASKDCE  
LVTAGELFGRSGYGIGLQKGPWTD AVTLAILEFHESGFMEKLDKQWIFHGHVQQNCELFEKTPNTLGLKNMAGVF  
ILVGVIAGGVGLIIIEVIYKKHQVKKQKRLDIARHAADKWRGTIEKRKTIRASLAMQRQYNVGLNSTHAPGTISL  
AVDKRRYPRLGQRLGPERAWPGDAADVLRIRRPYELGNPGQSPKVMANQPGMPMPMLGKTRPQQSVLP PPRYSPGY  
TSDVSHLVV

>DmelIR8a

MELPLLVLALLALRFAGSEVLKITFWIEPVQRAEFDTDIAMVLKELDALRLDVKVDDTTLTLTRSEDGLDMQRFCEI  
LSTVGASAVIDLTYSHWEEGYNLVRSLGIGYVRLERIMRPFLDMFGDFMRQKRANNVAMVFMNARDAVEAMQOMLV  
GYPFRTLIMDASQTDPGQHFLERIRSLRPAPTYIALFARAAAMNGIFEKVQKADLFQRPLEWHFVFLDTRDRVFKY  
RRQAELECTRFTLNPRACRSMPPMDLYCGSGFTMQRAMLLNVLRLSLINAAQVSPGYPLAIYQDCNATASSEVSDP  
LEKDDYNWLDMVHWSNFLAYAPPLPHIQDQFQSPVPGLTFAVNI SAGYYSEHEAKTDLAAWSV GEMRLNETIS  
PARRFFRIGTAESIPWSYLRREEGTGELIRDRSGLPIWEGYCIDFIIRLSQKLNFEFEI VAVEVGHMGELNELGEW  
DGVVGD LVRGETDFAIAALKMYSEREEVIDFLPPYYEQTGISIAIRKPVRRTSLSFKFMTVLRLEVWLSIVAALVGT  
AIMIWFMDKYSPYSSRNRRQAYPYACREFTLRESFWFALT SFTPQGGGEAPKAISGRMLVAAYWLFVVLMLATFTA  
NLAAFLTVERMQTPVQSLEQLARQSRINYTVVKDS DTHQYFVNMMKFAEDTLYRMWKELALNASKDFKKFR1WDYPI  
KEQYGHILLAINSSQPVADAKEGFANVDAHENADYAFIHDSAEIKYEITRNCNLTEVGEVF AEQPYAVAVQQGSHL  
GDELSYAIL ELQKDRFFEELKAKYWNQSNLPNCPLSEDQEGITLES LGGVFIATLFGVLAMMTLGMEVLYYKKKQ  
NALEITQVRPVNDSSGSGNSSTAPPTATSTTKQAWHIPVLEAE EKPAKVSPPPSFETATFRGKKL PARTLGDGK  
FKPRHGLYARRNLGASDSHSGYME

>DmelIR25a

MILMNPKTSKILWLLGFLSLLSSFSLEIAAQTTQNNINVL FINEVDNEPAAKAVEVVLTYLKKNIRYGLSVQLDSIE  
ANKSDAKVLLEAICNKYATSIEKKQTPHLILDTTKSGIASETVKSFTQALGLPTISASYGQQGDLRQWRDLDEAKQ  
KYL LQVMPPADI IPEAIRSIVIHMNITNAAI LYDDSFVMDHKYKSL LQNIQTRHVITAI AKDGKREREEQIEKLRN  
LDINNFFILGTLQSIRMVLESVKPAYFERNFAWHAITQNEGEISSQRDNATIMFMKPMAYTQYRDLGLLRTTYNL  
NEEPQLSSAFYFDLALRSFLTIKEMLQSGAWPKDMEYLN CDDFQGGNTPQRNLDRDYFTKITEPTS YGTFDLVTO

STQPFNGHSFMKFEMDINVLIQIRGGSSVNSKSIGKWIISGLNSELIVKDEEQMKNLTADTVYRIFTVVQAPFIMRDE  
TAPKGYKGYCIDLINEIAAIVHFDYTIQEVEDGKFGNMDENGQWNGIVKKLMDKQADIGLGSMSSVMAEREIVIDFT  
VPYYDLVGITIMMQRSSPSSLFKFLTIVLETNVWLCILAAAYFFTSFLMWIFDRWSPYSYQNNREKYKDDEEKREFN  
LKECLWFCMTSLTPQGGEAPKNLSGRIVAATWWLFGFIIIASYTANLAAFLTVSRLDTPVESLDDLAKQYKILYA  
PLNGSSAMTYFERMSNIEQMFIYIWKDLSLNDSLTAVERSKLAVWDYPVSDKYTKMWQAMQEAKLPA TLDEAVARV  
RNSTAATGFAFLGDATDIRYLQLTNCDLQVVGEEFSRKPYAIAVQQGSHLKDQFNNAITLLNKRQLEKLEKWWK  
NDEALAKCDKPEDQSDGISIQNIGGVFIVIFVGIGMACITLVFEYWWYRYRKNPRIIDVAEANAERSNAADHPGKL  
VDGVILGHSGEKFEKSKAALRPRFNQYPATFKPRF

>DmelIR21a

MSYYWVALVLFATAQAFSIEGDRSASYQEKICISRRLINHYQLNKEIFGVGMCDGNNENEFQRKRRIVPTFGQNP RPR  
GELLASKFHVNSYNFEQTNLSLVGLVNKIAQEYLNKCPPIYYDSFVEKSDGLILENLFKTIPITFYHGEINADYEA  
KNKRFTSHIDCNCKSYILFLSDPLMTRKILGPQTESRVVLVSRSTQWRRLRDFLSSELSSNIVNLLVIGESLMADPM  
RERPVLVLYTHKLYADGLGSNTPVVLT SWIKGALS RPHINLFP SKFQFGFAGHRFQISAANQPPFIFRIRTL DSSGM  
GQLRWDGVEFRLLTMISKRLNFSIDITETPTRSNTRGVVDTIQEQUIERTVDIGMSGIYITQERLMSAMS VGHSP  
DCAAFITLASKALPKYRAIMGPFQWPVWVALICVYLGGIFFIVFTDRLTSLHLMGNWGEVENMFYVFGMFTNAFS  
FTGKYSWSNTRKNSTRLLIGAYWLFITIIITSCYTGSIIAFVTLPAFPDPTVDSVLDLLGLFFRVGTLNNGGWETWFQ  
NSTHIPTSRLYKKMEFVGSVDEGIGNVTQSFFWNAYFLGSKAQLEYLVQSNFSDENISRRSALHLSEECFALFQIG  
FLFPRESVYKIKIDSMILLAQQSGLIAKINNEVSWVMQRSSSGRLLQASSSNSLREIQEERQLTTADTEGMFLLM  
ALGYFLGATALVSEIVGGITNKRQIIKRSRKSAASSWSSASSGSMRLTNAEQLSHDKRKANRREAAEVAQKMSFG  
MRELNLTRATLREIYGSYGAPETDHGQLDIVHTEFPNSSAKLNNIEDEESREALESQRLDEFMDQMDNDGNPSSH  
TFRI

DN

>DmelIR31a

MNLLISMFILILAAGEGEIIPSMEE SVVTNFVKS LVKTKQAI VFSC LFKDFKEISLALMRINQFVSVVN LNQSYSL  
TSILTREN YARTSV MVNARCSGSSELLFEASENRYFNKTYQWFLWGV DLEVQSLFPLNLNYVGPNAQITYVNETAD  
GYAYWDIHSKGRHLKSNLEINLIATLINDTLNIARDIFHLQSIDFRGQFNGLTLRGASVIDKEDIISNEQIESILS  
RPTKDAGVAAFIKYHYELLGLLRERFNFTVNFRNSRGWAGRLGNTTFRLLGLGIVMRNEADIAASGAFNRINRFAE  
FDTIHQSWKFETAFLYRYTSDLDTHGKSGNFLSPFSDRVWLFCLLTLGAFSIIWVLFEIIDYKILRIRVNSQKLEH  
LNQKSSVICIKTTCIERILQTFGACCQQGLDPNPVDRSVRFLVMTLFLFLSLVMYNYTSSVVGGLSSSDQGPSTV  
DEITASPLKISFEDIGYKVLFRSQNRSITRLIEKKLSSSRSLNELPIFSHIEDAVPYLKAGGF AFHCEVVDAYP  
VISEYFDANEICDLREVSGLMEVEILNWLHKNQSYTEIFKTAMCNAQEKGFVERILRRRQIKKPACQSLYTVYPV  
SLSGVLPGFVILICKSINKFS

>DmelIR40a

MHKFLALGLLPYLLGLLNSTRLTFIGNDESDTAIALTQIVRGLQQSSLAIALALPSLALSDGVCQKERNVYLD DFLQ  
RLHRSNYKSVVFSQTELEFFQHI EENLQGANECISLILDEPNQLLNSLHDRHLGHRLSLFIFYWGARWPPSSRVIRF  
REPLRVVVVTRPRKKA FRIYYNQARPCSDSQLQLVNWYDGDNLGLQRIPLLP TALSVYANFKGRTERFVPV FHSPPW  
FWVITYCNNSFEED EEFNSLDSIEKRKVRVTGGRDHRLMLLSKHMNFRFKYIEAPGR TQGS MRSEDGKDSNDSFTG  
GIGLLSQSQADFFLGDVGLSWERRKAIEFSFFTLADSGAFATHAPRRLNEALAIMRPFQDIWPHLILTIIFSGP  
IFYGIIALPYIWRRRWANS DVEHLGELYIHMTYLKEITPRLLKLKPRTVLSAHQMPHQLFQKCIWFTLRLFLKQSC  
NELHNGYRAKFLTIVYWIAATYVLADVSAQLTSQFARPAREPPINTLQRLQAAMIHDGYRLYVEKESSSLEMLEN  
GTLEFRQLYALMRQQVINDPQGFFIDSVEAGIKLIAEGGEDKAVLGGRETLFFNVQYGSNNFQLSQKLYTRYSAV  
AVQIGCPFLGSLNNVLMQLFESGILDKMTAAEYAKQYQEVEATRIYKGSVQAKNSEAYSRTESYDSTVISPLNLRM  
LQGA FIALGVGSLAAAAALNNTINVRSLNSRDKFICGGPVKIWYYLVLLWYFFNRGLVGIYQLWHKTSIRNTGKGM  
PFLGE

>DmelIR64a

MHWLLVFLPLSCQGLPEHELLELELDYGLAEPQRTSL LQSS LILQFSQDYKHI PRITYFTCQKPHLQTPNQIPNA  
AEHRDAFAAKNFQLIKSLYESELFVRIVLLDVLAQSPTSGRPNRPGNGPTGGFSQTPSQAQSNSEWLEGVLRMEAL  
RQIAVVDLACGAVSRRFLELASAKMLYSEKFHWLLIEDFAWHGRTQTAE GSGKRDDGEME EEPGQQIQATDDDED  
LPSIESFLGGMNLYMNTETLAKRMSEAAHYTLFDVWN PGLNYGGHVNLTEIGSFTPTEGIQLHTWFRTTSTVRRR  
MDMQHARVRCMVVVTNKNMTGTLMYYLTHTMSGHIDTMNRFNFNLLMAVRDMFNWTFVL SRTTSWGYVKNGRFDGM  
IGALIRNETDIGGAPIFYWLERHKWIDVAGRSWSSRPCFIFRHRSTQKDRIVFLQPFTNDVWILIVGCGVLT VFI  
LWFLT TIEWKLVPHDGSALIKPKGGAPPRHHYQQQQQQEQVEAPVRPITAVSVVVSKEKVEEKQEEYEDSTPIDAG  
TLWQRCYQKLNKYIKDRKAKQKKAPERVGLFLESVLFVVGIIICQQLGFSTSFVSGRCIVITSLLSFCIYQFYSA  
SIVGTLLMEKPKTIKTLSDLVHSSLKVG MEDILYNRDYFLHTKDPVSMELYAKKITSVPTTKENEADEDEPVDNP  
VSTDPAKSYRDIVHSHE TGAHAKDNAASNWLDPETGLLRVKHERFAFHVDVAAAYKIIAETFSEQDICDLTEVSMF  
PPQKTVSIMQKNSPMRKVISYGLRRVTETGILTYHFNVHWSRKPPCKKIETSDLHVDMDTVSSALLIL LFSYAIT  
LMILGTEILYSKWHNRIQLKWVGAT

>DmelIR75a

MLVQLANFVLDNLVQSRIGFIVLFHCWQSD ESKFAQQFMKPIHPILVYHQFVQMRGVLNWSHLELSYMGHTQPT  
LAIYVDIKCDQTQDLL EASREQIYNQHYHWLLVGNQSKLEFYDLFGLFNISIDADVSYVKEQIQDNND SVAYAVH  
DVYNNGKIIGGQLNVTGSHEMS CDPFVCRTRHLSSLQKRSKYGNREQLTDVVLRVATVV TQRPLTSLDDELIRFL  
SQENDTHIDSLARFGFHLTLILRDL LHCKMKFIFSDSWSKSDVVGSGSVGAVVDQTADLTATPSLATEGR LKYL SAI  
IETGFFRSVCIFRTPHNAGLRGDVFLQPFSPLVWYLFGGVLSLIGVLLWITFYMECKRMQKRWRLDYLP SLLSTFL  
ISFGAACIQSSSLIPRSAGGRLIYFALFLISFIMYNYT SVVVSSLLSSPVKSKIKTMRQLAESSLTVGLEPLPFT  
KSYL NYSRLPEIHLFIKRKIESQTQNP ELWLP AEQGVLRVRDNP GYVYVFETSSGYAYVERYFTAQ EICDLNEVLF  
RPEQLFYTHLRNSTYKELFRLRFLRILETGVYRKQRSYVWHMKLHCVAQN FVITVGMEYVAPLLMLICADILVV  
VILLVELAWKRFFTRHLTFHP

>DmelIR75b

MNFSVLESHFKEAQIFVDADVITYVTHDPFSKNFLLYDVYNKGRQLGGELNITADREIFCNKTNCRVERYLSELYTR  
SALQHRKSFTGLTMRATAVVTTALPLNVSIKEIFDFMNSKYRIQLDITYARLGYPQARQPLRMDLDCFKYIFRDRWSD  
GNATGGMIGDLILDKADLAIAPFIYSFDRALFLQPITKFSVFREICMFRNPRSVSAGLSATEFLQPFSGGVWLTFA  
LLLLLAGCLLWVTFILERRKQWKPSLLTSCLLSFGAGCIQGAWLTPRSMGGRMAFFALMVTSYLMYNYTTSIVVSK  
LLGQPIKSNIRTLQQLADSNLDVGIEPTVYTRIYVETSEEPDVRDLYRKKVLGSKRSPDKIWIPTAGVLSVRDQE  
GFVYITGVATGYEFVRKHFLAHQICELNEIPLRDASHHTVLAKRSPYAELIKLSELRLMETGVHFKHERSWMETK  
LHCYQHNHTVAVGLEYAAPLFIILLGAILCMGILGLEVIWHRHCTLH

>DmelIR75c

MTSWPLYRLIVFNLLLEINLSNLMVFHCWSIKEAFPLVEMLNQNGIFSQYIDVQNPNDLANVHKEYLSDLVSLNAD  
VTYVSREDEERFILHDVYNKGSHLGGKLNITVDQTLQCNRSHCQVKEYLSELHLRPRLQHRMDLSSVTFRLAALVS  
VLPINSSEEELEFLNSDRDSDHMDSISRIGNRLIMHTQEIILGFNVQDAFGGAIGMLTNESAECLCTTPFVPSWNRLH  
YLHPMTEQAQFRAVCMFRTPHNAGIKAAVFLEPFMPSPVWFAGALLIFAGVLLWMI FHLERHWMQRCDFIPSLLS  
SCLISFGAACIQGSYLMPKSAGGRLAFIAVMLTSFLMYNYTTSIVVSTLLGSPVRSNIRTIQQLADSSLDVGFDTV  
PFTKTYLVSSPRPDIRS LYKQKVESKRDPN SVWLSPEEGVIRVRDQPGFVYTSEASFMYHFVEKHYLPREISDLNE  
IILRPESAVYGMVHLNSTYRQLLTQLQVRMLETGITSQSRFFSKTKLHTFSNSFVIQVGM EYAAPLFIISLLVAYF  
LALLILILEICWARYAKKKFSTIIPQNQ

>DmelIR75d

MKVQVAHWLPLIFFLLVSGTPRVAGSWRSEYSRQDPDPKTRWGNQLPDMLVAYYRHHGVHSLMLVVCHTDIADFRL  
WKLWQHFNLN NFVYQVSTESSLRDLQHVDALDEHKDAPPPKS FHANNSTHWETS FLLPALPYKMGILLLEFSSECA  
LNL LRWSAASEHNYFTTNRFWLLLTEDPGDIDLLEDPEIFIPDSELRLHYENVGNFSCSLIDLYKVAAWKPLKR  
TLVGHNIRNSRHVIHALQHFGSAITYRQDLEGIVFNSAIVIAFPDLFTNIEDLSLRHIDTISKVNHRMLLELANRL  
NMSYNTYQTVNYGWRQPNGSFDGLMGRFQRYELDLAQLAIFMRDLRIALVDFVAETRYVRAGIMFRQPPLSAVANI  
FAMPFENDVWVSI LMLLIITTVVLVLELFFSPHNHDMSYMDTLNFVWGAMCQQGFYVEVRNRSARIIVFTTFVAAL  
FLFTSFSANIVALLQSPSDAIQSLSDLGQSPLEIGVQDTQYNKIYFTESTDPVTKNLYHKKIASKGENIYMRPLLG  
MEKMRITGLFAYQVELQAGYQIVSDTFSEPEKCGLMELEPPQLPMLAIPTRKNFPYKELIRRLRWQREVSVLNREE  
RKWIPOKPKCEGGVGGFVSIGITECRYALGIFGCGAAVSFVLFLFEFIFRHFQVYRIIKGYREVQR

>DmelIR76a

MENLLVESYFFSTVLSFFAQQFFADSHATCIFWHPAFDFRLETVHPMPLIIMDWHRWANRSDQDVYDYKIKEDEFE  
GKGIPYNDWTLRLTVAIERSHCETFIAFQEQIPEFARYFYHASIYSIWRSLRNRFMFVYTKEFEDKKDSYLSGYIF  
QDQPNILVITSQYLNSTFEIKTNRFVGRPNFNKNPEVEFYILQRFDAKGTKATWETQSAMSSKMRNLKGREVV  
GIDFYDKPFMLLDYEKPPLYYDRFMNTTDTVITDGTDIQMLMIFCELYNCTIQVDTSEPYDWGDIYLNASGYGLVGM  
LDRNDYGVGGMYLWYEAIEYMDMTHFLGRSGVTCLVPAPNRLISWTLLLRPFQFVLWMCVMLCLLLESALGITR  
RWEHSSVAAGNSWISSLRFGCISTLKL FVNQSTNYVTSSYALRTVLVASYMIDIILTTVYSGGLAAIILTPLEEA  
ADSRQRLFDHKL IWTGTSQAWITTIDERSADPVLLGLMEHYRVYDANLISAFSHTEQMGFVVERLQFGHLGNTELI  
ENDALKRLKLMVDDIYFAFTVAFVPRLWPHLNAYNDFILAWHSSGFDKFWEWKIAAEYMNHRQNRIVASEKTNLD  
IGPVKL GIDNFIGLILLWCFGMICSLLTFLGELWRGQG

>DmelIR76b

MATGIELLVAAALCVACPLNDSPTNLIQMGENGTLSPVTELPMDDVDASEAGFDADAPVETLETINRKKPKLREM  
LDWIGGKHLRIATLEDFPLSYTEVLENGTRVGHVGSFQIIDFLKKKFNFYEVVVPQDNIIGSPSDFDRSLIEMVN  
SSTVDLAAAFIPSLSDQRSFVYYSTTTLDEGEWIMVMQRPRESASGSGLLAPFEFWVWILILVSLLAGVPIIYALI  
ILRNRLTGDGQQTTPSYLGHC AWFVYGALMKQGSTLSPIADSTRLLFATWWIFITILTSFYTANLTAFLTL SKFTLP  
YNTVNDILTKNKHVFSMRGGGVEYAIRTTNESLSMLNRMIQNNYAVFSDETNDTYNLQNYVEKNGYVFVRDRPAIN  
IMLYRDYLYRKTVSFDEKVHCPFAMAKEPFLKKKRTFAYPIGSNLSQLFDEPLLHLVESGIVKHL SKRNLP SAEI  
CPQDLGGTERQLRNGDLMMTYYIMLAGFATALAVFSTELMFRYVNSRQEANKWARHGIGRTPNGQSVAPSRWLGRW  
RRLNSGHGQLLGASTHGQNVTPPPYQSI FNGGSHGDPLNRWRRPLANGNALGNGLVLLGGSEGGVRRLLINGRDYM  
VFRNPNGSQSLVPVRSPSAALFQYSYTE

>DmelIR84a

MIKLQVKVISWPLIILTAFLRVLQIESINTNFLELA AFEDFLRSEHLSHVLVVRGDDADGDWKIECHQKLLANYRV  
QFYRPEMSANFEDLMFYGSPRTAVLVLNSEHVLVRRQVFGVASEAGYFNNSLAWFILGSGRESLPVEQLIDQLLSG  
YRMGIDADITVALRGPDNASMLFYDVYRISRQANTPLIEKKGLWTHSGGYQKFGNFKNTWVIRRRNFLNVTLIGS  
TVLTEKPPGFGDMEYLADDKQLQLDPMQRKTYQLFQLVERMFNLSLAISLTDKWGELLNNGSWSGVMGQVTSREA  
DFAVCPIRFVLDRQPYVQYSAVLHTQNIHFLFRHPRRSHIKNIFFEPLSNQVWVCVLALVTGSTILLFHVRLERM  
LSNMENRFSFVWFTMLETYLQOGPANEIFRLFSTRLLISLSCIFSFMLMQFYGAFIGVGSLLSESARSIVNLQALYD  
SNLAIGMENISYNFPIFTNTSNQLVRDVYVKKICKSGEHNIMSLQQGAERIIQGRFAFHTAIDRM YRLLELQMDE  
AEFCDLQEVMFNLPYDSGSGVMPKGS PWREHLAHALLHFRATGLLQYNDKKWMVRRPDCSLFKTSQAEVDLEHFAPA  
LFALALAMVASALVFLLELFLHWLPDFRRRLGTMTST

>DmelIR92a

MLLQPLVMHLSQLLRRIIVGQYFAEFPSILIVYNNASATTPQLQLEYLSALELVLRELSKPIRLQWINVAFLKDLNDL  
EDQVMGALNSSVTEGFTILSQTHFIHARYYATRNANVRLKDKRYLFLCEDESPAELLCMDILQFYPHHLMVRPG  
TETAPTGTGPHPDPRRGGASVSTKNKDDGEGGAGNKTTSPYRDINFELWTQKFVGAVGNLDALLLDAFLPNETF  
ANRVELYPNKLNLQRRLVGSITYVYPTITNYVPAGQGDVPIHPQWPNRSLTFDGAEANVMKTFQCQVHNCHLR  
VEAYGADNWGGIYDNESSDGMLGDIYEQRVEMAIGCIYNWYDGITETSHTIARSSVTILGPAPAPLPSWRTNIMPF  
NNRAWLVLISTLVICGTFLYFMKYVS YRLRYSGTQVFKHHSRKLEKSMLDIFALFIQQPSAPLSFDRFAPRFLAT  
ILCATITLENIYSQQLKSMLTFFPYSA PVDTIEKWAQSGWKWSAPSI IWVHTVQSSDLETEQILARNFEVHDYSYL  
SNVSFMPNYGFGIERLSSGSLSVGDYVSTEALENRIVLHDDLYFDYTRAVSIRGWILMPELNKHI RTCQETGLYFH  
WELEFIDKYMDKKKQEVLMDLANGHKVKGAPQALDVRNIAGALFVLAFGVAFAGCALVAELLIHRMDLSK

>DmelIR93a

MNPGE MRPSACLLLLLAGLQLSILVPTEANDFSSFLSANASLAVVVDHEYMTVHGENILAHFEKILSDVIRENLRNG

GINVKYFSWNAVRLKKDFLAAITVTDCEWNTWNFYKNTQETSILLIAITDSDCPRLPLNRLMTVECRINAVVFVDQ  
TILEENALLVKSI VHESI TNHITPISLILYBINDSLRGQQKRVLRQALSQFAPKKHEEMRQQFLVISA FHEDI E  
IAETLNMHFVGNQWMI FVLDMVARDFDAGTVTINLDEGANIAFALNETDPNCQDSL NCTISEISLALVNAISKITV  
EESIYGEISDEEWEAIRFTKQEKQAEILEYMKEF LTKNAKCSSCARWRVETAITWGKSQENRKFRSTPQRDAKNR  
NFEFINIGYWTPTVLGFVCQELAFPHIEHHFRNITMDILTVHNPPWQILTKNSNGVIVEHKGIVMEIVKELSRALNF  
SYLHEASAWKEEDSLSTSAGGNEDELVGSM TFRIPYRVVEMVQGNQFFIAA VAATVEDPDQKPFNYTQPI SVQK  
YSFITRKPD EVSRIYLF TAPFTVETWFC LMGII LLTAPTLYAINRLAPLKEMRIVGLSTVKSCFWYIFGALLQGG  
MYLPTADSGRLVVGFWWIVVIVLVTTYCGNLVAF LTFPKFQPGVDYLNQLEDHKD I VQYGLRNGTFFERYVQSTTR  
EDFKHYLERAKIYGSAQEEDI EAVKRGERINIDWRINLQLIVQRHFEREKECHFALGRESFVDEQIAMIVPAQSAY  
LHLVNRHIKSMFRMGFI ERWHQMNLPSAGKCNKQSAQRQVTNHKVNMDMQGCFVLVLLGFTLALLIVCGEFWYRR  
FRASRKRQFTN

>DmelIR7a

MFHHLWLLMGLRSLAMGALHPPQPEAMTPLVAAALEILAEQVSPSQSTLAVMDLTQDAEHRDERQEQLMTIILRSV  
GSEMA LRTFQKPPAEVPASFVVFLVNSAQAFNTLGFHFTDIHSTREFNFI LLTHRMSSRAERLQVLRDISRTCVR  
FHTSNVILLTEKRDGVVLVYAYRLLNMDCDLSVNLELID IYKNGLFRHGHEARSFNRVLSLSGCPLQVSWVPLPPF  
VSFIGNSSDPEERAQIWRLTGIDGELIKLLASIFDFRILLEEPCNKCLSPDIKDDCSGCFDQV IISNSSILIGAMS  
GSHQHRSHFSFTSSYHQSSLVFIHMSSQFGAVAQLAVPFTVI VWLALVSSLLLVLVLMNRNLVCGRSDLASHA  
LQVLTTLMGNPLEARSLPRSSRLRILYAGWLLLVLVLRVVYQGKLFDSFRLPYHKPLPTEISELIRSNTYTLINQEY  
LDYYPRELTVLTRNGSKDRFDYIQGLGKEGKFTTTS LIATMEYYNMMHWSTSR LTHIKEHIFLYQMVIYLRHSL  
KFAFDRKIKQLLSAGIIGYFVREFDACQYRKPFEEDEYVTP IPLDSFCGLYYISLIWLSAAVVAFILELLSQRIW  
LRRIFE

>DmelIR7b

MKYWLYILSCSLVASTMESSDWDLAELAQVVANSEMGRFKTLYIYHTNSQSTGGHLEELLDQVLMIVPNNLQ  
ARRLLQQSM EYKPYHVAVLVDGLPSLSAIYARIRATQDLSHTLIYMSMPTDAYGEEMQATLRFWLRLSVLNVG  
VVLRP PGDHILMVSYFFPSALHGCQV I SANVVNRYQVGT KRWASQDYFP SKLGNFYGC LLTCATWEDMPYLVWRPD  
GSGSFVGI EGALLQFMAENL NFTVGLYWMNKEEV L ATFDESGRIFDEIFGHHADFSLGGFHF KPSAGSEIPYSQST  
YYFM SHIMLVTNLQSAYSAYEKL SFPTPL LWRAIGLVLI LACLLMLLVWRHHHELPRNPYELLVLTMGGNLE  
DRWVPQRFP SRLVLLTWLFATLVLRSGYQSGMYQLLRQDTQRNPPQT I SEVLAQHFTIQLAEVNEARILASLPELR  
PEQLVYLEGSELQSF PALAQQSGSSARVAILT PYEYFGYFRKVHPMSRRLHLVRERIYTQQLAFYVRHSHLVGVL  
NKQIQHAH THGFLEHWTRQYVSAVDEKDES VARIASTSYSTLDGIDGDP SLSESEEDQQVAPVRQNVLSMRELAAL  
FWLILWANLGA VVVFLLELLLPRIKLRKILRKMKKSTRASATTTSTLSSPSTTKDIPFSCKDGFQDSWPKCSLLVS

>DmelIR7c

MLHSAVHNVS LVYALVW AIDNYYGMATSTPLAVVQFPTSRESRRLHNDLIDAALGRSSGTGRIQFLLEDDR VEMTE  
TDTDP PPPSGLTGRPIAIWFLDSLRSYFRLEMYLNQLGSPYKRNGFFLV IYTGLEDQPMESLKIMFRRLNMVVLN  
VNVFLQRDGT VHLYTYYPYGP HHCQSSLPVYYTAFQDLAAPANGFGLTKPLFPRKLTNMHGCCEMVVATFEHRPYVI  
IEDDPKTPGGRS IHGIEGLIFRSLAERMNFTIKLVEQKDKNRGEILPDGNFTGILKMMVDGEVNLTFVCFMYSKAR  
SDLMLPSTSYTSFP IVLVVPSSGGSISP MGRLTRPFRYI IWSCILVSLIFGFVLI CLLKITALPGLRNLVLGRNRNL  
PFMGMA SLGLGALYNPQRNFARYILVMWLLQTLILRAAYTGQLYLLLDQVEMRSP I KLSSEVLAKDYEFRI LPA  
LRTIFKDSMPTTNFHAVLSLEESLYRLRDEDDPGITVALLQPTV NQDFRSGPNKRHLTVLPDPLMTAPLTFYMRP  
HSYFKRRIDRLIMAMMSSGIVARYRKM YMDRIKRVSKRRNLEPKPLSIWRLSGIFVCCAGLYLVALIVFILEILT  
NHRRLRAAFNVINRYAA

>DmelIR7d

MDIRCVALLGLCKVQAVVWPHQHLL EEQLASQISATLQKIFINGLAVYNFGVFISTSYEEMDRDRVILVHQVLN  
RNLPPNF PVAVVLASKMNRKITAQVFTQLLFVQNAEQAI AIAEGVNRNGLCVIVLLTSQPERPIMTKIFTYFMQE  
RYNIN VVILVPRLHGVQAFNVRPYTPTSCSSLEPVEIDIKDGLWDVFP RRLKNLHGCPLSVI VWDIPPYMRINWK  
SSDPM DGLDGLDGLLLRIVARKMNFTLKLIPNEPNGLIGSSFMNGTFTGAYKMLRERRANITIGCAACTPERSTF  
LEATSPYSQMSYI IVLQARGGYSIYEVM LFPFEKYTWLLSTILGLHWIVGSRWRMPSPILAGWMLWIFVIRASYE  
ASVFNFI QNSPVKPSPR TLDQALSGGFRFITD HASYRMTLKIPS FQGTKLISAGQPVDVFDALLKAPWKTGAF TSR  
AFLADHLVRHRKHRNQLVILAEKIVDNMLCMYFP HGSYFAWEINKLLFNMR SFGIFQHHSQILAWDNLP TTTDTDT  
PGKRIHSSTESVATGFAESMSFVVAALNCLMGALCISIVVFGLELLSRRRHWTGLEWLFERV

>DmelIR7e

MNHINEFVARAVLHVHHYILSVTPSLVLTLCRSNHTCNFYNKMMSTLFREWG LAPLQIVNVLRGVPWHPVPGRR  
HFNVI FTDSFAAFEEIRMEYYSREYNYNEHYFI FLQARDRLLO GEMRLIFDYCWRYRLIHCSIQVQKSN GDI LFYS  
YYPFGEHGCS DMEPQLINRYNGSMLVEPDLFPRKLRNFFGCPLRCALWDVPPFLTLDE DQEEVLRVNGGYEGRLLL  
ALAEKMNFTI AVRKVHVNMRDEALEMLRDEVDLT LGGIRQTVARGMVATSSHNHQTREVFVGLASSYELSSFDI  
LIFYPYRLQIWMGILGVVALSALIQLIVGRMLRERMGRSFWLNL ELVFGMPLLECPRSH TARLYCVMLMMYT LIR  
TIYQGLLYHLIRTHQNRWPQTIESLVQKNFTVVLTP IYQEVLD EIPSVQHMRFRLL EANS ELDPLYFLEANHQLR  
QHVTASALDI FIFHNRLSADKVHQRGEQGSGAHFEI VPEDIISMQLTMYLAKHSFLIDQLNEEIMWMRSVGLLSVW  
SRWELSESYL RNEQSFQVLGTMELYAI FLMVLVGLIVGLLVFILELVSMRSIYLRKLFT

>DmelIR7f

MQGEDANLYVARALRLVIENVLAQLSTTLVVTTISTRHLGT AHWFEYMMN ILMDSWRMVAVQLLRIRPDLVVPVPG  
RKRVSLLMVDSYQGLLDTNITASNANFDDPDY YFI FLQARDHLIPKELQLILDHCLAHFWLHCNVMIQTAQVEVLV  
YTYYPY TADACQKAYPIPVNTFDGRKWKASQMF PDKLSQMHGCPLTVL TWHQPPFVELVWDPKHNRSRGSGFEIQL  
VEHLAR MNFSL ELVNIALLRPNAYRLAEGSS EGP I EKLQQRNVNISMGYFRKTARRNQLTTPTMSKYYSANLVAVL  
QLERYRIGSLALLVFPFELSVM LLLLALLIHLGIHLP SARRGNEEDGGGGLQVVALLGAALARLPSRWRHRFIA  
AHLWASIPLRISYQSLLFHLIRLQLYNTPSFSLDQLLAEFGQIGCTANTQRLLLEMPQLARDPDSIQSVDPFDW  
DVLNVLTNRNRKI FAVANQDV TLSFLHSSAHPNAFHVVKQPVNVEYAGMYMPKHSFLYEKMDDDIRRLDASGFIH  
AWRRASFASVHRKEQVHMTSRRYINHAKLSGIYMVMAGLYLLAGLLFAGEVLLRQRN



>DmelIR7g

MNVTSLNLFESMKYIGAQTQAASINHHVAQALRVFIEDFYQRIAPAFIVVLSCRRPSPMNFYRNIMQLLYESVDTM  
IVQLVLVELGRPRRIAGPRTHNLLLVDSLDALLDIEIHTYTAQSDTSEYYFIFLQQRDALIPHDMQGVFAYCWRHQ  
LINCNVMTQSSGGQVLLHTYFYPYAPGQCNDSQPTRINMFLGESWKHRDYFPSKLHNLCGPLIVLARKVSPFLDL  
EGQRELRLGLEGRLLQELSRRMNFSIQFSGLQDQLKNRTTWTEKQLLQKLQVQERIAHLAIGYVRKRIQYATNLTPVF  
PHYSNRVVGCLLLNAHNLTSLIEIWSFPFQALTWICLVAGDRLALVLAVYAASLGLPIDPPERPSLQLLFASWLIFG  
LIVRSMYSALLFFILRYHLHQRLPGNLQDLTHGDYAAVMGRTTLODLREVPSLQDLLGLKSVIVTSEREEEVLRTL  
DRCTLREGAGSHPLFFGLISQDALLHLTQRGHRAGAYHIIPQDVLEQQLAIYQLQKSHSLASHLDHLVMSIRSVGLV  
HHWAGQMASERYFRSRFLYREKRIRQPDWAVYILTAGLYLLSLVVFICELLASRRAGL

>DmelIR10a

MAVLGTVFLLFMLDLKTLNLTNLRLNGLLVEPTRDLQLELWLRAGSDHQDAENPYVQWFLLRTEIPLSIVTYQENRY  
WMDDPFGRRLNLVLMVSLDQLLTNRGAAAPIQKASTFFYILADQDKDLSADEQLRLEGSCRLQWTQHVKVYNRFFLTR  
DGVWIIDPFKRRDSAFGRLVRYYGSETLDKLLFRDMAGYPLRIQMFRSVYTRPEFDKETGLLTRVTGVDFLVAQML  
RERLNTMMLLQOPEKKYFGERSANGSYNGAIGSIIKDGLDICTGFFVKDYLVQQYMDFTVAVYDDELICIYVPKAS  
RIPQSLIPFAVGYDIWLGFLVLTAFACALIWLTLRVINLKLRIVSLGNQHIVGQALGIMVDTWVWVRLNLSHLPA  
SYAERMFIGTLCVSVIFGAIFESSLATVYIHPYKYKDINTMQELDESGLKVYKYSSMADDLFFSETSPXWNRDL  
RADVIDEVARFRNKAGVSRYSLSILESSHFTLLRKIWWVPECPKYTISYVMPRDSPEWEDAVNALLRLFLNAGLIV  
KWIQDEKSWVDIKMRSNILEADAESLVRVLTIGDLQLAFYVVIGGNLLAFLGFLAEHFRWKLQKKG

>DmelIR11a

MRFAILWLFSGCLLPGIQVGIWVVVRAQPTGRDVLLSRLGNQONELNTRRLANASSYLTRNYIANRINTLVVREIC  
VECPYELSERQRQLVDQILASLAPELSVLLHKGTAETTWEEYTLFVVNDHTAFTGQVFIIPDELLEREFFCIVVVS  
EIQSRQFVRQTVGSIVKSNLQMHFVNNVVVAQLEDGTGVTYSYKLFKANCPTGITVRQINHFDRITGKPPQSQMPDL  
YPVRNGHLGDCPFNVGAHMPPHLIYKRHKDPPASNVSI PAEDLAGIDWDLQLLAKALKFRIQLYMPQEPSQIF  
EGENVSGCFRQLADGTVSIAGGLSGSDKRRSLFSKSTVYHQS NFVMVVRDRYLGRGLPLLPFRGKLWGVIIVI  
LLLAVLSTCWLRSRLGLSHPIEDLLTVIVGNPIPDHRLPGKGFRLYLLASWMLLTVLRCAYQARLFDVLRLSRHR  
PLPKDLSGLIKDNYTMVANGYHDFYPLELTCRQPLDFSARFERVQRAAPDERLTIALISNLAYWNHKNPNISRLT  
FVRQPIYMYHLVYIFPRRFFLRPAIDRKIKQLLSAGVMAHIERRYMQYENKRKVASNDPVLLRRITKSIMNGAYRI  
HGLVIVLATGMFILELLAGRSNGRLRRWMEVHQ

>DmelIR20a

MLASLNRSTGLSAELLDLYGLVVFLLSGEHTTLVYFNPAGLDCSWGVLWQRNLT AHPQIVWQRNYSYPDLYYQFN  
AKLLVLACLPMDSRAAQLEILANSLSHLRTVVRLLEI VAGPDQVTLARQYLSFCLRRSMLHVELYFRDYHHSILIL  
YSFRAFPSPFELVMRWISVGQGVKLFLHKLDDLGRHRLRVIDLSPNPTFFYRDARGDNQVTGYLWDFLATFAGRLN  
AGLEVVRPSWRAGSASDSSYMLEYSAGKLIDVGLTTTTITKWNLWAIHQYTYPLLVSSWCTMLPVEKPLATPDLFG  
RIVCPTLAMTLLLIILVTWLVRQLRCLTRLKNSRPARIVPHLLTLLLTTCSAQLLSLLIFPPYHVRIASFEDLL  
RGDQKILGMRNEFYNFDAFRARYAGVFYLIDDPNELYDLRNHFNTTWAYTMPYIKWLVIKTQQRHFSKPLFRWSK  
DLCFFDFMPTSVIVAPDSIYWESIKDFTFRIHQAGLMKHWIRKSFYDMIKAGKMSIKDYSDELTKPLNIGDLEIV  
WRVCGAAI AVASAI FIMELLYFYINVFFNSL

>DmelIR41a

MFIDLSWSLVLSAIVGKYLNESTICIFWNDKFEFQLLHKSDYISFVGINIKSFDDNGGHYIIDTGLKKKELQNKHL  
FLDELVIKIIISIEVTHCETFVVFDKIDRFVNAFNKASVYSIWRSLHNKFVFAHIANESPESRNHFFEDQPNILF  
VVRDHSSASSFDIKTNKFVGRKAENPSQMI LVDRYLASEQRQFQFGKSLFADKLNNLQGREV I IAGFDYPPYTVIKH  
NMSTNAQDMGVSGESDFKNVYIDGTETRIVLNFCEQFNCTIQIDSSAANDWGKVYPNMSGDGALGMLINRKADICI  
GAMYSWYEDYTYLDLSMYLVRSGITCLVPAPLRLTWSYLPLEPFKETLWAAIILLCLCAEATGLVLAYKSEQALYVL  
PGYREGWWTCTSFVCCTTFKLFISQSGNSKAYS LTVRVLLFACFLNDLIITSYGGGLASILTIPSMDEAADTVTR  
LRFHRLQWAANSEAWVSAIRASDEALVKDILYNFHIYSDELRLAQDQHMRIGFTVERLFPFGHFAIGNYLGPOAI  
DQLVIMKDDIYFYQYTVAFVPRWLPLDKLNTLIYSWHSSGFDKYWEYRVVADNLNLKIQQQVQETMTGTDIGPVP  
LGMSNFAGFIIVWILGSAIATLTFLLELSLTYILKQSNLK

>DmelIR47a

MRQIKLLVWLLVVGVSSTEQLQFLKNFLEAVHKERSISTILLIQRKVHKNDFLHGLYPIFWPIICLDETKRVELV  
NNFNKDFLALVMESEADTLLLSALAADLNHIRDARIMIWLQMSPSENFLDRIVFQASKQKFLNLVVIENLTKTRR  
FYFPQPKVQVIDKPFEEKEIYPALWRNFMGKNAIAVPDLVPPRSFNSFDPKTGHRRESGSIYNVFKAFTQRYNIT  
MLLKWPLIRNTTQEEIIGKSVRGEIDL PITGQLISFRHPNGSRSQPLLGMTALSIAVPCGPPELPMFDRFFLFYGLA  
TPITITGYVLLNTIEIILGTLSDRIKRHPRRKKILNLVNLRVFSCILSLPTPQGNRLRSVKGLTMVMSITGLI  
LSCIVAAQTSTILTMKPQYRHIKNFQELSDSNITVVCNHLNYLTIKQQMDPKFMAKFMQNIWI VNSIEQMKMIFDL  
NTSYAYQTFYSYKDPFTLLQMHTTRKAFCRTPGLDLVSGLAYTAVLEKNSIYALALQDYTLKAFSAGLVYYWAEES  
IRDLISTVGRTOFEKLPIVIGYQSLKLQDYNVCWKILLIGGALAFCVFIVEVVVGLINRRI

>DmelIR47b

MREAQIIIFLLTSAAAVTLKQYEFLLXSFLLKAGEQEQTITTLMMQKHVHTKNLLQGLYPXPWPPIIHVETQRIKFI  
ALLYMSSEKDI FLSSLAANLKFERLDKPFGKSNI FVLWRNYMGXIALTLDHLVEPRSFYWTDPRTNIKRRTGYIY  
MLITNFAEQHNITLQLXSPNEDMSQMVI IERTHKGPRSTHNWADDQLETFERXQDSLPLPHGSMIAIVPCGQEMS  
AYERFHAHAFAFRAPIIFPGFHI FLSLIDFLLRTISDRICNPRRIQLLQTVLSLCLVLRCILSTSLPNSNXLSRLR  
DNSPXXXVLQAXSYSALWXLGTGAXQXHNDRDQSHKLDHYXTT DGSXHSIEVPGLLKARNXXIXLFHIFSSLGTKF  
DLRIGSAGSHTSGVEFRYYELLDXRSSLENINVSQVFITILKLPYSRFRVLKLEDRCGCWQTLFVGFSIATFVFIVN  
VLMGFFFRNINQKK

>DmelIR48a

MHLLITETMYIIGKTLHDILNELNERLIISTNII FCKQFDNLIHFEAQTSRFVYSSLEAFNITSLWNHVGNDNKL  
FVIVGNVPYELFAKLELSSPENCTQFILNNTVDMCADALVKNSKAFSVSRELRIAPANVIVPHGKPLLSYRYLAAP  
FNTKWVIALGTYVFLISGFLCLIHWLRSKGWDFSQNLLEVYSSLLFTVFHLKATNGIERIYILFGVLFISGIFYSTS

YLRLKSLMLIAETFEKQIQTFEELAESNIPLLINPYDRMIFQH HHIPKSLWTAVRTVSSETLLNHRSHGYVRLCPA  
ILTAS KIPSHTHRHLFVCRFSHEQEVVPKGSSXXSLVPCIRKRNREXNHLGCLSGVSWPGISXFFHYGALGGEAF  
GSILLHDANYFPSPRLFRRLAELHYGSY

>DmelIR48b

MILQQSSNLLKLLLLLAISSVRTQGLNDIIIELNQRLNISNNFLYCNQSDKLN EYEIKYLQHMPPISLMIFT SIES  
MNFTQVEYNLGADNKLFLIMGNEEPPYDFLHALNLHFQFAEYIIVIDE PVDLKKSTKWLD FVNHLWQQGYVQLLIY  
TSYDEKLYHKIIFPETVIEETLVEQYISIRGSFN NLYGYPVRVAAYNNAPRSMLYVNRWGKHI FAGFYMRFLRAFI  
DARNGSFVPVLTSPNSPGNCTNLNVNETVDVCADALAA NPAASFSLTHGFR IASANVLVTHAKPLHSYRYLTAPFQW  
SVWACLVIYVLLVFNFLSFIGWLRSGKWEFSKYLLLEVFS SLLFSGFYLKEIRGRERYILFGVLF IAGFVYSTEYLG  
LLKSMLISEVFEKQIDTFEALVESNITLMVDPYDKILFAKYNMPEILSPIMELVSFETLLKHRNRF DQDYAYILFS  
DRMALYQAQQFLKHPKLLRIPIDFSFLYTGI PMRKRWFLKHHLGRAWY WAFESGLTRKLLADADFEAVRVGYLSF  
LITEHVEAQPLNVDYFVMPAIALAIGYILALLSFVIEMTAWRIREFLGC RKATMTSTGCSEGGHVDVD

>DmelIR48c

MSLLRIILIIIFLRIVSSIPDTIISHLSAELQIKIQIYFGLGNDLYDFSRLDGN YQKIIISHNISEEFKTYHDEPV  
LIIIRLERDLN LNLATLDVLRSYLTDRQYNDILLIDNDEENLNSYVDIRKAYWNAGFSQVLIYNSQQR TWSIKPYP  
YLQIRPTSLSKEYIENRNRNLMGYPLRVLVLTNDPPHCFVDKDELPGSPNRYKGSIVTMLKIFADQLNATFQANPFR  
EFRRYSTADCVQMVSDEIDACGSIFIRTYTYATSQPVR LNRVVI MAPFGNPIEKFYFFRPF DLYVWIGTGIIIV  
YIAVMGSLHLHRWHFKEWNVGQYLLAVQTLNRELSLPQSSSGSKFM LLLLLFAIGFILSNLYVALLSMMLTTKLY  
QRPIENLADLKAANVNILLQTHNIRPN SVYGSSEELRERFL LVEESQHLEKRNGLDPSYAYVDS EDRMDFLYLQQK  
FLRRRRMKKLSNPVGYTWAVQVIKQNWVLEKHYNDHVQRFFETGLQNKLVDDVHELAVKAGFLHFFPTQTQTIEPL  
RLEDIVMAAMVLGGGHALAVICFLVELFA

>DmelIR51a

MYNVLVLFLLLFTRAQMEPHRRGHNM TLLRSVLT VIRGRENWKNTPIFLGGHCNSDDLNNLMSWLQNTMEV TCHTV  
DTSTS AKENALGHFNINADNSLGLLFCQSSHELIWFNMDKRLRRLRGIRLIVILSDKRSSSSKAIMSTFKRLWHF  
QFQXNFQGYVSTPVENDIPRVFFVKDKKTGRKQIRG FYRTFVEYLHRYNASLHVSNSQGEHAINSSVMGRIIN  
QIVDGQLEISLHPYVDPENMGDNSYPLLIASNCLIVPVRNEISRYMYLLLP LNQSSWILLG SVIYISGVLYYIQ  
PGLLHRTWDQRIGLNILDSISRIINICSPSRIYNPSLR YFIVSVHLSILGFVVTNLYS IMLGSFFTLLVGEQVDS  
MQQLIQXQQKVLVKYVEVSTFLRHVEPDLVDGVAQLLVGNASEQVSALLGFNR SYAYPFTLERWEFFSLQQQYAF  
KPIFRFSSACLGSPIIIGYPMKSDCHLQSS LNMFI MRIQAAGLLRHWVVSDFNDAMRAGYVRLLENFLGFHSLD VDS  
LRLRWAVLLCGWLLSTLIFLCER

>DmelIR51b

MCKVLTLLVVILLALLTNAAYNV TLLKSVLSLISTREP WINTPIFVGHNTOGGDLNDLI IWLHQTMGVTSLTMNLF  
LQPEHIRPLGHFKITRYNGIALFFCHDKHDIMWLT LDRNLKRLRIRLIIILRNQRSGSQGAIKSIFNALWQYQFL  
NVLVLQRDQLYSYTPYPAMRFFKLDIHT EPLFPHAARNFHGYVSTPAENDIPRVFHVHDPLTKSRKVLGYAYRTF  
VEYLDHYNASRLTNPDENLDPTTSVMNMHIVQLI IDGLEISLHPYVFTPPTATKSYPLLIYPNCLIVPMRNEIP  
RHMYYLRPFQLYSWYILLFAVFIITGILY CISPKLNKSSWPQRLGLNFLDAISKILFISPPIT IYRPTWRHLIIFL  
QLSVLGF MSTSWYNIELDSFFTIVVGEQVNSMDQLVHQQRVLVKEYEINTFLRHVEPRLVEKVSRLLPVNASE  
QVSALLSFNRSFAYPFTTEERWQFFAMQQQYAFKPIFRFSACLGS PHIGYPMRVDSHLETSLNHFI LKIQDTGLLN  
HWVVSDFNDAMRAGYVRFDNVLGYSIDVDTLRLGWCVLGIGWILSALVFSCEYWHLYPWR FIA

>DmelIR52a

MALGWSVILGFIGQLSAQILNYTQSRDLELLEGLS LFRVLSRLNLEEEYNTLLIYGKECVFHSLLRKLEISAVTVP  
SGSTDYDWSFSTAILILSCGYDAENEENSYTLMK LQRTRRLIYLEDNSEPESVCMRYS LKEQHNIAMVKSDFDQSD  
TFYSCRLFQTPNYVEGHFFKQDQPIYIENFQNMRGATIRTVADSLVPTI IYRDEKSGETKMMGYLGHMINTYAQKL  
NAKLHFIDTSKLGAKKPSVLDIMNWVNEDIVDIGTALASSLQFKNMDSVWYPYLLTG YCLMVPPVPAKMPYNLVYSM  
IVDPLVLSIIFVMLCFLSVLIITYQHLSWKNLTLANILLNDKSLRGLLGQSFPFP PPNPSKHLKLIIFVLCFASVMI  
TTMYEAYLQSYFTQPPSEPIRSFRDIGNSSLKMAISRLEVNVL TSLNNSHFREISEDHLLIFDDLSEYLVLRDSF  
NTSFIIPVSVDRWNGYEEQQKLFAEPAFYLATNL CFNQFMFLSPPLRRYLP HRHLFEDHMRQHEFGLVTFWKSQS  
FIEMVRLGLASMEDLSRKRNEEVSLLLDDISWILKLYLGAMFISSFCFLEILRCGERCKRLWR CRW

>DmelIR52b

MTWLVIILCFLGYMAAHIA DISVQNQSLMDNELINLLKL RNEEFYDTLLVYGKDCEFH SVIKNVDVAVVLVSDSM  
NFEWNFSSLTLILSCGPDIDNGGPNSTSIKLQRNRLVLLKEDFQPSN ICNIYTQKEQYNIALVRENFTKSKSIYT  
CRYFQDPNVDEVNLSG TKPIFIEQFQNMKGKAIRIVPDL LPPRVMLYQDANDGELKMIGYVANLITNFAQKV NATL  
QLDFLKPSTSITEISRMADDELDMGITLEASLNTSNLETSSYPYLLTSYCLMVQVPAKFPYNLVYALIVDPLVLG  
IIFVLFLLLSVLLIYSQKMSWQDL SVANILLNDKSLRGLLGQSFPFPLNASKKLRLIFTILCFASIMLT TMYEAYL  
QSFFTNPPEPEICSFQDVGSYNRRIAMSALEVNGLIKTNNSHFREIRMD DLEIFDNMPECYELRDAFNLSYNYVV  
TGDRWRSYAEQQTLFKEPVFYFARDLCFSRLIFLSVPLRRHLPYRHLFDEHMMQQHEFGFVNYWMSHSFFDMVRLG  
LTSLKDL SRPLATYPSLLMDDISWIMKIYLA AIVLCVFCFLLEIGVDKWKRWMKFRNLQILNTC

>DmelIR52c

MVWLIIILFCLGNSSSQI LDVTNNSHLDFDYRLFGLLQRLQVEKSYDTLLVYGEDCAIPSLFERLQVPAVLVSSGS  
TNFDWNFSSLTLILSCNFQDEREENYRTLMKLQTSRR LILLKGHIKPESVCDFYSKKEQHNVAMVKENFYQLEV VY  
SCRLFQDQNYEKL NLFDGKSIYKDQFRNMHGAPIRTLS DKEPPRTIPYIDSKTGEEKFKGYVGMLISQFVKV NAT  
MQIREDLIKDDEEVSFVDITNFTSNDILDIGICEARTLEMSNYDAISYPYLMSSYCFMAPLPDSL PFSDVYMAIVA  
PSILIMFLIIFCICSVLI IYIQERSYRSLTIRSVLMNDICLRGFLAQPPFP PRQYNRKLLIFMLVCFSSLI STTM  
YTAYLQAF LWGPPIEPRLTSDFDVKKSRYTMAINIYEREFLEALNVSLEDVEIYDYGKFSKLRSTFNTNYLFPVTA  
LQWFTINEEQKLFKYKIFYYCAFLCNQFDILSIPLRRHLPYRDI FEEHMLLQKEFGLTKYWIDQSYRDMIRANLT  
TFKDFSPLLENDYIEVHNLYWVFTMYFVGMMGLCFFILEILRPLRYWRNCKIKCEYCYAFLKNFAK

>DmelIR52d

MVRIIIILLCLGYTKARILDATNTNHTDLEERLLSLLLRLQQEQFNTLLIYGEDCAFSSLSRRLQVPTILVSSGS

TSFEWNYSSLALILTCEFKAEREENYQTLKKLQMNRRILLNGNIKPDSCDFYSKKDQYNIAMVNNNFHQVGIY  
ACRLFQERNYEKVLSEGNPIYVDQFRNMQGALLKSITFNLI PGSMAYRDPKTGQEKHIGYVANLLNNFVEKVNAT  
LDMQVKLHKAGKKTsfynITKWASEDLVDIGMSYAAYFEMTNFDTISYPYLMTSTCFMVPPLDMPNSEIYMGIVD  
PPVLVVLIAIFCIFSVMNLNIIKQRSWRSLSLVNVLLNDICLRGFLAQPPFPFRQSNRKLKLISMLVCFFSVITTTM  
YTSYLQSFMWGPPIDPKMCSFADLENSRYKLAIRRYDIEMLRPFNVSMDHVVVFDESSQLEYLRDSFDDNYMPMS  
ALSWSAFKEQQKLFAFPLFYSEKLCCLKPISFFSFPIRRHLPYRDLFEEHMLQQNEFGLSTYWIDRSFSDMVRLKL  
ATMNDFSPPRLEDYIEVSDLSWVFGMYFTGLGISCCCFGLELLGLPSWTRRLRLTNWLRVRN

>DmelIR54a

MWTVITGIVLWAPVLVAGSAVDIFRAAAEHSLSVIMIRIDYCPYNWAKDIFENQTI PVVVLSDSETFINIRMFSR  
PLHVACLPGHQLQDLALLENFTSSLMDFPSQKKIVYISNNFSDPTRMDYIFETCYHRRINWIVGLLASDEHRYFY  
RYHLYPSFRTHEYRSLESSTIFDKDFPNMHGHP LTVMPDQWLPRSVLYVDRRTGKQILAGSVGRFFHVLSWKNATL  
QLSKKVTTGRFLNATALKELSESFSVDVPASLTIMERVEQLASTSYPMETHVCLMVPVARRIPIKDIYFILSSAS  
NMFLAIVIVSSYGLALNLLRNMTHRDVRLVDFVLNDKALRGILGQSFNLPLSRSFSTRLI FLMLGIVGLNVSSI FG  
AGLDTLMAHPPRQFQARSFAGLRRTKIPLVTTEEDFPTWMKLRVPM LVNVSEYNHLRNGRNTSNAYFASRLYWNL  
FSEQQKRFTRELFYISTDDCLWSLALLSFQWPQNSLFTPEVSQLILEVNANGLYDFWVGMYHYDMTAAGLSGLEDP  
SLQLKEREHPTSLRIVDFQWMWQAYGTFMVAIALVFLLEVSWHRITSLSLVSVY

>DmelIR56a

MGSRFFIRNLILFGLLASSNMQIPFGELEKKFELDVDVFLGVTTELVGHIQGLYSITVYADCIDIHPSIQQRIMDKF  
MVPVNTIGSNLSRPNYHKL DNSRIRIVLFTGLNDTILVNLNKTDVPYSDNFYMLAYASAIKNKCIELDFIEEVFTL  
LWKMSIQNAILLIRGEFMMEMWSYLYMGKIHKIKLTKPNSYLESRLKYNRFSLEVINDPPAIFWYNSSEQADVTG  
GGNLSVSGPLGLIIINFLRHLNVTIDIVPIPGKQTSQYELFQQPDNLRAENGVMVGSALLKYSPMVTQSRMCLLV  
SNRRMIPFSRFLDRLVSPGVHKLTFVSSIGIFVIKYFSHRPRSFDVAIFCTIRFFFAIPLPSIILNRLPVDRFIE  
VFIIIFVQILLSSNISITTSALTTFWEPPINIVETMRASGLHILTEDPTILQAFKENILPSSLADLVILVDEDTY  
FHHVTTLNNSYVYVQAHNWQIFRLYQQMTNEPFEIASEELCSKWRILGIPLNPKSPLRFMFKDYFYRILESGLR  
EQWVHSGFKKCEFNNLKKLPVDSVDSWQPLSIEFYSNVIRAYIIGLVIATLAFVAELLHNGYRRKNVKKT

>DmelIR56b

MLLDTDLASGVIRSPYSFDIPHAFIFNETQFVVPKFCGPYMEIVKHFAEVYHYQLFLDSLESPLPKKSVEQDIISG  
KYNLSLHGVIIRPEETSDFFNATQHSYPLELMTNCVMVPLAPELPKWYMWVPLGKYIWTCLFLGTIFYALLLRYV  
HWREPGNATRSYTRNVLHAMALLMFSANMNMVSKLKHASIRVIFIYTTLLYIFGFILTNHYLSHMTAFDMKPVFLRP  
IDTWSDLIHSRLRIVIHDSLLEELRWLPVEYQALLASPSRSYAYVVTQDAWLFFNRQQKVLIQPYFHL SKVCFGGL  
FNALPMASNASFADSLNKFILNVWQAGLWNYWEELAFRYAEQAGYAKVFLDTPVEPLNLEFFTTAWIVLSAGIPI  
SSLAFCLELFIHRRKQRRPQYERFECYDY

>DmelIR56c

MRSSFRICLFLLLTTYHPSHGNMQHLLNLLAPFGRMNVFQEI VWFVSPHQRLDQLDEFIMRIDEAFGKSATQTVVN  
NNTEMRMIISSARRNHMSFVFTTGAEDPI MKVFSKVLLGRHFYVSMVIYVDKVGDMHPIYDLLTFAYNQPFNSMV  
HFESMEGVNQLFGVSKFPVMSFENRTDFLKYMGKIWKQVQNARSDVGGFGFTTPLRQDLPHLFQSQGHYDGSTYRI  
IETVFVRFINGSFKELIMPPDSLGGQVINMKDALQLIRERKMEFCAHAYALFMSDEELEKSYP LLVVQWCLMVPLYN  
SVSTFYFPLQPFDFWNVWFFALGALLALVLELMWLRMFGWSGYRGAVLNSFCYIINVPIEGQLQQPCLLRFLLLA  
TVFFHGGFFLSAYYTSNLGSILTVNLFHAQINTMNDIVSAQLPVMIIDYEMEFLNLNLKELPQEFLELLRPVDSAVF  
SEHQTSFNSSFAYFVTEHDWEFLDEQQKHLKQRLFKLSSICFGSYHLAFPLQMDSSLWRDIEYFTFRIHSSGLLN  
YARSSFGSALHAGLVQRMPDTQEYTSAGLQHLAIAFILLVMSFLAGIVFVLETLSR

>DmelIR56d

MDNRAELILRERNIFPTNGSDNITLLNMFVLEMFYRITQLYHFKNFIFYISERLDLNNKDSQEFFHNFWTYFPM  
APNLIITREHHLGIPMMQFISTPSLVMVFTTGKDDPI MELASHNQQGIHWLKTIFVLFPSLQSRDFETNPESLAQF  
TAEIKVDYDWVRKQFINITFLITIKDNVFI LDPTYPTPSIVNKTGVWQAEFFHKYAKNMKGYLVRTPILYDMPRVF  
KSDRPTNRYEKNFIHGTSGNLFLGFLEFVNATLMDTSANVTADYLNMTNLLDLVSQGVYETLIHSFTEITTKFVVS  
YSYPIGINDCCIMVPYRNQSPADQYMHEALQENVVVLISLFTLYITVAIYLCSPLRPRDL SAAFLQSICTLTYSVP  
TFIIRTPTLRMRYLILAIWGI VTSNLYISRMTSYFTTAPPVRQINTVQDVVEANLR IKMLAIEYERMAKSPLOQY  
PESYLNQVDLVDKHMLDLHRDPFNSTFGYTVSSDRWRFLNLQQLHLRKP I FRLTEICEGPFYHVFLPHKDSHMRSV  
MTEYIMIAQQAGLMNHWERETFEAVHLHRIHVH LFDDEPMALSLDFFSSLLRWTWTLGLILAGLAF AAEMKWEHV  
TFKRRPVIRITRKPRSF LRRFMKL

>DmelIR56e

ERXAFRNQWAFCFPRTXAIEVVLSAWSXPXCPGQRSKPQPI SXPHXGSCWRKRKWKXKPRLLVVDKRTLVEHLNSL  
NDGYAYCIIAGHWQVGMM

>DmelIR60a

MWCNPNGLIIIFLGQILNLCQGIVNLSNETANTVIFMLPEKDLGPDVWKAGVGC LDSFAQIFFFRNPKERFTRAY  
NLMLVHAFHLSPPADQIQEGFSKLINEAVTNPGPPDREELFQMRVASDYNITNGTEDKGELILADNYVIVDSVDR  
LKELMKKKIVEMRSWNPGARFLVLFHNATCRNRPLGVA SNI FKDLMEMFYVHRVALLYANSTMNYNLLVNDYYSNV  
NCRIILNVQSVGQCHDGKLYPNNAVVKASMQDYVSGFSRPNCTFFACSSISAPFVEADCILGLEMRILGFMKNRLKF  
DVNQTCLESRGEMDGPANWTGLLGKVQNNCEDFVFGGYYPDNEVADHFWGSDTYLQDAHTWYIKMADRRPAWQAL  
VGIFEAYTWIGFILILISWLFWFTLVMLPEPKYYQQLSLTAINALAVTISIAVQERPICETTRLFFMALTLYGL  
NVVATYTSKMIATFQDPGYLHQLDELTEVVAAGIPFGGHEESRDWFENDDMWIFNGYNISPEFIPQSKNLEAVKW  
QQRICILSNRMYTMQSP LADVIYAFPNNVFSSPVQMIMKAGFPFLFEMNSIIRLMRDVGI FQKIDADFRYNNTYLNR  
INKMRPQFPETAIVLTTEHLKGPFILVVGSCAALTFIGELI IHRWRTQLVSTSEQQDRRSDKRRRRRRRRRKPEK  
DNRWQRQVQVAPVVRFTPVKRRKVFQGGTSQK

>DmelIR60b

MRRSLYLI I AIGLVDVHCVSLRYIILNALENELQYRAILLVESASEIESCWEQKYIQGAVPILNFNANQSLYKDAL  
NTNIALVCLNENVESTMQALYENLED MRDTPTILFVLSDSKVQDVFLECLRKMLNVLAFKGLDRGFVYSFRAF

TFRVIERNVMDILQYFEQQLEDLGGHTLTTLPDNII PRTVVYKSPDGSRQLAGYLYPFLRNVYSTINATLKVCWHL  
VPEDGMIQLGEVVRLEIHDVDFPLGMHGIHGSTSQNVPLEVSSWFLMLPMEPSLSRAQFFIMLGFEKVTPVLLL  
LTILLSTAHRIEMGLRPSWRCYVLGDRVLQGTLGQAFFLPRRLSVKMLVYSLILLNGFTFSNYSITSLETWLVHP  
PSGHPHISWEQMRTLNLKVLIVPSELDSMTKALGKQFTESNSDLFELSKSGNFQDKRLAMDQSYAYPVTCTLWPLL  
EHAQIRLPKPEFRRSREMVLIPLLIAMPLPKNSMFHKSLNRYRALTHQSGLYEFWFKR SFNELVALRKIHYKVNG  
DHQIYRDFEWQDFS YVWLGFVGGT IASILVLLAEIGYHRWQLNQN

>DmelIR60c

MEMRLALFFTFACLAGAHDGSLRNMLKSLEDELGYRTILLLEGFVYSFKAFPTLRVVKRRVKDVRRYFEPQLEDLG  
GCVLKVVDPGIMPRTMVYQGEDGELQMGGYLSHFIRNVYSTINASLQIRWDLFPEDGDFDMDSLTGSNHVDFPLGL  
GSLSFQTLHKDVAMEISSWFLMLPMEPSLPRARFFIRFGISLYLIPLIIILLAIVLSNAHRFEAGLTPSWRCCSMGN  
TVIKRKLVEIHRYFEPQLKDLGGHIVSALPGNIMPRTMTCYRNAEGERQLAGYLNTFIRNVYESINGTLRISWGLVPE  
DYLKSI RGA EYVDAHSDVFQTADSTDFQTQRMSEMHFAFSVTGTLWPLL RQAQVKLHRPIFRRSKEMVFLPFVIM  
GMTMPNNSIFLSSLKQYRLRTSEAGLYLLWFKKSFSELVAIHKISYKEDWVHDSYSDLKWEDFLFAWLGLFGGTTV  
SCLALLAEIGYHRWLWKRTHQ

>DmelIR60d

MRLAIYVAFLLSSIGNRSGFLSSLLMSLGKELHYKTILLVGGSSSTCWSLEPFETGVPILNLRGENNAYPQDTFNSQM  
LALACLQTESEDAVKLLYRSLKDMRDPTLLFASSEEHIDTLFLGCFRENMLNLVALTASSKEFIYSYQAFPTFR  
VIKRLVVEIHRYFEPQLKDLGGHIVSALPGNIMPRTMTCYRNAEGERQLAGYLNTFIRNVYESINGTLRISWGLVPE  
DDMRHLTISRLSKIQHVDPLGIIPLYNKTDKQHVMEISSWFLMLPMETSVPRAHFLVKLGLERLLPIIVVVGAV  
LGNAHRIEVLGPSWRCCYLLADKVLRGALAQPIVLPRLSPKLMLIYSLLLLSGFFLSNYMASLTTWL VHP PASD  
RILEWDQLRYLHLKVLTIPEEFKYMSLILGTDFMTAYGSIFQLTNSTDFQRRRISMDPSYAYPVTTSWLWPFLELSQ  
VRLRRPLFRRSYDMVLQPFQVMSLPLPRNSIFHKSLRLRYAALTRGTGLYYWFRRSYELVALGKISYKEEGNPY  
CDLKWNDFRIVWLAFLGGTIIISCLALLLEVAHYRWHLGNSSL

>DmelIR60e

MVIKMISFLLVSVLLCLVGASDESSEQVQLQDLNLALQTELVNFIDFECCATSEILHKLDSPRILLSSNSREARD  
LRIRGNFTTESTLIIIVSVMDSDLNPLVASLLPRLDELHELHIVFLSNEEPGFQKQDLYTYCFKEGFVNVI LMSGKG  
LYSYLPYPSIQPISLSNVSEYFDRARIIRNFQGFVRI LRSTLAPRDFEYSNEQGGLVRAGYLFTAVKELTYRYNA  
TIESVPIDPLPEYDVYLAVAEMLHTKKIDIVCYFKDFSLEVAYTAPLSIREYFMAPHARPISSYLYSKPFGWTL  
WAVVISTVLYGTVMHLAARGARVEIGKCLLYSLSHILYNCHQKIRVAGWRDVAIHGILTIGGFILTNVYLATLSS  
ILTSGLYDEEYNTLEDLARAPYPSLHDEYYRSQMKAKTFLPERLRNLSLSLNATLLKAYRDGLNQSYIYIYEDRL  
ELILMQYLLKTTPRFNMIRQAVGFTLESYCVSNSLPYLAMTSEFMRLQEHGISIKMKADTFRELIIHQGIYTLMRD  
DEPPAKAFDLDDYYFFAFVLXTVGLISSLLVFFAELVSGHL

>DmelIR60f

MRFHNLNIANSGLLGLHLCPTRSALPEQNPCFSKAGAVIXNLTLPWRRWRERCLLGALRPXTLPTPELQCXSKYLPX  
RKSQQENASSGLPGFCXGDXQTELRHGSRAIALPRSPYHDLYYVWIAYLGGTMIGIGMLAVEIACFKWDLRRPPI  
XMY

>DmelIR62a

MYLQFLFALFLSRYQIVATENFDRAFELALFLDRIGRVHRLHAITIVNSLGSVDPSYLLDHLRGLMCNSSNHFYML  
PQMTATDKDSSHVHFSSLQDEETIYLVFARDSKDAVIYLQAERARGRRYTRTMFLLRKQESQDKIKYFFELLWKLQ  
FRSALVVVAARNFYQMDPYPTVRVIRMRLSSYDPHHVFPANRKNFRGYRMRLPVQQDVPNTFWYKNRRTKAWEL  
AGLGGILINQLMMHLNVTMDLFRFEVNGSSLLNMAALTDLIVKGKVELSPHLYDTLQSNTSDVDSYPTQVAPRCFM  
IPLDNEISRSLYVFLPFSLTMWLCLLFVLLVVHFVYVRLIPDGHFWAILGVPGAGQVRYGNRKPVRRFSTFLILF  
GIFILGQTYSTKLTSSLTVTLIRRPDNLSEELFLLPYRILVLPD VYAI VDSLGHAEQFSTKFSCTDAENFSQKRI  
SMHPEYIYPISTIRWFFDMQQRFLRKKRFYFSKICHGSFPYQYQLRVD SHLKDALHRFLHLHVQQAGLHDLWLDTC  
YRKAHRMGYLKDFSTLAELEEKLRLRPLALNLLVPAFSLFLCGMLGSGIAFLVEIRHSFGCRQKPPSINRNPGD

>DmelIR67a

MLPILVPVLLLFNETSWINPILTSIYKDRHHETVLLLQHSQHGNASGLERFPWPVVSFNEQMDFYVRGKYNSEMLV  
LIWQTGNSDWDLDLWQALDRSLLNMRKVRVLLLRKWEKIPTADVAATAEHLFLHVAVIGQGNRIYRLQPYAPQSW  
LQVDPIESPFIKIRNYFGRYIVTLPDQFPFRSIVYRNPKTDEIQMTGYVYKFLLEFIRIYNFTFRWQRPVQGER  
MNLILLRNMTLNGTINLAISLCGFETPSXLGVFSDVYDMEEWYIMVPRAQEISIADVYVVMVSGNFLIVLIIFYFI  
FTILDTCFGPLLKLRVDWSNLMLNERMISGIMGQSFNMSARNTISSKVTNATLFLGLVLSTLYAAHLKTLTLTKR  
PTSQQISNFKQLRDSPTVVFEEAERFYLKHAWDRIPIRYIKDQLNFRETIEYNALRMGLNRSNAFSA LTSEWMIVA  
KRQELFKQPIFTVQPEL RVIQTSVLLSLVMQSN SIYEDHINDLIHRVQSAGIVEYWKHQTLREMITMGMISQKDPF  
PYVAFREFKVGDLFWIWLWVSFLFMSFVIFLCELLVDCFISKTLIRNKRPH

>DmelIR67b

MELLYLNTLQSLSLLEGNRLVQTVQELNNIYQTELVNFLEFGNGADILESAGQTFVPTLWIKNPQNQKVMKGNFTS  
CTLTILYLEDEHLDRGLYLANWLWEYHHLEVLIFNGGSYDKLIQIFSRCFNEG FVNVLVMLPGSDELYTFMPYQ  
DLKILNLKSIKEFYSLSRKKMDLNGYNTSGLVIAGAPRWFSFRDRQNRLIILTYMLRMIVDFTNHFNGSVRLMN  
LTVNDGLELLANRTIDFFPFLIRPLKSFMSNILENCGLIVPTSRPLPNWVYLLRPYAFDTWIAWLIMLIYCSL  
ALRILSKGQISISAAFLKVLRLVMYLSGSRDMGTRPTTRRLFLFVILTTSGFILTNLYVAQLSSNSAAGLYEKQIN  
TWEDLDKSDSIWPLIDVDIKTMEKLI PDRTKLLKKIVPTLEADVDTYRRLNLTSCIHSGFFDRIDFALYQQKFLRF  
PIFRKFPHLLYQQPLQISAAFGRPYLQLFNWFVRKIFESGIYLMKDDAYRHGIQSGLLNLAFDRHLEVKSNDVE  
YYYLIAGLWFGGLTLATVCFLLELLIGYAKIKVTISCKNMIM

>DmelIR67c

MFCWLIFLNIILLSDRSSESWSAREVIHQFNHDQQLQNLNIYDCNDVELQIGQEVSNLFVNSTADKMKILGRFSSHS  
LIIACFKDSTRNRTLNGVKELLWGLQYLPILFVVD SNMDFYFQQALRHGFIHVLALNFMNGSLYTYKPYPKVEVHQ  
IKDMQKFYKLTCLRNLQGQAVRTTVETMTPRCFRYRNRHQQLVYAGYMYRMVKEFISTYNGTEEHVFGNVDTVYK  
EGLAALKNGEIDMPRIHALEWYFYRSHILYNIKTYIMVPWAEPLPKSLYFIQPFRTGVITIMVSFVYASIVI

WWIRYRQQGSSSLTQSFMDVLQLLFQLPLSKIWHFNMGTHQVVSFIVLFVFGFMLTNLYTAQLSSYLTTGLFKSQI  
NTFDDLFREKRTLLVESFDAEVLHNMTEKIIQKEFESIILITSEIEVFKHRKSLNTSYAYEAYEDRIAFELSQQR  
YLRVPFIKFILKEVYDQRPVFVALRHGLPYVELFNYYLRRIFESGIWIKLQEDSFLEGIASGEISFRKSKSREIKIF  
DKDFYFFAYILLGMGWCVSTIALFLELWSFKYSVTNLHEG

>DmelIR68a

MRCLWILIVAFISLAMATSIPIPIANPAPLSGYEMQLKILLQKILWVANVKRCFAVITDDLHYPIYDRIFVESVGR  
RVIPFFVMRTNESDDLQRPSPQVELFVKAIKSSDCELNVITILNGWQVQRFLGYIYDNRSLSNMQKKFVLLHDLRLF  
ESDMIHLWSVFIDAIFLKRQLDNKYTISTIAFPGILSGVLVMKNIANWELGKGLNGRILFADKTSNLFGTSLPVAI  
SEHVPMVLWANATKSFQGEVEIMNALGKALNFKPVYYPKNQNTENMDWTELDGGASVAYGSGNPDGYAQNTHIDS  
MLVDEVAHARSARFAIGDLHLFQVYLKVELSAPHNFECITFLTPESSDTSWQTFILPFSAGMWVGVLSSLFVVG  
TFYIAISFLNAIINGNVSEFFRCLRPNRNVPMDPKIYRISFRIASRYRSSKGRMPRDLFDGYTNCILLTYSML  
LYVALPRMPRNWPLRVLTGWYWIYICILLVATYRASFTAILANPAARVTIDTLEDLLRSHIPSTGATENRQFFLEA  
NDEVARKVGEKMEVFGYSDDLTSRIAKGQCAYYDNEFYLRVLADESGSALHIMKECVLYMPVVLAMEKNSALKP  
RVDASIQHLAEGGLIAKWLKDAIEHLPAEALAQQEALMNIQKFWSSFVALLIGYVISMLTLLAERWHFKHIVMKHP  
MYDVYNPSLYNFKRIYYPQH

>DmelIR68b

MKFLVGLLLQWYLPGIYALAEIACRIAVEQNVQVTTYLYRCASCSPASFDADYSALELDLYRCVGSRLPVITRNMEAH  
ELEPFRRTDLSIFQIPAAEKGDSLVRRIIDMLNPHQRRKHMHKYLFVWPNAGRHLQLRLFRGSAKKLLYGLAIT  
GRENGTFDFDPFAWGGLQVIQRLDGEVPYARKVKDLRGYPLRFSMFTDPLMAMPSPVETAGYQAVDGVAARVVGE  
MLNASVTYVFPEDNESYGRCLPNGNYTGVVSDIVGGHTHFAPNSRFVLDICIWPAVEVLYPYTRNLHLVVPASAIQ  
PEYLI FVRVFRRTVWYLLLVTLVVLVFWVMQRLQRRIPRRGVIQFQATWYEILEMFGKTHVGEPAGRLSSFSM  
RTFLMGWILFSYVLSTIYFAKLESGFVRPSYEEQVDRVDDLVLHLDVHIYAVTMTYDAVRSALTEHQYGLLENRSRQ  
LPLGIATSYYPVVRDRRAAFIMRDFHARDFLAITYDSQAERPAYHIAREYLRSMICTIYILPRGSPFLHRLES  
YSGFLEHGFHEHWRQMDLITRVGASPDAAEFLEDLGDQTDTSGGSNELAIRNKKVVLTLDLIQGAFYLSVVGIGIS  
CLGFAVEHAHWFRRTLRNAVEARTS

>DmelIR85a

MSIQWLKHILLAILVNLAGTRENHPLDLKKSSIVMVKMSQILCKARIKVLVYFENQTSHEHTGQILKEVTKCD  
ISNQNTPLEAVKDDGIIMYMVMITTNISQPLELSLIRKSSAAKHRSHVFLVRDADTVSDAWMRASFRQFWKIWLL  
NIVILYWRDGRNLNAYRNPFDNYLIPVDNKPNEVPTLEQLFPKTI PNMQRKPLRMC IYKDDVRAIFWRQGTILGT  
DGLLAAYVAERLNATMMITRPHSYNNHNLSSDICFLEVAKEYVDVAMNIRFLVPDTRFKQAESTVSHTRDDL CVIV  
PKAKTAPTFWNI FRSFGLVWALILVSVLVANVFCYILKSEVGRVPMQLFAGALTMPMTQIPPNHSIRFLFLFWLY  
FGLLICSAFKGNLTSMVMFQPYLPDINQLGALARSHYHIIIRPRHVKHIIQHFLT LGHKHESRIREQMLEVSDTQMY  
EMMRNNDIRFAYLEKYHIARFQVNSRVHMLGRPLFHLMNSCLVPFHAVYIVPYGSPYLGFLDSLIRSSHEFGFER  
YWDRIMNSAFIKSGVKVNNRRRGSGNDEPVLKLQHFHAVFALWLVGIGMACIVLAWEHLTHNYNLAVTKRRD

>DmelIR87a

MSTPEQRFWLAALLFLLSQHSEVRGFGINLMKVQTEDKGQEACILALLRKYFDSGDGLSGSVLCINRNYQLPNIEE  
QLLRGVNNYENYPWSLLITNSREGPSPAKFLMNEKPQCYFLIVDNLEDEDLDEVFEHWKGMVNNWPLAQFVVYLAS  
LEETDEEMNDLMVELLLTFINKKIFNVNVIQSEENQFYGKTVFPYHPDNNGCNRVISVELLDACDYPSEETDSE  
DENDEDEGDGAQEEDDGPEEGDGEQEEEDGPEQEDGDQAKGDEGEQENDDGLENKVENEFRI GASDDDELENDL  
SSNSSEPEAIIIEFFRAKFEDKFPRDLSCPLTASFRPWEPIYFRNSEEQPVDDYYYGLQGEDDYNDTSPNYGES  
DDESYADPGEDGDGAIPDTETQSGGKLKLSGIEYEMVQTI AERLHVS IEMQGENSNLYHLFQQLIDGEIEMI VGGI  
DEDPSISQFVSSSIYPHQDELTCVARAKRRHGFFNFVATFNADAGFLIGIFVVTCSLVVWLAQRVSGFQLRNLNG  
YFPTCLRVLGILLNQAI PAQDFPITLRQLFALSFLMGFFSNTYQSFLISTLTTPRSSYQIHTLQEIYSNKMTVMG  
TSEHVRLHNDGEIFKYIREKFQMCYNLVDCLNDAQNEHIAVAVSRQHSFYNPRIQRDRLYCDDRESLYVYLV  
MLLPKKYHLLHQINPVQHIIESGHMQWARDLDMRMIHEEITRVREDPFKALTFDQFRGAIAFSGGLLLVASCV  
FAFELCYVKYVYRTEKREKTKKITKKVHNIKI QHD

>DmelIR94a

MALPKQLKFINIFLVLLIIYGSSDGTEHQHEIFLNRLLQAVHNERSVETLFLHHSNLANCSLQDWNPPRIPTIRS  
NELTVFNVEKTFNHNALALVCLMKNSYREILNTLAKSFDCMRQERIILMIHRKSDSKFIEDITHEVKNLQFLHLIV  
LIVQEYNGQVFASTLRLQSFPEPHFKRIRNVFAIQIRIFYRPINFHGKVLNAIPNDIPILFVALNEMFTEYARRYN  
STLRIQNRTIKEDIETEDNYDIDMKIQLHNSQNFLHNMNIAMDIGSNLSIILVPCATELRGLDIFKELGVRTLW  
LALLFYIIFVLVEMLFVVISNRFNGRNFTMYRYTNPLINLRRAVAILGQTSPISNRYSLSIQHFFVFMSLFGTLFGG  
FFDCKLRSFLTKRPYYSQIENFSELKSGVTVVVDHTTRQFIEQEINANFFRDEVPNVRTTTIQELINHVSYDRK  
FAFVANSIPWRTFREEMKSINQKILCDSKNLTILENVPLTFSIRRNAIFSHHLRNFIINAADSGMITCWFKMAGKV  
IRKHIKTTLRESEQQPSHLPLSFDHFKWLWAVLCIAYVMSFMVFMVMEILWSKYQRRTRSVSIV

>DmelIR94b

MSLIFNLLFILILSQAVSQETEFQLKYLNNIVRSMIKLHKMETLVIVKHHLDNNSCLQNNWAHMGMIIRTNDQ GK  
LIMKDTFNSRTLAIICIGQNSHITLLRNVFETFGKVQKKIILWTQMELKEKFFQEISKKSRLDKLLNLLVLKAVT  
KDKLLIYRLNPFPSPHFKRIENIWPNDTLFMDTKFNFGMTAVVKHDYNWTIQMGNIRKFPISRIEDKEVIEFAL  
KYNLTQLQFNDVERFDIELRKRIILKSNSTQPIDSGIPMVFSLLIVVPCGNYLSIQDVIKVGSGIEKWIFYIILVY  
VIFVLIEITFLGVITILSRQSRHQMPNTLVNLCAFRATLGLPFPETRRTSLSLRQLFLATALFGMIFSI FINCKL  
SSMLTNP CPRPQVNNFEELKTSGLTVMDHDAENFIEKEIGVDFNQYMPRKVTLTFTTERAKLLFSLKGNHAFTLF  
SESFAIESYQRSKGLRAHCTSEDLI VAERV PRIYILENNSILDRPLRRFIRQM QESGITNHWLKNIPSSLEKNLM  
QITIPYDRERVHPLSIEHLTWLWCILILGYSISMIVFFVEMSLKRRKKNLNENRAPNICIC

>DmelIR94c

MSKVFKLLVLPLIYLSLTGSKNPKLFLRELINVIEEGREIRTIMVIKHSRDEYCHLDQWNPRGSPILRTNEMGS  
IRISGYFNDQAVILACMGENDYGLLKSANAMDNMRQERIILWSEREPTKMLMDYISQQADRYNFAQIIIVTMNE  
DVDAVPSLHLQNPYPTRPRFRQITNISNIRRTSFFGCGLSFQGKTAILKESVVSNI RFKVVSPSGPIPLSELKDYEI

VQFAVKYNLSLKLVDQNESKSDHFDIQLGFLFITKDFPTQMAFVSPNTACSLIVIVPCSPKWRFMVDVLHKLGLVCLKL  
IGCLLIAYAVFVLIETLILWLTHRISGREVRLTSLNQLLNPRAFRGILGLPFPEFRSSISLRQLFLVISVFGLVY  
SNFVSCITLSALLTKPAQNQPVRNFKELRDSGLITIMDKYTHSFIEKHIDPEFFDHVLPHYLILQKKEALRMIWNFN  
DSYSYVMYTTTWKSLNTVQKSFDERVFCESESLTIAWNLPRMYVLGNNSVLKMWLSRYITYMPQTGIPDSWTEQLP  
KVLKLLYNVTSPRRIKEGAVPLSIQHLSWIWHLLFIGESIATLVFIVEILLQKSNQHTSNMRERSSD  
DDFV

>DmelIR94d

MGQLHLLLVALVLLSPGGDSFYHSLIHHLNRELKIEYVLLLGNFDTTWLDILWQLPVSVLQIKEHSRETYSLLENP  
SHNVLTIAFVNDSPEDILEILYRNLRLMNTQPVLLVIRKSTIRVNSLLEWCWHHQLLKVVAIAQDFMESLIVYSYN  
PFPVLQFIERRLDNSTVIFEKRLLENLHGYEVPIALGGSSPRLIVYRDLEGKLIFSGPVGNFMKSFEQRYNCRLVQP  
YPFDESAISPARDLIASVQNGSVQIALGAIYPQVPYTGYSYPIELMSWCLMMPVPEEVPHSQLYSMVFSMPAFGIT  
IVAMVLISLTLSMALRLHGYRVSFSEYFLHDSCLRGVLSQSIFYEVLAPALIKAMYLVICLLGLLITSWNSYFST  
FVTSAPRFPQLTSYESIRHSNIKIVIWKPEYEMLLFFSENMEKYSSIFQLQEDYKEFLHLRDSFDTRYGYMPPMEK  
WSLMKEQQRVFSPLSLQDDLCVFHTVPIVFPVMKNSIFKEFPDRILIDVTATGLLSRWRDMSFTEMIKAGQLGL  
EDRGHPKEFRAMKVGDLIQIWRFGVMWGLATIVFLELICFWRHKMWQNMKYMFCRNKNI

>DmelIR94e

MDCPKWILSGLCLISLVSGATVIELLGTCLKLELDFEYVLLMKNRNFSLSDQVWNGTSLTKDVMDEVQVPVLQFNEN  
VSYFLHNSISRRDLIASVQNGSVQIALGAIYPQVPYTGYSYPIELMSWCLMMPVPEEVPHSQLYSMVFSMPAFGIT  
IFQDFETTSTFYSSNFPILQIEERIYETSLQTLPIFPDRLRLHGYEMPVILGGTAPRMIAIYRNKKGNVVDGTGTV  
GHFMTAFQKYNVVKFVQPLQAKNPLDFAPSMQTVGAVRNETVEISISLTFPTIPFGFSYPYEQMNCVMPLVEAD  
VPPFEYTRVFELAAFLTLGLTLVLISCLLASALSHGYATNISEFLLHDSCLRGVLGQSFEVFRAPTIVRGTYL  
EICVLGILITAWNSYFSSYVTSAPKQPPFRTYDDILASKLKVVAWKPEYAEVLGRLLFERKYETMFLVEDPFRNY  
LALRDTLDTRYGYMITTNRWVLINEQQKVSFRPLFQKRDDFCFFNNIPFGFPLHENSVMFEPVQKLIMELAEATGLY  
YHWITTFGSELIDAGEMHFVDLSPHREFRAMQIQDLQYVWYGYAFMVVLSLWVLLLENLAYTVKSKTIFPTHFMQR  
NKK

>DmelIR94f

MSGMWQQVLLAETSNNWFRSDVLQRFWTHLRVEIRFRTMLNRYLESDCDWFNVLGSDNSTALLWNDQTYPHYLRRR  
QDTDILVVVSLRFHQYQEVLLALSLMLDQMRSMPPVVLQCGDEDSMQELNSARLLLLKHSQDLKMPNVVLLSTFFT  
SATLYSYEMFPEFNVQKLKYAYLTLFPYKLGNLKGHPIRTVPDNSEPLTIVRKTNGSIAIDGLVWQFMIEFAKH  
INATLQLPIEPHPEKSIKLVQILDVLRNQTVDIAASLRPYSLNVRSSSTHIYGSPPMVGNWCMMLPTERVIGSHEA  
LTRLMKSPWTWLIILLFYSVHRFLAQKTRLRSSLIHLIKLLINLSLICFLQAQLSAYFIGPQKVNHI SNMQQVEES  
GLKIRGMRGEFMEYPIDMRSRYASSFLLHDLFFDLAQYRNSLNTSYGYTVTSVKWELYKEAQRHFRPLFRYSEEI  
CVQKLSLFSLIQQSNCIYCYRSRIFILRMHEAGLIRLWYRRSYVMVMTAGRFPIGDLSTVHRAQPIRWTEWQNVVL  
LHGVGLLFSSVVVFVIELTVHYANVCLNLL

>DmelIR94g

MSTAVNSVHSLVSLISRGQELTISIFFYAPAKEKCHLEDTISSATWGLPLVIWRTDRTVILNGFIGEGLLVLACL  
GFHWRALLGSLARSCLKYLRQARILIELMQDRDEFVLVSEVLQFCLSQDMINVNAIFDDFPETENLSSFEAYPSFEV  
NQTFTPDTPQVSDLYPNKMLNLRGGVIRTMPDYSEPNTILYQDKEGKELILGYLWDLLEAYAHKHNAQLQVUNKYAD  
DRPLNFIELLDAAQSGIDV GASIQPMSMGSLSRMHMSYPVNQASWCTMLPVERQLHVSELLTRVIPPYPTLALLL  
LLWIFYEVLGRWRHRSRLQSIGWLVLATLVSSNYVGKLLNLFDTDPSPPLPVNSLAALMESPVRIISIRSEYSAIE  
FTQRTKYSAAFHLALHASILIGLRNAFNNTSYGYTITSEKWKIYEEQQKRSSKPVFRYSKDLCFYEMI PFGLV  
IPENSPHRAPLHSYTLRLRQAGLHDFWVNRGFSYVMKAGKINF TAVGERYEAKTLTITDLRNVFI IYVSVLLISLILFTC  
ELFVSWVN

YWLGF

>DmelIR94h

MLSNISFSAPELVDLYGLVLKFLVSSETTLFYFNPTGQKCSWETLPRITLSNHPQIIWFREETYPGLYKRHSSNL  
FVMACLSSTSYDGQLQLLAESLTRYRSVRVLIIEVQDKEGSFLASQILLCCQHSMLNVVLYFSRWTRTLNVFSYLA  
FPYFKLLKQRLSGSLRPKIFINQLKDLQGYKIRVQPDLSPPNSFSYRDRHGECQVGGFLWRIVENFSKSLKGD  
TQVLYPTWAKAKVSAAEYMIQFTRNGSSDIGVTTTMITFKHEERYRDYSYPMYDISWCTMLPVEKPLSVEILFSH  
VLSPGSALLLILAFILFFLIIVPQLIKCLGITFRGRILIGMASRIFALVMLCSSSAQLLSLLMSPPLHTRIKSF  
DILLTSGLKIFGIRSELYFLDGGFRAKYASAFHLTENPNELYDNRYFNNTSWAYTITSVKWNVIEAQRHFAHPVFRY  
STDLCSSETPWGLLIAPESFYREPLQHFTLTKINQAGLITQWMTQSFHEMVRAGRMTIKDYSRTNLMKPLRIQDL  
RKCVWIFAVGLGTSTVVFTEILLIYTNVFLNSL

>DmelIR100a

MATTLQLIMLALVGGTLGQANNTDHKQVLTSIVKQLEGGLELHLRTSEDGGNDLVQFLMQEKSSIIISAKQEEVPS  
RAKIMRHHFFIFDGVBHQMEIRTSLFNTDGFYILALENNTIEDDVLLMEFAADVWLQHGHSRIYVQLSKKS  
VLLFPFLQRLVVVQDSTYSRIYKDLLEGYHLRIYIFDSVYSSVIGDGENKVL SVTGADAKLAKTVARQLNFTAD  
FVWPDDEFFGGR LANGEYSGGVGRAHRGEVDIIIFAGFFIKDYLTHIQFSAAVYMDCLYVKKQARIPQSILPLFAV  
HMDVWLCFLLVGLLGALVWLI LRAVNLI LGIEGVPDGSRAIRISYFGAARRIFVDTWVIWVRVNVGRFP  
PFHSEIRFVASLCLVSVIFGALLESSLATVYIRPLYRDVNTLRELDESQPIYIKHPAFKDDLFGYHNSEVYRRLDAK  
MMLVAEGEERLIEMVSKRGGFAGVTRSASLQLSDIRYVMTKKVHKIPECCKNYHIAVVLPRPSPYLEEVNRI  
VLRLVAGGIVGLWTGEAKERAKWSIQRFPEYLAELDVGRWKVLTLSDVQLAFYALTIGCLLSAIVCMAEILLGRQ  
RLHSPK

>HarmiGluR1

MVFNTFYATRYTGVLNNAVILSAQPPFAVEKIAVGAI FQNTTEEIQNVFKYAMT IHNQNISSRRLELQAYVDVINT  
ADAFKLSRLICNQFARGVFAMLGAVTPESFDTLHSYTNTFQMPFVTPWFPEKVI PPSSGLIDHAVSMRPDYHKAIV  
DTILYGYWKEI IYMYDSHDGLLRLQQLYQTMQPGRTAFRIALVKRINNASDAIEFLLALEQYDRWGNKRIVLDCNA  
KNAKSILVEHVRKVQLGRRTYHYMLSGLVMDHDWENEVEYGA VNI TGFRIVDHSRKIVRDFMDGLRRMDPRFKGT  
ISAETALMYDGVQVLM DALGRLWRKKPDAFRSALRRAGQANSTKVIDCNP GKS WVVPFEHGDKISR LIKKT  
DIEG

LTGNISFNEEGHRHNFTLHVEMTVQSAMLKVATWSDAHGLQVATPRYVQLRSPASYDTNKNYIVTSFLEEPYLMQ  
KPIEFQGKEELFGFCCKDLMDVIAKKMGIKYKLLKLSNDANYASDALPDIHSGVVGIEVRKEADIAIAPFAVTPERER  
LVDFSEPFLLTLDTPAIYTRTPRQLSDTFSFLRPLSKEIWLCVLFSFFAVSIVLFLVSRFSPHEWKSVSISDTQLDH  
TMSSTSEIILHNEFSIWNSFWFSLGSMQOGSDVVPRLSGRIVGTVWWFFALILVCSYTANLAAYLIVERIAEPA  
LSTVSYSPNIAHTESSLNFRNNFVKDPVLNNEEASAYSDDGEACGSPSRVCYKXHVNFAPATAKGSPLREAINLAI  
VNLKKEDFITKLWRKWATYNKKPDCEMIKDEETTITEMTLSQVAGIFYVLVGGLALALGVALVEFCQHGRAEAARA  
NVPLRAALRAKARLASRTERKTPPQRTQGDHERLGNWGAAGAGYFTSGTQISQEDAVHASFTHV

>HarmiGluR2

MSRLLLKWLAATLCLLRVHGDRTLGAIFDDGTFLLEAAFNVAIAAASEDQENPFVANVIKTSPSDITEAENAMCTL  
LESNVFGVFGPTKKGSLQHIQSIADYLEIPIIITDPVETQNRNWSVINLFPHHLAYSQLFADLIELKGWTDFTIY  
EGAELLFFDSILSMQDLDTGQKILIKIVQLPDGDDFRSQLKFIKKSGSVNYIINCRRETLPVLMEQAQGMDS  
EHSYLMNPDPFQTIDIDPFKHGGSSITGIRMFDPSSLESIQNFITSLNEKVAELSENEIENAIENGLTLDLALVYD  
AVTLFVSTLNAMSLEEGSNVTCDDAESWGFGSSIVNYARTMEVDGLTGIIKFDEGDGRSEIEIDVLEIMSYGLDKV  
GTWTLEDGFVETKDNVSPAEGEGSESMKGKHFVLTALSAPYGMLESKKLEGNDRYEGFGIELIDELAKINEFN  
YTFDIQEDGVYGSYDKKTGKWNMGMEKIMDGRADFATDLTITAARQKAVDFTSPFMNLGITILYKKPTKEPPDLF  
SFISPFSGMVWGLAGAFVGVSCLLFILGRLAPEEWQNPYPCIEEPETLDNQFTLANSFWFTLGSVLTQGSSEIPI  
AVSTRMAGSMWWFFTLIMVSSYTANLAAFLTVESKFYAIKSVNDLASNPYGMTYGAKKGGATSFFFKESDNLLYQK  
MYHYMEDHPQLQTATLNQGLDRVKSDSENYAFLMESTSEIYMVVERNCDVAQVGGLLDSKGYGIAMKKNSPYRQPM  
ESILQLQEEGKLTRMKDKWWEKRGGGACADDDAGGGEAQLPLVLANVGGVFIVLAAGSGMAVVCASFVEMVFDVWMI  
SRKMKVSFREELKAELKFILSFSGDTKPVHRHRESTGSGSGGSKDDGEKNADAESPDDDDRADPSPTPRSERSGHSH  
HTLHSRRQSNNAVQMAKMRKYSLSRAM

>HarmiGluR3

MWPGWRWVLMVNAVALSPVVKIGAVFTEDARGGSTELAFKYAVYRINKERLLLPNSTLVYDIQYTPSRDTFKTY  
KKACAQIQSGAVALVSGVGPLLGNTLQHMSASLHAPHLTVGPFAPENLNNTFTINLYPPKDLLTKAFAEFLSYLW  
TRMGVIYEDYGYGELNILDIAKDGDRMYAVRCRAKEYRRGLALLKAQQIEHIVVDTPKRVRLARAILQLQMNN  
ENYHYVFTSFDFELFDMEDFYNRVNMMSGWRLVDRHSDKVKESLQVMEKFHPIGASIIISGGHIKTEPALLYDAVQI  
LCQALAITEDIHPGNVSCDKDTPSLHGKAIYDNINTIQAHLGTGPLEFKQGIKKNFHLQLMRLTGGEKGMVVS  
WSPAEGLAITDPAAYTRDPPPNVTLTVVTVEEKPYVMVKEGWNLQGNARFEGFCIDLLARVAARAGFHYRLRLVPD  
NMYGARDPDTGHWNGIVRELMRKAIDAVASMTINYAREAVIDFTKPFMNLGIGILFKVPTSQPTRLFSFLNPLAI  
EIWLVLAAAYILVSFTFLVMAFSPYEWSTSTHVCGHETKLLTNQFSVCNSFWFITGTFLRQSGSLNPKATSTRIV  
GGIYVFFTLIILSSYTANLAAFLTVERTVLP IQSAADLAAQHIIHYGTNLGGSTMSFFRDSNIDIYQKMWEHMSA  
SPPALVSSYEEGVRRVLAGNYAFLMESTMLDHRVQRDCNLTQIGGLLDSKGYGIATWKGSPWRDKISLAILELQEK  
GVIQILYDKWKWNTGDVCNRDGKDSKANPLGVQNIIGGVFVTLTLLCGLALAIVVAILEFCWNTKKNASQGRQSLCSEM  
GQELRTAMRGSSSRTVLRPGCSRCSPPATHVPPATSRYQHSRSSSVELKELRWS

>HarmiGluR4

MRGANAIFLILFFGHLSALPDTIRIGGLFHPPEDEKQEVAFRYAVERVNADRAVLPRAKLLAQVETISPDQSFHASK  
RVCHLIRSGVAARFGPQSAPAAAHVQISCDTMEPLPHLETRWDYRTRRESCLVNLYPHPAALSRAYVDLVRAGWRS  
FTIVYENSQADVRLQELLKAHGPSELPAVRQLPDSHDYRPLLKQIKNSAESHIVLDCCTTERIRDVLQQAQIGMM  
SDYHSYLTISDLHSDVLEEFKYGGTNTALRLLDPERADVQRVVRDWWYDEARKGRKLQLGHTTAKENMTFIKTE  
TALMYDAVHLFAKALHDLDTSQQIDVRPLSCEAEDTWPBGYSILINYMKIVEMKGLTGVIKFDHQGFRSDFTLDIE  
LTRDGLQKAGTWNSSSEGVNYTRSYGENQKQIVEILQNKTLIVTTILSSPYCMRREASEKLTGNAQFEGYAIIDLIE  
ISKILGFNYTFKLAPDGRYGSYNRETKEWDGMIRELLEQRADLAIADLTITYDREQVVDFTMPFMNLGISVLIRKP  
IKQPPNLSFSLSPSLDVWIYMATAYLGVSLLFILARFSPYEWDSPRNCLDEPPVLENQFTLLNSLWFTIGSLMQ  
QGSDIAPKAVSTRMVAGMWWFFTLIMISSYTANLAAFLTVERMDSPIESAEDLAKQTKIKYALKGGSTAFFRDS  
NFSTYQRMWSFMESARPSVFATSNKEGSEERVVRGKAYAYLMESTTIEYVVERNCDLTQVGGMLDSKGYGIAMPPN  
SPYRTAISGAVLKLQEEGKLHILKTKWWKEKRGGGSCRDETSKSSSTANELGLANVGGVFVVLMMGMGVACVIAVC  
EFVWKSRRKAVDERKEEASLCSEMAELRSALKCPGGGAGGGGGGGPGGARDGAGSPYLHYGFSTKSQHLH

>HarmiGluR5

MAKNKGTRMWSYHVFLAVVYCGGQLVTADIDRRRFSNPTYYNVGGVLSSNESIAFFKDTISNLNFKDQYVPRGVTY  
HDYSMLMDPNPIKTALNVCKDLIAHRVYAVVVSHPLTGDLSPAASVYSYSGFYHIPVIGISSRDSAFSDKNIHVSFL  
RTVPPYSHQADVVDVLKHFNYMKVIFIHSSDIDGRAILGRFQTTQSVDVDRKVVVEQVIEFEPGLDSFSDRL  
MDVKGQAQARVFLMYASKTDAEIIIFRDATFLNMTTVGIVVMVTEQALDAANAPEGLLGLRLVNATNEHAHIQDSIYV  
LASAIRDMNTSEEIHAPPSDCDNGSIWTTGRLLFDYVRKQRLENGATGHVAFDDHGDVHAEDMVNVRAQGEHV  
AVGKYFYSKETQKMRLELKEQEIIWMGRSTSKPEGFMIPTHLKVLTIEEKPFFVYSRRIDDGSECTPEEIPCPHYNA  
SEDTDQLYCCKGFCMDLLKHLASKAINFTYSLALSPDGQGFNYIIRNFSQPAGKEWTGLIGELVYERADMIVAPLT  
INPERAEFIEFSKPFKYQGITILEKKPSRSSTLVSFLLQPFSSNTLWILVMVSVHVVALVLYLLDRFSPFGRFKLANI  
DGTEEDALNLSAIWFAWGVLLNSGIGEGTPRSFSARVLGMVWAGFAMIVASYTANLAAFLVLERPKTKLTGIND  
ARLNTMENLTCATVKGSAVDMYFRRQVELSNMYRTMEANNYDNAEQAIEDVKNGKLMFAIWDSSRLEFEAAQDCE  
LVTAGELFGRSGYGVGLQKGSWADLVTLAILDFHESGIMESLDNLWILRNMLNCEENEKTPNTLGLKNMAGVFI  
LVLAGIIGGIVLIVIEVVYKRHQIRKQKRMEIARHAADRWRGAVEKRKTLRAAILPSQRRAKSNGVKEAGSISLAV  
ERGARRDEPRVPRYLPAYTPDVSHLVV

>HarmiGluR6

MHVLPVLLLVCSVQCVSAQEGPPIGGIFYKDSSEDMKAALVSAKSFNFTASIKEVSTRGEVLEISKYVCQLAEEGV  
IGIIDGTGGRSSEIIQGLCDALELPHISIEHNDLYSDWVFLNMYPSPPTAYNMVLQKLIHKEWKNFTLLYTKGHS  
LIRVSELLQMGNDTLVVSLRELSGSDYRDVLIDAKHNGYKNFVVDSPSRYLEQVLLHAQQVGMMAEEHSYIFVSPD  
LFTLDMRSFKYGGVNMTGFRLVELQDKDNEKLWNFTSTLNLETGKTFKPEQLKTQVLLIHDAVEVFAAAFKKVKVQ  
PEALSCDNYQAWSFGSTLLNFMKTNKVEGLTRSLIFDGVGQRTDITFNILELTSAGNQSIGNWTNNELKINRPLVA  
DAEITQESALRNKSLRVLISLAPPYGYMRKSDKKLEGNDQYEGFTIDLIDKLSEILGFSYEFAVEDDYGTKTESGE

WTGMALQLREERADLAICDLTITAVRQSGIDFSTPFMTLIGIGILYKEPSKQPPEMF5FMAVFSKEVWYYMMLIQLA  
LGATMIFVGRISNKEWQNPVPCIESPEELNNQFSFANSVWLIIGSVMQQGEIAPIAIGPRMITSVWFFFTVMVA  
SYVGTLVAFLTVEKNVLPFETVQELYESKSITYGAKEKGSTKQFFENSTNPIYQAMFKMKAHNWLAKENDIGVYW  
AETQNYAFFMESTSLEYKERHCDLLQVGGLLDSKSYGIMKKKSPYKKYIDDALLKLKENGIEKLRNIWWKEKR  
GGKCGEKRDADQKQLGMKNMLGAFVVLGVGCLIGLFIISIDMLWGVFKRSVKYSTTFKYELIIBELKFALKFSGHI  
KPVKRPQKAIDGSFEALAKAEGKDDIRSLHSIRSCDTHRTHSHSSRHSRSLSVAFAKRRSYS

>HarmiGluR7

MCWYLLVLLLLCVQKCTPQFVYTEMTEISYQIVGIFEKDATIQMAAFNDSLNVHVQEVITIRPATLQPRRTDSYSVW  
RELCSNNAIQAVAVFGPQNPIITDGAIRDQCAIANIPIHIQATWQSMDDPLELNEETTAQEEGEDEESEIPFKKISIN  
FYPDSEETALAYGKLLQYYKWGGFAALYEDNFGLLRVQKILAEVSLQSQIFMYKLDPKGDNRRIFKALRKQVSRF  
LLDCHSDHILRYLGEADNAKLVSSEYQHFLVLSMDTSTVAESLIKMP5NITWLSITQYDKLKDGGHYLATRVGNWRS  
NEESPSVVQFKLDSLIMDDVASHLVKALDVKDIAQPPVFSCTGDEEPWAHGAAYQKKILKTQSYGVTGNVEFDQRG  
RRINYVLYINEIHIRDQRTIGRWESATGMINETKRLDSSAANQSSKEFVVISRRAKPYFSFKEKCEKTECKDDDR  
FEGFSVDLVDNIFRILREEKYNITYRFIHDYDMEYGKVDPTTHTWTGLVGILLDKKADLAVCDLTITEERKKVVD  
SVPFMSLGISILYTQDRKVQPGMFSFLNPYTFEVMMHTATAYCVVSVLFIICARISPADWENPEPCEKDPELENI  
WTFKNCAWLTMG5IMTQGCIDLKPAIGTRWVCGMWWFFAVIVCQTYIAQLSASMTSALENEPINSVDDLAQTKIR  
YGAIVGGSTLEFFKASKDKTYRHM5YETMAANPAVLVTSNDEGEERVLSKNTYAFFMESSTIEYKLKRNCCLKKVG  
GELDSKDYGIAMPANSPFRTDINRAILRLKELTTLDKIKNKWWHEKYGAQKCEPTVDENDIEGDLEMENLMGAFV  
LVVGLVFCLFITAEIEMNEVRNIVVREQVTHKEVFIKELKASLNFQQLQKPVLRNPSRAPSIASSDSDERRENQAK  
AIENFMNLEKAV

>HarmiGluR8

RTSPAPPPPRAPSSITAALVVPHKAFGTRDYTKAEKAALS5KLPRKLKLF5HVRNLNITLSTQGLTPSPMSILDSLCK  
EFLAVNVSAI5LYLMNHEQYGRSTASAQYFLQLAGYLGIPVIAWNADNSGLEKRASHASLRLQLAP5IEHQTSAMLS  
ILERYKWHQFSVVT5SAIAGHDDFIQAVRERV5TALQDRFKFTILN5AIVVKRSSDLNELVTSEARVMLLYATREEAAE  
IL5AAGDLHLTG5ENFVWIVTQSVLGS5MQPNKFPVGM5LVGHFDTSS5SLIAE5IATAVKVFAYGV5ESYVSEPNIRY  
PLGTRLS5CSGAGAGEAR5WSTGERFYRHLRNV5VEGEAGRPSIEFTPDGELKAAELKIMNLRPALGEQLVWEEIGTW  
NSYPRERLI5IKDIVWPGGLHTPPQGVPEKFHMRIT5FLEEPPYINLAPPDPVSGRCSLDRGVI5CRVAPEVEVAGLEA  
GAAHGNS5SLYQCCSGFCIDLLQQLAEQLGFTYELVRVEDGRWGTLHHGKWNGLIADLVNKKTDMVLTSLI5NSDRE  
AVVDFSVPFMETGVAIVVAKRTGI5ISPTAFLEPFDTASWMLVGAVAIQAATFSIFFFEWLSPSGFDCSTGNNSKRV  
PQNRFSLCRTY5VIVWAVL5FQASVHVDSPRGFTARFMTNMWAMFAV5VFLAIYTANLAAFMITREEYHEL5GLDDPRI  
ARPLTQRPPLK5FTVPWSHTDATALAKYFTEPHAYMAR5YNRSTV5AGVTCVLTGELDAFI5YDGTVL5DLV5QDEDCR  
LLTVGAWYAMSGYGLAFTRNSKYVSMFNKRL5LDL5RANGDLERLRRY5WMTGTCKPNKQEHKSSDPLALEQFLSAFLL  
LMAGILLAALLL5LLEHVYFRYLR5SHLAASSAGSCCALV5LSMGQSLTFHGAVVEAAARGFGERSHCRSAVCAAQVW  
RARHERDMAVARARQLA

>HarmiGluR9

MATRDGTRDLKLLSKNTSDSGEAGAPHAAQT5TYCIHKPTASTMITLKAFIIAISTVCLFIHNSHALRLTAPPIG  
GLFNRETL5PSSLQVFSNMIEANRMT5YHGRSLVSKVDSYST5LELCPFT5EDRGIVALIDARPTYGICDITCLLC  
NRLNIT5HLSL5GWEPTD5TQSEDF5SFAYYPPPEMISKAYATLI5KDLG5FDKFTILYEDDGSFIRLTQVL5LV5QDEDCR  
ILFRKLD5PYGDNRETFKYIFKVARMSYHVLDCNITNIHKYMNEIVQVENATEFQSFILTNL5DAYS5LDFKAI5DDLMA  
NVSTLH5LTT5PSEATWKDKGMLGARAF5GLETALAADALSHLEKAI5RSLQLT5TDNL5DPPPLCQKSTRSEYEESAWPL  
GYDLREALIK5TTT5KGFSGHIEFD5SEGRRTN5FMLHYSKLDKESQFVYAGWDYKTNVITKKDHVDDRSLAL5KPGSKI  
RVVTKTGSPYF5SVVDTP5EGKVYRGYCVDLIDAIFKYIKETRKEHF5EYEFYIAPGNEYGNQIEGTNKWTGIIGELMD  
HKAHLGICDLTIT5SERN5VLD5F5IPFMTL5GISL5LFREEDPEAPDRF5FIKPLSL5DVWLYLAT5TYVIV5SFVLLVCAR  
MSQDDW5NPHPCN5PENLENI5WSLYNCM5WLT5MG5IMTQ5CDILPRAAGSRWIAGVW5FFALIVT5YANM5STFL  
SNSRR5NVINDVKEL5SEQNKISYGAVYNGSTYRFFQTSNDTV5SKIWSVMNAAKPTVFTT5NLE5GKDRVTR5NGKY  
AFFMEST5SIEYYIKRNC5TLKMLGSKLDSKEYGIAMPKNY5GFKGKIDHAIL5SLQELGELEK5LKKK5WWEDEDN5QEHCE  
KIVKEEDD5N5GLQMKNT5GIFLVLGTG5ILGLIVAIIDFMF5HARQISVKEK5VTFKEALSSEWHASLNP5RELHKPTA  
PPRSAP5STAS5PSPQ5RERSQ5RAVS5LRAASSFINF5DETY

>HarmiGluR10

MLLRGVYVTVVTIILILGNVGAVLRKFETLKT5TVNIGAI5FPNPTVAE5VAFASALARASMESEHYHFVMKAV5SPYG  
DSFAASKAACELL5SGGVI5AVFGPTDPV5ASAVEAH5CRAARVPHI5QAVWR5PP5VRGEQQ5PSPGINLYPEAVALSKA  
VALFID5DSDWRSY5TLLYDDDHGLIRLQ5EVLKHTN5PEVKWLVRRLVP5GEDNR5PLLKSLKGTGETRV5ILD5CPADRVLE  
YLRQANEV5KFFEDYMSYVLM5SLDAHTLD5EELRYGLSNV5TCLRIFDH5DSR5TRAYLADWKVRG5SDDVKIPRQSYEI  
TVEAALASDAARLITDAVENAPEEFKLEAQEISCD5SEDQWESGEDFTN5HLLTNPIV5GITN5KINL5DNTTGERMNF5SV  
EIMEL5NSG5FNSIAKWN5PEVGF5EYGR5SADETS5DLAEKWQNK5TFKV5SRIGAPFLVEVVPKEGETLTGNDRYEGYS  
KDLIHEILKELL5HLN5YEIEIVPGNGYGSYNKETKKWDGLVG5HLLERKADLAI5CDLTIT5YERR5SVDF5T5PFMTLGI  
SILYLKPT5PEPEL5F5FLKPF5SDV5WIIYMAAA5YLMV5LL5HLILARLAPNDWENPHPCDK5PEELENI5WIIKNSCWL  
TMGSIMTQ5GD5ILPKGYSTRWVCGMWWFFGLIMC5SYTANLAA5FLTNAAM5D5SIKSAEDLAMQ5SKI5KYGT5LIGGST  
YSFFKRSNV5IYQRM5YGAMESARPSVYVKNNDEGLERVLK5GRDYAYFMESTAIEYQLERHCELMQVGGLLDSKGY  
GIAMPFD5SYRTAVDNALLKLAESGKLVEIKNRWWKAPPEKACVTEE5E5E5GAAGELGVENVGGVFVVLGTGCGMA  
AAMGIFEFLWNVREVAVEQKMTQSEAFWAELTFALSFWTEKPVKHSR5PSS5SASESQGASRASSVLR5AADL5FHL5D  
VFK

>HarmiGluR11

MMALKFILLNTFYKILL5SYLAIYCNNIEV5SSQIPMADKIPIGV5VDQNT5EEIQNAFKFAMLQHSNANK5SSLDFQLY  
VDIINTADAFKLSRLICNQFARSV5VAMLGAVAPDSFD5TLHSYANTFQMPFVTPWFPEKVI5PPSSGLNDYAV5SMRPD  
YHRAVMATITHYGWKNV5IYID5SHDGLLRLQQLYQSLQPGNATFRISNVKRV5NASDVVEYLRAIEKLD5RWSNKYV  
VLD5TTQLAKATLILHVRDVQLGRRNYHYFL5SGLVL5DDRWEKEVTEFGAINITGFRLLD5FSRKIVRDFIDVWRRET  
ISAQAALTYDAVQVLIDAVLRLMRKKPDILRATLRRASQNN5SKIMDCNPKNKLIPFEHGEKISRMIKKTEVDGITG



SIRFNEQGHKRNFNTLQVMEMTVDGDIVKVATWCENKGLIPVIPKLDHPAVPGSYDRNKTYIVTTIEEPPIIREDP  
EDPEFRDEPFKGFACDLTKMISEKLEINYEIKIVRDGKYGNEDPKVLGGWDGMIGELIRKEADIAIAPLTVTLER  
ESVIDFSKPFSLFNLKPNVASNSTGAIFSFLQPLSMEIWLISIVCSLFAVSVVLFIVSRFSPYEWVRVVSFTDSHITE  
HSDLATTKTTVVNEFSFWNSMWFSLGSMQOGSDINPRSVSGRIVGCVWVFFALIVISSYTANLASYLTLRSISEP  
SQTYSKVAMCPEDTVDGPKPTIEVPQEPVDEHGWLAFGLMDRSAEPEDKPCEMIVTLTNSGYKDFAVGVPGKSQLR  
DGVNMLQSLKEEGEIPRLVRKWFTKSECDAPDPTDIKGSSELTSQVAGLFYVVLVGGLTLMAVALFEFCKHGRAEA  
ARANVPLRAALQAKTSLSSNTERKMTQSQRGPQREHDLGWNGGAFGGQYSPATQIGQEETALHSSFTQV

>HarmiGluR12

LPLLLVDAAAPADAWEALELYPHQPVLQAQCAELCEAKGWTRAVLLHTGDARAAALLTARARPLALLARRLPADD  
DALLRNLLLVLKKSGLTNFIVWCDAACAVRVLDAQVRVGLLAERHSYIVLSLDLHTQPLHDYSHGGANVTGLRLFD  
PEAPEVVEVMEQWRKMYAERLGVAADDEGDGDSPEAEAAIAAAPTALLLAHLGTELVAEAWRRLQLPPAAPAD  
CAMGAGAFHADTLNLYLRSEEWSSSEDGAGRLVGGAVAWVEVDGARREVQLQVVELARGGRLARAGLWAPRAGLSWQR  
RDPPASDPPPDSTNRTFTVLIKASDPYVMMQESTERLTGNDRYEGFCIELIDQLARLLQFNFTFVQQEDGDYGSK  
DNVTGKWSGMLGRLMEDKNIDFAVTDLTITAERERAVDFTTFFMNLGISILFRTPKQPEPKIFALLPFSNGVWLC  
LGFAYLGTSLLLYVVGRLSHEEWQNPYPCIEPPALENQFTLANALWFNLGAVLLQGSEIAPVAYSTRAVASVWWL  
FALVITSSYTANLATLLAKKSSDQVITNVQELADNQLGIDYGAKHGGSTYTFEHSQSELYQRMFEHMRTRKMPAS  
NVEGIAKVESGKYAFLMESTSIDYLTERNCGVTKVGSLLDSKGYGIAMKKNSPYRQAMNGLLNLQEAGTLREMQH  
TWWKEKHGGGACKVSPDPPPHTPSQEPVLMMLLCVQVDEEHSEELNMSNFLGLWLVLVVGSAIGIVLSCCDLAWA  
AARRARASGRRFHTHFWEELRFVFRFEQSVKPLQGPLSGTPSSSARSEAAEAEAEAEAEAEAEPEETPEPRARSGS  
GAAGARRRRSSMHAASRLARHTNRDSATPARR

>HarmIR1.1

MHQARLRKMILIGVLFGMLQAVSGFNLDVANLAADYVKHKDLRHVCYFTCQSRYYNTILVHKLTKQSVRVSVRRID  
ESVNRDVVRAASRSTGAVGLLLDAHCRGTPLVLLEASKNKLFDAMHPWLILTNIEDADNCTDYIQQSFFQQLNLSVD  
ADIAVASYNGGDNYTLTDVYNFGTIQGNNEVNLHGSWRPETGLEIKLKGKYNNRWNFQNLTLRAISVIDQP  
FYPEMLSEMTYTAGVAAMTKITSQMLNTLKEQHNFRFNYSIAGRWIGSPKRNSTLAVTNALFWEEQDLSSTCARIF  
PKWLDWVDI IHPPTTNLQTKFYLIIPETGVGQYENRFLTPMSHGVWGCAFIAGIAC TLVLTGAAWMESRPKPGLYA  
FFSVFAAVCQQGYEDGVQLLESYSSQGRRLTLLVIGLTSMLLYNYTSSVSWLLNAAAPSIGNLDGLINSDFELI  
FEDIGYTRGWL DNSGFFYYSGFKNVKEDEL RDKKVTKAKRTVPVLQTVNTGVELLRTGKYAFHTEPYTAAQVISKT  
YEDEELCNL GALQMMLPAHVYIMAQKRSPYKEFFDWSLLRLLERGHVKAIRARFAGTMPACSGARPRALALGQAAP  
AFLMLLLCVLLSWIILAFEVLWSRVQLKKRG

>HarmIR1.2

MISYQILLVLILPCIIFGLNQNTLKLGI EYFKYRDVKFVCLLTCEKYSSWALQYSKSASTVSI AVSETSI LRSKVN  
YNRVENCLRRKTYGLGVIIDTNCEMAADALYFASQNMWLD SHHKWLLIDDDKAKLEVYNDETEIENVIYEDRNSTLI  
DILSNLNI SV DADIVVAEKGNSSYNLYEVYNYGKIQGGNLIVNEIGFWSHENGFNLNINLNGYKYRWD FQNI SM  
RMILVAQRASKNF DLES LTGP EPVPGVAIIITQTPTDILYIVAKIHNIRYVSTITDRWIGSYEKNSSKVVS TSLYFR  
EQDVSPVIRGLSTVYERIDVINPPLTSIETRYYYRIPTMGPGKFENQFLRPLSTTAWWSVIGVSTLCAGLLLLSAL  
LEQRPSVQYAVFSVASL CQQFFQDIDDSG TKRISTARKVTILVTGLSCVLLYNYTSSVSWLLNGPPPSINSL  
KELLESPL ELYIEDIGYTRSWLQSPSYFNKRNAPIEDEL RQKKVFVNKKKNAPLLEPLVQGIKMOVQKGYYAHTEV  
NSANALISRTFSQSELCELGSLQSMETLLHPC LQKHSPYKEFMTWSLMRLSEQGIVSCIQIRRSSFEVKCEGSSP  
RALALGGAAPAFILLGGYMLATVIMLVERLVFKMKHENQVK

>HarmIR2

MRTANVVKSSLDTIFII IHKILLLSAYDNADICKLVSIDL LSGITKYFYTSKKFQYKEQFKIGFLRIKESGLLNR  
LVSTDFEEPKCTKSHIIQISMQHIAIPLTILAVTSVLSTIIMVAEKIHYNRNMWPYFN

>HarmIR2.1

MALVNMNTNVTLRVATQYNCDSLNRNARTSDPHTFDPMWRETILGCMILDLLRDMYGFKIPWIAATTAACGLRQSSA  
ARDNSQPMKMYGAAAEARDSRARPTNFGCCIFFSMCYVFDNPERNVTVIGGLNNASQSYRDSVDVYSRSMTLTQDL  
AEQIYPIHALHTWKLGLLSRPGNKIFSTFYSKPFSRPVWNCLYCFGLLIIVFFYILKRWEFSVIGGWQICFYEA  
LLVVGAYCQHIPPIDPRLPSRRIAYLIFFTFVYIVYTYT SNLLSNLVNDKDHGIDL PMLADSDYVFLAVNHMMA  
IFERSQIYHYNRNISLVVKKLMRIHTVSI PDGLEAVKTGKYALLSDFITVYPYMKKIRTLNVTQARPLVAFPVKQH  
FGALGRVVVSAASAELSLDRVFVSSCCTHLETALRHV

>HarmIR7d.1

MEVRDTEVNHTLEHFVTEDPASELGILAAKVAYYNFEWRFLTIVMYNTVQAIGLNTFLMHYEKSVIVKLGRFLPAR  
RSAPQMIIFGEDASEISSTIRWTVRAKYDSNGKFIIICAHHEQECELKIFQTLQSLYMFNAVVLKTSNKTESL  
AYSYDFLSEGGCKNSVPYKVNLTDDCFNDNCFKNLYPERLSNFRKCPLIMSTIEQPPFMYLHNLTSKPTGIDG DIM  
RLVADMLNATLHLKPPYDGADSGHFANNNWTGSLGDIYNNHSHASVCSAPITSGKYGNFQISFTYYSMDIVWATRL  
PAQQAPWQKLLHPLNIYIRIILLMFICIFMNTFCKTNLFKVISKIRDVFKIAPPKYSLLFYSWVFLGVPILRT  
PERRSFVVTYVTWIWCFIMRSAYQAALMNSLKNPAYLDNLKTFQEV LKENYPFGGLDSLKEYYIDRAIYDKWKV  
VELKNLDKTLDDILEGSTDFVLASNKEFIKHHIMKYNGTKQLQIIPQKIVNSPTVVYFKKFSPLVPPMNFALRIAF  
EAGFIQRTYVRYLDHDKKLLQRLRSKQAEPLSMEHFAGCFVLLVLGWVSLTYFAVEYICGNLDDE

>HarmIR7d.2

MSNQMLYGHILTANMAISELNHFFDTNVTAGSQLGDMAAKVAIQNFDLRHATMLFFNSTLCYGEVFLQFYHYNIVI  
NRAKVLARKTTTRQFVLFASDTADIELLLDSIISFEMDNTGKFIIICESSTPKECDEQDIMVLCWNRYIVNMVFIQ  
EETEAVGFTYYPVADGICNNLKPIKLN SHNHYTKTTYGEIFRKKFRNLNFCPIIASTFIQPPYMIKNGIPTGIDG  
DLLRMLIHGMNASLKMMTPSRGTGWGFREKNGTWMGSLADVYDDL ANFSMTSAAITLTRFTDFQISSGYSTSKVVW  
VSESAQVQNVALKLLHPFEKNTRFLLIASFLLVICCAFVLKSSCW TAMCNEENQSSRSVVFYSWMICMGQAVEKLP  
TKSAYVQMTLFFIWCFLVRTAYQVYLISLKGFRFYDSQFESIDEAINAQYFPGGPPAL KDYYVDYPFVYKNWVNI  
DTQQIAPTAVNISKGMNFV LAMNIDAARVVMKTRKAKLHILPEPIIISPTVLF FKKYSP LSETVNTILHRLIAAGF  
PDKLYKIYSSTFDIVDQGSDEGETLKMSHFTACYVVLILGWIVSAIFFSLEVYFGKIYKHPS

>HarmIR7d.3

MIWVLRILVILQLMLRSCSASSNLIETAVNISTTTFNLFHTTTTVIWKQNESECVTGYLQSYPGSVVLSPWATYNDS  
KVREINETIGFKQTIYFATNLLYEYIIMELINEVIRFPPIRIFILVLENPVKSISELSESAFIEVTARNDQADLILISEN  
DAGEVSLSTFFFPYSEGLCGNYTPVFLKYGDDLWPKKFSNFYQCPIRTALLEYFPYVTVHFEKGKITSVGGYDGKIL  
MIILKLNASLEVTSAYNNVFGTYVNGTATGSIGDLATEKADILIPADILTEKRYTPTLPSHTYHTVDIRWVGPKQ  
REVYDWLKFIIIPDKTNFTYLHLVLVYILFVIVAMLVKCKPHLTSATNRILYQSFIILLGQSARFVTKSWLLNSLFLV  
LWIWFCFFFRIDYQADLVDALQTLDLLEPPFESIEEAVTKVDGYGGVEVVVDYKDTPLERNYKVIIPMNELKNYIRR  
IVEGENFILATDIALVKLLEPYVQILKKRISATGACFYMRPGWPAAKDVDDVIFSLVEAGFIENLLSDNNNHRWIV  
NRMNADDVLQPKSLSVEKLSTCFYGLGIMWLICFIILLIEIVHNNKHHNK

>HarmIR7d.4

MFVDFSKTLYFAIFFLKIFSCSALNDITQCAVEVANYNFFYRLPAVILYRDVNDKLVTDLFLKAYKGTVMIESRGVE  
PAKQVVIIVDNYQSFIIRLLSMLKPDLRGRNLLNGRVKLLIVINSNRRKLDHINGILWSYVTDVVIVTKDKQGRIA  
LYTTYYPYKNHLCQNTPEVLIGYWSRNMYSYNMYPDKMTNMHECPLYISTNKIYDQATERKIPLQTIKKAIVRLLR  
DIMNFTPIVSARDYISIDSDRAKNWSDSLNDVISGFANISTCTIPLGVDRLGLLDYSMPYFRIRIAWLAPPVAPGP  
VWRLLSPLNGYLWLILLVVTFVLVISLFPVLKLRKIKYFCHRYFKNFDKVQGAAFRVWGALLGQTIIRVAPRRFRDF  
YIVGLWLWFTFVVRNAYQSVLIGALKTDTLTGNFANLKETVDNGYNFNGGRAGIYSHFEFDPLIRDGFEIIPVVKFE  
EVFRDLIDGKKKFVLAASLEYAYAYCLAQKKENECGHVLPDSILTVPLVVMKMYSPFVRPLTTWLPRIESGLL  
EKDAVLKTSYVTTITSDPSPLTRHQTLS CFLCLGFGCLISLVILILLEIVRKKTSEYTVVKKSQLVELDRESKFVID  
F

>HarmIR8a

MSFHYLFLLIFLINLGCVLSELSLRFVFIIESQEQLDTHIEISKSLKLAESVRTDVKLDDAIVVLDRETEDES YRML  
CSSLSKGVSMIIDLSWTPWEMAEDLAAETGVPVVRTLLGSQQVLKALDEYLESRNATDAAIIESESDDVDRTLIEL  
LGASNIRVWVHAGLTRDSAKALKTMPEPSFYVIVGENGFIMDTYRRAVKEKLVRRDYRWNVLVTDYSTLELSQLV  
LPTVTLPQDPGECCKMKREDCCPNDFQRKQYILNALIQYIAEVYSKLDRLPLVTSSISCREEPAVMNSTRDLR  
YRQFAEDAEISNETLFWMDRSGFLRSRIFLSTYKPTAGQQTATWSADEBYKLLPGVELEPLKMFFRIGTAPA  
VPWTLMKLDPETGEQMYDDDGQPLYEGYCIDLIARLSETMSFDYIEIVSPKSGGFGKKLPNGTWDGVVGDLMRGETD  
IAISALTMTAEREEVIDFVAPYFEQTGILIVIRKPIRKTSLFKFMTVLRTEVWLSIVAALVLTGFMIWLLDKHSPY  
SARNNPAYPYPCREFTLKESFWFALTSFTPQGGGEAPKALSGRTLVAAYWLFVVLMLATFTANLAAFLTVERMQT  
PVSSLEQLARQSRINYTVVEGSSVHQYFINMKFAEDTLRVWKEITLNATSDQAQYRVWDYPIREQYGHILLAINA  
SEPVDAKTGFQVQVNEHTDADFADFIHDSAEIKYEVTNRNCLTEVGEVFAEQPYAIAVQQGSRLQEELS RALLELOK  
ERFLEQLAGKYWNESARQACPDADSEGITLES LGGVFIATLFGGLGLAMITLAWEVFYKRKEKNKVQTLNTKPEK  
VAFESKSTLETKVAESVAKLKKRGKGNLAKNVTFGDTFKPVAEKGVSYISVFPKDYRP

>HarmIR21a

MAVSWFIVIFLLFYVPVYGEEVLVEYYPSQSILDTQHVKVKNKREIKSNAAAIALDNSNNVSTREINWRKFNQEKTD  
DAKIKKRALDPVFRGHPKTREELWNEHFLNETTKFDQTPSLVHLLHNITLTLYLKDCTPVILYDSQVKSKEYSLVQN  
LLKGFPMFSVHGYINDGGELVERKLLHASTDCQNYILFLTDIKASAKILGQPKNKIIIVARSSQWAVQEFASV  
SRMFVNLLVIGQSFKEGDDANLESPIILYTHKLYTDGLGASQPVVLSNWNHGKFSRNVNLFPPKMTEGYAGHRFLV  
AAANQPPYVFRRIKADLDDGGNPRVAWDGVEIRLVKLLAERNNFSIEIEPLELHLGSGNAVAKEITSGRADIAG  
MYLTTRDIRDLVDVSQAHSQDCAVFITLMSTALPRYAILGPFHWHVWVALTFTYLFGMFPLAFSDKHTLRHLLHNS  
GEIENMFYVVFGTFTNCFTFLGKNSWSKTDKITTRLLIGWYWIFTIIITSCYTGSIIAFVTLVPVPETVDTIKQLL  
AGFYRVGTLDRGGWEKWFNLSSDPQTKKLLNKLEFVVPNVEAGIRNTTKAFFWPYAFLGSKAELEYIVQANFTATKS  
KRAALHISNECFAPFGTITGFPNNSVYSEKMSLDISRMIQSGIIDKIADEVRFEMQRSVTGKLLAAGSGTIKIPSA  
EEKGLTLEDTOGMFLLLGAGFIIAATLVSEWMMGGFTRRCRFQRKVDTPISVNSREHLIPTPKTDIGSEIKIGDT  
ESRLHFDSRPSTAASRDITLEGQIINVTEDNIDVHNSFNVDRFDSRRSSSLDLREVREIFEKQKRRRIVSQDMES  
VDEHGPTVSRVAFGDPIKHEK

>HarmIR25a

MSTVTVLLLFNLVHIAFGQTTQONINVLLINEESNALAEKAFEVAKEYVRRNPSLGLAVDPVIVVGNRTDAKSFLEN  
VCRKYNDMLLAKKTPHVVLDTMTGVGSETIKSFTEALGLPTISGSFGQVGDLRQWRTLNANQTRFLLQVMPADI  
LPEAIRAVVTQDITNAAIIFDEFFVMDHKYKSLQNIPTRHVITPVKSFEANEIKTQLESRLNLDIVNFFIVGSL  
RTIKNVLDAADKNQYFGRKTAWFALSLEKGDISCGCKNATIVHMRPTPDANSRDLGKIKTYSMNGEPEITSFY  
FDLSLRTFLSIKSLDLSGKWPNDMKYITCDDYDGKNTPNRTLDLKTAFQEIKETPTYAPFFIPQDDPMNGRSYM  
STDLLAITVKDGASISSHSLGSKAGLSSNLTLTDPNMSNYSQAQLVYRIVTVEQKPFIIIRDDKAPKGFKGICYDL  
IEEIRQIVKFDYEIILAPDGNFGTMDENGWNWNGIIEKELVDKKADIGLASLSVMAERENVVDFTVPYDVLVGTIMM  
KLPRTPSLFKFLTLENDVWLSILAAFYFTSFLMWVFDKWSYQNNREKYKEDEEKREFTLKECLWFMTSLT  
PQGGGEAPKNLSGRLLAATWWLFGFIIIASYTANLAAFLTVSRLDTPIESLDDLKQYKIQYAPLNGSAAMYFQR  
MANIEEKFEYIWKEMSLNDSLKEVERAKLAVWDYVPVSDKYSKMWQAMEEAVLPNTIEEAIQVRVDSKSSSEGF  
GAWLGDATDVKYHVMTSCDLQSVGDEF SRKPYAIAVQQGSPDKDQFNNAIQLLNKRKLEKLEIWWNNNPETMKCEKQD  
DQSDGISIQNIGGVFIVIFMIGLACVTLGVEYWWYKWRKRPVVGDTVQVEPAKSTRNNVVDKQGEFTFRGRNLGL  
TFKPKF

>HarmIR31a

MLAQAVVEFFKNKVSSIIIVLACWPAVDQMKFTRQLSQYGSATFSCEPAILDKIHPQYLQGVLYMVRDDDNLAFF  
KKVKRVHFTMKYKWLGLGDHVPALRDIRYDSDVTFKLGWRNNRNETKKSTNLALLPEPPTSPIYFYDVYVHLREG  
ISIHWAHWTKESGFVTHDREKILRRLDLQRYPLRIATPVGHYSSDKYDGTFFVDYLDKETMLDQDPGIRSAHSAS  
MLLTEAVNAQDVLIEENELWATVVNNNSMFLMVSNGQADLSGGVLRLLLDRSFKLDYVTPLWPFVRVGFTYLAERESS  
SNMYLEPFSPGVWWSCLGIMAILAMVEWITAKTPKERE GALYTVLT'TWLQQDASAVPEGASGRWAFTVLSISAMLV  
HAYYTSIAIVSALMSTGRGGPETL KALGDSKYAIASEDYDMRYLFFDVETTWDDLEYLKKKKKTSKFYQELERGVE  
LIQQGNTAFHSEYNQIYPHFKTFSDDHICKLQHIDTIP EILTWTVT'TTKHGQWTEVLRIAGSWLQETGLRKRLVNRL  
RIPQPPCRASLLAERVKLGDIAPLLALTMLGAILSVVLGIEIMYAKAKGRKLQEGDAKHALEDSDSSSEVTDVVY

NYLA

>HarmIR40a

MELLLLLFLLINGVQSLLDIQDVTSDVMTSLPKDFSIAVKDIAEGMPTKAITIVRGNSTNIRSQDIFELLCLLSQHK  
VLTTNLDIATKENKQKYEFGLKALDVSDQRTSLILCEPYECENILFELTENNLIHSMILYFFYWSYGPVSDTFLM  
TMKEAMRVAVITNPRESVFRIYYNQGTDLRLNLHLTVNWWAGTLYKSPVLPPTDKVYHNFRGRVFEVPVLHAPPWH  
FVKYNNNDNTITVTGGRDDKLLALMSKKLNFKYRYDPPDRSQSSISSNGTFKGTGLGLIWKRKADFFLGDVTMTWE  
RLQAVEFSFMTLADSGAFLTHAPAKLSETLAIIRPFQWEVWPLVFATLLVTGPALWIVIAAPSLWQRRECDQLGLF  
SSCCWFTTTLFLRQSSSKEPSSTHKARLVSVLISLGATYVIGDMYSANLTSLIAKPSRERPIGTQLQALEEAMRDYG  
YELVVESHSSSLAILENGTVGYGRLANLMRRQRVQRVRNVEVGVRLVLSHKRVAVLGGRETLYYDTERFGSHNFHL  
SEKLYTRYSAIALQIGCPYLETFNNVLMTLFEAGIIAKMTTDEYKNLPEQARRSDPVTESDKQGNELMGDSTASQ  
APQSESAKGLQPVSLRMLRGAFCLLGIGHLLAAISLAVEIQLHRRSKRRHEPPPPSEHRKTQKLLVLGKSVMLFKRG  
YKRVCA TVYT GIDKALGPEVKD

>HarmIR41a

MLVSTPALAPLEILLNTIINRYLQSAYCITVFSETPFTFILPTSFISLIPNETILVEQIFNVSETGCSDYIVMRD  
PQIFMEAFERVVHIANVRRSDRKIIIFLPYDEEYNEENDVNLPSLVFAMKGSKYLANMLMIVNHASVNDCKIFNLV  
THQFVGRSEEATHLPKYLDSDWSDCTQKFENEANLFPDHLTNLYGKVVRVACFTYKPYALLDIDPAIEPLGRDGVEI  
RIVDELCRWINCTVEIVKEDVDQWGEIYANESGGIGVIGSVVEDRADIAITALYSWYEEYRVMDFSVAGVRTAITC  
IAPAPRLSSWEMPLMPFTWYMWLAVVFTYFYASTGLLTAQGCSTTTYPPFNVFMMIGQSQYESRASWRIRGVTG  
WLLIAGLILSCAYGAGLASTFTVPRYEPSIDTVQDIVDREMEWGATHDAWIFSLTLSTEPLVKQLVVSQFRIHSFDE  
LKRKSYTRSMAYSIEKLPAGNFAIGEYITQEAVLDMMLMLEDFYEQCVMMRKSSPYTEKVSQVLGRHLHQSGLLL  
AWETQVALKHLNLYKVQVEVRLSRSKNDVGITKPLNLDNVVGIFIVYAIGLTISFAIFLGEIYVHQKKKNEVLHID

>HarmIR60a

MSVDKIFLVNVVIFIQVHISDGVVNPFGPTVVNDYTNCSKVIDNEFHEPGLLI FANTNNVSTSVTRIRTKLLKRL  
HKEIKFSIEIMSPNNEVEICDLNRYNLGVLHVDVYVAIPFANYFVIIIDSYTDFSFLASKLIRSRSWNPFAKFIIL  
LFNFVQDDKVNIDYVERVLSCLFKYNAINVIAVPKANFNRAIIYSWRPYDPPKYCGYFNETAKDRLVQNMCES  
GVLKHDRKVFDNKIPHDMEGCVIEVLALQRHPFISDDEYDANIEKLMIDAMLKRFKMKARYNFIDGYRGERENVGE  
WNGGLKKLASKSGHLLGGIFPDFDVHEDFETSVTYLADAYTWVVPRAHKSAAWVALVIFKSLVWYSVIAGFFLC  
GITWKIIAELSEDSYNNRSFRHCFNLNWTITVLGFVSYLHPVKESLRVFFVFLNIYCMLFSTAYQTKLFEVLTNPSY  
EYQIQTVHEELVESGLKFGGFEELHDLFYNSTDPFDYRIGDQWTDITNITEAMIDVAHRNFSLLCSRLELAHISGI  
TPELSDSVGNKYTYFTDNVFSVPIETIALRGFPFMMEFSTTITIFKQSGLNEGLRQHFAHFNERRRARQLRALLK  
EKSDVNPLSSEHLQGGFLALALGYVSGTLALIVEIVNCDYVQNKFANFKRRVNLLS

>HarmIR64a

MNLFCNLLLTLSVTEVPLVIDILKHKNIKNAVLFCQYNNHFVSGVHKIFNENNVLIASSKIIISNGTYIIPDRKKT  
GIVVDTSCBGWNSVLDSTRVTSFKDYSFIIIAEHLSPILEALSRYPIILVSDSVIVAHKLNQSYNLYEVYNTGFKLKG  
KYVIRLLGHWNSSLYIEDLNRWDLGGAFVKTAVVVINPTKLTNQTTQEYMEKPIRMQVKVDTVHRMKFFILLKYMR  
DMYNFRFDMHRVHSGWYKRNGTFDGMVHALYCGQAELEGAPIFYRIDRWELVQYVSEVWTSRHSFIFRHPKYPGGF  
YTIYTRPLSGIYVWCVIAMLVVTAVILWAMLLVQNTWGDNEDSSSLAGIIIWGAICQQGIAINRESTSTKLIFIT  
YFYAVTLYQYNNATIVSLLLEAPRNIRTLKDLLSDSLKAGAHDIVYNYDYFKRTTDPVAIELYHKKVVTATQHN  
YFPAEKCMDLVRRGGYAIHIDTSVAFPLIKATFNEREICDTTLVQMYPQQRMGVVMRKNTQYREHVAYAIRRFSEA  
GLPQRLRSDVDEPMPECAHTPDSSVFCVGIREFSTPLLVLALGMLVSVLLLI CEIVLHRVVQRAGLRDFVH

>HarmIR68a

MFKIIVLFCFFTAVKLDTFPILKDLHERKDLEYVLIDLINVLMREYEVT CIAIICDEVYLVNVSGLPFKRTSAIPY  
VMTVVEDYEDLLSPNFVTLESRAARKEGCNVYVILLANGLQASRLLRFGDRHRILDTRAKFIMLHDFRLFHSELH  
YIWRRIVNIIFIKHHNKMTGTAKSRPFELSTVPFPNP IKGVFVPRRVDIWKNNENFHYKRPLFADKTSNLNGEVLN  
VYLDHVPSPVVMKNNVSTKLGGVEVEILHTLAEKMNFKPRAYQAANAEIHKWGQKQPNGSFSGLLGEMVNGRADV  
ALGNLQYTPYHLGLTDLISIPYTSQCWFTLTPEALTDNSWKTILPFLKLYMWIAVLLVLLITGTIFYGLAKNHMNLQ  
EYRRKS KSKRSNIDENTKPGLYLFG EIIINSILYTYGMLLVVSLPRLPMGWSIRLLTGWYWLICYILLVVSYRASMT  
AILANPAPRVITDTLKLVD SKVTCGGWGTQSKKFFEQSLDEYSQRIGDKFETIDDPMEAAANKVAQGVYAYYDNSD  
FLKYISVVRKNSFMDPKQNNVTNTEVTGRKDTQRNLHIMTDCVVNIPI SIGFHKNSPLKPLADIYMWVRVVEVGLV  
EKWLNDAMYQIRLTLETSEDEVKALMNLKKLYGAFIALAIGYSLSAICLIGELIHWIIIVKRDPNFDKYALHLYLH  
KNKKH

>HarmIR75d

MELISFILSYFITKDLSSMTAFICWTPERTSELCRSASGAGVRLQLATDFHQPPMPTPRGRFREAMLDDLTCPHAA  
LIMEAASSSRGFNYRHSWLLLLHNSSERGLIADALSPYEILPDADVVSAPDALLDVYKIKPATPYLLTDLGLTRNC  
SRHQLRALWGALPSAVTRRRDLKNVTMKGISVVTEPYNFKGWSDLRNRQIDTFPKFTYPLMMLAAQDMHFRFDLRQ  
MDVYGVSHNGSFDGLVGRLQRNDAEVLGASIFIRPDRMQVADYISETCVLLCAFI FRQPARSAVSNVFLAPFSAGV  
WAASAGVAAAAALLVALRAVLQRTQRDDALFTLPETLTFALGTLCCQGFFHTTGPVTSVRLVMFSTLLASLFFV  
TAYSAKIVAILQTPSDALRTIDDLTRS PITIGVQDTTYKKVYFLESPDESTQQLYRRKILPQGERAYHSVVDGIAR  
VRTGLFAFQVESSGYDIIRQTFTEREKCSLKEIEAFKLPLVAVPMRKNSGYREL FATRLRWQREVGLMSRERRVW  
LVSRPRCDAAGGGFVSIGIGDVL PALQVLGLGALISLTLAAELAHAIRNSRRWNHI

>HarmIR75p

MNIFTFIFLLLIHKS VYAKDANTINFIKLFIQNDQKPTHLIYGGLCWKKNINKLVVELSTIGVRTSASF PKPSKY  
QDHAILYLTDLCAQSKAII SYALSKELFQFTYRWLVLTSTKQLQQSKI SLLMNGSVLVSDLVLAERAGNHFKMV  
EMHRPGLNGSMITTPRGFYNGSFVDVRPHRELYRRRRNMGHPITMSNV IQDSNTTREHLPKEDRLELQYDSITKA  
CWSAAKIGFEMINATAKYIFSRYGYKVDGQWSGMIADLYSNKADVG TN CVIFRDRFDVVYTDLVAPMRMLFIFR  
QPPLAYVANVFYLPFSTRVWVTI AVCTAIATVTLYLASKVELVLT KASTQQQLDGGICDALLLTMSAVTQQGCYLE  
PRRAPGRMMVFVLTALMALYAAYSANIVVLLQAPSDSIRSLPQLANAKITLAANDVDYNHFVFNQSKPELHTSIR  
DRVFPENGKARLYSLADGVERIRKGLFALHSVAEPVYRQIEATFLESEKCDIATVDYLVTFDSFTPVRKGS PYLEL

IRVVHKQIRESGIQSAIRKRFLVSKPHCTTKMSSFSSVGLMDMKPVLILMLYGVCLSVTIAAAEILVFKLSEHRKK  
YKVESTPEPPS

>HarmIR75p.1

MNLKILYLLSFLYVFMVKCDGNFNSDVIMSFVTLEERPTSLLIPLHCWSQHALTSLVRSMTSVAVTTATSLQYNRT  
EYHLQVYVLIADLACPGTDRFLIKASKEGYFKAPYRWLLLNYYDDDKTVLKDVMHMLVDSVVTVKRISDQEYWFIEA  
YKISENSEVIYTLRSKWGRMEDHRSSNVLSRRHDLRGHILTMSNVIDTSDNETRVHMNDRLNLHQDSITKMSYAVV  
KICFEMLNATERLMFTHTWGYKDKNGQWQGIQVDQLLKKEADLGTLTIFTQERMMAVDYIAMVGSTAVRFVFREPP  
SYISNIFALPFGAVWLAIFFICVLGCSIFLYIASKWEASGMHPLQLDGSWADVLILMIGAVLQQGCTLEPRYAAG  
RCVTLILFLALTILYAAYSANIVVLLRAPSSSVRSPLDLLNSPLKLGASDFEYNRYFFKKLNDPIRKSIYEKKIAP  
KGKKANYYSMEKGEVERIRKGLFAFHMELNPGYRLIQETYQEDEKCDLVEIDYINEIDPWVPGQKRSPFKDLFKINF  
LKIRESGVQANIHQRLTVPRPRCSGHVSTFSSVGITDMYPAMLMTLYGMLLAPAVLLMEIMYHRLMIARQQKRGTS  
DYDHIPIFRH

>HarmIR75p.2

MLSMRIILQAFILVLILVERKAFARDHTLVHFIKSYVQNEEKPTILIMNNLCWEKKVVVSLANEMSKIGSRSSSTM  
GVDSRYYYHDLLEYLLDLDCPGAEDI IALATARNLFRSPYRWLVITAWSKNANIAALWNSPLLADSDLVLAAGSGGV  
LKLVELHKPSPNGTMI STLGRFYNGSLYDVRPHRELFRRRRDVMGHTITMSNVIQDSNTTVYHLPREDGMEPQYDS  
ISKICWMNVKLAQMLNATPGYVFSYRWGYKVNGKWSGMIDDIHSGRAELGTNCVVS DIERLDVVAYTDRLAPFRV  
RFVFRQPPLPYVANI FSNPFSKNVWIAMSVC AVLSTATVYLA AKWEAKEGKGPTQLDSIGDAMLLTFS AIGQQGCV  
MEPRRLSGRMMVFVFLFTALMALYAAYSANIVVLLQAPSDSIRSLPQLANAKITLAANDVDYNHFVFKLHKDPVREI  
VYKRIDPEKGKKHFYDLNEGVERIRQGLFAFHSIVEPVYMRIEQTFLETEKCDLMEVDFLNSYDTFVPVRKESPYL  
ELLRVVFKQIRESGIQSALS KRLQVPKPHCTSKMSSFSSVGLMDMKPVLILMLYGVCLSVTIAAAEILVFKLSEHR  
KKYKVDSTEPSPS

>HarmIR75q.1

MKYFTLFLNILLCLKWCVSILPNNDLQMIVDLANSYEKPTAIVANVCWNSKADEVKLSKMLTNLERPITVRYLRKNK  
TFANSYPNNHLLLLLDKNCVDAEFFLKQANANKMFSKSYRWLV LGNPIQKESIVPPEFRGLNISVDSEVIMAQKTA  
NNDTLLHTIYKIRPKSEWNI EYYGVWSADYGLNKS DKTIQSNVMRRKDFKGEPLTASSVVEDKRTTSLDLITLRHI  
LVDTVAKSTFRSINPLDFLNASRRILFNDTWGYKVNGTWNMGIGEINTGKAELCGMVTFMSLERLKILEYFTNPT  
PVTVKIVFRKPPLSYQNNLFLLPFTTGWVICLGAFVLIMIVVLYINTKWDIKKYEQFNEQNM DQTCLPPTWSDITI  
FVLSAISQQGSSNELKGTGLRLVMFIVFLAFLFLYTSYSANIVALLQSTSNQIRTLSDLLNSKLELGVEDVPYNY  
YFSPAQSASDP IKKAIYETKVAPRGKPNFLTLEEGVKAMQKRPF AFNMNTGTGYRIVSALFQEHEKCGLHEIEYYQ  
NAKAWLCSGKNSPFGEMFKVGYIRIQEHGLTDRENRLAYAKKPVCSVMGSSFD SVNMDVDFYVCLMLLYGMILAFV  
LLVIEILAHRHQMKKHNPEDVDTQLQ

>HarmIR75q.2

MKTIFFI AALCSLSLCNGQDSQNMQVMLS DVIEASGRPSSVIAKL CWTPSKIIQLH THLTNKYIQFSANDVIKTDN  
PEFYDEEQHIVFMADLDCPDIDTYFEKNSARNVFRAPFRWILFGNSSNTDDDIVPRAISNDVLLDSEVLVLRSD  
DVYEMHFYIKISPNNWTQTEFYGTWNAKHRFQKSPRFFEP TSLRRLDIDGYEISICYVLTNNESVNHLS DGLDHI  
DTITKVNFPPTNHLDFLNAKRKYIFANTWGYRVNGSWNGMTGYLVRGEVEVGGSPMFFTFERVSIVDYIASPTPT  
RSKFVFPQPKLSYENNLFLLPFTT VWYSTIALVFIIYLVLLLVTKWEWKTKQD LLETREK DAGVLRANVDDIIVL  
IFGAACQQGSPSELKGS LGRVVMLVLFLALMFLYTSYSANIVALLQSSSSH IKTLEDLLHSRIKFGVHDTVFNRY  
FSTATEPVRKAIYEKKVAPPGTTPRFMTMDEGVIQMRKGLFAFHMETGVGYKFVGK YFNEGEKCGLREIQYLQVID  
PWLAVRKNTPFREMFKIGTKRIQEHGLQYRENRLMYEKRPKCTGGGSNFVSVSMVDCYPAVLILSYGAIVALFLA  
LEILAHKKENILRKLNCRKDEM

>HarmIR76b

MAGIELIISSICNATFCDVPYGGADKGSEVLTPEVINFKSLMQDVNGKNLKVTTYNNTPLSWTEHHNGTVVGKQVA  
FTVMEILRKKFNFTYDVEIPKRNyelGGRVTDDSIIGLLNSSKVDMAAFMPTLIAYRKQVSFSIDLDEGVWMMML  
KRPKESAAGSGLLAPFNDLVWYLVLA AVLTFGPCITFFTRVRTKLIADGEGVLPLKPSFWFVYSAFLKQGTNLSP  
ANTTRVLVFTWWLFMILLSAFYTANLTAFLTL SKFTLAIENPRDLYQKNFRWVASAGSSVEHIVKTEGEDLYLSA  
MINNGKARFLSVLSDKDFLDPVKRGAVLVKEQTVDHLMYNDYTSKKDVEESDKCTYVVA PNAFMKKQRAFAYPV  
SKLKSFLDPVLTQIFQAGILDFLKRSDLPSTKICPLDLQSKDRKLNSDLIMTYLVMVAGSATAVAVFAAEI FIKR  
YLSVKVNKTKKTRDNKKSKIGKKSTRYDDSRPPYPDSLFGKNPRFNVE TTRTKIINGREYYVFETGNGDRKLIPA  
RAPSSFLYRSDK

>HarmIR87a

MFAPLPTLLFFIHFSS TMSENPLLMTTGNSGQTTKTAECVLKLSAKYFVEKKALSGSIVIININSYTSTTQGLLLQ  
TVHSGIKYSIMVKDSFYPHANASHFPEKAKNYMLILEEKSELERNILQLNKLPTWNPLAKAIVFYQLKHNETAEET  
SIEFINELRDYKLFKTIIVFIYDEYNDVVISYTWRPYSDTNCGGRCD SVYVLDRCTNNTIYEF EKQHDMFPSPDMKGC  
PLVAYAVIAEPYVMPVGKITNSSFDDAYEFAKGGEINLVKIIISQFTNMSLITRTSDILENNGVVYQNGTATGA  
FVLRNESADLVIGNVEVTRILRKWFHPTVNYLQDEMTFC LPKAGQAPTWDNLVIFQWTTWATFFSLVIMGLVFHV  
FYYREHTNATKWPTNSLLMTFSMLLWGASFE PKSPTRILIFAWLCFSINMGISYESFLRSFLMHPRFEQISTE  
ADLIQSRIPLGGREIYRSYFETNNASSFYLYREYNSTTFSEGVRRALERNFAVVSSRRQAVYQDQKLGKGA PLIY  
CFPESNNMYKYGVAILTRRWFPMLERFNNIIRSVSENLIDKWMNELLIHVSSEEASTIMPLSIQNLLGAFMFIG  
FMYGASIVIFIGEVVIGFIEKRKQTKKVMNKRLR

>HarmIR93a

MKVWILSFVCLFVSVSGEDFPSLITANASIAVVLDRQYLGEKYQSILDELKDYIKELARVDLKHGGVIVYYSWTA  
ISLKKGLAVFSIASCEDTWDLFSRTEEEELLLFALTEVD CPrLPshSAITATFTEPGEELPQLLLDLRTSNAFQW  
KSAIILHDDTL SRDMVSRVVKSLTSQIDEESASPVSVTVFKMKHEINEYLRRKEMHRVLSRLPVKYIGENFIAVVT  
SDVMTTMAETARDLLMSHTQAQWLYVISDTNAQNGNLSSFINDL YEGENVAYIYNMTDNNPDCKNGIMCFCQELMD  
AFISALDAATQDEFDVAQVSD EEWEARPSKIQRNMMLLKHMQQH LAAKSRCGNCSTWRALAADTWGATYRGLSD  
ASDLSNVNTNGSSGVIDKIDLLKVGFWRPIDAVRFDDVLFPHIHGFRGKELPIITFHNPPWTILERNESGAIVKY

SGLIFDI VNQLAINKNFTLKI I LASVLKKELANDTLADTMHGMDAKLTIAAISKGQ GALAAASFTVLADPMPGINY  
TMPVSIQPYAFMIARPRELSRALLFLLPFTTDTWLCGLAVILMGPTLYI IHRMSPY YEAMEITRQGGLATIHNCL  
WYIYGALLQQGGMYLPRADSGRLVVG TWVLVVLVVVTTYSGNLVAF LTFPKQEV PVTTVAELLENRALYTWSITKG  
SYMEMELKNSDEPKYIALLKGAEMVTT SVGMGGTMTSGSALLQVRVFRHRV I IDWKLRLSYLMRADRLESDNC DFA  
LSAEFFDEK VAMIVPAGSPYLPVINKELDRMHKAGLITRWLEAYLPKKDRCWKASSMMQEVNNHTVNLSDMQSGSF  
FVLFMGFFSASTVLVLEFLYHRRKRRELTVIKPYVE

>HarmIR100b.1

MKLLAF LILTTLLA ISSSKPGKKLVP SVAIDCPLIPITKHSQTILFDVDVNSDPSIRT CILKSVSEQSVLILTDYD  
RRPEVNFTNKRIMTNEFPNVIITTNHLSFKAVRCNKSP LLELFMKSNWSWLYIIVTGDSVFSCKNGTMTSKHFRLL  
EKFMNTIWHRFEVMRVGLAFPIACKQKMI IYHRKR PSTQKLYDRS IKLINATSYKDLLAAINYS GTGLCAHYPIKA  
NIFERYPT SITQCKNLHYD IHFNLNLTFGYCGLDGMVMDLLTHFRFNLSSPKNEDCN IYGF AIPGNISGLGCI  
VRNELDLSFNSRFMTLYSDEHIYYLHYITTDKLCALVRKTGVVPLWHGPNVFRPPLWFIIMGVVLVLSIGIMWVYA  
IINRTITGQKV MAYWYLLNAVMTT MIGCSPMKNSRMIIIRSACLSGSILFLAVYQGHTSRVYTTLKHFERISTLD  
DLAFA GAILYTTPGMRQFTRQLQRPGNKLEEDFFNRSRLILNERIGAGITLEI PRATTLD RKS DAEMKILEHFS DR  
EGRPLIDIVDEC FMNYFLSYITRSGFPFFEEI QIFTQRLL EAGLP TKYKWTQ QMLNIPTSLPETRSEPRPF SKIK  
LKDQ RVAFFVL FVGSALS IIVFAVEI FKGPPVEF

>HarmIR100b

MHRIKYFV FVVC IASSNCELR TKLMPAVLPNCPLLPVEKYSQT VVIDINTNTNP ELKSCLVKTCGHSVVIINVC GK  
RYTINMDIDRKS IKT TDYPNIILITKHFTKKTADSGLLKYVVKSLNWSL LYFIVTGQQQYQCLNGTMTSDMLLLD  
NIMNSIWHKFKIMRVIVAFPYT CEDKMLVYHGKRPSTGDCLYDRPVKLINATNKEELLKAIRKS GEKLS ENYPIK  
ASIFERYPTS I KDCSNLHYYGHNLSRSHGYCGLDGI VMDLITHFNFNLSFPENETCNTYGF AVPGNLSGSLGCI  
ARNELDISFNSRFMTLYSDEHIYYLHYVITDKLCAFVKRTGVIP IWHGAFNVYSPPSWMMFIIGVIMIISV I IWGSA  
IVNKKLTGVKNKSCWYLYHTLTMTMTGSSPMKQRTLLMRGSCLAGSVLFLAVYQVSWSGHISR VYTTLRRIEQI  
STLEELYRSGATLYTSPSFRELSKQLLNKKNKLQVEFFNRSLLTPHETLDIVLQQPFATSLERKS DAEMEILT KYS  
NEQGPLIDMVAECLHNYLSYIARS GFPPFFEDLQVFAARLKEAGLPEAYYRWTQKMLNIPTSMPEDHSI PRCFRPI  
RLRDQ RVFPFVGLFVGTILSLIVFAEIRKGKSRNVK

>HarmIR85a

MLVIFVILLMCHPSLCFDESSVL FQEVKEYHRDAWLKAEYAYEVVNIMYNSFRQWYFTVTFCEFTYFENRILKYTE  
QYGYGYNVMLLSGCPYSNNSFVKPRHN RHGETAYLVTSNDLSLDVSETVIAALKRTGIFKPRSAVIFVIKNVLELD  
NYFYHALSNHFQMLWSSSVTNSVLILKTDRLRMYSYNPFFQEI KIDITNVRDVS KLLSKQYN NLYGYGLRLSVFRKV  
YVSDRTGVPVRCDSYLAQVTM KFLNASCYPLPRDGSTVGDLLENGTATGVTSDLIDGYTDL ELSNRILKN TYGYGI  
DTTYPLDQDEL CFLVKKSDTQSTFKTTINLISMEMLL LFFFTFTVFIIITILVRKAENLLNLNDERRAEDTLIDL  
IKCFIRQTMDFDFMGPVFRSLVLLII IYSLIIDCAIDG IITSAITYPRYKPD IETMAQLGASNLTFGIHN RDLKIF  
NSSLSTDY YELIKNRIVPFS DKKIKEVLEKREYQYATLLRKS DSQYVSRKVSNM RKGKPLFYTPDCPLPCFIVYG  
LRYGSPYLNRLNYIIHHLFQAGILQYWSKTEELNADRSRLGAIENKDRKPLNIKNLQEMFYMLAIGELISTLVFIF  
EILYHKYHKQ

>HarmIR100f

MTVVLFLTL LLLLANGTSKSLMKPENPDDQLLTT CVIDILNKYFIEQKQLTIVLNSTADMKLQDIYSKTNTTIFIR R  
PFCNFCHYKRVHAS YVFFANNSQDFSEN FQYL VQEPFWNPY GKFLIVISSLQGD LRVIFDVLLMFHVNNVLLNGT  
GPGHLYTYNPFANYACGRYYDEIIGFGTCLNNRANLPDKLVSGLRNCTFRVSFPHKPPFTVNPSIVKHLIRQQPL  
IGFEEKLLKVLAEQEHFNITYNDRY GKPFYSVILPNMTAVGPLSLIQRNKTDIIIGGMMLSPARYSALSHVSGHFD  
YLDELIFAVRKADLV TNSKKIFLEFHPTVWLL LILVFI IYFILLIIVLRPKDKSLIMLKM LSSSLVLHGCGMSCRYT  
VKWLVL IWL VFAV IINIFYQTSLSYLTNNPIREH QINEEH EHLNNLKACIEPALVAYLRAEHI PNNTLTSEEDINDC  
DNIARNVHKVQG NRKLYTVLRKMMFEFSKD HFTDPWGHSPIHTFTKPLSKTISAILLYKGFPPTHQLKVTLRLIE  
SGLVNKFLGEHMLKKIKFVFPREPFR AHV IIPWNLFAVGCILALITFFLET LHRK YKIYFRGDY

>HarmIR100e

MLTVHFLLT LSLASCRSDNIHIEPQTKMPLIMCITHVIEKYFSEQVLT YVDMDSDDNVLLKAIHSLKATAV VFR  
QPFIRSPFRHRGYLIAAKTSNIFADHFKLRQEPTWNP AARFLIVIKILKEDELKKIFDVLL ESHVFN SLLINATD  
EAQIYTYNPFDKYACGHYYSEVIYYGEC SQTKTDLYPNKLVTGFKNCSFRASVPHRPPYSVDRAQLNNITQTDILG  
TEQLVLKLLGEKEQFQVNYTYDYDKFIYSTISP NMTVSGPMKTLTNNESDIIFGGIWLVASRSDAFTYLYGHLD FE  
DDLLIIVKRASLVAIWKTTFLEFQPTVWGLLVMTFLLYSVM MIRILGADDKFGVMMTLFKNLLANSVHI PNRSEVK  
RIFLTWIFWSFLINSIYQSSLSLTSHPAKEHQVYKIREIFVYKMKPCINPSMLIYIETEMNVSTPIDNNCLDTPK  
NL YRVCQSDKIFTLAQKFVYQYKKLYCDRFGQPRVYYFNAPYAQLMFGIFFYKGFPI TDRMQTHLLRFKENG LVS  
KCLKDHYSRKIKHHFHEKEFEARFILPWVMHLIGCVLATIVFIFELLSKRFKWFQR

>HarmIR100c

MTKRI VVLFYLT FHGSFIQLTDAENIPELYNFAVNKKYNTVGCINSILTKCFPCGSLTTFVNPANAMDQLIKTTNA  
ENICHSIIVRSFDDCDWYIWTNVYVITAPDLLAFWFGMLDLSRD LFWNPRAKFIIQVDYLGANGEGIEDVFKIVIK  
HRMYNVLLQNLKDDAVIYTYHPFENN SCGRFDKIIITLGK CENEDDIVDYFPNKIPSEMNCTFNVVATDDVPNF  
ISKSSNYTVYKGK VSGLEQFVLDTIAEREGSFVEYEVITGDATFGVVL PNRTTTGLLNYIDRNKADIAAGGFILMQ  
NRVELFDYIWGFNYAAFYLYTPAAGNQVWRRVYREFGLRTWLTGAALVLMIVVGLVIKRLINDKSFSVLYIWGYF  
FGNSNGGFSTHKKFKLLMLMWSFFAFCISSFYNTALVGLVSVHVQE QPHSLNVGNLKTLSYEP CIDSNSRLFFQYA  
YNQTL PVGKD IHNCTNTDSSLELVASTKKYAVAMEYSYKLKEYQYMDKQ GKPKLESWLF SNTNVI VVYLVRGF PF  
IEKFQDYAHRLYESGLTLNHFKLISLSRSY SVLQRHPKPF SVTKLLDLKMHFGILVAGWVLSFICF LLEI WYNNINI  
SKKIQRVYVN

>HarmIR100d

MFFLV MFYSIVSAGAF LTTDHENIESLTNCVVKI IKKVDYNRYTKVVDVTL MNIKNDIKLSALHNL TGVRFVSRRF  
FWNTNDLSNKYYLVMS EDFQELEEGLKEVTS DIFWNPLAGFIIVL KSHKHSSHDITDLHTYNIFFASLILHKDD  
KYFIYKYNFTASNRCYKAGHLTLWASCSDFCSEKQLPILIEGNIRNCQYKFSRNLWPFTNFDTAFKGTEQWFVAL

FEKQYGVKIDLKFKGKIDKCETITYDTKYIMLKVENNEVEGAVGGYSITEEYSGNVSHSYPI SIDYMYIILPHKK  
YVGPLVAVLHGSTGTFFVLIGLLFVIFCIAAKFLSIFAAQKDFSQDVLVFGYLLNKCSANRISAGWPQAI VFSLL  
FTSFIFPYAIQANLYSVTTEPVRGQEPKTSQDLKNYKAVLYTDFQYRHNKEFSGYLDCGNRINCLMLVKNCPDKSC  
YTVMTSAHYFANLWQLTDDCKMTTYILREPYITSLRTIYLRRGSVLIRPIKEFLLRI INSGVLSKYSRDLIYREW  
LKRKCHHRSEHVPLSMSSTYYVFMMLIAGYCLSVITFICEFMARSQII IRRRT

>HarmIR100h

MLVAYILFLLYEANSYKIPTPCPEYNKKLVKCVTDIVREHYSEKKVITYVGDKFEDEELLKAINNAGTVSIVSLK  
STKRMIIPHEAYLLSGKNATFIAKHFPKVRRET SWNPLARFLVLVKNLTESDLKIVFDMFLQLHARHVI IVNATED  
AHLYGYNPFDNYGCGKRYDYIFS YGKCAKAFYKELYVNKIITKLRNCTFNVVITQWPPYTIILPTNDSNDLSPLRHG  
AEPYLFQLIGRMLNFKINITYDYTAVEEFPTVSTDMEAVGSLKKLQDNQADAAIGGMLLTPSRALAFS FVYGHAY  
TDEIRFYVPFDNYACGKYVTDIIDYGPCKENPNDLYPNKLV TGLKNCTFRAAIVHRPPFTVNPLKAPKTIILGTEEYI  
KTVLILWMWFAYLVNTFYQSTLFSLTTPAQEYQISNEEDLARFRLKPCFSKVMENYYRESVQSN DG YQRIKGC DG  
LVESVHTVANSEDLYTILLNGQFRYNMQEFRDKYGT SRVVALPKPYSKVMAIFLYKGFPMIN YFLHKSRLRLRELG  
LVDKVLKKLTYRRLIKYRFHEKEFQTRFAIPWIIYVFGCSIAIITFII EINMPRH

>HarmIR100i

MLVAWVFTILLNFGQCQNILPPEAEDNQELRQCVTDILDKYFNESI ELYVNMETDNEDLLQT VYKSQKFSLVTRN  
SMYQSVLPN YGYLIITRNVTNFI EYFKYLQTDTTWNPYARFLII IETLEDEDIKSVFDILLRKHVNNVVMNGTTD  
AHLFTYNPFDNYACGKYVTDIIDYGPCKENPNDLYPNKLV TGLKNCTFRAAIVHRPPFTVNPLKAPKTIILGTEEYI  
LKALAELEHEFEVTFNYSVNP AVFSSAFPNMTAFGPMEMLQNNETDVI FGGNMMVLTRGQAFSFLNGYHDYNDLRF  
VVKRASLVPLWKT VYIEFDTTVWMLIL LALVVYSVMVIYLLQTKDKGFVFMELLDNLLTHSRDIRCSMTIKCILMI  
WVMFAYLINTCYQSSFLS LTTNPSKEHQVASEEDI IQYKYPKCF SVALKTFLSLEITEGMLSTRSSPADIDQNACS  
TTIQAITTVSRTKGVSFLIPNYIYLYNKPSFNDKFGNPLIY YFDKPF AKFLYCFYFYKGFPI SNRMRMNAIRMREN  
GLADKSMKDHFFKRALKQRF SQEFETR FVLPWGLYIIGCTISII TFLVEYMSQS QLKIQEQHVL

>HarmIR100g

MSAAILFSILCLNYCTSANGFYLGEELRNENLIVCVTGIIEKYFSEYKGLTHVQFETNSEHVRLMRAIHSSAITAL  
VTQDPNQQLRVSHQGYLITASTAKEFTDNFSTFVDDLSWNP FARFLIVRRVHEEELYQIFDVLLRWHVNNIILVN  
GTNDAQLYSYNPF DN YGCGKIYKDVIRHGF CLETTSNLYPNKVVTGLRNCTLRAAI PHRPPFTLRPYMIEQNDRMK  
MGSEQYLFCLLAETE QFVEFYEGDY YPLSKLYDNISIPGPMENLRNNKYDVMFGSVMLVASREARFTY LHHGLD  
YHDEIRFIVKKANDTANWKNAYFEFHARVWWTVLAVFIVHSTLLNIHLRSKDKTDTMLKMFDLLLSHGCKMPHRMS  
ARCLFLIWWFAFLINNLYQSALVSLV RTPVKEYQV KDEEDIVRMQLKPCISP LLQYMYTESNITNSFNSNCTNP  
FSSINFVAKSKHYYSVQKTVFYFNKKQFCDEEGENTVYF FKKPYAKLIFGIF FHKGFPISDRMRTNAIRLRENGF  
VKKKLKDHIFAREIKIKYHDKGFKCRITVPWFIIYVGGGSLAVIVLIVEI IWSRYKE

>HarmIR100j

MRAVYLLVFLIYSGNCVKIPIAGPKFSEKLIQCVIGIIEYFTGSKVITYVGN SYQNEELLKALNNANIMSVITRR  
STIKRTSKHQAYLITASNATFFAQRFIKTTKEPSWNP NARFLIIVTDLDGDLKLMFNTFLKLHANNVIVVNATDDA  
HLYSYNPF DN YNCGKRYDEIIEYGKCSQAHA YDLYPKKLV TGLKNCTFNILITQWPPYTIINTNDSNND DPLKSGA  
EPYLFQLIGELGFDINILNTNDSEEFPTVSSEMTAVGSLKRVQDNEADVVLGGMLLTPSRALAFSYLYGHFVYT  
DEIRFVVKRASDVANWKYIYLEFESTVWLLLLLALVIYSLAMILLRTNDKSYVALILLGNLVLHGRSLRTRWSVK  
YVLI IWWVFAYLVNTFYQSSLVSLVTHPV RDYQISTEEDITKYQLKPCFSSIMGKYVSVQSGTGFDVTHGCGYL  
MESVTTVSQSNMFTIILYGVFQYHEQKFDEYGNPLIISLPKPYSKVIYSMYMYKGFPMMDQLRHRALQLRENGL  
VEKVMRDMIFMKRIKHSYHKREYVPRFAIPWLLYFIGCLASIIAFVIEIISKRNITHEA

>HarmIR100a

MNYHSIFILCIFARTAHGNSTNGLSLLKTGPDLQD RITMIIDIISLNLKQNGWDTIMCVGKLPDSFYV KIQKIPY  
SFVVMNLDDPDDYFIEDTVPYHANFIIISCQDYEELEELRQKLVASPYFHPLANILTYHHRREDKATMAKFFSAW  
YYKAINSILVQFSDEEETLLVSDFTPYVNEDYKI QPENKFGCWTARNLGMPVVGFD TG YVCVEKHNVS IHTRLRA  
NNLGT CIGFNTNSVSYNDFTHLRNKL FEDRTKDLHG VF FRAYAVQVKPF FLIKNHGNGTYTLYARDGMIWNTMAE  
LFNFGIDLSPSVDMMPNFNFEISIDQIFAFARRKGDLC LFP IYQFDVI VVGLDFTY PFKDSGICILSARAGFETS  
LFRIKTLRANISTII LFLACFACTWATFTVYKAAEKRLHSFDQIGKDFMNTCRQILMINLYKPPTHHFFRI FLAIA  
LWCFFVINFTSQATII SFFTAVKRGKEVDTFDDV VAKGYPLEAMASPD LILPDTEEFRIINSRLVNEVDIYGCVD  
RLKTDPRRFCLMDCSVGRYIKRNLNRHGEQYLHIAEQDRIHSHYLAMV FSEHSPMTERFSRYMMILCEAGLIRKW  
EQRYRTDIKDEVTTKPLAFDDLSGIFQVFCFMVGNTLMIFFLELVASRIKTCQNIKIPNRLPKRNTE

>HarmIR143

MWKYLVYSTLIIVNSVHGKTD TMKLLPKNNEKNA SEFNSITDCIISISDKELFFMPTVAILKQAENNIKENL FINE  
LIDKLT LFNIPQIIIVEEDNEENHELYINSLTIAFIETCDDINKIDFNKVDAMRFLITISDSTKDKCIENLQEI G  
ESISHDAVTFIFRSNEADINEMFTIFPKIDGNTCKEVVDEPKHINTCINGTLDNDDIFPIKNPGNLNKC PFKVGMS  
TLRFPFSTMKNKEKLKYDRVDDIKGSDFEIMKI INEYFNATLEIYYIFKTEENPYS DVEFIPFVINGSLDACAGGI  
YRIYGDIVEYSGIYVSQIFWVYYVEREDRSWQNL MHKLNDIYIFMIFYISYSIIWCLIRLFDGEAVSLMKTLLYC  
WGALVGASSLQDPRSRKQKFLTLMYLIMCIYLSAYVSMQFYAFLTITAPHTFTKNSDVMSGR TAYLKDITKYFI  
SDERYTRFANKSADCVSFLDCSEKTLTYNGLTVILQGGFFYNFQAATAVND EARILRATENILTVYNEMIIRKDSPL  
VEKFQKVMQRLFEAGITRRLFTEAIGISVVAKAKSANTNMISSSYSCQAGCSITLKQFAGVIFYAWIFGCIISSVVF  
ILEIFLKREKRLLTKEI

>DpunIR25a

MLSAKKTPHVLDFTMAGVGSETIKSFTAALGLPTISGSFGQAGDLRQWRSLN LNQTKFLLQVMP PADILPESIRA  
IVVKQDITNAAIIFDEFFVMDHKYKSL LQNVPT RHVITPVKS FQKDEIKNQLRGLRELDIVNFFIIGSLRTIK NVL  
EAADENQFFGSKTAWFALTLDKGDISCGCKEATIIYMKPTDAKSRDLGKIKT TYSMNGEPEITS AFYFDLSLRT  
FLAVKSLLD SGKWPNDMKYITCDDYDGKNTPNRTLDLKA AFQEVKEIATYAPFLIPEDDPMNGRSYMEFTTDVA AV  
TVKDGASIGSRSLGTWKAGLNSPLSLSDPDSMIEYSAKLIYRIVTVEQHPFIKDDTAPKGFKGFCIDLIDEIKEI  
VKFDYEITVAPDGNFGSMDDNGNWNNGIIKELIEKRADIGLSSLSVMAERENVVDFTVPY YDLVGT TILMKLPRTPT

SLFKFLTVDLWLSILAAYFFTSFLMWVFDKWSYQNNREKYKDDEEKREFTLKECLWFCMTSLTPQGGGEA  
PKNLSGRLLAATWWLFGFIIIASYTANLAAFLTVSRLDTPIESLDDLKSKYKIQYAPLNGSSAMTYFKRMANIESK  
FYDIWKDMSL NESLS DVERAKLAVWDYVPSEKYNKMWEAMREAGLPNSIEEAIQVRVDSKTSSEGFALWGDATDVR  
YHVLTS CDLQ MVGDEF SRKPYAIAVQQGSPLKDQFNNALLQLLNKRILEKIKENWWINNPNAMKCDKQDDQSDGIS  
IQNIGGVFIVIFMGI GLACITL GVEYWWYKWRKRPTVGDVDTQVEPVKTTRLDPDGRVTKDEGFNFRSKNLGLSTLK  
SKF

>DpunIR8a

MDMNLIIIFLIVNLGCVVSELSLKVFVFIIEVHEKDLTHKIGKALKATEENNSELKLDKDSIIILLDRENEEDAYGKLC  
SSVFKGVSMVVDLSWSSWHYAEIEISSATGVPLIRMELGSQQLVKAIDDYLESRNATDAAIIVESEADVDKTLKYLL  
GNSNIRIWNPNGLSRDSSKMLKSMRPEPSFHVLVGESGFVMETYKRAVKEKLVRRSYRWNVLVTDYRIDTTLQVLV  
PTVILQADPSECCRMGKECTCPGDLQRTQELLNSLLQYITEVYLKLSDDLFTFTIKINCDNLQSSDNMNNTKEVI  
YKQFAEDCESSNETLFFWEEDKQTLYLRSRFILSIYKPEQVLEKIASWNADEDYSLLPGVLTLEPLRMFFRIGTSAA  
VPWTMHKLDPNTGEPMITEDGQPVYEGYCIDLIDKIAEAELEFDYEILTPKSGGFGQKL PNGSWDGVVGDLMHGETD  
MAVAALMTAEREEVIDFVAPYFEQTGILIVLRK

>DpunIR40a

MKRMFVIYLRVNI VFCFFDIRDITSDSLKSLPKDFPIAVKDIAEGLPTKALTIVRGNSTSIRTQDIYELLCLLSEH  
RIQVINLDIATKDNKDKYYTFLKTALDVSDETSIIILCNPHECENVLEELTETNLIHRTILYIFYWPYGDVSKKFL  
NTMREAMRVAVITNPRESVFRIYYNQATPDRLLHHLALVNWWSGRLYKSPVLPPSNKIYRNFNGRVLNVPVLHAPPW  
HFVSYNNDSSVNVKGGRRDDKLLALLANKLNFRYRYDDPPDRSQGSSISGNCTFKGTLGLIWKRKADI FLGDVTMTW  
ERLQAVEFSFLTLDASGAF LTHAPAKLSETLAIIRPFRWEVWPLVCATLLITGPALWIVIAAPSLWQKKRTNQRKL  
LTNCCWPTTTLFFLRQSSSKEPSSTHKARLVSVLISLGATYVIGDMYSANLTSLLARPAREQPIGTLQALEEAMRY  
HGYELVVESSHSSSLTILENGTGVYGR LAKLMKRQVRVVRNVEQGVRVLVLSRRRVAVLGGRETLYYDTERFGSHNF  
HLSEKLYTRYSAIALQIGCPYLETFNDVVMTLFEAGILAKMTTDEYKNLPEQSRSEPTETERPSADFTGESLQS  
SQVQNESTIGLEPVSLRMLRGAFCLLIGYSLAGLTFIIEIQTHRRSELSKSSPAGTKQMRSVTLVTRTKRFISEH  
NRRIKMTICTYLDRLVLPPTPIRKTSLFKFMTVLRTEVVLVSIVAALILTGFMIWLLEKYSPYSARNSPESYPYPCR  
DFTLKESFWFVLTSFTPQGGGEAPKALSGRTLVAAYWLFVVLMLATFTANLAAFLTVERMQTPVSSLEQLARQSRI  
NYTVVEGSSIHQFFINMKFAEDTLYRVWKEITLNATSDQAQYRVWDYPIREQYGHILLAINASGPVLDAAAGFQQV  
NEHTDADF AFIHDSAEIKYEVTRNCNLTEVGEVF AEQPYAIAVQQGSRLQEDLARALLQLQKERFLEQLASKYWNE  
TARQGPCDADESEGITLES LGGVFIATLFLGLGLAMITLAWEVFYYKRKERNKVQAIDSTIEKSGFEGPKKLNLEKR  
KFDIKEKLSKSVSKLRKRDVGKRNITFGDSFKPVAKKPGVSYISVFPKNEYRP

>DpunIR75q.1

MNMSVFILILNVI FSNATNNELTMISDVIKSFIKPTVVTAKVCWTL SNKIKLLSYVMYADFPTTIRFVEDNFDMSD  
RSPAQHRLFIMDLNCNNSRVILKQASAADKFVKPHRWFLFGITSINRENVLTTLDDLNTFIDSEVIVSEKTDTNKY  
MLKLIYKIKRNSEWIEEHFGSWTEDNKL VKSWNILYNSITMRRKNIQQEPIVISVVVTHNRKSKLLDLTDMTTDS  
ASKSTYRHILPLYDFMNASKGLIYNPEWGVFKNNSWTGMIGQLVRGEAEIGGTVTFTVTSRIGVIEYITCPTSTV  
KFVFPREPSLSYQNNLFILFPNPMVWYCMFSFVMLLIFILYINARWEVNKTTKYYGKALDSTTLRPNVSDITVLIVS  
AMSQQSGCFELKGTIGRLVMFILFLTFLFLYTAYSASIVALLQSSNQIRTLSDLLHSRLBLEGLENTVYNEYYFRT  
ATEPVKAIYDVTIKVPGQKAFMSVEDGVKKMQNEPFAFNMYLIGYRMVDKYFYEHKCKGLHBIAYIQESNPYIA  
CRKNTPFMEIYKVLFRIREHIGIRREESLLISKKPICTARGGSFRSVNMIDCYPILLMLLYGMLISVSILALEKM  
MYRRRLGVTTNPDVAVELDS

>DpunIR7d.3

MNLTYGFITETFDILTIIINILQYKNINNVNIIHCDKSFDIITAHKMFAQNMRTGFLNIGDDVTRNINKHNPTIG  
IVLNTACESWKDTFDNIDTTNSFRYPFVWLIITNDVSATVNVLSQYPIQVDADVTIMYKSDTKETFELYETFNTG  
FNSNGTFQVQYKGPWNSTKNKTNIIFLTRMDLTGVLIKVTVVVTRNII NETIEESLVNGAKDGMDSLHKLKFMI LK  
YIQDMYNFTMELRSTHSGWYIRNGSFDGMVGALINGQADIGGSPIFFRIDRSKFIDYAVETWPSSFSFVFRHPKHS  
SGFHTIYTRPLDHSVWYCIFGLLLITGVSMFLILKVKIRNQSNDAEESSISLAFLFSFGSLCQQGMPISRKTASVK  
MLIFITFVYSVTLYQYNAVIVATLLREPPTTIKSLRDLLESNLKIGVEDVLYNKDYFQRTTDPVAIELYKKKIAY  
SKHYNFFEPDKGMALVKQGGFAFHLDNIIAYRFMQKQFTEREICELRDVILYPPQKMAAAVAKRSPYKEHMATGIR  
KIFESGLMRRWKTSLDAMPKCTHTPDSSIFS VNIREFSSPLIALTFGMIIALIIILCEIFIKNVTKD

>DpunIR87a

MHSKTLQAFLVTHFLAIVNSMVMTIGNSNQIAKTAECVLKLSAKYFVEKKALSGSIVIININSYESNTEGLLLQTI  
HGGLKYSVMVKDSFYPHANASHFPEKAKNYMLILEEKSELQRNMLQLNKLPTWNPLAKAVVFYQIKNNETAEGTAK  
ELINELRDYKLYRTIIIFIYDENNDEVISYTWKPYSETNCGGICQTVYILDI CRDSKLIQVEAQKEVFPSPDMKGCPL  
VVYAVVSEPYVMPPIRKLQASASYNDVYEFQSGGEVNLVKIISNFTNMSLVMRMSDREEDWGMIIYQNGTSTGAYSVL  
RNEFADLMIGNIEVSKTLRKYFHPTVSYIQDEMTWCVPKATPASTWDNLV IIFQWTTWVATFVCLFIMGLLFHYLY  
YREHNKNVTWKPTNSLLMTFSMLLGWASFSPKSSTFRILIFAWLCFSINMEVSYESFLRIFLMHPRFNKQISSQA  
ELIESGILSGGRDVYHKYFEDKNFSTFYLYRKYDTITFTBQVRSALKRDFAVVSSRRQAAYQDQKLKGQAQLIFC  
FPESDNLYKYGVVLLARKWFPLLERFNGIIRSVSENGLISKWNQEFLYQTKNDGTNTIVPLSTQHLLGAFMLIGLM  
YCMSLIIIFLVELISVYLVRNRNWNKVYIKRFGYVP

>DpunIR68a-2

MLELTLIIIMLPALQADKSTILKDVNEGKDLEYLMIDLNDLTKSQEVTCAIISDTVYLVNVDGEFFGWYTSVPM  
VMTVVEEYEDLLSPNFYTLES LRAARKQGCNVYVILLANGFQAARLLRFGDRHRILDTRAKYIMLHDHRLFHSDHL  
YLWKRIVNVIIFLKYHRKITGVQKS KAWFDLSTVPFPNP IQGVFVPRRVDIWSKGFHYNRSLFKDKTNLNGETLN  
VYLDHVPSVVVTTNNETKKVGGVEIEILNTLSEKMFHFKLYQPINADLHKWGQKQPNGSFSGLLGEMINGKSDI  
ALGNLQYNPYHLEHTDLSIPYTAQCWTFVTPEALSDNSWKTLILPFKLYMWIAVLLVLLITGSIIFYGLARYYINLQ  
EFRKDRREIASKFVESEKSGHMINDHDAKPVGLYLFGEIINSILYTYGMLLVVSLPKLPSGWSIRILTG CYWLYCI  
LLVVSYRASMTAILANPAPRVTIDTLKELADSKVTCGWGSETKQFFQDSDLDIGQKIGQKFETIDSPLQAANKVA  
KGIFAYYDNKDFLKYLIVERKNDFMMPNDNVNSTRNEIVENEKNLHIMSDCVVNIPISIGFHKNSPLKPLADVYMR

RIVEVGLVEKWLNDAMYSIKSLEKNEVEIKALMNLKKLYGAFIALAIGCFVSGVCLIGELLYWNFVVKRDPDFDKY  
ALNLYLKKKK

>DpunIR75q2-2

MNLTCLLVMLLYFSSSTICNANIDQQSKLIASVIRTFGRPATVISTVCWPKHRIVELFSYLSEENVQITSMVHIDEV  
NEIPRTNTQEHYTVFLVDLTCVNSIEFINMGNVQNYFRSPYRWIIIDKNNLASDIIIPQALTNVNILIDGEVLLVRN  
TNQLYLVYKINLISNWTIEFPNIRDDKNSLQISNQFVDSVALRRMNLKGNEIKICYVLTDDDSINHLTDKVKDYVD  
TITKVNFPPTNHLDDLFLNAQRKYYFANTWGYRVNGTWNMGTYLVRREVDIGGSPMFFTSERIPFVDYIASPTPTL  
SKFVFQQPKLSYENNLFLSFRTSVWYSIIALIFLVFLVLLIVTIWEWKMEYNKTETDFSIGVLRANIADIIVVLM  
FGAACQQGSPVELKGVLRVVMLILFLTLMFLYTSYSANIVSLLQSSSTQIKTLEDLLNSRIKLGVDHDTVFNKYF  
TTATEPIRKAIYEKKIAPPGAVPRFMSMEEGIIKMEKGLFAFHMEIGVGKFKVFGKYFKEGKCGLREIQYLQVMDP  
YLAVQKDTPYKEMFKILGKRIQEHGLQNRNRFLEYKRPKCSGRESNFVSVSMVDCYPALLVLSYGTIFALVILAF  
ESLWFYRHNIRNKIRCLLHEHKVRYH

>DpunIR75p.1-2

MNIKLISISFLLLFTTFTTIRAYDNDVIKMIISFLIYNERPTSMVLPYLCWDPYQIKILVKSCLDEGIGTAYSFQYN  
RTEYHLQYSVIIADLDCPRTSKFMLMANQQGYFKSPYRWLLSSNETNPILEDIEMSVDSDVVIARRINNERFI  
EAYKISEKSEIIYTKRLVWNNNDNTKANQETINKLPSKLNVISKALIPGNLLVNGKDSSKNIFLSNYGVIEDYRET  
KVLARSNNLKRHTLTMANVITDSNETRKHMDRLHLHQDSITKMSYGVVKVCFEMLNATEKLIFHTWGYRDKNG  
KWQIVDHLIKKEADLGLTIFTQERMDADVDIAMVGSTAVRFVFREPPPLAYISNIFTLPFTGNVWLAILICVVG  
AVFLYFTSKWEASMSMHPLQLDGSWADVLILIGAVLQQGCTQEPRYAAGRCVTLILFVALTILYAAYSANIVVLL  
RAPSSSVRSLPDLNLSPLKLGASDFEYNRYFFKKLNDPIRKAIYDKKIAPKGKPNYYTMEEGVEKVRKGLFAFHM  
ELNPGYRLIQETYQEDEKCDLVEIDYINEIDPWVPGQKRSFPKDLFKINFLKIRESGLQMLHRRLLQVGKPKCSGQ  
VATFSSVGIQDMGPAMLASLYGVLLAPAILALEITYKKLITAREMRKSLIEDQFINPYLD

>DpunIR75p-3

MKLIILILHFLSLSTAKDITTIKFIKSFIVNDNKPSTLVFSLCWTKSIVSLAKEMSEMGIKASSSKYLESAENFQ  
EHTVFLIDLDECDAAEVIVMAGSKQLFRLGYRWLVLTNDTDEVSSSLHRSTLYNSPVLADSDLVLAKRSGNQF  
VVVELYKPGLNFTMQTYSRGYFDDSFIDVRPHRELFRRRRNLLGYGITMANVIQDSNSTKYHLPKENGLEPQHDAI  
AKICWMNAKLAFEMLNATPRYIFSYRWGYKVNGQWSGMINDLHSEADLGTNCVVSIDIERLNVVITYTDM LAPFRVR  
FIFRQPLPYVSNIFSLPFRTSVWLAVFICCIISTVTIYFATKWEARIVRVSSPTQLDGTVSDAMLLTMSAVSQG  
CAMEPKKASGRIMLVWLF TALMALYAAYSANIVVLLQAPSNSIRTLHQLAYSKMTLAANDVDYNHFI FSLFKDPDH  
VSIYKIQPEKGREQFYELNEGVEKIRQGLFAFHSIVEPVYRRVEETFLETEKCDLMEIDFLGSFDPFVPVKKDS  
FLELLRVV

>DpunIR75d-2

MSVRLQASDNRAFVSRFSWLLLHNGTYETNIIESFFYINILPDSVDKISGPDYLLDIYKIKPNHPLVITSLDLNRN  
SSLKELSSFWNNFPTPVKRRKDLNSVYLTAATIVTQPPQYFKGWSDLTNREIDTYPKLTYPLMMLCSEDLNFRYNLR  
QVDLYGDELNGSFNGLAGLLQRNEIEVGITSMFMRADRFVGLHYSSSETVSLTGAFIFRQPSQSAVSNI FLLPF SRD  
VWLASAVVFLSSGLVLALLSRQLFHM DPILSQLTLSEAFFALGTVCQQGFHVTPVMASARVVMFFTLLTTALFAFT  
AYSAKIVAILQTPSDAIQTIDDLTNSPMGMGIQETTYKKVYIAESNEPATQRLYRHKLPLGERAYLSVVDGISRV  
RSGLFAYQVEQSSGYDVISKTFFEEHEKCGLKEIEAFSLPMVAIPIKKHSGYRELLASRLRWQREVGLIDRASSIWL  
AAKPRCDSASAGFVSVGLLDILPAIQVLAAGAFVAVLILLAEITFAKSSRD

>DpunIR41a-2

MLLLPNSTLLPIENLFYALFDHYLYTSICLTFISEIPLYVQVSI SFTFLVPNNTTEGLMYQILPISEMGCSDYIVL  
MRHPEDFMVAFEKVVHMGNSRRSDRKIIIFLPYLEGSSNSNCSTDLLEVLMSKESSFVANILLALPVEDHLEGISFD  
LVTHKYVGLDSEVYQPLYLDRWNSITKTFEKNVNLFPNDIRNLQGKTVRVGCFTYKPYVLLNLDTAISPLDRDGM  
MRIIDEFCRWNCNCTVEVNEEEGQWGELYDNQTGIGVSVVEDRADFGISALYSWYEEYRMLDFSVAIGRTAITC  
LAPSPRLLP SWELPFLPFSSWYMYAVILTFIFASIGLIIAKRCSADQVFLTVFGILISQSHYSADSTWKVRRTGW  
LLITGLILASAYGGGLASSFTIPKYEPSIDTVQDLVDRKLEWGATHDAWIFSLTSLKQPLVKQLVSQFKTYTSDQL  
KKKSFTRSMAYSIEKLPAGYFAIGEYLTREALLDMTIMLEDFYENCVMMLRKSSVYTERISELIGRLHQSGLIHA  
WETQVALKHLDDYKVQLEVKLSRSKGDVGTFHGLSLQDL LVFYI

>DpunIR93a-2

MKVGSLLLLLCIVFSGEDFPPLITANASIAVVLDRQYLGEKYQAVLDELKDYIKELARVELKHGGVVVHYYSWTAI  
SLRKGFLAVFSVASCEDTWSLFDRTQEEELLLFALTEVDCPRLPVNSAITVTYSEPGGELPQLLLDLRSSNAVKWK  
SAVILHDDTLSRDMVSRVVQALTTQKDEDSAPPVSVTVFKMKHEINEYLRRKETHRVLSKLPVKYIGENFISIVTS  
DVMTTMADTARELLMSHTTAQWLYIISD TDKYNGLNSSLVNLYEGENVAYIYNVSDNHPSCKNIGIMCYCEEMMDA  
FIAALDAAIQDEFDVAQVSDEEWEAIRPTKAQRRTLLKHMQLHILSKSSCGNCTRWRLISADTWGATYRDFDT  
PDPKAKDTNDTFTGAIENINLLDVGYWRPIDAIKFKDVLFPVHAHGRFGKELPIITYHNPPWTILKTNESGAVVSY  
SGLVFDIVNQLAKNKNTTIRIILPANVKEYFSNSSVDMHSESAMLTAAVAKRQAALAAASFTVLPDPMPGINYT  
VAISTQSYSEMIVRPRELSRALLFLLPFTTDTWLCLGLAVVLMGPALFVVHRWSPYEEAMEITREGGLSTIHNC  
LYIYGALLQQGGMYLPRADSGRLVVGTTWWLVVLVVVTTYSGNLVAFLTFPKQEVVNTVSELLENSATYTWLSKGG  
YLEMELKNSDEPKYKTLKGAQLTRGIGGMEGNSEVMVNEILNRVRNERHALIDWKLRLSYLLHADHLATGTCDFV  
LSSEEFMDERVAMIVPSGSPYLPVINKEINRMQKAGLITKWL SAYLPKRNRCKWTSTVAQEVNDHTVNLSDMQGSF  
FVLFLGFFSASSVLFLEWLYNRRKRRSEQVVIKPYTE

>DpunIR21a-2

MASFIQCCVISFCIMNVTFSEEIEYYASESVLDSKKSILIERARKRVKRNNILSIKNNTNAAKQWRDLNIEIKEF  
KGAKIKRAVDSTFHGYPKTREELWNERFLNESTAFDQTPSLIKLLHNITVTYLDKCTPVILYDNLVKDKESFIFQN  
LLKGFVPTFVHGYIGDNDQPKPKLLRTVKECLHFMIFLTDIKRSKVLGKQSDSKVVIARSSQWAVEEFLAGPL  
SRMFTNLLVIGQSFNEDVDNTLEAPYIILYTHKLYTDGLGASQPVVLSNWSWTHGKFSRYVNLFPKMTDGYAGHRFV  
AASNQPPFVFRRIKTDLGGNPRVVDGIELRVLALLAERNNFSIEIEPHEPNLPGDVAKEITMGRADIAVAG  
MYLTSEIRIDMDMSFAHSQDCAVFITLMSTALPRYAILGPFHWHVWVTLILTYLFGMFPLAFSDKHTLRHLINNS



GEIENMFWYVFGTFTNCFTFLGKNSWSKTTKITTRLLIGWYWIFTIIITSCYTGSIIAFVTLPIFPETVDTIDQLL  
SGFYRIGTLDRGGWERWFLNSSDPKTNKLFRKIEFVNPVNESGIRNTTKAFFWPYAFLGSQSELEYIVQANFSKTKS  
KRAVLHISNECFAPFSVVMGFPNNSLHGKKLSNDIRIMFQTGLIDKIADEVRWEMQRSSTGGFLSAGKGSCLKIASA  
EEKGLTLEDTQGMFLLLAAGFLMGATALISEWMGGFSRKCCFRKTPPKSISEEELAGTPDVEALNVLCNGTDSRL  
DFGTRASTDSRDTLDGKVINVTENILVHGDFNTNQVWSRRSSSIDLDKEVKDIFEKDEKRRQRMNTPFLDSAKS  
ESTASKDAFGDRVK

>DpunIR76b

MTGIDLIISTICNATFCEVIYDNPKELPQTRTQSELYYLAKINGKHLKIATYDNPISWVEKGNGTINVGRGTAF  
VIVEILQKRNFNTYELVVPERNYESGGVKPEDSVIGLLNASKVDMVA AFLPKLTKYQKMVSFSHTLDEGVWRMMLK  
RPKESAAGSGLLAPFDSLWVYLILAVVFFYGPCISLLTHIRSKIINDEEHNLPISPSFWFVYSAFIKQGTSLAPEA  
NSTRILNGETLNVVYLDHVPSSVVVTTNNETKKVGGVEIELNTLSEKMNHFHPKLYQPINADLHKWGQKQPNGSFSG  
LLGEMINGKSDIALGNLQNPYHLEHTDLSIPYTAQCWTFVTPEALSDNSWKTLILPFKLYMWIAVLLVLLITGSI  
FYGLARYYINLQEFRKDRREIASKFVESEKSGHMINDHDAKPVGLYLFGEIINSILYTYGMLLVVSLPKLPSGWSI  
RILTGCWLYCILLVVSYRASMTAILANPAPRVITIDTLKELADSKVTCCGWGSETKQFFQDSDLDDIGQKIGQKFET  
IDSPLQAANKVAKGIFAYYDNKDFLKYLIVERKNDFMMPNDNVNSTRNEIVENEKNLHIMSDCVVNIPISIGFHK  
N SPLKPLADVMMRRIEVEGLVEKWLNDAMYSIKSLEKNEVEIKALMNLKKLYGAFIALAIGCFVSGVCLIGELLYWN  
FVVKRDPDFDKYALNLYLK

>DpunIR68a

LHDHRLFHSDLHYLWKRIVNVI FLKYHRKITGVQKSAWFDLSTVPFPNP IQGVFVPRRVDIWSKGKFHYNRS LFK  
DKTNNLNGETLNVVYLDHVPSSVVVTTNNETKKVGGVEIELNTLSEKMNHFHPKLYQPINADLHKWGQKQPNGSFSG  
LLGEMINGKSDIALGNLQNPYHLEHTDLSIPYTAQCWTFVTPEALSDNSWKTLILPFKLYMWIAVLLVLLITGSI  
FYGLARYYINLQEFRKDRREIASKFVESEKSGHMINDHDAKPVGLYLFGEIINSILYTYGMLLVVSLPKLPSGWSI  
RILTGCWLYCILLVVSYRASMTAILANPAPRVITIDTLKELADSKVTCCGWGSETKQFFQDSDLDDIGQKIGQKFET  
IDSPLQAANKVAKGIFAYYDNKDFLKYLIVERKNDFMMPNDNVNSTRNEIVENEKNLHIMSDCVVNIPISIGFHK  
N SPLKPLADVMMRRIEVEGLVEKWLNDAMYSIKSLEKNEVEIKALMNLKKLYGAFIALAIGCFVSGVCLIGELLYWN  
FVVKRDPDFDKYALNLYLK

>DpunIR93a

MMHSESAMLTAAVAKRQAALAAASFVLPDPMPGINYTVAISTQSYSMIVRPRELSRALLFLLPFTTDTWLCIG  
LAVVLMGPALFVVHRWSPYIEAMEITREGGLSTIHNCWLYIYGALLQQGMYLPRADSGRLVVGTTWWLVVLVVVTT  
YSGNLVAFLTFPKQEVVNTVSELLEN SATYTWSLSKGGYLEMELKNSDEPKYKTLLKGAQLTRGIGGMEGNSEVM  
VNEILNRVRNERHALIDWKLRLSYLLHADHLATGTCDVFLSSEEFMDERVAMIVPSGSPYLPVINKEINRMQKAGL  
ITKWSAYLPKRNRCWKSTSTVAQEVNDHTVNLSDMQSGSFVFLGLGFFSASSVLSGVVVQ

>DpunIR75d

LSNVYLTAATIVTQPQYFKGWSDLTNR EIDTYPKLTYPMLMLCSEDLNFRYNLRQVDLYGDELNGSFNGLAGLLQR  
NEIEVGITSMFMRADRFVGLHYSSSETVSLTGAFIFRQPSQSAVSNIFLLPFSRDVWLASAVVFLSSGLVLALLSRQ  
LFHM DPILSQLTLSEAFTFALGTVCQQGFHVTPVMASARVVMFFTTLTALFAFTAYS AKIVAILQTPSDAIQTIDD  
LTNSPMGMGIQETTYKKVYIAESNEPATQRLYRHKLLPLGERAYLSVVDGISRVRSGLFAYQVEQSSGYDVISKTF  
EEHEKCGLKEIEAFSLPMAIPIKKHSGYRELLASRLRWQREVGLIDRASSIWLAAKPRCDSAASGFVSVGLLDIL  
PAIQVLAAGAFVAVLILLAEITFAKSSRDLLRCR

>SfruIR25a

MSSLTVFLLFYFIRNTFGQTTQNI NVLLINEESNALAEKAF EVAKEYVRRNPSLGLAVDPVIVVGNRTDAKV FLEN  
VCRKYNDMLS AKKTPHVVDFTMTGVGSETIKSFTEALS LPTISGSFGQVGD LRQWRSLNANQTRFLLQVMP PADI  
LPEAIRAIVTKQDITNAIIFDEFFVMDH KYKSL LQNIPTRHVITPVKSFEANEIKTQLESRLNLDIVNFFIVGSL  
RTIKNVLDAAADKNQYFGRKTAWFALSLEKGDISCGCKNATIVHIRPTDANSRDLRGKIKT TYSMNGEPEITS AFY  
FDLSLRTFLTIKSLD SGKWPNDMKYITCDDYDGKNTPNRTL DLKTA FQEIKETPTYAPFYIPDDPMNGRSYMEF  
STDLLATVTKDGASISSHSLGSKAGLSSNLTLTDPNMNSYSAQLVYRIVTVEQKPFIRDEQAPKFGKGYCIDL  
IEEIRAI VKFDY EITLAPDGNFGTMDENGWNWGIKELVDKKADIGLSSLSVMAERENVVDFTVPYD LVGITIMM  
KLPRTP TSLFKFLT VLENDVWLSILAAYFFTSFLMWVFDKWS PYSYQNNREKYKEDEEKREFTLKECLWFCMTSLT  
PQGGGEAPKNLSGRLLAATWWLFGFIIIASYTANLA AFLTVSRLDTPIESLDDL SKQYKIQYAPLNGSAAMTYFQR  
MANIEEFY EIWKEMSLNDSLKEVERAKLAVWDYPVSDKYSKMWQAMEEAVLPNTIEEAIQRVRDSKSSSEGF A WL  
GDATDVKYHVMTSCDLQSVGDEF SRKPYAIAVQQG SPLKDQFNNAI LQLLNKRKLEKLEIWNWNNNPESMKCEKQD  
DQSDGISIQNIGGVFIVIFMGI GLACVT LGVEYWWYKWRKRPAVG DVTQVEPAKFTRNNVDKQEGGFNFRGRNLGL  
NFKPKF

>SfruIR60a

MNFSVEIMSPGKEVEICDKDNYNLGVLHVDTFVAIP SAN YFIIIDSYTDFS YLASKLIRSRSWNPFAKFIILLFN  
YVRNDKINIEYVEKVLSCLFKYNAINIVIAVPQASNVRNAIISWRPYDPPKYCGYFNETAKDRLVAVNTCERGR L  
KYNNSVFEDKV PYDMNGCVMEILALQRQPFISDDEQYTSIEKIMIDRMLKRFKMKAHYHFL EGFRGEREN VGEWNG  
ALKKLSSKTGQLLLGGIFPDFDVHEDFETTTTYLADVTVWVPRAPKSAPWVALVVFVKRLVWYSVIVCVFLCGIA  
WTVIGRLSGESPYNKSLFHCFLNTWITTMGFVTYLHPKKDSL RVYFVFLNMYCILFSAAYQTQLFDVLTRTSYDHQ  
MNTVQELVDSGIKFGGYEELHDLFYNSTDPFDNLIGE KWDIENITDALINVAVYRNFSLLCSKLELKHISAVTPA  
LSDNAGNYNYHTFSDNVFNVP IETIALRGFPFMLKFSTTITIFKQSGLNEGLRHQFTEFTERRARQLRDL LKEKS  
DVSPLTAKHLQGGFFALFLGYVSGIFTLIAEVLVNTGSFKKKFAQCKRKL NFM

>SfruIR75d

KYVGGRFDLRQVD FYGVSHNGSFDGLVGHLQRREAEVGLASLFMRHDRMQVADFFSETCVLACAFIFRQPSRS AVS  
NVFLAPFSAGVW GASACVAASAALLLVALRRLRQTRASTDLRLFTLLEAITFALGSLCQQGCKDSFNLTRFVVRL  
PHVHRVFRFVPQDAAGDVQHAADVTVRVHGVLRQDRGHLADSKQRAADHRRPGAVSHDHRPGHHLQDGL  
LSREPGEVDAAAVPAQDPAAGRARVPQRRGRHRARHRLRLPGGEELWLRHNQADVHGAREVQPQRDRGVQAAAR  
GRAHEETLRI

>SfruIR64a

MNLLCNLLLALSVDVRLVIDIFKLNKNGVIFHCYDNYVVS NVHKVLNEHGILVASANIDYNTYNVATSYPKV

GLVIDAACERWTSVLDSDTISFQGYSFIIITEDVTGTTEMLSQYPIEVSDSVIVAHKINQTFNLYEVFNTGTYKRG  
TYNVRKVGHWNSTSLFINSFNRWNLQGI FVKTAVI ILTTPRIVNQTIEQYMEKPIKSQIDVDTVHRMKYFIMLKFM  
DMYNISYDIHRVSTGWYQNRGSDGMVNALYQGM AEIGGAPIFYRIDRGERVQYISEVWMSRHSFLFRHPKYPGGF  
YTIYTRPLSDVWVYCVVAMLAVTAVTLWVMLVVQNHKGDNEDSSLSLAGLVIWGAICQQGISINRESTSTKLVI FT  
TFVYAVTLYQYYNATIVSSLLLEPPRNIRTLKDILDSDLKAGSHDIVYDRDYFKRTTDPVAIELYHKKVATSAQYN  
FFTPEEGIALVKKGGFAFHIDTTFAFPLIKATFTEREICETTLVQMYPLQRMGVVVRKHSPYKEHIAYAIRKMYEV  
GLPPRIQSEIDEPMPECAHTPDSSIFCVGIREFSTPLLALTFGMATSI VVLLCEI I IDRVVQLGRVRDFRH

>SfruIR40a

MLLLKLLRVILFVCGVSVHGGFFDVRDVTSDIMTSLPKDFS VAVKDIAEALPSKSI TIVRGNSTNIRSQDVFE LFCM  
LSEHNVLTNLDIATKENKQKYYELLKKALDVSDQRTSLILCEPYECENILYELTDNNLIHSMILYIFYWSYQGV  
S ETFLMTIKEAMRVAVITNPRESVFRIYYNQGTSDRLNHLTLVNWWSGRLYKSPVLPPPDKVYHDFKGRVFEVPVLH  
APPWHFVKYNNNDNTITVTGGRDDKLLALIAKKLNFKYKYDPPDRSQGSSISGNGTFKGTGLGLIWKRKADFFLG  
DVTMTWERLQAVEFSFMTLADSGAFLTHAPAKLSETLAIIRPFQWEVWPLVFATLLVTGPALWIVIAAQLWQKRKCD  
QLSLFSSCCWFTTTTLFLRQSSSKEPSSSTHKARLVSVLISLGATYVIGDMYSANLTSLIAKPSRERPIGTLSALEEA  
MRDYGQYQLVVESHSSSLAILENGTVGYGRLANLMRRQVRQVRNVEVGVRLVLSHKRVAVLGGRETLYYDTERFGS  
HNFHLSSEKLYTRYSAIALQIGCPYLETFNNVMTLFEAGI IAKMTTDEYKNLPEHARRSDPVTESDKQGGEVVLGDS  
AAASSQTPQGESTKGLQPVSLRMLRGAFCLLGIGHLLAAISLAVEIQLHRRSKRRKKPAQNEHRKAQKLLVLGKSV  
LLFKRGCKKVCTSMFTSIDKALGSDVKD

>SfruIR100

MRALHLVVLFLHTVNCLEIEIPQRVYTDKLLKCSLDIIKKYFAETKVMTYVGSKVHDKELLQAIHDMNLVSMVSKR  
ADSKVPVPHQGYLICAKNFTHFVGHFNTNIKEATWNPANARFLFIVRELTYEKLKTI FDIITLKLHVNDVVVNSTDD  
ADLYTYNPFNDYNCGKRYDDIIISYGKCEADSINLYPNKFVTGLRNCTFRVWTTQWPPYTMVPEVNSTDPFL LKHG  
VEPYLLSLMGEMLGFDLDIIGHKDI TDDFPTVSKDMEAGISLKRIQDNEVDIVVGGMLLVPSRAAAFFVYVGHQVY  
TDEIRFVVRATEEPAWKNVYLEFSTTVWVLLLLTLVLVSYFILIILLRAADKGYIVLILLDILVLHGRNIRSRWV  
KMVLLSWVLFAYLVNVFYQSNLVSLTTPVLQYQISNEEDIFKYNLKPCLSLIMGRYYIESVQSDREYDMDSGCYG  
LMESVETVSKSDNLFALLLYAIYQYYEDDYFDEYGDPRVTVSKPYSKVIYTFYLYKGFPLIHDLCQKCLQLRENG  
LVDKAMRDLNFLKKIKHTFRQSQFQPRFAVPWIVYVFGCTISIVTFAIELLSKY

>SfruIR41a

MLLPNITFPLELLLNAIITQYMESAYCVTVFSDKPLSLTFTNSFIYLVPEEDNLVEQIFNVSEMGCSDYIVCMRDP  
QNFMTAFERVVHIGNVRRSDRKV IILPYNEEYNENSNDENLPSLIFSMKGSEYLANMLMVNRNSNNSDCKAFDLVT  
HQFVGPDMDMSNLPIYLDWRWDSCTQQFENDANLFPQDMTNLYGKTKVKVACFTYKPYVLLDIDTAIEPLGRDGV EIRI  
VDEFCRWLNCTVELVREDVDQWGEIYKNESGGVGVGISVVEDRAHLGITALYSWYEEYRVMDFSVAGVRTAITCIA  
PAPRLSSWEMPLMPFTWYMWLAVVFTYFYASTGILTAQGCSSSYFPLNAFGMMIGQSQYEGKPSWKIRSVTGWL  
LIAGLILSSAYGAGLASTFTVPRYEPSIDTVQDIVDRKMEWGATHDAWIFSLTLSSEPLVKELVKQFRIYSFDELK  
RKSFTRSMAYSIEKLPAGNFAIGEYVTQEA ILDMMLMEDFYFEQCVMVMRKSSPYTEKVSQ LIGRLHQSGLLLAW  
ETQVR

>SfruIR75p

MSAARLCIPQRLTAPSVGDSRDRQSFMSVRRTGLQGSGIFMVVSIEDPGLLELQWFWEVVAGFSHKKGDEYLLIE  
ELGIECRKTSRNMDAHILVPTLAVFI FLVKYVDSNDFDLDVISSFVTLDERPVSLLI PFVCWKQHDLKSLARRMCE  
VGVSTATSLQYNRTEYDLQYVLI IADLSCEGTDRFLVKASKEGYFKAPYRWLLLNYEDDDTALLHADILVSDVVL  
VNKIHDQBYWFVEAYKISENSEI IHTKRLIWRRNNTKLDKNI TFMDQNNVTDTYNTTSPV IYQYNDI KNNRLGVPT  
NTDVLKVTVTKYGRVEDYRSSNVLSSRRYDLRGHTLTMTVNVITDSNETRLHMNDRLYLHQDCITKMSYAVVSI CFH  
MLNATERLLFTHTWGYKDKNGQWQGI VDHLLKKDADLGTLTIFTQERMDVVDYIAMVGTTAVRFVFPREPLSYISN  
IFTLFPSTGTWLAIFICVLGCSIFLYIASKWEASMGHPLQLDGSWADVLILIIGAVLQQGCTLEPRYGAGRCVTL  
ILFIALTVLYAAYSANIVVLLRAPSSSVRSLPDLNLSPLKLGASDFEYNRYFFKKLNDPIRKAIYEKKIAPKKGQA  
NFYSMKDGV ERIRKGLFAFHMELNPGYRLIQETYQEDEKCDLVEIDYINEIDPWVPGQKRSPFKDLFKINFLKIRE  
SGVQANVHQRLTVARPRCSGHVSTFSSVGITDMPAMLM TLYGMLLAPAVLLEIITYKRLMTIRNQKRLVDPDHI  
PFRH

>SfruIR76b

MAGIELIISSICNATFCEVPYNETYQAPDALAEKDINFMSLMKEVNGKHIKVTTYNNTPLSSTEFENGTVVGKQVA  
FTIMNILRKKNFTYEVILPTKNFELGDKISDDSI IGLLNTSKVDMAVAFIPTLLPYREKVSFSIDLDEGVWVMM  
L KRPKESAAGSGLLAPFNDLVWYLVLA AVLTFGPCITFTFRVRSKLITDDEGVLP LKPSFWFVYSAFLKQGTNLSPE  
ANTTRVLFTVWWLFMILLSAFYTANLTAFLTL SKFTLAIESPRDLYQKNNRWVASAGSSVEHVVKTEGEDLYFLNT  
MINSKGARFLSVLGDKDFLEHVKKGEVLVKEQT VVDHLMYNDYISKKDVEESEKCTYVVAPSAFMKKQRAFAYPVG  
SKLKGLFDPVLTQIFQAGILDFLKRS DLPSTKICPLDLQSKDRKL RNSDLIMTYMVMVAGSATAVAVFGAEIFIKR  
YVSGKLNKNKKS KRKSKTGKPSRSHDDSRPPYDSLFGKNPKFNVENTRTKMINGREYVVFETSSGDKKLIPARA  
PSSFLYRSDK

>SfruIR75q.1

MIVAHTSYVIFTVTSQTVVAFTMKYLTFFLNIIICLNFVSLNTNSKLQI IVDIAKSFNKPTS VVAKMCWESNKRK  
YAPVEAKLAKMLANLDRPMNIRYLRANETIENDNYPNNDLLFIMNRTCEDANAFLRWASANHKKFRKSYRWLILGKS  
LIIKDETFKVSPEFDNIRISVDSEV IIEENNTDEVSLHTFYK LKPHQTQWIIEDYGNWSPITGFIKSRTRIESNVM  
RRKDFMGETLITSAISDNSTKTDLGLGNIFIDTPAKSSFRITVPLFDFLNATKVVI FSDTWGYFINGSWNGMIG  
DISRGEADLCGIVTFITKERMTILEYLTHPTITLKFVFRQPPLSYQNNLFLLPSTGVWLCTGAFIVILIAILYI  
NTRWDAKKYKYYNKQKIDQTC LPTTWSDITIFVLISAISQGGSSNELKGT LGRLVMFLVFLAFVFLYTSYSANIVVL  
LQSTSNQIRTLSDLLHSRLELGL EHAPFNKFYFSSAYTADDP IKKALVDTKIAPKGVLTNMNIEQGVRIMQKRPF  
AFNMNTGTGYRIVSAIFQEHEKCGLQEIEYIPNSNPWLCSRRLSPYGELFKVGYIRIQEHGLSDRENRLIYAKKPA  
CTVMGGSFGSVNMVDFHPVCLVLLYGMILAFLLLGVEILVHRKQMKIRNQAVVE
